# Supplementary material for: Genomic and functional analyses unveil the response to hyphal wall stress in Candida albicans cells lacking β(1,3)-glucan remodeling
Source: BMC Genomics. 2016 Jul 2;17:482. doi: 10.1186/s12864-016-2853-5 (PMC4942948; doi:10.1186/s12864-016-2853-5)
Supplement: Additional file 1: — Transcriptional profile of wild type and phr1Δ cells during induction of hyphal growth. (XLSX 735 kb) [file 12864_2016_2853_MOESM1_ESM.xlsx]

## Sheet: Legend
WT 1 h
ORF refers to the Genome Assembly 19 Orf number
WT refers to the expression ratio of the wild type at 1 h with respect to time zero
	Red: genes up-regulated at 1 h with respect to time zero (cutoff ≥2)
	Green: genes down-regulated at 1 h with respect to time zero (cutoff ≤0.5)
WT FDR refers to the False Discovery Rate (p-value ≤ 0.05)
CGD ID refers to the primary CandidaDB ID
Gene Name refers to the standard name at CandidaDB
Description according CandidaDB
mut 1 h
ORF refers to the Genome Assembly 19 Orf number
phr1 refers to the expression ratio of the mutant at 1 h with respect to time zero
	Red: genes up-regulated at 1 h with respect to time zero (cutoff ≥2)
	Green: genes down-regulated at 1 h with respect to time zero (cutoff ≤0.5)
phr1 FDR refers to the False Discovery Rate (p-value ≤ 0.05)
CGD ID refers to the primary CandidaDB ID
Gene Name refers to the standard name at CandidaDB
Description according CandidaDB
WT 3 h
ORF refers to the Genome Assembly 19 Orf number
WT refers to the expression ratio of the wild type at 3 h with respect to time zero
	Red: genes up-regulated at 3 h with respect to time zero (cutoff ≥2)
	Green: genes down-regulated at 3 h with respect to time zero (cutoff ≤0.5)
WT FDR refers to the False Discovery Rate (p-value ≤ 0.05)
CGD ID refers to the primary CandidaDB ID
Gene Name refers to the standard name at CandidaDB
Description according CandidaDB
mut 3 h
ORF refers to the Genome Assembly 19 Orf number
phr1 refers to the expression ratio of the mutant at 3 h with respect to time zero
	Red: genes up-regulated at 3 h with respect to time zero (cutoff ≥2)
	Green: genes down-regulated at 3 h with respect to time zero (cutoff ≤0.5)
phr1 FDR refers to the False Discovery Rate (p-value ≤ 0.05)
CGD ID refers to the primary CandidaDB ID
Gene Name refers to the standard name at CandidaDB
Description according CandidaDB
WT 5 h
ORF refers to the Genome Assembly 19 Orf number
WT refers to the expression ratio of the wild type at 5 h with respect to time zero
	Red: genes up-regulated at 5 h with respect to time zero (cutoff ≥2)
	Green: genes down-regulated at 5 h with respect to time zero (cutoff ≤0.5)
WT FDR refers to the False Discovery Rate (p-value ≤ 0.05)
CGD ID refers to the CandidaDB ID
Gene Name refers to the standard name at CandidaDB
Description according CandidaDB
mut 5 h
ORF refers to the Genome Assembly 19 Orf number
phr1 refers to the expression ratio of the mutant at 5 h with respect to time zero
	Red: genes up-regulated at 5 h with respect to time zero (cutoff ≥2)
	Green: genes down-regulated at 5 h with respect to time zero (cutoff ≤0.5)
phr1 FDR refers to the False Discovery Rate (p-value ≤ 0.05)
CGD ID refers to the CandidaDB ID
Gene Name refers to the standard name at CandidaDB
Description according CandidaDB
NOTE: orf19.1816 and orf19.2355 refer both to ALS3

## Sheet: WT 1 h
1 h
ORF	WT	WT FDR	CGD ID	Gene Name	Description
orf19.3374	71.9849	5.60354e-06	CAL0004191	ECE1	Protein comprising eight 34-residue repeats;hyphal-specific expression increases with extent ofelongation of the cell; regulated by Rfg1p, Nrg1p, Tup1p,Cph1p, Efg1p, Hog1p, farnesol, phagocytosis; maycontribute to biofilm formation
orf19.2060	61.538	2.31086e-06	CAL0004456	SOD5	Copper- and zinc-containing superoxidedismutase, protective role against oxidative stress;induced by neutrophil contact, hyphal growth, caspofungin,osmotic or oxidative stress; member of a gene familyincluding SOD1, SOD4, SOD5, and SOD6
orf19.5542	45.8762	0.000548141	CAL0006162	SAP6	Secreted aspartyl proteinase; expressed uponhyphal growth, during oral carriage, mucosal, systemicinfections; sap4 sap5 sap6 triple mutant has defects insystemic virulence, survival in macrophage, and proteinutilization for nitrogen
orf19.1327	24.599	8.14482e-07	CAL0003763	RBT1	Putative cell wall protein with similarity toHwp1p, required for virulence; predicted to be cell-wallattached and glycosylated; Tup1p repressed; serum, hyphaland alkaline induced; farnesol, alpha factor induced;Rfg1p-, Rim101p-regulated
orf19.3384	24.484	1.52767e-06	CAL0004205		Putative cell wall protein with C-terminal similarity to Hwp1p; alkaline upregulated; alpha factor induced; Rim101p-regulated; merged with orf19.1327 in Assembly 20
orf19.701	23.9488	1.56196e-06	CAL0001699	CFL11	Predicted ORF in Assemblies 19, 20 and 21;similar to ferric reductase Fre10p; flucytosine repressed;possibly adherence-induced
orf19.2355	23.7743	8.90619e-07	CAL0000753	ALS10	ALS family protein; ALS family includes cell-surface glycoproteins, some with adhesin function; putative GPI-anchor; filament induced; regulated by Nrg1p, Rfg1p, Tup1p; merged with orf19.1816 in Assembly 20
orf19.2431	21.5953	9.07764e-06	CAL0001514		Predicted ORF in Assemblies 19, 20 and 21;transcription is induced in response to alpha pheromone inSpiderM medium
orf19.1816	18.4639	6.36015e-06	CAL0001605	ALS3	Adhesin; ALS family; role in epithelialadhesion, endothelial invasiveness; allelic variation inadhesiveness; immunoprotective in mice; predicted GPI-anchor cell wall protein; macrophage, hyphal induced, pH,Nrg1p, Rfg1p, Tup1p regulated
orf19.3112	17.0919	0.000856332	CAL0002233	ZRT1	Protein described as zinc transporter; hyphal-and macrophage-induced; alkaline upregulated by Rim101p;induced upon adherence to polystyrene
orf19.1321	17.0551	2.63175e-06	CAL0003753	HWP1	Hyphal cell wall protein; covalently crosslinkedto epithelial cells by host transglutaminase; opaque- anda-specific, alpha-factor induced; at MTLa side ofconjugation tube; assessment of virulence role complicatedby URA3 effects
orf19.4716	16.5897	5.18656e-07	CAL0004374	GDH3	Protein described as similar to NADP-glutamatedehydrogenase; hyphal downregulated expression;transcription is regulated by Nrg1p, Plc1p; downregulatedby Efg1p; upregulated by Rim101p at pH 8; ciclopiroxolamine induced
orf19.4590	15.7869	1.86163e-05	CAL0002933		Predicted ORF in Assemblies 19, 20 and 21;regulated by Nrg1p
orf19.6028	15.1294	5.50202e-06	CAL0005075	HGC1	Hypha-specific G1 cyclin-related proteininvolved in regulation of hyphal morphogenesis; Cdc28p-Hgc1p maintains Cdc11p S394 phosphorylation during hyphalgrowth; required for virulence in mouse model; regulatedby Nrg1p, Tup1p, farnesol
orf19.1996	13.4625	8.23207e-05	CAL0002743	CHA1	Protein similar to serine/threoninedehydratases, catabolic; negatively regulated by Rim101p;expression greater in low iron; regulated on white-opaqueswitching; filament induced; transposon mutation affectsfilamentous growth
orf19.2210	11.4527	6.02387e-05	CAL0006180		Predicted ORF in Assemblies 19, 20 and 21
orf19.3111	11.0064	1.4072e-05	CAL0002231	PRA1	Mediates leukocyte adhesion, induces migration;binds integrin alphaMbeta2; immunogenic in mouse; athyphal cell surface, not yeast-form; produced at ambientpH; Rim101p induced; 17-beta-estradiol, ethynyl estradioldownregulated
orf19.2948	10.8102	0.00011525	CAL0006041	SNO1	Protein of unknown function expressed duringstationary phase; transcription is regulated by Tup1p,Efg1p
orf19.6630	9.14385	3.42944e-06	CAF0007071		ORF Predicted by Annotation Working Group
orf19.2457	9.04806	8.90619e-07	CAL0001562		Predicted ORF in Assemblies 19, 20 and 21
orf19.385	8.58726	0.00148648	CAL0004920	GCV2	Putative protein of glycine catabolism;downregulated by Efg1p; Hog1p-induced; upregulated byRim101p at acid pH
orf19.2685	8.4689	1.14111e-05	CAL0003532	PGA54	Putative GPI-anchored protein; hyphal induced;Hog1p-downregulated; induced in a cyr1 or efg1 homozygousnull mutant; shows colony morphology-related generegulation by Ssn6p; possibly spurious ORF (AWGprediction)
orf19.3219	8.43506	6.21451e-06	CAL0003230		Predicted ORF in Assemblies 19, 20 and 21
orf19.5585	8.29952	2.33545e-05	CAL0006261	SAP5	Secreted aspartyl proteinase; sap4 sap5 sap6triple mutant has defects in virulence and utilization ofprotein as nitrogen source; expressed in mucosal &amp;systemic infections, oral carriage; absent from lessvirulent species, C. dubliniensis
orf19.2125	7.79787	1.62327e-06	CAL0005305		Predicted ORF in Assemblies 19, 20 and 21
orf19.6277	7.74372	1.48101e-06	CAL0000572		Predicted ORF in Assemblies 19, 20 and 21
orf19.386	7.62534	6.28229e-06	CAL0004923	SAM4	Alkaline upregulated
orf19.1065	7.60838	7.60257e-06	CAL0001208	SSA2	Cell-surface protein of the HSP70 family;antigenic; role in sensitivity to beta-defensin peptides;localizes to surface of hyphae, but not yeast-form cells;farnesol-downregulated in biofilm; caspofungin repressed
orf19.5292	7.57839	0.00180546	CAL0003673	AXL2	Protein not essential for viability; similar toS. cerevisiae Axl2p, which is a plasma membrane proteininvolved in determination of budding pattern; O-glycosylated by Pmt4p
orf19.288	7.55993	0.000117636	CAL0004097		Predicted ORF in Assemblies 19, 20 and 21
orf19.1510	7.36171	7.16689e-05	CAL0005401		Protein not essential for viability
orf19.2551	7.29252	1.81971e-05	CAL0002475	MET6	5-methyltetrahydropteroyltriglutamate-homocysteine methyltransferase (cobalamin-independentmethionine synthase); antigenic during murine or humansystemic infection; heat shock, estrogen, possibly biofilm(reports differ), and GCN-induced
orf19.5691	7.1076	9.47973e-05	CAL0000744	CDC11	Septin; required for wild-type cell and hyphalmorphology, agar-invasive growth, full virulence andkidney tissue invasion in mouse, but not for kidneycolonization, immunogenicity; phosphorylation is hyphal-and cell-cycle-regulated
orf19.1585	6.5537	0.000123857	CAL0005643	ZRT2	Protein described as predicted zinc transporter;ciclopirox olamine, fluconazole, or alkalinedownregulated; transcriptionally induced by interactionwith macrophage; amphotericin B induced
orf19.2770.1	6.52264	6.28229e-06	CAL0004268		Predicted ORF in Assemblies 19, 20 and 21
orf19.1120	6.40224	2.22909e-06	CAL0001911	FAV2	Induced by mating factor in MTLa/MTLa opaquecells; greater mRNA abundance observed in a cyr1homozygous null mutant than in wild type; filamentinduced; regulated by Nrg1p, Rfg1p, Tup1p; possiblyspurious ORF (AWG prediction)
orf19.3934	6.1407	5.60118e-06	CAL0002934	CAR1	Transcription is regulated by Nrg1p, Mig1p, andTup1p; shows colony morphology-related gene regulation bySsn6p; alkaline upregulated
orf19.242.2	6.05289	8.2957e-06	CAL0003978	SAP8	Secreted aspartyl proteinase; regulated bygrowth phase, temperature, and white-opaque switch; highlyexpressed in opaque cells; expressed upon deep epidermalinvasion; greater expression during vaginal infection thanoral infection
orf19.1350	6.04808	4.86531e-05	CAL0003853		Predicted ORF in Assemblies 19, 20 and 21
orf19.3782	5.87507	2.73098e-06	CAF0006996		ORF Predicted by Annotation Working Group;intron in 5'-UTR
orf19.5015	5.71738	1.30049e-05	CAL0001595	MYO2	Class V myosin; nonessential; required for wild-type actin cytoskeletal polarity, nuclear organization andmigration, and hyphal growth; sole class V myosin in C.albicans; conserved myosin ATPase and tail domains
orf19.7308	5.66095	7.16941e-05	CAL0004511	TUB1	Alpha-tubulin; gene has intron; complements cold-sensitivity of S. cerevisiae tub1 mutant; C. albicans hassingle alpha-tubulin gene, whereas S. cerevisiae has two(TUB1, TUB3); farnesol-upregulated in biofilm
orf19.5505	5.47673	3.09043e-05	CAL0006063	HIS7	Putative imidazole glycerol phosphate synthase;enzyme of histidine biosynthesis; fungal-specific (nohuman or murine homolog); transcription is induced byhistidine starvation; regulated by Gcn2p and Gcn4p
orf19.1064	5.45363	9.26379e-06	CAL0001207	ACS2	Probable acetyl-CoA synthetase, similar to knownfungal acetyl-CoA synthetases; antigenic during murinesystemic infection; antigenic in human; upregulated byEfg1p; macrophage-induced protein; soluble protein inhyphae
orf19.5595	5.43613	2.01986e-05	CAL0006287		Predicted ORF in Assemblies 19, 20 and 21
orf19.5147	5.36651	5.8216e-06	CAL0002579		Predicted ORF in Assemblies 19, 20 and 21
orf19.1702	5.30314	1.34338e-05	CAL0000758	ARF3	Transcription is filament induced; Tup1pregulated (see Locus History Note for Assembly 19correction)
orf19.1333	5.26491	5.89453e-06	CAL0003790	SNG3	Predicted ORF in Assemblies 19, 20 and 21; showscolony morphology-related gene regulation by Ssn6p
orf19.2416.1	5.24819	2.38713e-06	CAF0006950	MLC1	Protein with microtubule-dependent localizationto the Spitzenkorper, also localizes to cytokinetic ringin hyphae; cell-cycle dependent localization to bud tip(polarisome) and bud neck in yeast and pseudohyphal cells
orf19.85	5.11401	2.93436e-06	CAL0000682	GPX2	Similar to glutathione peroxidase; expressiongreater in high iron; alkaline upregulated by Rim101p;transcriptionally induced by alpha factor or interactionwith macrophage; regulated by Efg1p; caspofunginrepressed
orf19.4579	5.08777	7.41512e-06	CAL0002881		Predicted ORF in Assemblies 19, 20 and 21
orf19.716	5.03254	1.33914e-05	CAL0001743		Predicted ORF in Assemblies 19, 20 and 21;regulated by Nrg1p, Tup1p; transcription is repressed inresponse to alpha pheromone in SpiderM medium
orf19.5639	4.96082	2.5059e-05	CAL0000622	HIS4	Multifunctional enzyme that catalyzes threesteps of histidine biosynthesis, with phosphoribosyl-AMPcyclohydrolase, phosphoribosyl-ATP diphosphatase, andhistidinol dehydrogenase activities; required for wild-type adhesion to human calls
orf19.3794	4.93755	0.000445607	CAL0001310	CSR1	Putative DNA-binding transcription factor; 5 C-terminal zinc-finger motifs; similar to S. cerevisiaeZap1p; transposon mutation affects filamentous growth;suppresses S. cerevisiae rok1 mutant inviability
orf19.3352	4.92779	0.00030117	CAL0004153		Predicted ORF in Assemblies 19, 20 and 21
orf19.1203.1	4.9259	8.87421e-06	CAL0002765	SRO77	Predicted ORF in Assemblies 19, 20 and 21;filament induced; fungal-specific (no human or murinehomolog)
orf19.6176	4.91867	9.68349e-06	CAL0006099	SEC61	Essential protein; expected to act in proteintranslocation from the endoplasmic reticulum: similar toS. cerevisiae Sec61p; chimeric mutant partiallyfunctionally complements S. cerevisiae sec61 defects; 10transmembrane regions predicted
orf19.2061	4.90017	0.000224259	CAL0004459		Protein not essential for viability
orf19.2593	4.85439	0.0158023	CAL0002565	BIO2	Protein described as biotin synthase;transcriptionally regulated by iron; expression greater inhigh iron; transcription is downregulated in response totreatment with ciclopirox olamine
orf19.4723	4.82736	0.000236952	CAL0004396		Predicted ORF in Assemblies 19, 20 and 21
orf19.4181	4.816	1.63028e-05	CAL0005846	SPC2	Transcription is induced upon filamentousgrowth
orf19.1631	4.77416	5.04391e-05	CAL0006397	ERG6	Delta(24)-sterol C-methyltransferase, convertszymosterol to fecosterol in ergosterol biosynthesis bymethylating position C-24; mutation confers nystatinresistance; fluconazole-induced; transcription increasedin azole-resistant strain
orf19.1822	4.73686	6.43087e-05	CAL0001625		Putative transcription factor with zinc clusterDNA-binding motif; similar to S. cerevisiae Ume6p, whichis a transcription factor involved in regulation ofmeiotic genes; alkaline upregulated; filament induced;regulated by Nrg1p, Tup1p
orf19.1517	4.67534	8.82169e-05	CAL0005414	ARO3	3-Deoxy-D-arabinoheptulosonate-7-phosphatesynthase; enzyme of aromatic amino acid biosynthesis; GCN-regulated; feedback-inhibited by phenylalanine whenheterologously produced in S. cerevisiae; Aro3p and Aro4pcatalyze the same reaction
orf19.6573	4.57219	7.54361e-05	CAL0003273	BEM2	Putative Rho1p GTPase activating protein (GAP);serum-induced transcription
orf19.4993	4.5661	2.48027e-05	CAL0000029	SEC18	Functional homolog of S. cerevisiae Sec18p,which acts in protein transport; conserved ATP bindingsite; not glycosylated
orf19.6327	4.51826	1.14111e-05	CAL0001291	HET1	Putative sphingomyelin transfer protein
orf19.3459	4.49241	0.000164344	CAL0005015		Predicted ORF in Assemblies 19, 20 and 21
orf19.1715	4.47444	1.95506e-05	CAL0000781	IRO1	Putative transcription factor; role in ironutilization, pathogenesis; both IRO1 and adjacent URA3 aremutated in strain CAI4; suppresses S. cerevisiae aft1mutant low-iron growth defect; hyphal-induced; reportsdiffer about iron regulation
orf19.586	4.45371	0.000113245	CAL0000341	ERV46	Transcription is induced upon filamentousgrowth
orf19.3895	4.44404	0.00768437	CAL0002204	CHT2	Chitinase; putative N-terminal catalytic domain,GPI anchor, O-mannosylated region, signal peptide; 3 N-glycosylation motifs; downregulated in core caspofunginresponse; induced in yeast-form cells; Cyr1p-, Efg1p-, pH-regulated
orf19.1815	4.41126	6.02768e-05	CAL0001603		Predicted ORF in Assemblies 19, 20 and 21
orf19.2364	4.40188	5.03386e-05	CAL0000766	MIS11	Protein described as similar to precursor ofmitochondrial C1-tetrahydrofolate synthase; putativeprotein of glycine catabolism; downregulated by Efg1p;fluconazole-induced
orf19.7579	4.37467	0.000114739	CAL0000184	FGR34	Protein lacking an ortholog in S. cerevisiae;transposon mutation affects filamentous growth
orf19.4026	4.35611	8.0769e-06	CAL0004729	HIS1	ATP phosphoribosyl transferase; enzyme ofhistidine biosynthesis; fungal-specific (no human, murinehomolog); upregulated in biofilm; acidupregulated/alkaline downregulated by Rim101p; regulatedby Gcn2p, Gcn4p; strain CA9 is a his1 mutant
orf19.1012	4.34209	1.29742e-05	CAL0001042		Predicted ORF in Assemblies 19, 20 and 21
orf19.3051	4.31981	2.96396e-05	CAL0001429		Predicted ORF in Assemblies 19, 20 and 21; showscolony morphology-related gene regulation by Ssn6p
orf19.5830	4.25667	0.000245179	CAL0002323		Protein similar to S. cerevisiae Hsp70p;predicted Kex2p substrate
orf19.1690	4.25328	5.63008e-05	CAL0000187	TOS1	Protein described as similar to alpha agglutininanchor subunit; fluconazole-induced; transcription isinduced in response to alpha pheromone in SpiderM medium
orf19.2013	4.22584	8.4763e-06	CAL0004332	KAR2	Similar to chaperones of Hsp70p family;transcriptionally regulated by iron; expression greater inhigh iron
orf19.3994	4.20551	0.00296592	CAL0003173		Predicted ORF in Assemblies 19, 20 and 21
orf19.715	4.1767	4.93482e-05	CAL0001742		Predicted ORF in Assemblies 19, 20 and 21
orf19.3475	4.14567	6.2721e-06	CAL0005062		Described as a Gag-related protein; hyphalinduced; downregulation correlates with clinicaldevelopment of fluconazole resistance; repressed by nitricoxide, 17-beta-estradiol, ethynyl estradiol
orf19.6180	4.11869	0.000344609	CAL0006114		Protein similar to Pichia anomala YDL054c and S.cerevisiae Ydl054cp; transmembrane regions predicted
orf19.5073	4.11022	5.68301e-05	CAL0001756	DPM1	Protein with similarity to S. cerevisiae Dpm1p,which is dolichol phosphate mannose synthase; filamentinduced; Tup1p-regulated
orf19.804	4.10427	2.34311e-05	CAL0002609		Predicted ORF in Assemblies 19, 20 and 21
orf19.5337	4.09441	2.21586e-05	CAL0004297	UBC15	Predicted ORF in Assemblies 19, 20 and 21
orf19.1344	4.09244	0.000676411	CAL0003826		Predicted ORF in Assemblies 19, 20 and 21;fluconazole-induced; possibly spurious ORF (AnnotationWorking Group prediction)
orf19.6828.1	4.07734	2.50193e-05	CAL0005705		Predicted ORF in Assemblies 19, 20 and 21
orf19.4647	4.01916	1.22163e-05	CAL0003705	HAP3	Protein described as similar to CCAAT-bindingtranscription factor that regulates respiration;expression greater in low iron; transcription is opaquespecific, alkaline upregulated, ciclopirox olamineinduced
orf19.1917	4.01525	0.000109284	CAL0002522		Predicted ORF in Assemblies 19, 20 and 21
orf19.1390	4.01367	5.00456e-05	CAL0003967	PMI1	Phosphomannose isomerase; cell wall biosynthesisenzyme; drug target; functional homolog of S. cerevisiaeand E. coli phosphomannose isomerase; Gcn4p-regulated;repressed by 3-AT; induced on adherence to polystyrene,phagocytosis
orf19.2098	4.00229	5.82784e-06	CAL0004570	ARO8	Protein abundance is affected by URA3 expressionin the CAI-4 strain background; alkaline upregulated;Gcn4p-regulated
orf19.3031	3.92398	1.65438e-05	CAL0001383		Predicted ORF in Assemblies 19, 20 and 21
orf19.1738.1	3.90933	1.10653e-05	CAL0000839	UGP1	Protein similar to UTP-glucose-1-phosphaturidyltransferase; localizes to cell surface of yeast-formcells, but not hyphal cells; Hog1p-downregulated
orf19.2614	3.88565	9.35459e-06	CAL0003380	RSR1	RAS-related protein; GTP/GDP cycling requiredfor wild-type polar bud site selection, hyphal growthguidance; role in systemic virulence in mouse;geranylgeranylation predicted; suppresses S. cerevisiaecdc24-4 mutant heat sensitivity
orf19.1559	3.87901	2.91945e-05	CAL0005534	HOM2	Putative aspartate-semialdehyde dehydrogenase;fungal-specific (no human or murine homolog); ketoconazole-repressed
orf19.4600.1	3.85722	1.44018e-05	CAL0003579		Predicted ORF in Assemblies 19, 20 and 21
orf19.7381	3.84297	8.52999e-05	CAL0004794		Predicted zinc-finger protein of unknownfunction; not essential for viability
orf19.1254	3.80549	0.0001641	CAL0002954	SEC23	Transcription is regulated upon yeast-hyphalswitch
orf19.4593.1	3.79722	0.00154503	CAL0002942	RGA2	Putative GTPase-activating protein (GAP) for Rho-type GTPase Cdc42p; involved in cell signaling pathwaysthat control cell polarity; similar to &lt;i&gt;S.cerevisiae&lt;/i&gt; Rga2p; induced upon low-level peroxidestress
orf19.3534	3.78424	0.000189236	CAL0005878	RHO3	Putative Rho family GTPase; possible substrateof protein farnesyltransferase andgeranylgeranyltransferase type I; greater transcription inhyphal form than yeast form
orf19.5384	3.78381	0.00362433	CAL0004405	CHS8	Chitin synthase; nonessential; 8 or 9 membranespanning regions; mRNA present in yeast-form and hyphalcells; induced during cell wall regeneration; fungal-specific (no human or murine homolog)
orf19.183	3.7556	5.15197e-05	CAL0003242	HIS3	Imidazoleglycerol-phosphate dehydratase, enzymeof histidine biosynthesis; functionally complements S.cerevisiae his3-1 mutation; hyphal-induced expression;regulated by Gcn2p and Gcn4p; fungal-specific (no human ormurine homolog)
orf19.3549	3.70556	4.92015e-05	CAL0005915	CDC21	Predicted ORF in Assemblies 19, 20 and 21;flucytosine induced
orf19.1055	3.68165	9.08158e-06	CAL0001190	CDC3	Septin; essential for viability; functionalhomolog of S. cerevisiae Cdc3p; down-regulation associatedwith azole resistance; macrophage/pseudohyphal-repressed;gene has intron
orf19.3259	3.67618	3.11452e-05	CAL0003345		Predicted ORF in Assemblies 19, 20 and 21
orf19.2756	3.66731	1.22069e-05	CAL0004240		Predicted ORF in Assemblies 19, 20 and 21
orf19.3823	3.65638	0.00474947	CAL0001987	ZDS1	Nonessential protein; similar to S. cerevisiaeZds1p
orf19.2297	3.64623	2.35958e-05	CAL0006416		Predicted ORF in Assemblies 19, 20 and 21;induced by nitric oxide in yhb1 mutant
orf19.3266	3.6202	0.000105353	CAL0003367		Predicted ORF in Assemblies 19, 20 and 21
orf19.3438	3.61648	3.49603e-05	CAL0004972		Predicted ORF in Assemblies 19, 20 and 21
orf19.4349	3.61256	2.40867e-05	CAL0001022		Protein of unknown function, transcription is repressed in the presence of elevated CO2; predicted ORF in Assemblies 19, 20 and 21
orf19.6812	3.61131	1.73582e-05	CAL0005653	PMT2	Essential protein mannosyltransferase with rolesin hyphal growth and drug sensitivity; member of the PMTfamily which includes Pmt1p, Pmt2p, Pmt4p, Pmt5p, andPmt6p; induced during cell wall regeneration
orf19.2546	3.60786	0.000233182	CAL0002466	TRP2	Predicted ORF in Assemblies 19, 20 and 21;regulated by Gcn2p and Gcn4p
orf19.3642	3.60775	2.71313e-05	CAL0000399	SUN41	Putative cell wall glycosidase involved inbiofilm formation; hyphal induced; caspofungin repressed;Efg1p, Cph1p regulated; predicted signal sequence, O-glycosylation, potential Kex2p substrate; 9 5' E-boxes; 5'-UTR intron
orf19.3447	3.59331	2.42509e-05	CAL0004996		Predicted ORF in Assemblies 19, 20 and 21
orf19.4506	3.58967	1.99777e-05	CAL0002622	LYS22	Putative homocitrate synthase; fungal-specific(no human or murine homolog); repressed by nitric oxide
orf19.6217	3.58674	0.000275303	CAL0000444	PGA63	Putative protein of unknown function
orf19.1761	3.58285	0.000360063	CAL0000897		Predicted ORF in Assemblies 19, 20 and 21
orf19.2777	3.58203	8.42663e-05	CAL0004273		Predicted ORF from Assembly 19; removed from Assembly 20
orf19.3793	3.5819	2.4668e-05	CAL0001309		Predicted ORF in Assemblies 19, 20 and 21;regulated by Nrg1p; greater mRNA abundance observed in acyr1 or ras1 homozygous null mutant than in wild type;possibly spurious ORF (Annotation Working Groupprediction)
orf19.2923	3.56903	7.25117e-05	CAL0005989		Predicted ORF in Assemblies 19, 20 and 21;transcription is induced in response to alpha pheromone inSpiderM medium
orf19.6632	3.55762	2.99486e-05	CAL0004005	ACO2	Protein described as aconitate hydratase 2;regulated by Gcn4p; repressed in response to amino acidstarvation (3-aminotriazole treatment); transcriptionallyregulated by iron; expression greater in high iron
orf19.7675	3.50249	9.30525e-05	CAF0007124		ORF Predicted by Annotation Working Group
orf19.797	3.49871	1.59628e-05	CAL0002029	BAT21	Protein described as a branched chain amino acidaminotransferase; regulated by Gcn4p, Gcn2p; induced inresponse to amino acid starvation (3-aminotriazoletreatment)
orf19.7098	3.49288	0.000869682	CAL0002200		Predicted ORF in Assemblies 19, 20 and 21;repressed by nitric oxide
orf19.1265	3.49259	0.000187922	CAL0002988		Predicted ORF in Assemblies 19, 20 and 21
orf19.7610	3.46817	4.57025e-05	CAL0000818	PTP3	Protein not essential for viability; similar toS. cerevisiae Ptp3p, which is a protein tyrosinephosphatase; hyphal induced; alkaline upregulated;regulated by Efg1p, Ras1p, cAMP pathways
orf19.2947	3.46034	0.000259985	CAL0006040	SNZ1	Similar to stationary-phase-related proteins;soluble in hyphae; induced on yeast to hyphal switch, inresponse to 3-aminotriazole, or in azole-resistant strainoverexpressing MDR1; regulated by Gcn4p, macrophage; nohuman, murine homolog
orf19.4177	3.45971	0.0014508	CAL0005821	HIS5	Predicted ORF in Assemblies 19, 20 and 21; Gcn4p-regulated
orf19.2496	3.44811	0.00207277	CAL0001662		Predicted ORF in Assemblies 19, 20 and 21;fluconazole-downregulated
orf19.3911	3.44228	1.95506e-05	CAL0002855	SAH1	Protein described as S-adenosyl-L-homocysteinehydrolase; predicted enzyme of sulfur amino acidmetabolism; antigenic in human; biofilm-, alkaline-,fluconazole-induced expression; Gcn4p-regulated; aminoacid starvation (3-AT) repressed
orf19.3099	3.40819	1.55894e-05	CAL0001533	TRP4	Predicted enzyme of amino acid biosynthesis;upregulated in biofilm; regulated by Gcn2p and Gcn4p; S.cerevisiae ortholog is Gcn4p regulated
orf19.789	3.40774	0.000856235	CAL0001995	PYC2	Putative pyruvate carboxylase, binds to biotincofactor; gene is up-regulated in a mutant lacking theSsk1p response regulator protein, upon benomyl treatment,or in an azole-resistant strain overexpressing MDR1
orf19.5591	3.38531	4.97586e-05	CAL0006279	ADO1	Predicted ORF in Assemblies 19, 20 and 21;ketoconazole-induced
orf19.6456	3.37346	0.00125654	CAL0002234		Predicted ORF in Assemblies 19, 20 and 21
orf19.3751	3.27902	2.16457e-05	CAL0001213		Predicted ORF in Assemblies 19, 20 and 21
orf19.5406	3.27463	0.000161846	CAL0005162		Predicted ORF in Assemblies 19, 20 and 21
orf19.4755	3.27182	1.96642e-05	CAL0004481	KEX2	Subtilisin-like protease (proproteinconvertase), processes aspartyl proteinase Sap2p; requiredfor hyphal growth and wild-type virulence in mousesystemic infection; functional homolog of S. cerevisiaeKex2p, which processes alpha-factor
orf19.4732	3.2514	2.03092e-05	CAL0004422	SEC24	Possible role in ER to Golgi transport; inducedupon yeast-hyphal switch
orf19.2754	3.24854	0.000104319	CAL0004238		Predicted ORF in Assemblies 19, 20 and 21
orf19.4930	3.23836	6.45229e-05	CAL0006274	SPC3	Essential protein; similar to S. cerevisiaeSpc3p, a component of the signal peptidase complexrequired for signal peptidase activity; predicted integralER membrane protein; complements spc3 and suppresses sec61S. cerevisiae mutants
orf19.1372	3.22617	2.72171e-05	CAL0003908		Gene transcription regulated by Mig1p and Tup1p
orf19.88	3.22109	3.85821e-05	CAL0000685	ILV5	Protein described as ketol-acidreductoisomerase; antigenic during human or murineinfection; regulated by Gcn4p; induced upon amino acidstarvation (3-aminotriazole); macrophage-downregulatedprotein; no human or murine homolog
orf19.5760	3.21505	0.00117995	CAL0001488	IHD1	Putative GPI-anchored protein of unknownfunction; alkaline upregulated; greater transcription inhyphal form than yeast form; regulated by Nrg1p, Rfg1p,Tup1p; regulated by Tsa1p, Tsa1Bp in minimal media at 37;not essential for viability
orf19.2533.1	3.20648	2.09813e-05	CAF0006956		ORF Predicted by Annotation Working Group
orf19.6012	3.20436	0.00108233	CAL0005044		Predicted ORF in Assemblies 19, 20 and 21
orf19.1036	3.20165	1.82854e-05	CAF0006884		Putative alpha-mannosidase
orf19.3889	3.20081	0.000285888	CAL0002185		Predicted ORF from Assembly 19; removed from Assembly 20
orf19.7112	3.17575	3.15062e-05	CAL0002845	FRP2	Protein described as ferric reductase; alkalineupregulated by Rim101p; fluconazole-downregulated;upregulated in the presence of human neutrophils; possiblyadherence-induced
orf19.7673	3.17448	0.0029154	CAL0000979		Predicted ORF in Assemblies 19, 20 and 21
orf19.3409	3.17044	0.00105491	CAL0004877	SEC12	Protein described as a guanyl-nucleotideexchange factor; transcriptionally regulated by iron;expression greater in high iron
orf19.1478	3.16961	4.92015e-05	CAL0004694		Predicted ORF in Assemblies 19, 20 and 21
orf19.6034	3.16815	2.90155e-05	CAL0005101	TUB2	Beta-tubulin; functional homolog of S.cerevisiae Tub2p; hyphal-induced; fluconazole-induced;gene has two introns; overproduction causes inviability inS. cerevisiae
orf19.252	3.16388	0.000244667	CAL0004004		Predicted ORF in Assemblies 19, 20 and 21
orf19.2886	3.16225	0.000141479	CAL0005224	CEK1	ERK-family protein kinase, required for wild-type yeast-hyphal switching, mating efficiency, andvirulence in a mouse model; Cst20p-Hst7p-Cek1p-Cph1p MAPKpathway regulates mating, and invasive hyphal growth undersome conditions
orf19.4603	3.15241	4.12464e-05	CAL0003584		Predicted ORF in Assemblies 19, 20 and 21
orf19.290	3.15068	2.33161e-05	CAL0004102	KRE5	Predicted UDP-glucose:glycoproteinglucosyltransferase; required for wild-type 1,6-beta-D-glucan biosynthesis, hyphal growth, and virulence in mouseIV infection; production in S. cerevisiae partiallycomplements defects of a kre5 mutant
orf19.1654	3.14901	4.71001e-05	CAL0000038		Predicted ORF in Assemblies 19, 20 and 21
orf19.7089	3.13891	0.0045186	CAL0002178	PMR1	Putative secretory pathway P-type Ca2+/Mn2+-ATPase, required for protein glycosylation and cell wallmaintenance; putative ortholog of S. cerevisiae PMR1
orf19.2298	3.11846	2.65249e-05	CAL0006417		Predicted ORF in Assemblies 19, 20 and 21
orf19.4447	3.11695	2.69856e-05	CAL0001851	YMC1	Predicted ORF in Assemblies 19, 20 and 21;flucytosine induced
orf19.1405	3.11674	0.000454266	CAL0004458	PHO13	Transcription is regulated upon yeast-hyphalswitch
orf19.5692	3.10866	0.000144974	CAL0000745		Predicted ORF in Assemblies 19, 20 and 21
orf19.2615	3.10089	4.70512e-05	CAL0003383	MDL1	Putative mitochondrial, half-size MDR-subfamilyABC transporter
orf19.1618	3.10005	0.00011525	CAL0006344	GFA1	Glucosamine-6-phosphate synthase; enzyme ofchitin/hexosamine biosynthesis; homotetrameric; inhibitedby UDP-GlcNAc, FMDP, N-acyl peptide, kanosamine-6-P;functional homolog of S. cerevisiae Gfa1p; growth-phaseregulated; catalytic Cys
orf19.3955	3.09734	3.90898e-05	CAL0003012	MES1	Cytoplasmic methionyl-tRNA synthetase (MetRS);has zinc-binding motif; genes encoding ribosomal subunits,translation factors, and tRNA synthetases aredownregulated upon phagocytosis by murine macrophage
orf19.6459	3.07892	6.52715e-05	CAL0002240	DPP3	Protein similar to S. cerevisiae pyrophosphatephosphatase Dpp1p; required for farnesol biosynthesis;downregulated in response to 17-beta-estradiol, ethynylestradiol
orf19.316	3.07421	3.42481e-05	CAL0004667	SEC13	Protein described as protein transport factor;antigenic during murine systemic infection; macrophage-downregulated protein abundance
orf19.5102	3.07416	2.01986e-05	CAL0002487	PLB5	Putative phospholipase B, fungal-specific (nohuman or murine homolog); null mutation eliminates cell-associated phospholipase A2 activity and attenuatesvirulence; putative GPI anchor
orf19.5130	3.07085	0.000133581	CAL0002547	PDI1	Protein described as protein disulfide-isomerase; antigenic in human; soluble protein in hyphae;transcription is induced upon filamentous growth
orf19.4382	3.07016	2.56234e-05	CAL0001142		Predicted ORF in Assemblies 19, 20 and 21
orf19.1693	3.06277	0.000355973	CAL0000189	CAS4	Protein similar to S. cerevisiae Tao3p;essential for viability; insertion mutation near 3' end ofgene causes increase in caspofungin sensitivity;transcription is induced in response to alpha pheromone inSpiderM medium
orf19.2939	3.05911	0.000218207	CAL0006025		Predicted ORF in Assemblies 19, 20 and 21
orf19.2618	3.05905	0.00159336	CAL0003388	MET2	Putative homoserine acetyltransferase; Gcn4p-regulated; macrophage/pseudohyphal-repressed; not greatlyinduced by biofilm formation, in contrast to many enzymesof sulfur amino acid metabolism; fungal-specific (no humanor murine homolog)
orf19.4513	3.05516	1.63961e-05	CAL0002652		Protein not essential for viability; possiblyspurious ORF (Annotation Working Group prediction)
orf19.3843	3.04963	7.52902e-05	CAL0002063		Predicted ORF in Assemblies 19, 20 and 21
orf19.6988	3.04884	5.14348e-05	CAL0000404		Predicted ORF in Assemblies 19, 20 and 21
orf19.548	3.04023	2.8376e-05	CAL0000214	CDC10	Septin, required for wild-type cell, hyphal, orchlamydospore morphology; role in virulence and kidneytissue invasion in a mouse model of systemic infection;forms ring at sites of cell division and filaments inmature chlamydospore
orf19.3394	3.038	0.000328071	CAL0004222		Predicted ORF in Assemblies 19, 20 and 21;transcription is induced in response to alpha pheromone inSpiderM medium
orf19.6414.3	3.03607	6.79604e-05	CAL0002136		Predicted ORF in Assemblies 19, 20 and 21;possibly spurious ORF (Annotation Working Groupprediction)
orf19.5689	3.03607	3.09043e-05	CAL0000741		Predicted ORF in Assemblies 19, 20 and 21
orf19.1653	3.02818	0.000143593	CAL0000036		Predicted ORF in Assemblies 19, 20 and 21;possibly spurious ORF (Annotation Working Groupprediction)
orf19.6237	3.02239	0.000150264	CAL0000480	RAC1	G-protein of RAC subfamily; required forembedded filamentous growth, but not for serum-inducedhyphal growth; dynamic localization at plasma membrane;similar to, but not interchangeable with, Cdc42p; lacks S.cerevisiae homolog
orf19.5445	3.01394	3.98603e-05	CAL0005263	GLO3	Protein not essential for viability; similar toS. cerevisiae Glo3p, which is a GTPase-activating proteinfor ADP-ribosylation factors
orf19.1986	3.00062	0.000105276	CAL0002708	ARO2	Putative chorismate synthase; fungal-specific(no human or murine homolog)
orf19.3844	2.9972	3.42896e-05	CAL0002064	MRP8	Protein not essential for viability; similar toS. cerevisiae Mrp8p, which is a mitochondrial ribosomalprotein; greater transcription in hyphal form than yeastform
orf19.7219	2.99244	0.000413894	CAL0003776	FTR1	High-affinity iron permease (ferric citrate,ferrioxamines E or B, transferrin); required for mousevirulence, low-iron growth; iron, amphotericin B,caspofungin, ciclopirox, Hog1p regulated; complements S.cerevisiae ftr1 iron transport
orf19.2952	2.98784	0.000100667	CAL0006050	EXG2	Protein similar to S. cerevisiae Exg2p, which isan exo-1,3-beta-glucosidase; predicted Kex2p substrate;induced during cell wall regeneration
orf19.7446	2.98734	0.000100667	CAL0005552	OPI3	Putative phosphatidylethanolamine N-methyltransferase of phosphatidylcholine biosynthesis;downregulation correlates with clinical development offluconazole resistance; amphotericin B repressed;caspofungin repressed
orf19.4890	2.94927	0.00017738	CAL0005519	CLA4	S/T kinase of Ste20p family; required for wild-type filamentous growth and for wild-type organcolonization and virulence in mouse systemic infection;role in chlamydospore formation; functional homolog of S.cerevisiae Cla4p
orf19.1051	2.94628	0.000578334	CAL0001183	HTA2	Protein described as histone H2A; farnesolregulated
orf19.1782	2.94018	8.77204e-05	CAL0000962		Predicted ORF in Assemblies 19, 20 and 21
orf19.2432	2.93611	0.000215125	CAL0001516	HAC1	Putative transcription factor with bZIP DNA-binding motif; induced during the mating process;caspofungin induced
orf19.4109	2.92723	0.000285729	CAL0005560	PMT4	Protein mannosyltransferase required for normalcell wall composition and full virulence in mouse systemicinfection; has roles in hyphal growth and drugsensitivity; one of 5 PMT family members; Axl2p is asubstrate
orf19.3765	2.92434	0.000164394	CAL0001245	RAX2	Protein of unknown function; detected at yeast-form cell plasma membrane by mass spectrometry;transcription is filament induced and negatively regulatedby Rim101p, Tup1p
orf19.4831	2.92421	0.000564757	CAL0005352		Predicted ORF in Assemblies 19, 20 and 21
orf19.3856	2.90548	0.00166463	CAL0002090	CDC28	Cyclin-dependent protein kinase, interacts withregulatory subunit Cyb1p; involved in determination ofcell morphology during the cell cycle; phosphorylatedprimarily by Swe1p and phosphorylation is regulated byHsl1p; intron in 5'-UTR
orf19.4560	2.90065	2.82822e-05	CAL0002819		Predicted ORF in Assemblies 19, 20 and 21
orf19.4247	2.89902	0.000223591	CAL0000226		Predicted ORF in Assemblies 19, 20 and 21
orf19.1490	2.86818	7.91306e-05	CAL0004775	MSB2	Protein of unknown function; transcription isnegatively regulated by Rim101p
orf19.6202	2.86748	0.000111221	CAL0000427	RBT4	Similar to plant pathogenesis-related proteins;required for virulence in mouse systemic, rabbit cornealinfections; not required for filamentation; secretionsignal; TUP1/RFG1/SSN6/HOG1 repressed; serum, hyphal,pheromone, alkaline-induced
orf19.6779	2.86647	7.29192e-05	CAL0004966	PRO2	Predicted ORF in Assemblies 19, 20 and 21;regulated by Gcn2p and Gcn4p
orf19.6293	2.86361	5.03386e-05	CAL0000619		Predicted ORF in Assemblies 19, 20 and 21
orf19.2322.3	2.85994	6.36198e-05	CAF0006946		ORF Predicted by Annotation Working Group
orf19.3013	2.85089	2.84091e-05	CAL0001344	CDC12	Septin; essential for viability; gene haspredicted splice sites; forms ring at sites of celldivision and also forms filaments in mature chlamydospore;filamentous growth induced; regulated by Nrg1p, Tup1p,tyrosol and cell density
orf19.2283	2.85038	6.22418e-05	CAL0006377	DQD1	Predicted ORF in Assemblies 19, 20 and 21;ketoconazole-repressed; macrophage-downregulated proteinabundance
orf19.5685	2.84806	3.27867e-05	CAL0000735	THS1	Putative threonyl-tRNA synthetase; transcriptionregulated by Mig1p and Tup1p; genes encoding ribosomalsubunits, translation factors, and tRNA synthetases aredownregulated upon phagocytosis by murine macrophage
orf19.6702	2.84612	2.27995e-05	CAL0004700	DED81	Putative tRNA-Asn synthetase; genes encodingribosomal subunits, translation factors, and tRNAsynthetases are downregulated upon phagocytosis by murinemacrophage
orf19.7538	2.84168	0.000146722	CAL0000026		Predicted ORF in Assemblies 19, 20 and 21
orf19.5563	2.83239	2.38952e-05	CAL0006204	RNH1	Protein described as Ribonuclease H (RNAse H);hyphal-induced; flucytosine induced; similar to orf19.5564(see Locus History)
orf19.1992	2.81886	0.00547414	CAL0002739	SIR2	Regulator of phenotypic switching in strain3153A; mutation does not affect white-opaque switchingrate in strain WO-1; similar to S. cerevisiae Sir2p;partially functionally complements S. cerevisiae sir2mutant mating defect
orf19.479.2	2.81509	3.05637e-05	CAF0006899		ORF Predicted by Annotation Working Group
orf19.1594	2.80925	0.000110147	CAL0005681		Predicted ORF from Assembly 19; possibly spurious ORF (Annotation Working Group prediction); merged with orf19.792 in Assembly 20
orf19.6645	2.80784	0.000253145	CAL0004040	HMO1	High mobility group-like protein; activatespseudohyphal growth when expressed in S. cerevisiae;decreased expression in hyphae compared to yeast-formcells; amphotericin B repressed
orf19.1832	2.79761	0.000115775	CAL0001652	FCY23	Putative transporter; Gcn4p-regulated; moresimilar to S. cerevisiae Tpn1p, which is a vitamin B6transporter, than to purine-cytosine permeases
orf19.300	2.79629	8.91202e-05	CAL0004623	AIP2	Protein described as an actin interactingprotein; regulated by Gcn4p; induced in response to aminoacid starvation (3-aminotriazole treatment)
orf19.491	2.79343	5.96255e-05	CAL0005862		Predicted ORF in Assemblies 19, 20 and 21
orf19.4991	2.78737	0.000208123	CAL0000028	MPT5	Protein induced during the mating process
orf19.2940	2.78505	0.00116562	CAL0006034		Predicted ORF in Assemblies 19, 20 and 21
orf19.3673	2.78465	0.000204927	CAL0000449		Predicted ORF in Assemblies 19, 20 and 21
orf19.7128	2.78405	0.000356743	CAL0002894	SYS1	Predicted ORF in Assemblies 19, 20 and 21;transcription is regulated by Mig1p
orf19.1991	2.78011	0.000302508	CAL0002738		Predicted ORF in Assemblies 19, 20 and 21
orf19.1394	2.77775	0.00030197	CAL0003971		Protein not essential for viability
orf19.1063	2.77337	0.00180553	CAL0001206		Predicted ORF in Assemblies 19, 20 and 21
orf19.7305	2.77024	0.000520166	CAL0004508		Predicted ORF in Assemblies 19, 20 and 21;possibly spurious ORF (Annotation Working Groupprediction)
orf19.7046	2.76163	7.06452e-05	CAL0002057	MET28	Protein induced during the mating process
orf19.2965	2.75423	0.000260821	CAL0006081		Predicted ORF in Assemblies 19, 20 and 21
orf19.7271	2.74902	3.73355e-05	CAL0003956		Predicted ORF in Assemblies 19, 20 and 21;possibly spurious ORF (Annotation Working Groupprediction)
orf19.6022	2.7379	2.94029e-05	CAL0005069		Predicted ORF in Assemblies 19, 20 and 21;downregulated during core stress response
orf19.759	2.73423	0.000158838	CAL0001871		Predicted ORF in Assemblies 19, 20 and 21
orf19.6294	2.72975	0.000145478	CAL0000620		Predicted ORF in Assemblies 19, 20 and 21
orf19.4897	2.71077	5.66704e-05	CAL0005528		Predicted ORF in Assemblies 19, 20 and 21
orf19.6169.2	2.70175	0.00104739	CAL0006076		Predicted ORF in Assemblies 19, 20 and 21;induced by Rgt1p
orf19.5244	2.69744	0.00989695	CAL0003557	MCD4	Protein of major facilitator superfamily; hasphosphodiesterase/nucleotide pyrophosphatase domain;similar to S. cerevisiae Mcd4p, which acts in GPI anchorbiosynthesis
orf19.231	2.69563	0.000219954	CAL0003949		Predicted ORF in Assemblies 19, 20 and 21
orf19.5027	2.69039	0.00281577	CAL0001621		Predicted ORF in Assemblies 19, 20 and 21
orf19.6683	2.68885	7.55834e-05	CAL0004131		Predicted ORF from Assembly 19; merged with orf19.6707 in Assembly 20
orf19.1059	2.68617	0.00094563	CAL0001194	HHF1	Putative histone H4; reduced mRNA in homozygousfkh2 null mutant; regulated by Efg1p; fluconazole induced;amphotericin B repressed; farnesol regulated; shows colonymorphology-related gene regulation by Ssn6p
orf19.2560	2.68467	5.38245e-05	CAL0002497	CDC60	Cytosolic leucyl tRNA synthetase; has conservedamino acid and ATP binding class I signature, tRNAbinding, and proofreading motifs; likely essential forgrowth, based on insertional mutagenesis strategy; similarto S. cerevisiae Cdc60p
orf19.3558	2.68372	0.000184036	CAL0005932		Predicted ORF in Assemblies 19, 20 and 21
orf19.2007	2.67537	0.000126156	CAL0004322		Predicted ORF in Assemblies 19, 20 and 21
orf19.5839	2.6655	5.94698e-05	CAL0002337	PDR17	Predicted ORF in Assemblies 19, 20 and 21;fungal-specific (no human or murine homolog)
orf19.4587	2.66156	0.000259985	CAL0002914	HGH1	Transcription is regulated by Mig1p
orf19.6803	2.64513	0.00276828	CAL0005612	HUT1	Predicted ORF in Assemblies 19, 20 and 21
orf19.6536	2.64273	0.00244989	CAL0003156		Predicted ORF in Assemblies 19, 20 and 21
orf19.6496	2.64096	0.00916398	CAL0002339	TRS33	Predicted ORF in Assemblies 19, 20 and 21;constitutive expression independent of MTL or white-opaquestatus
orf19.6849	2.63955	0.000161846	CAL0005776	ELC1	Transcription is regulated by Nrg1p and Mig1p;regulated by Gcn2p and Gcn4p
orf19.5648	2.63888	0.000290194	CAL0000647		Predicted ORF in Assemblies 19, 20 and 21
orf19.6707	2.63763	0.000249441	CAL0004713		Predicted ORF in Assemblies 19, 20 and 21;transcription is repressed in response to alpha pheromonein SpiderM medium
orf19.6026	2.6368	3.54878e-05	CAL0005073	ERG2	C-8 sterol isomerase; enzyme of ergosterolbiosynthesis pathway; converts fecosterol to episterol;mutant is hypersensitive to multiple drugs; ketoconazole-induced
orf19.2951	2.63647	0.000877702	CAL0006049	HOM6	Protein described as homoserine dehydrogenase;regulated by Gcn4p; induced in response to amino acidstarvation (3-aminotriazole treatment); macrophage-inducedprotein
orf19.3680	2.63493	7.73392e-05	CAL0000463	2008-09-07	Septin, required for wild-type invasive growthin vitro but not required for virulence in a mouse modelof systemic infection; localizes to hyphal septum or budneck; Asn-rich; aberrant gel mobility
orf19.3744	2.63076	7.177e-05	CAL0001199		Predicted ORF in Assemblies 19, 20 and 21
orf19.1760	2.62705	5.11896e-05	CAL0000896	RAS1	RAS signal transduction GTPase; regulates cAMPand MAP kinase pathways; role in hyphal induction,virulence, apoptosis, heat-shock sensitivity;nonessential; glutamine-rich C terminus; complementsviability of S. cerevisiae ras1 ras2 mutant
orf19.1186	2.62403	4.85442e-05	CAL0002131		Predicted ORF in Assemblies 19, 20 and 21;possibly spurious ORF (Annotation Working Groupprediction)
orf19.847	2.62257	0.000184036	CAL0002754	YIM1	Protein similar to protease of mitochondrialinner membrane; increased transcription is observed uponbenomyl treatment; macrophage-downregulated gene
orf19.1401	2.62129	3.72613e-05	CAL0004450	EAP1	Cell wall adhesin required for cell-celladhesion and biofilm formation; GPI anchored; Efg1p-regulated; suppresses polystyrene or cell adhesion,filamentation, invasive growth defects of S. cerevisiaeflo8 or flo11 mutant
orf19.6114	2.6189	0.000518034	CAL0005959		Predicted ORF in Assemblies 19, 20 and 21
orf19.5243	2.61393	9.42781e-05	CAL0003556	TRP3	Predicted ORF in Assemblies 19, 20 and 21;regulated by Gcn2p and Gcn4p
orf19.4922	2.6042	0.000192736	CAL0006252		Predicted ORF in Assemblies 19, 20 and 21
orf19.394	2.59811	0.000485835	CAL0004950		Predicted ORF in Assemblies 19, 20 and 21
orf19.5870	2.59712	4.1575e-05	CAL0002428	CTP1	Predicted ORF in Assemblies 19, 20 and 21;flucytosine induced; amphotericin B repressed, caspofunginrepressed
orf19.5375	2.57984	0.00395206	CAL0004379		Predicted ORF from Assembly 19; removed from Assembly 20
orf19.576	2.56635	0.00335323	CAL0000307	CTF8	Protein repressed during the mating process
orf19.2937	2.56476	9.06173e-05	CAL0006021	PMM1	Phosphomannomutase; enzyme of O- and N-linkedmannosylation; interconverts mannose-6-phosphate andmannose-l-phosphate; functional homolog of S. cerevisiaeSec53p; antigenic during murine systemic infection
orf19.5999	2.56135	0.000333291	CAL0003475	DYN1	Dynein heavy chain; dynein is a motor proteinthat moves toward the microtubule minus end; required forwild-type yeast-form cell separation, spindle positioning,nuclear migration, hyphal growth; transcription isregulated by Mig1p
orf19.3569	2.55738	0.000331817	CAL0005955		Predicted ORF in Assemblies 19, 20 and 21;constitutive expression independent of MTL or white-opaquestatus
orf19.2187	2.55428	4.80835e-05	CAL0005452	ALG7	Protein involved in cell wall mannanbiosynthesis; transcription is elevated in chk1, nik1, andsln1 homozygous null mutants
orf19.5768	2.55385	0.000723008	CAL0001497	SNF4	Protein similar to S. cerevisiae Snf4ptranscriptional regulator; caspofungin repressed;transposon mutation affects filamentous growth
orf19.6579	2.55315	0.000254919	CAL0003291		Predicted ORF in Assemblies 19, 20 and 21
orf19.5281	2.5525	6.19279e-05	CAL0003641		Predicted ORF in Assemblies 19, 20 and 21
orf19.4236	2.55094	0.000128203	CAL0000185	RET2	Protein that interacts with Crk1p in the two-hybrid system; potential ortholog of S. cerevisiae Ret2p
orf19.6756	2.55026	0.00050225	CAL0004894		Predicted ORF in Assemblies 19, 20 and 21
orf19.7328	2.54643	7.99795e-05	CAL0004580		Gene transcription regulated by Mig1p and Tup1p
orf19.6668	2.54273	4.75533e-05	CAL0004096		Predicted ORF in Assemblies 19, 20 and 21
orf19.1848.1	2.53587	5.90037e-05	CAF0006930		ORF Predicted by Annotation Working Group
orf19.393	2.53568	0.00105461	CAL0004948		Predicted ORF in Assemblies 19, 20 and 21
orf19.7489	2.53043	0.000122043	CAF0007125		ORF Predicted by Annotation Working Group
orf19.3174	2.52586	0.0045213	CAL0002395	CDC24	GDP-GTP exchange factor for Cdc42p;phosphorylated; required for maintenance of hyphal growth;misexpression blocks hyphal growth and causes avirulencein a mouse model of systemic infection; antigenic duringhuman oral infection
orf19.7095	2.52223	0.0114792	CAL0002197		Predicted ORF in Assemblies 19, 20 and 21
orf19.6843	2.52036	0.000337134	CAL0005761		Predicted ORF in Assemblies 19, 20 and 21
orf19.4940	2.51755	0.00935791	CAL0006299		Putative histidine permease; fungal-specific (nohuman or murine homolog)
orf19.4180	2.51476	0.00145377	CAL0005843		Protein described as component of ER protein-translocation complex; regulated by Gcn4p; repressed inresponse to amino acid starvation (3-aminotriazoletreatment)
orf19.4645	2.50899	7.59344e-05	CAL0003701	BEM1	Protein required for wild-type budding, hyphalgrowth, and virulence in a mouse systemic infection;suppresses pseudohyphal and filamentous growth defects ofvarious S. cerevisiae mutants and heat sensitivity of S.cerevisiae cdc24-4 mutant
orf19.3752	2.50818	0.000266878	CAL0001214	RAD51	Predicted ORF in Assemblies 19, 20 and 21;flucytosine induced
orf19.5938	2.48252	0.000125341	CAL0003335		Predicted ORF in Assemblies 19, 20 and 21
orf19.1843	2.48163	9.77357e-05	CAL0001676	ALG6	Putative glucosyltransferase involved in cellwall mannan biosynthesis; transcription is elevated inchk1, nik1, and sln1 homozygous null mutants; repressed bynitric oxide
orf19.6448	2.47954	0.000190729	CAL0002218		Predicted ORF in Assemblies 19, 20 and 21
orf19.2761	2.47926	0.000584531	CAL0004252		Predicted ORF in Assemblies 19, 20 and 21;induced by nitric oxide in yhb1 mutant; possibly spuriousORF (Annotation Working Group prediction)
orf19.1712	2.47103	0.000760379	CAL0000776	GEA2	Protein described as an ARF GTP/GDP exchangefactor; transcriptionally regulated by iron; expressiongreater in low iron
orf19.2799	2.46505	0.000798276	CAL0004308	GPI8	Protein likely to be essential for growth, basedon an insertional mutagenesis strategy; similar to S.cerevisiae Gpi8p, which is a subunit of the GPItransamidase complex that adds GPI anchors to proteins
orf19.3060	2.4612	0.000246906	CAL0001449		Predicted ORF in Assemblies 19, 20 and 21
orf19.3142	2.4511	0.00038916	CAL0002311		Predicted ORF in Assemblies 19, 20 and 21
orf19.4525	2.44873	0.000413783	CAL0002692		Predicted ORF in Assemblies 19, 20 and 21
orf19.5181	2.44714	0.000245179	CAL0002691	NIK1	Histidine kinase involved in a two-componentsignaling pathway that regulates cell wall biosynthesis;required for wild-type virulence in mouse systemicinfection but not for wild-type growth or drugsensitivity/resistance
orf19.649	2.44698	8.63864e-05	CAL0001014		Predicted ORF in Assemblies 19, 20 and 21
orf19.3430	2.4433	0.000698703	CAL0004951		Predicted ORF in Assemblies 19, 20 and 21;possibly spurious ORF (Annotation Working Groupprediction)
orf19.2663	2.44133	0.000162289	CAL0003492		Predicted ORF in Assemblies 19, 20 and 21
orf19.3173	2.43965	0.000205535	CAL0002393		Predicted ORF in Assemblies 19, 20 and 21
orf19.6538	2.43791	7.57027e-05	CAL0003162		Predicted ORF in Assemblies 19, 20 and 21
orf19.5941	2.43475	6.77985e-05	CAL0003347		Predicted ORF in Assemblies 19, 20 and 21
orf19.3899	2.43397	0.000109322	CAL0002207		Predicted ORF in Assemblies 19, 20 and 21
orf19.861	2.43359	0.00013326	CAL0002806		Predicted ORF in Assemblies 19, 20 and 21
orf19.1317	2.43143	0.000113667	CAL0003732	OSH3	Protein required for wild-type filamentation;has oxysterol binding protein domain and pleckstrinhomology motif; overproducton suppresses cph1 homozygousnull filamnetation defect; similar to S. cerevisiae Osh3p
orf19.2245	2.42469	0.0208393	CAL0006268		Predicted ORF in Assemblies 19, 20 and 21
orf19.5968	2.4234	6.98621e-05	CAL0003409	RDI1	Protein similar to S. cerevisiae Rdi1p, which isan inhibitor of Rho-GDP dissociation; transposon mutationaffects filamentous growth; filament induced; regulated byNrg1p, Tup1p
orf19.1701	2.41327	0.000648282	CAL0000757		Predicted ORF in Assemblies 19, 20 and 21
orf19.4521	2.40998	0.000492669	CAL0002684		Predicted ORF in Assemblies 19, 20 and 21;hyphal-induced expression
orf19.528	2.40276	0.000106354	CAL0000129		Predicted ORF in Assemblies 19, 20 and 21
orf19.7304	2.38934	0.000228316	CAL0004507		Predicted ORF in Assemblies 19, 20 and 21
orf19.3501	2.38777	0.000302508	CAL0005764		Predicted ORF in Assemblies 19, 20 and 21; Hog1p-downregulated
orf19.5925	2.38309	8.23207e-05	CAL0003301		Predicted ORF in Assemblies 19, 20 and 21
orf19.1630	2.38241	0.000188307	CAL0006396		Predicted ORF in Assemblies 19, 20 and 21
orf19.1621	2.38093	0.00016248	CAL0006364	GPA2	G-protein alpha subunit; regulates filamentousgrowth; reports differ on a role in cAMP-mediated glucosesignaling, cAMP-PKA pathway, MAP kinase cascade; Gpr1p Cterminus binds Gpa2p; regulates HWP1 and ECE1
orf19.7076	2.37923	0.000488153	CAL0002144		Predicted ORF in Assemblies 19, 20 and 21
orf19.7409	2.37407	0.000108102	CAF0007122		ORF Predicted by Annotation Working Group
orf19.5857	2.3643	0.00088891	CAL0002384		Predicted ORF in Assemblies 19, 20 and 21
orf19.4830	2.3629	8.87723e-05	CAL0005351		Predicted ORF in Assemblies 19, 20 and 21
orf19.7585	2.35986	0.000527334	CAL0000215	INO1	Inositol-1-phosphate synthase; enzyme ofinositol biosynthesis; antigenic in human; repressed byfarnesol (in biofilm) or caspofungin; regulated duringplanktonic growth; upstream inositol/choline regulatoryelement; glycosylation predicted
orf19.346	2.35938	0.000124424	CAL0004796		Predicted ORF in Assemblies 19, 20 and 21
orf19.4136	2.35726	0.000856332	CAL0005675	YBL053	Predicted ORF in Assemblies 19, 20 and 21; notessential for viability
orf19.2138	2.3541	0.000255359	CAL0005329	ILS1	Protein similar to isoleucyl-tRNA synthetase;isoleucyl-tRNA synthetase is the target of drugs includingthe cyclic beta-amino acid icofungipen/PLD-118/BAY-10-8888and mupirocin
orf19.4171	2.35147	0.000192332	CAL0005809		Predicted ORF in Assemblies 19, 20 and 21
orf19.2844	2.34833	0.000562222	CAL0005138		Predicted ORF in Assemblies 19, 20 and 21;induced in core caspofungin response
orf19.6308	2.34536	0.000619953	CAL0001238		Predicted ORF in Assemblies 19, 20 and 21
orf19.3001	2.33964	0.000155903	CAL0001322	TEM1	Protein similar to S. cerevisiae Tem1p, which isa GTPase involved in termination of the M phase of thecell cycle; induced under Cdc5p depletion
orf19.4704	2.33716	0.00827257	CAL0004346	ARO1	Putative pentafunctional arom enzyme; fungal-specific (no human or murine homolog); Gcn2p-, Gcn4p-regulated
orf19.6924	2.33707	0.000687951	CAL0000204	HTA1	Putative histone H2A; reduced mRNA abundancedetected in homozygous fkh2 null mutant; amphotericin Brepressed; farnesol regulated; RNA abundance regulated bytyrosol and cell density
orf19.2736	2.33654	0.000395693	CAL0004217		Predicted ORF in Assemblies 19, 20 and 21;flucytosine induced
orf19.1854	2.33512	0.00121268	CAL0001693	HHF22	Putative histone H4; regulated by Efg1p;flucytosine, fluconazole-induced; amphotericin B,caspofungin repressed; shows colony morphology-relatedgene regulation by Ssn6p
orf19.6778	2.3334	0.00013326	CAL0004962		Predicted ORF in Assemblies 19, 20 and 21
orf19.4811	2.32684	0.000303476	CAL0005311		Predicted ORF in Assemblies 19, 20 and 21
orf19.867	2.32499	0.00101367	CAL0002821		Predicted ORF in Assemblies 19, 20 and 21
orf19.5658	2.31158	9.4606e-05	CAL0000673	MNN10	Protein with similarity to mannosyltransferases;fungal-specific (no human or murine homolog)
orf19.30	2.31145	0.000394523	CAL0000546		Predicted ORF in Assemblies 19, 20 and 21
orf19.4255	2.30845	0.000113245	CAL0000259	ECM331	Putative GPI-anchored protein; caspofungininduced; Plc1p-regulated; repressed by Rim101p, Hog1p;shows colony morphology-related gene regulation by Ssn6p;increased mRNA abundance in cyr1 homozygous null mutantyeast-form cells
orf19.5654	2.30535	0.000149047	CAL0000665		Predicted ORF in Assemblies 19, 20 and 21
orf19.7645	2.30261	0.0015169	CAL0000887		Predicted ORF in Assemblies 19, 20 and 21
orf19.3846	2.30124	0.000138263	CAL0002066	LYS4	Protein described as homoaconitase; regulated byGcn4p, Gcn2p; induced in response to amino acid starvation(3-aminotriazole treatment); upregulated in the presenceof human whole blood or polymorphonuclear (PMN) cells
orf19.5238	2.30008	0.00010759	CAL0003543		Predicted ORF in Assemblies 19, 20 and 21
orf19.2739	2.29814	0.00194193	CAL0004223		Predicted ORF in Assemblies 19, 20 and 21
orf19.2837	2.29768	0.000102778	CAL0005117	ALG5	Putative glucosyltransferase involved in cellwall mannan biosynthesis
orf19.641	2.29636	0.000502867	CAL0001004		Predicted ORF in Assemblies 19, 20 and 21
orf19.1829	2.29605	0.00011525	CAL0001636		Predicted ORF from Assembly 19; merged with orf19.2663 in Assembly 20
orf19.7285	2.29528	0.00016866	CAL0003996		Predicted ORF in Assemblies 19, 20 and 21
orf19.2382	2.29257	0.0013766	CAL0000808		Predicted ORF in Assemblies 19, 20 and 21;similar to isoleucyl-tRNA synthetase; isoleucyl-tRNAsynthetase is the target of drugs including the cyclicbeta-amino acid icofungipen/PLD-118/BAY-10-8888 andmupirocin
orf19.7425	2.28909	0.000144283	CAL0005490		Predicted ORF in Assemblies 19, 20 and 21
orf19.3329	2.28414	0.00207277	CAL0004101		Predicted ORF in Assemblies 19, 20 and 21
orf19.273	2.28305	0.000131958	CAL0004059		Predicted ORF in Assemblies 19, 20 and 21
orf19.6257	2.28115	0.00017282	CAL0000516	GLT1	Alkaline downregulated
orf19.6073	2.27712	0.000338637	CAL0005187	HMX1	Heme oxygenase; acts in utilization of heminiron; gene transcriptionally activated by heat, low iron,or hemin; negatively regulated by Efg1p; expressiongreater in low iron; upregulated by Rim101p at pH 8
orf19.3462	2.27696	0.000337191	CAL0005033	SAR1	Functional homolog of S. cerevisiae Sar1p, whichis required for ER-to-Golgi protein transport; binds GTP;similar to small GTPase superfamily proteins; gene hasintron
orf19.2895	2.27279	0.000280109	CAL0005252	VMA8	Protein similar to the S. cerevisiae Vma8psubunit of vacuolar H+-ATPase; transcription is regulatedby Nrg1p and Mig1p; transcription is increased inpopulations of cells exposed to fluconazole over multiplegenerations
orf19.2272	2.26679	0.000412008	CAL0006340		Predicted ORF in Assemblies 19, 20 and 21
orf19.3225	2.26344	0.000567291	CAL0003256		Predicted ORF in Assemblies 19, 20 and 21
orf19.1273	2.2608	0.000195979	CAL0003018		Predicted ORF in Assemblies 19, 20 and 21
orf19.5013	2.25855	0.000382436	CAL0001593	AGM1	Phosphoacetylglucosamine mutase (N-acetylglucosamine-phosphate mutase); enzyme of UDP-N-acetylglucosamine (UDP-GlcNAc) biosynthesis
orf19.7141	2.25624	0.00015713	CAL0002968	UFE1	Protein interacting with Sec20p, possiblyinvolved in retrograde transport between the Golgi and theendoplasmic reticulum; functional homolog of S. cerevisiaeUfe1p, which is an ER t-SNARE that mediates the retrogradetraffic
orf19.4937	2.25604	0.000411569	CAL0006283	CHS3	Major chitin synthase of yeast-form and hyphalcells; Chs4p-activated; required for wild-type wall chitincontent; transcription induced at yeast-hyphal transition;Chs1p and Chs2p, but not Chs3p, are inhibited by theprotoberberine HWY-289
orf19.198	2.25033	0.000344756	CAL0003290	ASN1	Protein described as asparagine synthetase;soluble protein in hyphae; regulated by Rim101p; decreasedexpression at pH 4 compared to pH 8
orf19.3722	2.24963	0.00681596	CAL0001135		Predicted ORF in Assemblies 19, 20 and 21
orf19.5964	2.24893	0.000548213	CAF0007060	RPL35	Protein described as a ribosomal protein;downregulation correlates with clinical development offluconazole resistance; shows colony morphology-relatedgene regulation by Ssn6p
orf19.7116	2.24843	0.000813035	CAL0002849		Predicted ORF in Assemblies 19, 20 and 21
orf19.1031	2.24646	0.000179829	CAL0001113	HMG1	HMG-CoA reductase; enzyme of sterol pathway;inhibited by lovastatin; gene not transcriptionallyregulated in response to lovastatin and fluconazole
orf19.6509	2.24632	0.000167763	CAL0003046		Predicted ORF in Assemblies 19, 20 and 21
orf19.6925	2.24516	0.00633052	CAL0000206	HTB1	Putative histone H2B; induced upon adherence topolystyrene; amphotericin B or caspofungin repressed;flucytosine or fluconazole induced; regulated by Efg1p
orf19.7327	2.23998	0.00103728	CAL0004579	PHO88	Putative role in phosphate transport; biofilm-regulated expression; amphotericin B repressed
orf19.1964	2.23775	0.01294	CAL0002636		Decreased transcription is observed uponfluphenazine treatment; increased transcription isobserved upon benomyl treatment; regulated by Nrg1p,Tup1p
orf19.4718	2.23487	0.000161846	CAL0004378	TRP5	Predicted tryptophan synthase; Gcn4p-regulated;upregulated in biofilm; identified in detergent-resistantmembrane fraction (possible lipid raft component);predicted N-terminal acetylation; S. cerevisiae orthologis Gcn4p regulated
orf19.6170	2.22965	0.000129107	CAL0006089		Predicted ORF in Assemblies 19, 20 and 21
orf19.3216	2.22839	0.00289857	CAL0003227		Similar to Rab GTPase activators
orf19.1160	2.22744	0.000182644	CAL0002067		Predicted ORF in Assemblies 19, 20 and 21
orf19.4765	2.22678	0.00204609	CAL0004519	PGA6	Putative GPI-anchored cell-wall protein ofunknown function; similar to S. cerevisiaeCcw12p/Ylr110cp; transcriptionally regulated by iron;expression greater in high iron; upregulated upon Als2pdepletion
orf19.3175	2.22636	0.00118111	CAL0002397		Predicted ORF in Assemblies 19, 20 and 21;alkaline downregulated; repressed by nitric oxide
orf19.2351	2.22332	0.000152948	CAL0000749	NIT3	Predicted ORF in Assemblies 19, 20 and 21;regulated by Gcn2p and Gcn4p
orf19.3474	2.2215	0.000305902	CAL0005060	IPL1	Predicted ORF in Assemblies 19, 20 and 21;induced during planktonic growth
orf19.1999	2.21868	0.000360294	CAL0002746		Predicted ORF in Assemblies 19, 20 and 21
orf19.6713	2.21834	0.00776403	CAL0004746		Predicted ORF in Assemblies 19, 20 and 21
orf19.4646	2.21754	0.000238167	CAL0003703		Predicted ORF in Assemblies 19, 20 and 21
orf19.292	2.21677	0.000564757	CAL0004106		Predicted ORF in Assemblies 19, 20 and 21
orf19.6021	2.21417	0.00404292	CAL0005068	IHD2	Transcriptionally regulated by iron and by yeast-hyphal switching; expression greater in low iron
orf19.1244	2.20742	9.0289e-05	CAL0002915	GYP2	Predicted ORF in Assemblies 19, 20 and 21
orf19.1897	2.20481	0.0078416	CAL0001829		Predicted ORF in Assemblies 19, 20 and 21
orf19.2166	2.20142	0.000885298	CAL0005394		Predicted ORF in Assemblies 19, 20 and 21
orf19.4341	2.20027	0.000723149	CAL0001012		Predicted ORF in Assemblies 19, 20 and 21
orf19.3467	2.2001	0.000344756	CAL0005039		Predicted ORF in Assemblies 19, 20 and 21
orf19.7382	2.19735	0.000624771	CAL0004797	CAM1	Putative translation elongation factor eEF1gamma
orf19.6177	2.19705	0.000338637	CAL0006100		Predicted ORF in Assemblies 19, 20 and 21;possibly spurious ORF (Annotation Working Groupprediction)
orf19.1414	2.19383	0.00118486	CAL0004484		Predicted ORF in Assemblies 19, 20 and 21;possibly spurious ORF (Annotation Working Groupprediction)
orf19.1107	2.19318	0.00244721	CAL0001857		Predicted ORF in Assemblies 19, 20 and 21
orf19.7312	2.19099	0.000520166	CAL0004537	ERG13	Protein similar to S. cerevisiae Erg13p, whichis involved in ergosterol biosynthesis; transposonmutation affects filamentous growth; amphotericin B,caspofungin repressed
orf19.815	2.18939	0.000352208	CAL0002646		Predicted ORF in Assemblies 19, 20 and 21;similar to S. cerevisiae Ylr422wp; transposon mutationaffects filamentous growth; regulated by Nrg1p
orf19.2542	2.18911	0.000158929	CAL0002460		Predicted ORF in Assemblies 19, 20 and 21
orf19.923	2.18867	0.00056217	CAL0003628	THR1	Putative homoserine kinase; fungal-specific (nohuman or murine homolog); transcription is regulated byTup1p; amphotericin B repressed; regulated by Gcn2p andGcn4p
orf19.2101	2.18688	0.000207118	CAL0005262		Predicted ORF in Assemblies 19, 20 and 21
orf19.2204.2	2.18009	0.00105461	CAL0006171		Predicted ORF in Assemblies 19, 20 and 21
orf19.374	2.17968	0.012733	CAL0004888		Predicted ORF in Assemblies 19, 20 and 21
orf19.7052	2.17594	0.000501675	CAL0002079		Predicted ORF in Assemblies 19, 20 and 21
orf19.390	2.1716	0.000128329	CAL0004942	CDC42	Rho-type GTPase; required for budding andmaintenance of hyphal growth; GGTase I geranylgeranylated;misexpression blocks hyphal growth, causes avirulence inmouse IV infection; shows actin-dependent localization tohyphal tip
orf19.4865	2.16963	0.000123379	CAL0005434		Predicted ORF in Assemblies 19, 20 and 21
orf19.4959	2.16927	0.00128456	CAL0006339		Predicted ORF in Assemblies 19, 20 and 21
orf19.6435	2.16856	0.000190984	CAL0002190		Predicted ORF in Assemblies 19, 20 and 21
orf19.4945	2.16596	0.000856332	CAL0006305	MSH6	Protein similar to S. cerevisiae Msh6p, which isinvolved in mismatch repair; repressed under Cdc5pdepletion
orf19.4606	2.16452	0.00045953	CAL0003589	ERG8	Putative phosphomevalonate kinase; enzyme of themevalonate pathway of isoprenoid biosynthesis;transcription is regulated by Nrg1p; possible drug target,not conserved in H. sapiens
orf19.405	2.16436	0.00075173	CAL0005539	VCX1	Putative H+/Ca2+ antiporter; fungal-specific (nohuman or murine homolog)
orf19.1672	2.15993	0.000807369	CAL0000105		Predicted ORF in Assemblies 19, 20 and 21
orf19.685	2.15899	0.00244721	CAL0001136	YHM1	Putative mitochondrial carrier protein; fungal-specific (no human or murine homolog)
orf19.7586	2.15837	0.000558398	CAL0000219	CHT3	Chitinase, major; functional homolog of S.cerevisiae Cts1p; 4 N-glycosylation motifs; possible O-mannosylated region; putative signal peptide; hyphal-repressed; farnesol upregulated in biofilm; regulated byEfg1p, Cyr1p, Ras1p
orf19.6994	2.15524	0.00014391	CAL0000414	BAT22	Protein described as a branched chain amino acidaminotransferase; regulated by Gcn4p; induced in responseto amino acid starvation (3-aminotriazole treatment)
orf19.2216	2.15501	0.00264688	CAL0006191		Predicted ORF in Assemblies 19, 20 and 21
orf19.2239	2.15419	0.000785486	CAL0006249		Predicted ORF from Assembly 19; merged with orf19.2238 in Assembly 20
orf19.2697	2.14829	0.000469432	CAL0003551		Predicted ORF in Assemblies 19, 20 and 21
orf19.2988	2.14682	0.000188307	CAL0006134		Predicted ORF in Assemblies 19, 20 and 21
orf19.5325	2.14593	0.00772263	CAL0004280	KIN3	Protein similar to S. cerevisiae Kin3p; inducedunder Cdc5p depletion
orf19.3769	2.14582	0.0123713	CAL0001249		Predicted ORF in Assemblies 19, 20 and 21
orf19.2257	2.13789	0.000153279	CAL0006296		Predicted ORF in Assemblies 19, 20 and 21
orf19.334	2.13348	0.000134183	CAL0004747		Predicted ORF in Assemblies 19, 20 and 21
orf19.1683	2.13239	0.00150024	CAL0000149	PPH21	Predicted ORF in Assemblies 19, 20 and 21;caspofungin repressed
orf19.944	2.1299	0.00134978	CAL0003688	IFG3	Putative D-amino acid oxidase
orf19.3496	2.12968	0.000670534	CAL0005122		Predicted ORF in Assemblies 19, 20 and 21
orf19.4145	2.1283	0.000132849	CAL0005716		Predicted zinc-finger protein of unknownfunction
orf19.610	2.12792	0.000621047	CAL0000906	EFG1	Transcriptional repressor; required for white-phase cell type; hyphal growth, metabolism, cell-wall generegulator; roles in adhesion, virulence; Cph1p and Efg1phave role in host cytokine response; bHLH; binds E-box;T206 phosphorylated
orf19.719	2.12602	0.000238167	CAL0001749		Predicted ORF in Assemblies 19, 20 and 21
orf19.1342	2.12573	0.000357414	CAL0003822	SHM1	Mitochondrial serine hydroxymethyltransferase;complements the glycine auxotrophy of an S. cerevisiaeshm1 null shm2 null gly1-1 triple mutant
orf19.4044	2.12344	0.00361763	CAL0004813	MUM2	Protein similar to &lt;i&gt;S. cerevisiae&lt;/i&gt; Mum2p;transcription is induced in response to alpha pheromone inSpiderM medium; transcription is regulated by Tup1p
orf19.1536	2.12338	0.000294648	CAL0005476		Predicted ORF in Assemblies 19, 20 and 21
orf19.522	2.12311	0.004854	CAL0000116		Predicted ORF in Assemblies 19, 20 and 21
orf19.5817	2.12271	0.0017785	CAL0002279		Predicted ORF in Assemblies 19, 20 and 21
orf19.3076	2.12073	0.00126616	CAL0001485		Predicted ORF in Assemblies 19, 20 and 21
orf19.7163	2.1202	0.000200608	CAL0003040		Predicted ORF in Assemblies 19, 20 and 21;possibly spurious ORF (Annotation Working Groupprediction)
orf19.3166	2.11739	0.000247897	CAL0002369		Predicted ORF in Assemblies 19, 20 and 21
orf19.898	2.11432	0.00108539	CAL0002938	HEM2	Protein described as porphobilinogen synthase;transcriptionally regulated by iron; expression greater inhigh iron
orf19.5467	2.11264	0.000879552	CAL0005302	TLO7	Member of a family of telomere-proximal genes ofunknown function; may be spliced in vivo
orf19.783	2.10513	0.00969321	CAL0001981		Predicted ORF in Assemblies 19, 20 and 21
orf19.6701	2.10503	0.000193105	CAL0004698		Predicted ORF in Assemblies 19, 20 and 21
orf19.7224	2.1049	0.00890799	CAL0003803		Predicted ORF in Assemblies 19, 20 and 21
orf19.4009	2.10414	0.000655143	CAL0004650	CNB1	Regulatory subunit of calcineurin B (Ca[2+]-calmodulin-regulated S/T protein phosphatase); requiredfor wild-type resistance to fluconazole or to SDS
orf19.7544	2.10215	0.000718763	CAL0000053	TLO1	Member of a family of telomere-proximal genes ofunknown function; hyphal-induced expression
orf19.782	2.09507	0.000598892	CAL0001978		Predicted ORF in Assemblies 19, 20 and 21
orf19.5480	2.09377	0.000990687	CAL0005334	ILV1	Protein described as threonine dehydratase;regulated by Gcn4p and Gcn2p; induced in response to aminoacid starvation (3-aminotriazole treatment)
orf19.5322	2.09157	0.000392333	CAL0004278		Predicted ORF in Assemblies 19, 20 and 21
orf19.3825	2.09148	0.00980737	CAL0001992	RCE1	Protein induced during the mating process
orf19.4845	2.09009	0.00025908	CAL0005379		Predicted ORF in Assemblies 19, 20 and 21;fluconazole-induced
orf19.1514	2.08842	0.000330155	CAL0005407		Predicted ORF in Assemblies 19, 20 and 21
orf19.3930	2.08656	0.000376943	CAL0002925	YUH2	Predicted ORF in Assemblies 19, 20 and 21;described as similar to ubiquitin carboxyl-terminalhydrolases
orf19.7578	2.08621	0.000430994	CAL0000182		Predicted ORF in Assemblies 19, 20 and 21
orf19.4933	2.08551	0.00137911	CAL0006277	FAD3	Omega-3 fatty acid desaturase, involved inproduction of alpha-linolenic acid, which is a majorcomponent of membranes; caspofungin induced; Plc1p-regulated; shows colony morphology-related gene regulationby Ssn6p
orf19.5650	2.08521	0.000549662	CAL0000661	PRO3	Protein induced during the mating process;alkaline upregulated
orf19.7383	2.08225	0.0010309	CAL0004800	MNN9	Protein of N-linked outer-chain mannanbiosynthesis; mutant has defective cell wall; required forwild-type hyphal growth; mutant is hygromycin B sensitiveand vanadate resistant; has N-terminal membrane-spanningsegment (positions 18-34)
orf19.5255	2.08218	0.00142624	CAL0003568	PXA2	Putative peroxisomal, half-sizeadrenoleukodystrophy protein (ALD or ALDp) subfamily ABCtransporter; Gcn4p-regulated
orf19.2378	2.08143	0.000240319	CAL0000790		Predicted ORF in Assemblies 19, 20 and 21
orf19.3083	2.08046	0.00210006	CAL0001501		Predicted ORF in Assemblies 19, 20 and 21
orf19.6749	2.08017	0.00046528	CAL0004871	KRS1	Putative tRNA-Lys synthetase; genes encodingribosomal subunits, translation factors, and tRNAsynthetases are downregulated upon phagocytosis by murinemacrophage
orf19.2864	2.07814	0.000492669	CAF0006966	RPL28	Putative ribosomal protein; Plc1p-regulated;genes encoding cytoplasmic ribosomal subunits, translationfactors, and tRNA synthetases are downregulated uponphagocytosis by murine macrophage
orf19.6169	2.07811	0.000578817	CAL0006076		Predicted ORF in Assemblies 19, 20 and 21; induced by Rgt1p
orf19.837	2.07741	0.000347754	CAL0002717	GNA1	Glucosamine-6-phosphate acetyltransferase;enzyme of UDP-GlcNAc biosynthesis; required for viabilityin absence of GlcNAc supplementation; required forpersistent infection and wild-type virulence in mousesystemic infection
orf19.4060	2.07291	0.000285096	CAL0004867	ARO4	3-Deoxy-D-arabinoheptulosonate-7-phosphatesynthase; enzyme of aromatic amino acid biosynthesis; GCN-regulated; feedback-inhibited by tyrosine when produced inS. cerevisiae; fungal-specific; Aro3p and Aro4p catalyzethe same reaction
orf19.5514	2.07256	0.00779019	CAL0006090		Predicted ORF in Assemblies 19, 20 and 21
orf19.4650	2.06628	0.00140507	CAL0003717	ILV6	Putative regulatory subunit of acetolacetatesynthase ; fungal-specific (no human or murine homolog);alkaline upregulated; regulated by Gcn2p and Gcn4p
orf19.3920	2.06511	0.000324335	CAL0002895		Predicted ORF in Assemblies 19, 20 and 21
orf19.5171	2.06275	0.000947033	CAL0002654	PMT1	Protein mannosyltransferase, required forvirulence in mouse systemic infection and for adhesion toepithelial cells; has a role in hyphal growth and drugsensitivity; Als1p, Sec20p, Kre9p, Pir1p are substrates;one of 5 PMT family members
orf19.3411	2.05888	0.0385126	CAL0004890		Predicted ORF in Assemblies 19, 20 and 21
orf19.1535	2.05836	0.0018444	CAL0005474		Predicted ORF in Assemblies 19, 20 and 21;possibly spurious ORF (Annotation Working Groupprediction)
orf19.5779	2.0581	0.000281372	CAL0001524	RNR1	Protein similar S. cerevisiae Rnr1p, largesubunit of ribonucleotide reductase; expression greater inlow iron; transposon mutation affects filamentous growth;farnesol upregulated in biofilm; regulated by tyrosol andcell density
orf19.6855	2.05721	0.000229225	CAL0005799		Predicted ORF in Assemblies 19, 20 and 21
orf19.7368	2.05716	0.00014459	CAL0004726		Predicted ORF in Assemblies 19, 20 and 21
orf19.6438	2.05689	0.00015713	CAL0002196		Predicted ORF in Assemblies 19, 20 and 21
orf19.3419	2.05326	0.00596507	CAL0004908	MAE1	Malic enzyme, mitochondrial; transcriptionregulated by Mig1p and Tup1p; shows colony morphology-related gene regulation by Ssn6p
orf19.2970	2.05101	0.000432374	CAL0006102	LYS2	Large subunit of heterodimeric alpha-aminoadipate reductase; enzyme of lysine biosynthesis;contains predicted binding sites for AMP and alpha-aminoadipate; feedback inhibited by lysine or thialysine;regulated by Gcn2p and Gcn4p
orf19.7522	2.04848	0.000203606	CAL0000002		Predicted ORF in Assemblies 19, 20 and 21
orf19.676	2.04835	0.000182602	CAL0001099		Predicted ORF in Assemblies 19, 20 and 21
orf19.5665	2.04823	0.0010069	CAL0000693		Predicted ORF in Assemblies 19, 20 and 21
orf19.4288	2.04699	0.0104527	CAL0000360	CTA7	Predicted zinc-finger protein of unknownfunction; activates transcription in 1-hybrid assay in S.cerevisiae; has similarity to S. cerevisiae Stb4p
orf19.4055	2.04389	0.000216103	CAL0004847		Protein similar to S. cerevisiae Ybr075wp;transposon mutation affects filamentous growth
orf19.437	2.04344	0.00167851	CAL0005660	GRS1	Putative tRNA-Gly synthetase; genes encodingribosomal subunits, translation factors, and tRNAsynthetases are downregulated upon phagocytosis by murinemacrophage
orf19.2919	2.04319	0.000249441	CAL0005976	MPH1	Protein similar to S. cerevisiae Mph1p, which isa DNA helicase involved in DNA repair; induced underhydroxyurea treatment
orf19.1613	2.04302	0.000869463	CAL0006335	ILV2	Protein described as acetolactate synthase;regulated by Gcn4p; induced in response to amino acidstarvation (3-aminotriazole treatment)
orf19.5917.3	2.04295	0.00197669	CAL0003274	STP3	Transcription factor; regulates SAP2, OPT1expression and thereby protein catabolism for nitrogensource; activated via amino-acid-induced proteolyticprocessing; macrophage/pseudohyphal-repressed
orf19.6643	2.03316	0.00120537	CAL0004034	MCT1	Putative malonyl-CoA acyl carrier proteinacyltransferase
orf19.2843	2.02965	0.000337557	CAL0005137	RHO1	Small GTPase of Rho family; regulates beta-1,3-glucan synthesis activity and binds Gsc1p; essential;expected to be geranylgeranylated bygeranylgeranyltransferase type I
orf19.6553	2.02576	0.000388461	CAL0003209		Predicted ORF in Assemblies 19, 20 and 21
orf19.4421	2.02445	0.0157154	CAL0001778		Processing alpha glucosidase I, involved in N-linked protein glycosylation and assembly of cell wall beta 1,6 glucan; merged with orf19.4719 in Assembly 20
orf19.4829	2.0235	0.000653303	CAL0005343	DOA1	Protein with WD-repeats and a mellitin-likesequence, similar to &lt;i&gt;S. cerevisiae&lt;/i&gt; Doa1p, which isinvolved in ubiquitin-mediated protein degradation
orf19.2051	2.02153	0.000938519	CAL0004433		Predicted ORF in Assemblies 19, 20 and 21
orf19.4040	2.01263	0.000981362	CAL0004803	ILV3	Putative dihydroxyacid dehydratase; fungal-specific (no human or murine homolog); upregulated inbiofilm; S. cerevisiae ortholog is Gcn4p regulated;repressed by nitric oxide; macrophage-induced protein
orf19.4726	2.01222	0.00437236	CAL0004401		Predicted ORF in Assemblies 19, 20 and 21
orf19.6118	2.01044	0.000182063	CAL0005963		Predicted ORF in Assemblies 19, 20 and 21
orf19.3710	2.00823	0.00530416	CAL0001093	YHB5	Protein related to flavohemoglobins; notrequired for wild-type nitric oxide resistance; haspredicted globin, FAD-binding, and NAD(P)-binding domainsbut lacks some conserved residues of flavohemoglobins;mRNA detected; filament induced
orf19.4643	2.00772	0.000206584	CAL0003698		Predicted ORF in Assemblies 19, 20 and 21
orf19.5345	2.00738	0.000171568	CAL0004315		Predicted ORF in Assemblies 19, 20 and 21;induced by nitric oxide in yhb1 mutant
orf19.2891	2.00291	0.00932783	CAL0005244		Predicted ORF in Assemblies 19, 20 and 21
orf19.3548	2.00273	0.000420458	CAF0006989	WH11	Cytoplasmic protein expressed specifically inwhite phase yeast-form cells; expression in opaque cellsincreases virulence and frequency of opaque-to-whiteswitching; null mutant shows wild-type switching; similarto S. cerevisiae Hsp12p
orf19.5693	1.99966	0.000575258	CAL0000746		Predicted ORF in Assemblies 19, 20 and 21
orf19.6190	1.99677	0.000219848	CAL0006140	SRB1	Essential GDP-mannose pyrophosphorylase;synthesizes GDP-mannose for protein glycosylation;functional homolog of S. cerevisiae Psa1p; at surface ofyeast-form, not hyphal, cells; alkaline upregulated;induced on adherence to polystyrene
orf19.2706	1.99663	0.00211312	CAL0004169	CRH11	Putative ortholog of S. cerevisiae Crh1p;predicted glycosyl hydrolase domain; similar to Csf4p, toantigenic Aspergillus fumigatus Aspf9; predicted Kex2psubstrate; putative GPI-anchor; localizes to cell wall,caspofungin-induced
orf19.4002	1.99573	0.00107218	CAL0004640	DUN1	Protein similar to S. cerevisiae Dun1p, which isa serine-threonine protein kinase involved in DNA damagecell-cycle checkpoint; induced under Cdc5p depletion
orf19.7111	1.99565	0.000502867	CAF0007264	SOD3	Cytosolic manganese-containing superoxidedismutase, involved in protection against oxidativestress; transcription downregulated by treatment withciclopirox olamine, induced during stationary phase whenSOD1 expression is repressed
orf19.4014	1.99548	0.0331025	CAL0004680		Predicted ORF in Assemblies 19, 20 and 21;described as similar to S. cerevisiae Cdc1p; induced uponadherence to polystyrene
orf19.4311	1.99494	0.000253587	CAL0000917	YNK1	Nucleoside diphosphate kinase (NDP kinase); homo-hexameric; soluble protein in hyphae; flucytosine induced;macrophage-induced protein
orf19.7428	1.99461	0.00118111	CAL0005493	APN1	Protein described as AP endonuclease;transcriptionally induced by interaction with macrophage;fungal-specific (no human or murine homolog)
orf19.1052	1.98923	0.00542334	CAL0001185		Predicted histone H2B
orf19.631	1.9886	0.0014771	CAL0000970		Predicted ORF from Assembly 19; merged with orf19.2661 in Assembly 20
orf19.6905	1.98499	0.0042711	CAL0000122		Predicted ORF in Assemblies 19, 20 and 21
orf19.6712	1.98498	0.00025867	CAL0004744		Predicted ORF in Assemblies 19, 20 and 21
orf19.3802	1.98353	0.000238662	CAL0001900	PMT6	Protein mannosyltransferase, required forvirulence in mouse systemic infection and for adhesion toendothelium; has a role in hyphal growth signaling andhygromycin B sensitivity; not a major contributor tooverall cellular PMT activity
orf19.2960	1.98118	0.000200389	CAL0006075	FRS2	Putative tRNA-Phe synthetase; genes encodingribosomal subunits, translation factors, and tRNAsynthetases are downregulated upon phagocytosis by murinemacrophage
orf19.6191	1.98082	0.000567294	CAL0006142	TLO8	Member of a family of telomere-proximal genes ofunknown function; may be spliced in vivo
orf19.7298	1.9785	0.00181093	CAL0004026	CHS2	Chitin synthase; nonessential; required for wild-type chitin deposition in hyphae; transcription isregulated during dimorphic transition; Chs1p and Chs2p,but not Chs3p, are inhibited by the protoberberine HWY-289; fungal-specific
orf19.7370	1.978	0.00249229	CAL0004748		Predicted ORF in Assemblies 19, 20 and 21
orf19.2250	1.97651	0.000187775	CAL0006284		Predicted ORF in Assemblies 19, 20 and 21
orf19.5561	1.97607	0.00194211	CAL0006201	RAV2	Protein similar to S. cerevisiae Rav2p, which isinvolved in acidification of the vacuole; transposonmutation affects filamentous growth
orf19.284	1.97427	0.0013877	CAL0004085		Predicted ORF in Assemblies 19, 20 and 21
orf19.4054	1.97386	0.000912911	CAL0004845	CTA24	Putative transcriptional activator,downregulated by Efg1p; member of a family of telomere-proximal genes
orf19.3273	1.97385	0.000279207	CAL0003387		Predicted ORF in Assemblies 19, 20 and 21
orf19.7523	1.96812	0.00147202	CAL0000003	MKC1	MAP kinase; role in biofilm formation, contact-induced invasive filamentation, systemic virulence inmouse, cell wall structure/maintenance, caspofunginresponse; phosphorylated on surface contact, membraneperturbation, or cell wall stress
orf19.269	1.96801	0.000188307	CAL0004049	SES1	Seryl-tRNA synthetase; charges the tRNA thatrecognizes the CUG codon, which typically specifies Leu,but specifies Ser in C. albicans; complements S.cerevisiae ses1 mutant viability; soluble protein inhyphae; macrophage-regulated
orf19.2087	1.96729	0.00210531	CAL0004532		Predicted ORF in Assemblies 19, 20 and 21
orf19.7078	1.96521	0.00189067	CAL0002146		Predicted ORF in Assemblies 19, 20 and 21
orf19.2088	1.96482	0.000241856	CAL0004533		Predicted ORF in Assemblies 19, 20 and 21
orf19.3322	1.96427	0.000350908	CAL0004091	DUT1	dUTP pyrophosphatase; converts dUTP to dUMP andpyrophosphate; cell-cycle regulated if expressed in S.cerevisiae; upstream MluI and SCB transcription regulatoryelements; induced by 17-beta-estradiol, ethynyl estradiol,macrophage
orf19.2506	1.9634	0.00377866	CAL0002364		Predicted ORF in Assemblies 19, 20 and 21;opaque-specific transcription; Hog1p-downregulated
orf19.4201	1.96332	0.000305596	CAL0000054	NHX1	Protein similar to &lt;i&gt;S. cerevisiae&lt;/i&gt; Nhx1p,which is an Na+/H+ exchanger required for intracellularsequestration of Na+
orf19.1161	1.96236	0.000278219	CAL0002069	PLD1	Phospholipase D1; required for phosphatidic acidand for most diacylglycerol production; required for wild-type mouse virulence, but not rat oral virulence; mutantdefect in hyphal growth on solid substrates; similar to S.cerevisiae Spo14p
orf19.663	1.96113	0.00173276	CAL0001054	GIN4	Kinase involved in pseudohyphal-to-hyphalswitch; phosphorylates Cdc11p on S395 (regulatory);autophosphorylates; necessary for septin ring within germtube, but not for septin band at mother cell junction;role in cytokinesis
orf19.3592	1.9601	0.00136969	CAL0006020		Predicted ORF in Assemblies 19, 20 and 21
orf19.3247	1.95865	0.000728424	CAL0003321		Predicted ORF in Assemblies 19, 20 and 21;putative ortholog of S. cerevisiae Yjl207cp; likely to beessential for growth, based on an insertional mutagenesisstrategy
orf19.7025	1.95791	0.000560914	CAL0001975	MCM1	Putative transcription factor with MADS domainDNA-binding motif; regulator of hyphal growth; similar toS. cerevisiae Mcm1p; greater expression in white than inopaque phase cells; intron in 5'-UTR
orf19.4036	1.95747	0.000285567	CAL0004774	APM1	Protein similar to S. cerevisiae Apm1, which isinvolved in vesicle transport; transposon mutation affectsfilamentous growth
orf19.5444	1.95627	0.000531349	CAL0005261		Predicted ORF in Assemblies 19, 20 and 21
orf19.1332	1.95612	0.0308908	CAL0003788		Predicted ORF in Assemblies 19, 20 and 21
orf19.6893	1.95598	0.00906602	CAL0005917		Predicted ORF in Assemblies 19, 20 and 21
orf19.4496	1.9536	0.000552514	CAL0002043		Predicted ORF in Assemblies 19, 20 and 21
orf19.2573	1.95349	0.000382436	CAL0002521	FRS1	Protein similar to the beta subunit of S.cerevisiae phenylalanyl-tRNA synthetase; possible role inearly cell wall biosynthesis; translation-related genesare downregulated upon phagocytosis by murine macrophage
orf19.2209	1.95163	0.00129439	CAL0006175	YVC1	Protein similar to &lt;i&gt;S. cerevisiae&lt;/i&gt; Yvc1p;transcription is repressed in response to alpha pheromonein SpiderM medium
orf19.2660	0.549727	0.0014677	CAL0003490		Predicted ORF in Assemblies 19, 20 and 21
orf19.3004	0.549138	0.00146187	CAL0001328		Predicted ORF in Assemblies 19, 20 and 21
orf19.1304	0.548638	0.0101261	CAL0003704		Predicted ORF in Assemblies 19, 20 and 21
orf19.1566	0.548424	0.000401347	CAL0005566		Predicted ORF in Assemblies 19, 20 and 21
orf19.4203	0.547819	0.00306909	CAL0000057		Predicted ORF in Assemblies 19, 20 and 21
orf19.5136	0.547759	0.00813075	CAL0002553		Predicted ORF in Assemblies 19, 20 and 21
orf19.5207	0.547309	0.000416527	CAL0003487		Predicted ORF in Assemblies 19, 20 and 21
orf19.980	0.546916	0.000935991	CAL0003805		Predicted ORF in Assemblies 19, 20 and 21
orf19.2830	0.54629	0.001614	CAL0005106		Predicted ORF in Assemblies 19, 20 and 21
orf19.4928	0.545916	0.000389388	CAL0006259		Predicted ORF in Assemblies 19, 20 and 21
orf19.4281	0.545477	0.00211312	CAL0000347		Predicted ORF in Assemblies 19, 20 and 21
orf19.1010	0.545256	0.000458955	CAL0001038	MNT3	Protein with similarity to mannosyltransferases;transcription is elevated in cyr1, chk1, nik1, and sln1homozygous null mutants; fungal-specific (no human ormurine homolog)
orf19.4328	0.545221	0.0121864	CAL0000959	CCC2	Copper-transporting P-type ATPase of Golgi;required for wild-type iron assimilation (indirect effectvia Fet3p); induced by iron starvation, ciclopiroxolamine; caspofungin repressed; not required for virulencein mouse systemic infection
orf19.83	0.545076	0.00105361	CAL0000680		Predicted ORF from Assembly 19; removed from Assembly 20
orf19.4375	0.544613	0.00652258	CAF0007010	RPS30	ORF Predicted by Annotation Working Group;putative 40S ribosomal protein S30; shows colonymorphology-related gene regulation by Ssn6p
orf19.1183	0.54338	0.00334485	CAL0002129		Predicted ORF in Assemblies 19, 20 and 21
orf19.379	0.543252	0.000584319	CAL0004904		Predicted ORF from Assembly 19; removed from Assembly 20
orf19.7602	0.543108	0.00123227	CAL0000794		Predicted ORF in Assemblies 19, 20 and 21; heavymetal (cadmium) stress-induced; oxidative stress-inducedvia Cap1p
orf19.5232	0.542631	0.00030117	CAL0003537	CSI2	Protein essential for growth; transposonmutation affects filamentous growth
orf19.4842	0.54251	0.00395206	CAL0005375		Predicted ORF in Assemblies 19, 20 and 21
orf19.1093	0.54236	0.00121268	CAL0001280	FLO8	Transcription factor; required for wild-typehyphal formation; regulates hyphal gene expression;required for virulence in mouse systemic infection; bindsEfg1p; has LUFS domain; functional homolog of S.cerevisiae Flo8p
orf19.4960	0.541736	0.00204609	CAL0006358		Predicted ORF in Assemblies 19, 20 and 21
orf19.2863	0.541648	0.000600471	CAF0006965		ORF Predicted by Annotation Working Group
orf19.3733	0.540107	0.0045362	CAL0001167	IDP2	Putative isocitrate dehydrogenase; expression isregulated upon white-opaque switching; shows colonymorphology-related gene regulation by Ssn6p
orf19.1229	0.539748	0.00134978	CAL0002842		Predicted ORF in Assemblies 19, 20 and 21
orf19.6259	0.539275	0.000449838	CAL0000517		Predicted ORF in Assemblies 19, 20 and 21
orf19.4029	0.539059	0.000839553	CAL0004731		Predicted ORF in Assemblies 19, 20 and 21
orf19.5225	0.538671	0.000357447	CAF0007036	RPL27A	Predicted ribosomal protein
orf19.5106	0.538401	0.000856332	CAL0002491	DIP2	Protein similar to S. cerevisiae Dip2p, of smallribonucleoprotein complex; transposon mutation affectsfilamentous growth
orf19.873.1	0.538298	0.000377089	CAL0002853		Predicted ORF in Assemblies 19, 20 and 21;possibly spurious ORF (Annotation Working Groupprediction)
orf19.3477	0.53801	0.00028711	CAL0005064		Predicted ORF in Assemblies 19, 20 and 21
orf19.4630	0.537766	0.00118716	CAL0003663	CPA1	Alkaline downregulated
orf19.6727	0.537295	0.000487194	CAL0004801	RIT1	Putative initiator tRNA methionineribosyltransferase; fungal-specific (no human or murinehomolog)
orf19.7362	0.536899	0.000345872	CAL0004709	SKN1	Protein with predicted role in beta-1,6-glucansynthesis; probable N-glycosylated type II membraneprotein; transcription and change in mRNA length inducedby yeast-hyphal transition; transcription induced byRim101p or caspofungin
orf19.6591	0.536068	0.00131064	CAL0003330		Predicted ORF in Assemblies 19, 20 and 21
orf19.6881	0.534621	0.00115733	CAL0005897	YTH1	Protein described as an mRNA cleavage andpolyadenylation specificity factor; transcription isregulated upon yeast-hyphal switch; decreased expressionin hyphae compared to yeast-form cells; fluconazole orflucytosine induced
orf19.6297	0.534446	0.0125451	CAL0000624		Predicted ORF in Assemblies 19, 20 and 21
orf19.475	0.534159	0.000490658	CAL0005798		Predicted ORF in Assemblies 19, 20 and 21
orf19.1840	0.534105	0.000422329	CAL0001672		Predicted ORF in Assemblies 19, 20 and 21
orf19.4793	0.533893	0.00141863	CAL0004612		Predicted ORF in Assemblies 19, 20 and 21
orf19.7546	0.53303	0.000448637	CAL0000056		Predicted ORF in Assemblies 19, 20 and 21
orf19.5530	0.532727	0.00919624	CAL0006136	NAB3	Predicted ORF in Assemblies 19, 20 and 21;flucytosine repressed
orf19.2990	0.532305	0.0145703	CAL0006153	XOG1	Exo-1,3-beta-glucanase, major exoglucanase;member of family 5 glycosyl hydrolases; affectssensitivity to inhibitors of chitin and glucan synthesis;not required for yeast-to-hyphal transition or forvirulence in mouse systemic infection
orf19.2667	0.531511	0.000520166	CAL0003496	RPF1	Predicted ORF in Assemblies 19, 20 and 21;essential for growth
orf19.6941	0.531388	0.00173313	CAL0000264		Predicted ORF in Assemblies 19, 20 and 21
orf19.5159	0.531293	0.00164426	CAL0002597		Predicted ORF in Assemblies 19, 20 and 21;similarity to S. cerevisiae Ynl191p; similar toamidophosphoribosyl transferases
orf19.7404	0.53104	0.000554309	CAL0005425		Predicted ORF in Assemblies 19, 20 and 21
orf19.3547	0.530774	0.000344736	CAL0005913		Predicted ORF in Assemblies 19, 20 and 21
orf19.2392	0.530197	0.000397397	CAL0000834		Protein not essential for viability
orf19.7558	0.530169	0.000300643	CAL0000099	YTA6	Protein similar to S. cerevisiae Yta6p ATPase;transposon mutation affects filamentous growth
orf19.4173	0.52954	0.000919572	CAL0005815		Predicted ORF in Assemblies 19, 20 and 21
orf19.444	0.528918	0.000520166	CAL0005693		Predicted ORF in Assemblies 19, 20 and 21
orf19.6736	0.528562	0.000274079	CAL0004833		Predicted ORF in Assemblies 19, 20 and 21
orf19.1162	0.527699	0.00164426	CAF0006922		ORF Predicted by Annotation Working Group
orf19.1045	0.527478	0.000491296	CAL0001156		Predicted ORF in Assemblies 19, 20 and 21
orf19.2842	0.524584	0.00037085	CAL0005136	GZF3	Predicted ORF in Assemblies 19, 20 and 21;oxidative stress-induced via Cap1p
orf19.4651	0.524338	0.000785486	CAL0003718	PGA53	Putative GPI-anchored protein of unknownfunction; greater mRNA abundance observed in a cyr1homozygous null mutant than in wild type
orf19.6662	0.524327	0.000421856	CAL0004083		Predicted ORF in Assemblies 19, 20 and 21
orf19.6440	0.524147	0.00456395	CAL0002208		Predicted ORF in Assemblies 19, 20 and 21
orf19.4775	0.524101	0.000634692	CAL0004552	CTA8	Predicted ORF in Assemblies 19, 20 and 21;activates transcription in 1-hybrid assay in S.cerevisiae
orf19.3130	0.523842	0.000841199	CAL0002280		Predicted ORF in Assemblies 19, 20 and 21
orf19.6283	0.523784	0.000856332	CAL0000591		Predicted ORF in Assemblies 19, 20 and 21
orf19.1708	0.523651	0.00238333	CAL0000767		Predicted ORF in Assemblies 19, 20 and 21
orf19.6477	0.522736	0.00133806	CAL0002289		Predicted ORF in Assemblies 19, 20 and 21
orf19.5217	0.522623	0.00155785	CAL0003506		Predicted ORF in Assemblies 19, 20 and 21
orf19.968	0.522573	0.000396082	CAL0003749	PGA14	Putative GPI-anchored protein of unknownfunction; induced during cell wall regeneration; regulatedby Ssn6p
orf19.3609	0.522429	0.000300643	CAL0000290		Predicted ORF in Assemblies 19, 20 and 21
orf19.5407	0.52209	0.000511818	CAL0005164		Predicted ORF in Assemblies 19, 20 and 21
orf19.2192	0.521905	0.000494589	CAL0005475	GDH2	Putative NAD-specific glutamate dehydrogenase;fungal-specific (no human or murine homolog);transcription is regulated by Nrg1p, Mig1p, Tup1p, andGcn4p
orf19.3210	0.52104	0.00142013	CAL0003210		Predicted ORF in Assemblies 19, 20 and 21; Plc1p-regulated; possibly spurious ORF (Annotation Working Groupprediction)
orf19.706	0.520735	0.000895032	CAL0001704	NMD3	Predicted ORF in Assemblies 19, 20 and 21;downregulated in core stress response
orf19.5134	0.520681	0.000624771	CAL0002551		Predicted ORF in Assemblies 19, 20 and 21
orf19.1687	0.520328	0.00199159	CAL0000153		Predicted ORF in Assemblies 19, 20 and 21
orf19.17	0.520243	0.000287357	CAL0000508	SCP1	Predicted ORF in Assemblies 19, 20 and 21;constitutive expression independent of MTL or white-opaquestatus
orf19.5741	0.519851	0.0086325	CAL0001440	ALS1	Adhesin; ALS family of cell-surfaceglycoproteins; adhesion, virulence roles;immunoprotective; in band at hyphal base; similar to S.cerevisiae Sag1p; biofilm-induced; Rfg1p, Ssk1p, growth-regulated; strain background affects expression
orf19.6514	0.517949	0.000275303	CAL0003077	CUP9	Transcription reduced upon yeast-hyphal switch;ketoconazole-induced; Plc1p-regulated; shows colonymorphology-related gene regulation by Ssn6p
orf19.1564	0.517294	0.0008567	CAL0005564		Predicted ORF in Assemblies 19, 20 and 21
orf19.4133	0.517188	0.0010554	CAL0005669		Predicted ORF in Assemblies 19, 20 and 21
orf19.4479	0.516164	0.000219954	CAL0001965		Predicted ORF in Assemblies 19, 20 and 21;downregulated during core stress response
orf19.2717	0.515915	0.00028711	CAL0004189	SAS10	Predicted ORF in Assemblies 19, 20 and 21;repressed upon high-level peroxide stress
orf19.3781	0.515524	0.00138742	CAL0001295		Predicted ORF in Assemblies 19, 20 and 21
orf19.2564	0.514357	0.000204927	CAL0002504		Predicted ORF in Assemblies 19, 20 and 21
orf19.489	0.514195	0.00142083	CAL0005848	DAP1	Protein similar to S. cerevisiae Dap1p, which isa protein related to mammalian membrane-associatedprogesterone receptors involved in response to DNA damage;induced in core stress response; Hog1p regulated
orf19.216	0.514153	0.000915277	CAL0003897		Predicted ORF in Assemblies 19, 20 and 21;ketoconazole-induced; upregulation correlates withclinical development of fluconazole resistance
orf19.1727	0.512681	0.00102282	CAL0000810	PMC1	Vacuolar calcium P-type ATPase; transcription isregulated by calcineurin and fluconazole; mutant showsincreased resistance to fluconazole or lithium, andincreased sensitivity to calcium
orf19.2385	0.512599	0.000363593	CAL0000813	KTI12	Protein similar to S. cerevisiae Kti12p, whichassociates with Elongator complex; has a role inresistance to killer toxin; predicted Kex2p substrate
orf19.1771	0.512555	0.000275303	CAL0000928		Predicted ORF in Assemblies 19, 20 and 21
orf19.3195	0.512393	0.000257234	CAL0002448	HIP1	Alkaline upregulated; flucytosine induced;regulated by Plc1p, Gcn2p and Gcn4p; fungal-specific (nohuman or murine homolog)
orf19.4349.6	0.512079	0.000233182	CAL0001022		Predicted ORF in Assemblies 19, 20 and 21
orf19.3778	0.511236	0.00118111	CAL0001276		Predicted ORF in Assemblies 19, 20 and 21;downregulated in core stress response
orf19.5608	0.51013	0.000558398	CAL0000539		Predicted ORF in Assemblies 19, 20 and 21
orf19.2636	0.510085	0.000363399	CAL0003437		Predicted ORF from Assembly 19; merged with orf19.6654 in Assembly 20
orf19.2353	0.509743	0.00102552	CAL0000751		Predicted ORF from Assembly 19; merged with orf19.1840 in Assembly 20
orf19.2386	0.509567	0.000273486	CAL0000815		Predicted ORF in Assemblies 19, 20 and 21
orf19.6917	0.509473	0.000543176	CAL0000169		Predicted ORF in Assemblies 19, 20 and 21
orf19.5869	0.508133	0.000430276	CAL0002416		Predicted ORF in Assemblies 19, 20 and 21
orf19.414	0.508129	0.000253587	CAL0005574		Predicted ORF in Assemblies 19, 20 and 21
orf19.4371	0.507817	0.000990687	CAL0001103	TAL1	Predicted ORF in Assemblies 19, 20 and 21;oxidative stress-induced via Cap1p; induced by nitricoxide in yhb1 mutant
orf19.7611	0.507009	0.000190729	CAL0000819	TRX1	Similar to thioredoxin; increased transcriptionis observed upon benomyl treatment; flucytosine, peroxideinduced; amphotericin B, caspofungin repressed;upregulated in the presence of human neutrophils;macrophage-downregulated gene
orf19.7583	0.506933	0.000575258	CAL0000209		Putative transcription factor with zinc clusterDNA-binding motif; not essential for viability; filamentinduced
orf19.3003	0.506904	0.00036873	CAF0006876	RPL6	Protein similar to S. cerevisiae Rpl6p, which isa ribosomal subunit; transposon mutation affectsfilamentous growth; translation-related genes aredownregulated upon phagocytosis by murine macrophage
orf19.7502	0.506822	0.000520166	CAL0006352		Predicted ORF in Assemblies 19, 20 and 21;greater mRNA abundance observed in a cyr1 homozygous nullmutant than in wild type; possibly spurious ORF(Annotation Working Group prediction)
orf19.5704	0.506623	0.000311715	CAL0001357		Predicted ORF in Assemblies 19, 20 and 21
orf19.6918	0.506456	0.00114362	CAL0000173		Predicted ORF in Assemblies 19, 20 and 21
orf19.2165	0.506394	0.000503667	CAL0005392		Predicted ORF in Assemblies 19, 20 and 21;induced by nitric oxide
orf19.4519	0.506383	0.00075173	CAL0002663	SUV3	Protein required for chlamydospore formation,for embedded hyphal growth, and for wild-type respiratorygrowth; similar to S. cerevisiae Suv3p, which is an RNAhelicase involved in mitochondrial RNA catabolism
orf19.2268	0.505682	0.00244721	CAL0006324	RCK2	Predicted ORF in Assemblies 19, 20 and 21;similar to S. cerevisiae serine/threonine protein kinase;induced by osmotic stress via Hog1p;macrophage/pseudohyphal-repressed
orf19.1226	0.504701	0.000228048	CAL0002839		Predicted ORF from Assembly 19; merged with orf19.2778 in Assembly 20
orf19.3945	0.504685	0.000807369	CAL0002980		Predicted ORF in Assemblies 19, 20 and 21
orf19.3522	0.504565	0.00704542	CAL0005836		Predicted ORF in Assemblies 19, 20 and 21;transcription is downregulated in response to treatmentwith ciclopirox olamine
orf19.1404	0.503549	0.00207277	CAL0004455		Predicted ORF in Assemblies 19, 20 and 21
orf19.7384	0.502321	0.000216282	CAL0004804		Predicted ORF in Assemblies 19, 20 and 21
orf19.500	0.50182	0.000308089	CAL0000045		Predicted ORF in Assemblies 19, 20 and 21
orf19.3302	0.50177	0.00299798	CAL0004041		Predicted ORF in Assemblies 19, 20 and 21;transcription downregulated upon yeast-hyphal switch
orf19.6416	0.501499	0.000662993	CAL0002139		Predicted ORF in Assemblies 19, 20 and 21
orf19.2538	0.501429	0.000177439	CAL0002447		Predicted ORF in Assemblies 19, 20 and 21
orf19.6451	0.500606	0.000280873	CAL0002226		Predicted ORF from Assembly 19; similar to a region of the Tca2 (pCal) retrotransposon, which is present in strain hOG1042 as 50 to 100 copies of a linear dsDNA; removed from Assembly 20
orf19.1471	0.50038	0.000222984	CAL0004689	COX4	Protein described as subunit IV of cytochrome coxidase; transcription is regulated by Mig1p;macrophage/pseudohyphal-induced gene; macrophage-inducedprotein; repressed by nitric oxide: intron in 5'-UTR
orf19.6347	0.49971	0.000403275	CAL0001327		Predicted ORF in Assemblies 19, 20 and 21
orf19.4377	0.499105	0.000234435	CAL0001119	KRE1	Predicted GPI-anchor, role in 1,6-beta-D-glucanbiosynthesis; production in S. cerevisiae increases glucancontent and complements killer toxin sensitivity of kre1mutant; possible N-linked glycosylation at Asn109;caspofungin induced
orf19.7050	0.49891	0.00235284	CAL0002077	NOP15	Protein described as a nucleolar ribosomebiogenesis factor; hyphal-induced expression
orf19.1466	0.498611	0.000520309	CAL0004656		Predicted ORF in Assemblies 19, 20 and 21
orf19.5465	0.498505	0.000273486	CAL0005297		Predicted ORF in Assemblies 19, 20 and 21
orf19.3669	0.498218	0.000233182	CAL0000440	SHA3	Protein similar to S. cerevisiae Sha3p, which isa serine/threonine kinase involved in glucose transport;transposon mutation affects filamentous growth;fluconazole-induced; ketoconazole-repressed; induced inresponse to alpha pheromone
orf19.6078	0.497944	0.0014677	CAF0007065	IPF14619.2	ORF Predicted by Annotation Working Group
orf19.4591	0.497804	0.000901593	CAL0002936	CTN2	Predicted carnitine acetyl transferase; similarto S. cerevisiae Cat2p; transcriptionally induced inmacrophage; farnesol-upregulated in biofilm; Hog1p-downregulated
orf19.1910	0.497166	0.000935991	CAL0002513		Predicted ORF in Assemblies 19, 20 and 21
orf19.410.3	0.496926	0.000408367	CAF0006895		Lumazine synthase (6,7-dimethyl-8-ribityllumazine synthase, DMRL synthase); catalyzes the penultimate step in the synthesis of riboflavin
orf19.2712	0.496529	0.000687314	CAL0004182	HCA4	Putative role in regulation of biogenesis of thecell wall; upregulated in biofilm
orf19.1253	0.496129	0.000285096	CAL0002952		Predicted ORF in Assemblies 19, 20 and 21
orf19.107	0.49547	0.000421856	CAL0002969		Predicted ORF in Assemblies 19, 20 and 21
orf19.6685	0.495294	0.00283365	CAL0004135		Predicted ORF in Assemblies 19, 20 and 21
orf19.3215	0.494717	0.000520166	CAL0003225		Predicted ORF in Assemblies 19, 20 and 21;transcription is repressed in response to alpha pheromonein SpiderM medium
orf19.3656	0.493742	0.00138742	CAL0000422	COX15	Transcription is regulated by Nrg1p and Tup1p;alkaline downregulated
orf19.3942	0.493732	0.000860353	CAF0007000	RPL43A	Downregulated in the presence of human wholeblood or polymorphonuclear (PMN) cells; shows colonymorphology-related gene regulation by Ssn6p
orf19.6041	0.492829	0.000413783	CAL0005126	RPO41	Predicted ORF in Assemblies 19, 20 and 21;downregulated during core stress response
orf19.7593	0.492678	0.00343402	CAL0000243		Predicted ORF in Assemblies 19, 20 and 21
orf19.3914	0.492535	0.000597298	CAL0002861		Predicted ORF in Assemblies 19, 20 and 21
orf19.3827	0.491099	0.00132105	CAL0001997		Predicted ORF in Assemblies 19, 20 and 21
orf19.3867	0.490961	0.00161346	CAL0002123	RPL7	Putative ribosomal-related protein; genesencoding cytoplasmic ribosomal subunits, translationfactors, and tRNA synthetases are downregulated uponphagocytosis by murine macrophage
orf19.5959	0.490935	0.000212234	CAL0003384		Predicted ORF in Assemblies 19, 20 and 21
orf19.2933	0.490563	0.00897252	CAL0006014		Predicted ORF in Assemblies 19, 20 and 21
orf19.2688	0.487873	0.000159801	CAL0003534		Predicted ORF in Assemblies 19, 20 and 21
orf19.6601.1	0.487329	0.000689844	CAL0003917		Predicted ORF in Assemblies 19, 20 and 21;possibly spurious ORF (Annotation Working Groupprediction)
orf19.6316.4	0.487163	0.000290194	CAL0001263		Predicted ORF in Assemblies 19, 20 and 21
orf19.4746	0.487126	0.000330155	CAL0004454	JIP5	Protein not essential for viability;downregulated during core stress response
orf19.6360	0.486956	0.000158929	CAL0001356		Predicted ORF in Assemblies 19, 20 and 21
orf19.3041	0.486826	0.00096757	CAL0001405		Predicted ORF in Assemblies 19, 20 and 21
orf19.6079	0.486447	0.00439082	CAL0005197		Predicted ORF in Assemblies 19, 20 and 21;transcription is downregulated in response to treatmentwith ciclopirox olamine; filament induced; regulated byRfg1p, Tup1p
orf19.118	0.485748	0.000188307	CAL0003001	FAD2	Delta-12 fatty acid desaturase, involved inproduction of linoleic acid, which is a major component ofmembranes
orf19.3012	0.485285	0.000193453	CAL0001342	ARO80	Protein not essential for viability; similar toS. cerevisiae Aro80p, which is a transcriptional activatorrequired for aromatic amino acid catabolism
orf19.3476	0.485111	0.000164532	CAL0005063		Predicted ORF in Assemblies 19, 20 and 21
orf19.4282	0.484722	0.000184036	CAL0000350		Predicted ORF in Assemblies 19, 20 and 21;greater mRNA abundance observed in a cyr1 homozygous nullmutant than in wild type; possibly spurious ORF(Annotation Working Group prediction)
orf19.1091	0.484413	0.000287357	CAL0001277		Putative ortholog of S. cerevisiae Nop8p, whichis a nucleolar protein required for 60S ribosomal subunitbiogenesis
orf19.2527	0.483892	0.000449537	CAL0002419		Predicted ORF in Assemblies 19, 20 and 21;induced upon biofilm formation
orf19.1028	0.483649	0.00134978	CAL0001087		Predicted ORF in Assemblies 19, 20 and 21
orf19.7028	0.483494	0.000344756	CAL0001979		Predicted ORF in Assemblies 19, 20 and 21
orf19.3485	0.483429	0.00015713	CAL0005092		Predicted ORF from Assembly 19; merged with orf19.6283 in Assembly 20
orf19.7552	0.483249	0.000167235	CAL0000085		Predicted ORF in Assemblies 19, 20 and 21;downregulated during core stress response
orf19.7504	0.481987	0.000231494	CAL0006354		Predicted ORF in Assemblies 19, 20 and 21; Plc1p-regulated; induced in core caspofungin response
orf19.1950	0.481924	0.000419124	CAL0002596		Predicted ORF in Assemblies 19, 20 and 21
orf19.76	0.481505	0.000296644	CAL0000659		Predicted ORF in Assemblies 19, 20 and 21
orf19.5066	0.481366	0.000212234	CAL0001723		Predicted ORF in Assemblies 19, 20 and 21;essential; S. cerevisiae ortholog is essential
orf19.6556	0.481351	0.000184036	CAL0003218		Predicted ORF in Assemblies 19, 20 and 21
orf19.5867	0.480415	0.000164394	CAL0002412	WSC1	Protein described as a cell wall component;increased mRNA abundance observed in cyr1 homozygous nullmutant (yeast-form or hyphal cells)
orf19.5224	0.480393	0.000252495	CAL0003522		Predicted ORF in Assemblies 19, 20 and 21
orf19.403	0.479877	0.000548213	CAL0005537	PCL2	Cyclin homolog; reduced expression observed upondepletion of Cln3p; farnesol regulated
orf19.3630	0.478584	0.000287248	CAL0000367	RRP8	Predicted ORF in Assemblies 19, 20 and 21;induced upon biofilm formation
orf19.3482	0.478038	0.00041463	CAL0005086		Predicted ORF in Assemblies 19, 20 and 21
orf19.6817	0.477713	0.00224037	CAL0005662	FCR1	Putative zinc cluster transcription factor;negative regulator of fluconazole, ketoconazole, brefeldinA resistance; transposon mutation affects filamentousgrowth; partially suppresses S. cerevisiae pdr1 pdr3mutant fluconazole sensitivity
orf19.603	0.47702	0.000141153	CAL0000877		Predicted ORF in Assemblies 19, 20 and 21
orf19.7592	0.476916	0.000192728	CAL0000241	FAA4	Predicted acyl CoA synthase
orf19.462	0.476554	0.000760379	CAL0005759		Predicted ORF from Assembly 19; removed from Assembly 20
orf19.4907	0.476549	0.00853776	CAL0006205		Predicted ORF in Assemblies 19, 20 and 21;increased transcription is observed upon fluphenazinetreatment; possibly transcriptionally regulated by Tac1p;induced by nitric oxide; fungal-specific (no human ormurine homolog)
orf19.2887	0.475782	0.000285888	CAL0005225	MET13	Predicted ORF in Assemblies 19, 20 and 21;ketoconazole-induced; amphotericin B repressed
orf19.246	0.475542	0.000344756	CAL0003987		Predicted ORF in Assemblies 19, 20 and 21;fungal-specific (no human or murine homolog)
orf19.773	0.475396	0.00014391	CAL0001939		Putative ortholog of S. cerevisiae Rsa3p, whichis a nucleolar protein involved in maturation of pre-60Sribosomal particles that interacts with Dbp6p
orf19.3679	0.475009	0.000760379	CAL0000455		Predicted ORF in Assemblies 19, 20 and 21
orf19.5206	0.474022	0.000247897	CAL0003486		Predicted ORF in Assemblies 19, 20 and 21
orf19.4563	0.473406	0.000123857	CAL0002825		Predicted ORF in Assemblies 19, 20 and 21
orf19.5213.2	0.472986	0.000112565	CAF0007033	COX8	ORF Predicted by Annotation Working Group;flucytosine induced; caspofungin repressed
orf19.3466	0.472783	0.00116402	CAL0005038		Predicted ORF in Assemblies 19, 20 and 21;decreased transcription is observed upon fluphenazinetreatment or in an azole-resistant strain thatoverexpresses CDR1 and CDR2
orf19.6589	0.472524	0.00015713	CAL0003319		Predicted ORF in Assemblies 19, 20 and 21
orf19.904	0.471856	0.00013294	CAL0003575		Predicted ORF in Assemblies 19, 20 and 21;possibly spurious ORF (Annotation Working Groupprediction)
orf19.3571	0.471609	0.000334399	CAL0005970		Predicted ORF in Assemblies 19, 20 and 21
orf19.921	0.47106	0.000149047	CAL0003626		Predicted ORF in Assemblies 19, 20 and 21
orf19.4351	0.470396	0.000454266	CAL0001035	PRP12	Predicted ORF from Assembly 19; fungal-specific (no human or murine homolog); merged with orf19.4379 in Assembly 20
orf19.4304	0.469921	0.000239264	CAL0000889	GAP1	General amino acid permease; antigenic in human;10-12 transmembrane regions; regulated by nitrogen source;alkaline, GlcNAc, phagocytosis upregulated; not requiredfor virulence in mouse systemic infection; fungal-specific
orf19.1686	0.469889	0.000970853	CAL0000152		Predicted ORF in Assemblies 19, 20 and 21
orf19.90	0.469539	0.00136624	CAL0000702		Predicted ORF in Assemblies 19, 20 and 21
orf19.3720	0.468873	0.000879924	CAL0001131		Predicted ORF in Assemblies 19, 20 and 21
orf19.3539	0.468493	0.000188307	CAL0005891		Predicted ORF in Assemblies 19, 20 and 21
orf19.5213.1	0.467922	0.000677749	CAL0003502		Predicted ORF in Assemblies 19, 20 and 21
orf19.1552	0.467789	0.000545052	CAL0005525	CPR3	Protein described as a peptidyl-prolyl cis-transisomerase; macrophage-induced protein
orf19.6214	0.467644	0.000683114	CAL0000443	ATC1	Cell wall acid trehalase; catalyzes hydrolysisof the disaccharide trehalose; similar to S. cerevisiaevacuolar acid trehalase (Ath1p)
orf19.4964	0.467591	0.000698703	CAL0006363		Predicted ORF in Assemblies 19, 20 and 21
orf19.4273	0.467108	0.000133581	CAL0000318		Predicted ORF in Assemblies 19, 20 and 21
orf19.4363	0.466951	0.000129107	CAL0001070	SGD1	Predicted ORF in Assemblies 19, 20 and 21;downregulated during core stress response; transcriptionis increased in populations of cells exposed tofluconazole over multiple generations
orf19.6037	0.466943	0.00685783	CAL0005104	ASM3	Putative secreted acid sphingomyelinphosphodiesterase; induced upon biofilm formation;possible Kex2p substrate; increased transcription isobserved in an azole-resistant strain that overexpressesMDR1
orf19.3153	0.46632	0.000103944	CAL0002340	MSS4	Phosphatidylinositol-4-phosphate 5-kinase;activity induced by phosphatidic acid (Pld1p product);associated with hyphal growth under some, not all,conditions; functional homolog of S. cerevisiae Mss4p;macrophage/pseudohyphal-repressed
orf19.4464	0.466203	0.000285293	CAL0001912	SEN15	Similar to delta subunit of tRNA splicingendonuclease; increased transcription is observed uponfluphenazine treatment
orf19.5635	0.46596	0.00694771	CAL0000616	PGA7	Protein described as a putative precursor of ahyphal surface antigen; putative GPI-anchor; induced byciclopirox olamine, ketoconazole, or by Rim101p at pH 8;regulated during planktonic growth; induced during cellwall regeneration
orf19.2330	0.464903	0.000105094	CAL0000714		Predicted ORF in Assemblies 19, 20 and 21;similar to S. cerevisiae Yor205cp; transposon mutationaffects filamentous growth
orf19.3578	0.46422	0.00137911	CAL0005979		Predicted ORF in Assemblies 19, 20 and 21
orf19.1285	0.464219	0.000168647	CAL0003062		Predicted ORF in Assemblies 19, 20 and 21
orf19.6059	0.464206	0.000121955	CAL0005151	TTR1	Similar to glutaredoxin; described as aglutathione reductase; upregulated in the presence ofhuman neutrophils; increased transcription is observedupon benomyl treatment; alkaline downregulated; regulatedby Gcn2p and Gcn4p
orf19.1849	0.463996	0.000175601	CAL0001680		Predicted ORF in Assemblies 19, 20 and 21
orf19.6920	0.463832	0.000141479	CAL0000195		Predicted ORF in Assemblies 19, 20 and 21;induced upon biofilm formation; possibly spurious ORF(Annotation Working Group prediction)
orf19.6234	0.462218	0.000204594	CAL0000477		Predicted ORF in Assemblies 19, 20 and 21
orf19.6596	0.462157	0.000154798	CAL0003339		Gene is possibly transcriptionally regulated byTac1p
orf19.839	0.461919	0.000944796	CAL0002720		Predicted ORF in Assemblies 19, 20 and 21;induced by nitric oxide in yhb1 mutant
orf19.1589	0.46181	0.000115112	CAL0005647		Putative DNA-binding transcription factor
orf19.3469	0.461082	0.00211312	CAL0005041		Predicted ORF in Assemblies 19, 20 and 21;greater mRNA abundance observed in a cyr1 homozygous nullmutant than in wild type
orf19.7306	0.461023	0.000683114	CAL0004509		Protein of aldo-keto reductase family; increasedtranscription is associated with MDR1 overexpression,benomyl or long-term fluconazole treatment;overexpressiondoes not affect drug or oxidative stress sensitivity
orf19.1743	0.460026	0.000212234	CAL0000855	ACS1	Putative acetyl-CoA synthetase, similar to S.cerevisiae Acs2p; upregulated in the presence of humanneutrophils; fluconazole-downregulated; regulated by Nrg1pand Mig1p; shows colony morphology-related gene regulationby Ssn6p
orf19.5032	0.459555	0.000654533	CAL0001642	SIM1	Protein described as a DNA replicationregulatory protein; macrophage-downregulated gene;transcription is negatively regulated by Rim101p, Cyr1p,Ras1p
orf19.3393	0.459279	0.000911824	CAL0004220		Putative DEAD-box helicase
orf19.1441	0.458407	0.000180618	CAL0004586		Predicted ORF in Assemblies 19, 20 and 21
orf19.5754	0.458034	0.00127443	CAL0001469		Predicted ORF in Assemblies 19, 20 and 21;fluconazole-induced
orf19.1960	0.457759	0.000116843	CAL0002632	CLN3	G1 cyclin; depletion causes abolished buddingand hyphal growth defects; likely to be essential;farnesol regulated, upregulated in biofilm; functional inS. cerevisiae; similar to S. cerevisiae Cln3p, which is aG1-specific cyclin
orf19.5798	0.457693	0.00949021	CAL0001558	LIG4	DNA ligase; mRNA detected in yeast-form andpseudohyphal cells, induced upon hyphal induction;suppresses S. cerevisiae ime1-1 mutant IME2 transcriptiondefect; required for wild-type filamentous growth and wild-type pathogenesis
orf19.3369	0.457582	0.0011581	CAL0004179	MOH1	Protein similar to &lt;i&gt;S. cerevisiae&lt;/i&gt; Moh1p;transcription is induced in response to alpha pheromone inSpiderM medium
orf19.7475	0.457469	0.000415026	CAL0005667	PHO81	Predicted ORF in Assemblies 19, 20 and 21;possibly adherence-induced
orf19.1971	0.457072	0.00022784	CAL0002668		Predicted ORF in Assemblies 19, 20 and 21
orf19.2942	0.45603	0.001007	CAL0006036	DIP5	Putative permease for dicarboxylic amino acids;transcriptionally induced upon phagocytosis by macrophage;Gcn4p-regulated; upregulated by Rim101p at pH 8
orf19.55	0.45529	0.000151386	CAL0000605		Predicted ORF in Assemblies 19, 20 and 21
orf19.6600	0.454975	0.000105276	CAL0003916		Predicted ORF in Assemblies 19, 20 and 21
orf19.124	0.454792	0.000100667	CAL0003033		Predicted ORF in Assemblies 19, 20 and 21
orf19.260	0.454532	0.000324653	CAL0004027		Predicted ORF in Assemblies 19, 20 and 21
orf19.1180	0.454117	0.000151247	CAL0002124		Predicted ORF in Assemblies 19, 20 and 21
orf19.5197	0.452928	0.000530932	CAL0002735	APE2	Protein repressed during the mating process;Hog1p-induced
orf19.4634	0.451479	0.000188307	CAL0003670		Predicted ORF in Assemblies 19, 20 and 21
orf19.5814	0.451404	0.004854	CAL0002275		Predicted ORF in Assemblies 19, 20 and 21;possibly spurious ORF (Annotation Working Groupprediction)
orf19.225	0.451202	0.00130621	CAL0003924		Predicted ORF in Assemblies 19, 20 and 21
orf19.4701	0.450084	0.000257466	CAL0004342		Predicted ORF in Assemblies 19, 20 and 21
orf19.6828	0.449602	0.00101047	CAF0007087		ORF Predicted by Annotation Working Group
orf19.4664	0.449459	0.000131044	CAL0003754		Predicted ORF in Assemblies 19, 20 and 21
orf19.829	0.448916	0.000245179	CAL0002687	SCH9	Protein required for chlamydospore formation andfor embedded hyphal growth, not essential for viability;similar to S. cerevisiae Sch9p, which is a protein kinaseinvolved in growth control
orf19.3304	0.448717	0.000158929	CAL0004045		Predicted ORF in Assemblies 19, 20 and 21
orf19.5276	0.447979	0.000840301	CAL0003621		Predicted ORF in Assemblies 19, 20 and 21;induced upon low-level peroxide stress
orf19.7361	0.446097	0.000517476	CAL0004706		Predicted ORF in Assemblies 19, 20 and 21
orf19.4980	0.445758	0.000860353	CAL0000006	HSP70	Putative chaperone of Hsp70 family; role insensitivity to beta-defensin peptides; heat-shock,amphotericin B, Cd, ketoconazole-induced; farnesol-downregulated in biofilm; surface localized in yeast-formand hyphal cells; antigenic in host
orf19.1720	0.445571	0.000982054	CAL0000801		Predicted ORF in Assemblies 19, 20 and 21
orf19.2859	0.445285	7.92906e-05	CAL0005156	SRP40	Predicted ORF in Assemblies 19, 20 and 21;macrophage/pseudohyphal-induced
orf19.7601	0.444764	0.000172632	CAL0000793		Predicted ORF in Assemblies 19, 20 and 21
orf19.2851	0.444656	0.00054953	CAL0005152		Predicted ORF in Assemblies 19, 20 and 21
orf19.7131	0.444412	0.000776626	CAL0002922		Predicted ORF in Assemblies 19, 20 and 21
orf19.7570	0.443542	0.000408561	CAL0000161		Putative transcription factor with zinc clusterDNA-binding motif; has similarity to S. cerevisiae Uga3p,which is a transcription factor involved in the regulationof gamma-aminobutyrate metabolism genes
orf19.4950	0.44345	0.00041277	CAL0006326	AKR1	Ankyrin-repeat protein; increased transcriptionis observed upon fluphenazine treatment
orf19.2185	0.443075	0.00015442	CAL0005449		Predicted ORF in Assemblies 19, 20 and 21
orf19.3370	0.442251	0.000150388	CAL0004185	DOT4	Protein similar to ubiquitin C-terminalhydrolase; localizes to cell surface of hyphal cells, butnot yeast-form cells; repressed upon high-level peroxidestress
orf19.2324	0.44182	0.00104211	CAL0000697		Predicted ORF in Assemblies 19, 20 and 21
orf19.7624	0.44145	0.000213612	CAL0000848		Predicted ORF in Assemblies 19, 20 and 21
orf19.227	0.441072	0.00025908	CAL0003929	COX7	Predicted ORF in Assemblies 19, 20 and 21;flucytosine induced; repressed by nitric oxide
orf19.5067	0.441003	0.000264512	CAL0001724		Predicted ORF in Assemblies 19, 20 and 21
orf19.7468	0.44029	0.00024179	CAL0005632		Predicted ORF in Assemblies 19, 20 and 21
orf19.4799	0.439722	8.56868e-05	CAL0004619		Predicted ORF in Assemblies 19, 20 and 21
orf19.7657	0.439667	0.000123935	CAL0000921		Predicted ORF in Assemblies 19, 20 and 21
orf19.5596	0.439528	0.000249472	CAL0006290		Predicted ORF in Assemblies 19, 20 and 21
orf19.7363	0.439211	0.000249472	CAL0004712	KRE6	Protein of beta-1,6-glucan synthesis; essential;type II membrane protein; N-glycosylation sites; change inmRNA length, but not mRNA abundance, at yeast-hyphaltransition; alkaline upregulated by Rim101p; induced oncell wall regeneration
orf19.6225.1	0.439151	0.000288997	CAL0000460	PCL7	Protein described as cyclin-like, possiblePho85p cyclin; hyphal downregulated
orf19.2414	0.437207	8.87723e-05	CAL0001475		Predicted ORF in Assemblies 19, 20 and 21
orf19.4966	0.436634	7.15099e-05	CAL0006367		Protein not essential for viability;transcription is alkaline upregulated
orf19.1646	0.43599	7.91306e-05	CAL0000019		Predicted ORF in Assemblies 19, 20 and 21
orf19.3478	0.435804	9.12794e-05	CAL0005065	NIP7	Protein described as a nucleolar protein withrole in ribosomal assembly; hyphal induced
orf19.4952	0.435736	0.000192728	CAF0007028		ORF Predicted by Annotation Working Group
orf19.5517	0.435342	0.000182315	CAL0006095		Similar to alcohol dehydrogenases; increasedtranscription is observed upon benomyl treatment; inducedby nitric oxide; induced in core stress response;oxidative stress-induced via Cap1p
orf19.5815	0.434942	0.000128587	CAL0002276	SCT2	Putative glycerol-3-phosphate acyltransferase;fungal-specific (no human or murine homolog)
orf19.2655	0.434436	0.00136492	CAL0003474	BUB3	Protein similar to S. cerevisiae Bub3p, which isa kinetochore checkpoint component; induced underhydroxyurea treatment
orf19.5732	0.434032	8.94739e-05	CAL0001419		Predicted ORF in Assemblies 19, 20 and 21
orf19.966	0.433282	0.000234999	CAL0003746		Predicted ORF in Assemblies 19, 20 and 21
orf19.3305	0.432892	0.000259985	CAL0004047		Putative transcription factor with zinc clusterDNA-binding motif
orf19.4078	0.431644	0.00014391	CAL0004911		Predicted ORF in Assemblies 19, 20 and 21
orf19.5020	0.429833	0.00074811	CAL0001614		Predicted ORF in Assemblies 19, 20 and 21
orf19.2934	0.429722	0.000173902	CAL0006015		Predicted ORF in Assemblies 19, 20 and 21
orf19.4836	0.42919	0.00012857	CAL0005359	URA1	Dihydroorotate dehydrogenase (DHODH); enzyme ofde novo pyrimidine biosynthesis; putative bipartitemitochondrial targeting motif, membrane spanning region;transcription is regulated upon yeast-hyphal switch, or byNrg1p, Mig1p, Tup1p
orf19.3944	0.428706	0.000121955	CAL0002979	GRR1	Protein involved in the negative control ofpseudohyphal growth; ortholog of &lt;i&gt;S. cerevisiae&lt;/i&gt;Grr1p, which is an F-box protein component of the SCFubiquitin-ligase complex required for cell cycleprogression
orf19.3250	0.428289	0.000122601	CAL0003333		Predicted ORF in Assemblies 19, 20 and 21
orf19.4631	0.427883	0.000189757	CAL0003665	ERG251	Predicted ORF in Assemblies 19, 20 and 21;ketoconazole-induced; amphotericin B, caspofunginrepressed
orf19.7379	0.426528	0.000285293	CAL0004773	FAA2	Predicted acyl CoA synthetase; expression isregulated upon white-opaque switching
orf19.6902	0.426439	0.000168265	CAL0000117		Predicted ORF in Assemblies 19, 20 and 21
orf19.7394	0.426299	0.000281372	CAL0004837	GDA1	Golgi membrane GDPase, required for wild-type O-mannosylation, not N-glycosylation; required for wild-typehyphal induction, cell wall, and cell surface charge; notrequired for HeLa cell adherence; functional homolog of S.cerevisiae Gda1p
orf19.6417	0.42624	0.000137445	CAL0002141		Predicted ORF in Assemblies 19, 20 and 21
orf19.3303	0.425081	0.000103926	CAL0004043		Predicted ORF in Assemblies 19, 20 and 21
orf19.3127	0.424972	0.00195585	CAL0002268	CZF1	Transcriptional regulator of white-opaqueswitching; hyphal growth regulator; has C-terminal zincfinger and central Glu-rich region; expression in S.cerevisiae causes dominant-negative inhibition ofpheromone response
orf19.2175	0.424607	0.000238167	CAL0005416		Predicted ORF in Assemblies 19, 20 and 21;induced by nitric oxide
orf19.1308	0.424582	0.000207118	CAL0003710		Predicted ORF in Assemblies 19, 20 and 21
orf19.515	0.424251	0.000247897	CAL0000082		Predicted ORF in Assemblies 19, 20 and 21
orf19.6608	0.423573	0.000619707	CAL0003933		Predicted ORF in Assemblies 19, 20 and 21;downregulation correlates with clinical development offluconazole resistance
orf19.543	0.422795	0.00061724	CAL0000200		Protein described as fumarate hydratase;transcriptionally regulated by iron; expression greater inhigh iron
orf19.4191	0.422441	6.47551e-05	CAF0007003		ORF Predicted by Annotation Working Group
orf19.747	0.421971	8.77204e-05	CAL0001838	NBP35	Similar to nucleotide-binding proteins;increased transcription is observed upon benomyltreatment; transcription is induced upon filamentousgrowth
orf19.1742	0.420767	0.00134978	CAL0000854	HEM3	Hydroxymethylbilane synthase (uroporphyrinogen Isynthase); catalyzes the conversion of 4-porphobilinogento hydroxymethylbilane, the third step in the hemebiosynthetic pathway; transcription greater in high iron;alkaline downregulated
orf19.2371	0.419641	0.000148439	CAL0000780		Putative Gag protein of retrotransposon Tca2; separated by a stop codon from Pol protein orf19.2372; both likely translated as single polyprotein that includes nucleocapsid-like protein (Gag), reverse transcriptase, protease, and integrase
orf19.1082.1	0.419355	8.63864e-05	CAF0006920		ORF Predicted by Annotation Working Group
orf19.4317	0.419282	0.0124096	CAL0000925	GRE3	Similar to D-xylose reductases; antigenic duringmurine systemic infection; soluble protein in hyphae;transcriptionally induced by interaction with macrophage
orf19.4824	0.419039	0.00020029	CAL0005335		Predicted ORF in Assemblies 19, 20 and 21
orf19.2261	0.419022	0.00042264	CAL0006311		Predicted ORF in Assemblies 19, 20 and 21
orf19.7242	0.418848	0.000492669	CAL0003873	NCR1	Transcription is regulated by Nrg1p and Mig1p
orf19.7359	0.418558	7.52632e-05	CAL0004683	CRZ1	Putative transcription factor; similar to S.cerevisiae calcineurin-regulated transcription factorCrz1p; mutant is fluconazole hypersensitive; likely to actdownstream of calcineurin; has C2H2 zinc fingers; notrequired for mouse virulence
orf19.4234	0.41849	0.000145603	CAL0000181		Predicted ORF in Assemblies 19, 20 and 21
orf19.4784	0.418383	0.00063905	CAL0004587	CRP1	Copper transporter of the plasma membrane; P1-type ATPase (CPx type); mediates copper resistance;similar to proteins of Menkes and Wilson disease; copper-induced; suppresses copper sensitivity of an S. cerevisiaecup1 null mutant
orf19.2881	0.418322	0.000102777	CAL0005219	MNN4	Protein required for normalmannosylphosphorylation of oligosaccharides linked to cellwall proteins, not required for virulence or kidneycolonization in mouse systemic infection or for normalinteraction with macrophages
orf19.35	0.417442	8.89095e-05	CAL0000551		Predicted ORF in Assemblies 19, 20 and 21
orf19.5806	0.417187	7.91306e-05	CAL0002252	ALD5	Protein described as an aldehyde dehydrogenase;decreased expression in a fluconazole-resistant isolate,or in hyphae; fluconazole-downregulated; protein abundanceis affected by URA3 expression in the CAI-4 strainbackground
orf19.24	0.416968	0.000545052	CAL0000522	RTA2	Stress-associated protein; ketoconazole,caspofungin induced; Plc1p-regulated; transcription isincreased in a strain resistant to amphotericin B andfluconazole, compared to a wild-type strain
orf19.3759	0.416494	0.000233159	CAL0001223		Predicted ORF in Assemblies 19, 20 and 21
orf19.3854	0.415971	0.00011525	CAL0002089		Protein similar to S. cerevisiae Sat4p;amphotericin B induced
orf19.4951	0.415061	0.000111032	CAL0006327		Predicted ORF in Assemblies 19, 20 and 21;possibly spurious ORF (Annotation Working Groupprediction)
orf19.1735	0.415044	0.000203606	CAL0000833		Predicted ORF in Assemblies 19, 20 and 21
orf19.3663	0.414877	0.00140764	CAL0000434	PHO91	Putative low-affinity phosphate transporter;fungal-specific (no human or murine homolog)
orf19.6266	0.414871	0.000156234	CAL0000542		Predicted ORF in Assemblies 19, 20 and 21
orf19.6402	0.413985	0.000116457	CAL0002103	CYS3	Predicted enzyme of sulfur amino acidbiosynthesis; upregulated in biofilm; alkalineupregulated; amphotericin B induced; possibly adherence-induced; induced by heavy metal (cadmium) stress,oxidative stress (via Cap1p); Hog1p regulated
orf19.970	0.413244	0.000119732	CAL0003769		Predicted ORF in Assemblies 19, 20 and 21
orf19.3089	0.41242	0.000127171	CAL0001508		Predicted ORF in Assemblies 19, 20 and 21
orf19.1957	0.412346	0.000287204	CAL0002603	CYC3	Cytochrome c heme lyase, mitochondrial; genealso encodes antigenic cell-wall protein; mRNA moreabundant in filaments than yeast-form; induced onpolystyrene adherence, interaction with macrophage; N-glycosylation, 2 heme-binding motifs
orf19.1201	0.412277	0.000188307	CAL0002761		Predicted ORF in Assemblies 19, 20 and 21
orf19.775	0.411836	0.00427447	CAL0001943		Predicted ORF in Assemblies 19, 20 and 21
orf19.4870	0.411499	0.000105276	CAL0005460		Predicted ORF in Assemblies 19, 20 and 21
orf19.5228	0.409812	0.000115676	CAL0003526	RIB3	3,4-Dihydroxy-2-butanone 4-phosphate synthase;homodimeric enzyme of riboflavin biosynthesis; convertsribulose 5-phosphate to L-3,4-dihydroxy-2-butanone 4-phosphate; transcription regulated on yeast-hyphal switch,macrophage interaction
orf19.3330	0.408987	0.000413627	CAF0006983		ORF Predicted by Annotation Working Group
orf19.563	0.408844	0.00010759	CAL0000267		Predicted ORF in Assemblies 19, 20 and 21
orf19.7479	0.408581	0.000274491	CAL0005674	NTH1	Neutral trehalase; hyphal induction inhomozygous null mutant is delayed but not reduced overall;not required for virulence in mouse systemic infection;homodimeric enzyme; possible regulatory cAMP-dependentphosphorylation at S10 and S213
orf19.1467	0.408503	5.11715e-05	CAL0004657	COX13	Predicted ORF in Assemblies 19, 20 and 21;flucytosine induced; repressed by nitric oxide
orf19.3756	0.407528	0.000532697	CAL0001218	CHR1	Predicted DEAD-box ATP-dependent RNA helicase,functional homolog of S. cerevisiae Rok1p
orf19.5865	0.407319	0.000104821	CAL0002409		Predicted ORF in Assemblies 19, 20 and 21
orf19.3007.2	0.404691	0.000567294	CAL0001332		Predicted ORF in Assemblies 19, 20 and 21
orf19.3415	0.404317	4.7011e-05	CAF0006985	RPL32	Predicted ribosomal protein
orf19.1902	0.404085	0.000136567	CAL0002495		Predicted ORF in Assemblies 19, 20 and 21
orf19.3665	0.401184	7.18676e-05	CAL0000436		Predicted ORF in Assemblies 19, 20 and 21
orf19.4739	0.400902	8.06185e-05	CAL0004436		Predicted ORF in Assemblies 19, 20 and 21
orf19.28	0.400744	0.000132875	CAL0000526		Predicted ORF in Assemblies 19, 20 and 21
orf19.2119	0.398488	4.71001e-05	CAL0005285	NDT80	Activator of CDR1 induction by antifungal drugs;required for wild-type drug resistance; transcriptionallyinduced upon antifungal drug treatment; similar to S.cerevisiae Ndt80p, which is a meiosis-specifictranscriptional regulator
orf19.3038	0.398326	0.000167235	CAL0001393	TPS2	Trehalose-6-phosphate (Tre6P) phosphatase;mutation causes heat sensitivity, Tre6P accumulation, anddecreased mouse virulence; possible drug target; twoconserved phospohydrolase motifs; no human or murinehomolog
orf19.3016	0.398259	8.1598e-05	CAL0001350		Predicted ORF in Assemblies 19, 20 and 21
orf19.6686	0.397761	0.000102842	CAL0004137		Predicted ORF in Assemblies 19, 20 and 21;essential; S. cerevisiae ortholog is essential
orf19.2778	0.39758	0.00053849	CAL0004274		Predicted ORF in Assemblies 19, 20 and 21
orf19.5799	0.39711	5.24194e-05	CAF120		Predicted ORF in Assemblies 19, 20 and 21
orf19.4760	0.396746	0.00038916	CAL0004512		Predicted ORF in Assemblies 19, 20 and 21
orf19.7565	0.396567	0.000243834	CAL0000134	GNP3	Putative high-affinity glutamine permease;fungal-specific (no human or murine homolog)
orf19.4379	0.396498	0.000158026	CAL0001123	PRP13	Predicted ORF in Assemblies 19, 20 and 21;fungal-specific (no human or murine homolog)
orf19.6052	0.395065	0.000240319	CAL0005143		Predicted ORF in Assemblies 19, 20 and 21
orf19.4444	0.394638	5.81189e-05	CAL0001845	PHO15	Protein described as 4-nitrophenyl phosphatase;hyphal downregulated; induced in core stress response;induced by heavy metal (cadmium) stress via Hog1p
orf19.6886	0.394588	0.000128414	CAL0005905		Predicted ORF in Assemblies 19, 20 and 21
orf19.86	0.394434	0.000280873	CAL0000683		Protein described as glutathione peroxidase;macrophage-downregulated gene
orf19.5500	0.393975	5.04391e-05	CAL0006057		Predicted ORF in Assemblies 19, 20 and 21
orf19.2375	0.393008	0.000178887	CAL0000787		Predicted ORF from Assembly 19; orf19.2371, orf19.2372, and orf19.2375 are similar to the Tca2 (pCal) retrotransposon, which is present in strain hOG1042 as 50 to 100 copies of a linear dsDNA; removed from Assembly 20
orf19.1388	0.391936	0.000100667	CAL0003945		Predicted ORF in Assemblies 19, 20 and 21;induced upon biofilm formation
orf19.6840	0.390595	8.95573e-05	CAL0005757		Predicted ORF in Assemblies 19, 20 and 21;transcription is induced in response to alpha pheromone inSpiderM medium
orf19.7410	0.389886	0.000182518	CAL0005453		Protein not essential for viability
orf19.1642	0.388828	7.91306e-05	CAL0000014		Predicted ORF in Assemblies 19, 20 and 21
orf19.7392	0.388659	8.05752e-05	CAL0004832		Predicted ORF in Assemblies 19, 20 and 21
orf19.3439	0.387837	0.000779097	CAL0004974		Predicted ORF in Assemblies 19, 20 and 21;greater mRNA abundance observed in a cyr1 homozygous nullmutant than in wild type
orf19.3515	0.386549	4.66467e-05	CAL0005808		Predicted ORF in Assemblies 19, 20 and 21
orf19.866	0.38599	6.47551e-05	CAL0002818	RAD32	Protein similar to S. cerevisiae protein withrole in nucleotide excision repair; down-regulationassociated with azole resistance
orf19.7227	0.385925	0.000126156	CAL0003807		Predicted ORF in Assemblies 19, 20 and 21
orf19.661	0.385788	4.80835e-05	CAL0001053	KRR1	Decreased transcription is observed upon benomyltreatment or in an azole-resistant strain thatoverexpresses MDR1; induced upon biofilm formation
orf19.5805	0.385736	0.00051002	CAL0002250	DLD1	Transcription is specific to white cell type;shows colony morphology-related gene regulation by Ssn6p
orf19.4399	0.385472	4.36001e-05	CAL0001191		Predicted ORF in Assemblies 19, 20 and 21
orf19.4763	0.384023	0.000169164	CAL0004515		Protein not essential for viability
orf19.6343	0.383142	7.25117e-05	CAL0001319		Predicted ORF in Assemblies 19, 20 and 21
orf19.6447	0.383085	5.94698e-05	CAL0002216	ARF1	ADP-ribosylation factor, probable GTPaseinvolved in intracellular transport; one of several C.albicans ADP-ribosylation factors; N-myristoylprotein;substrate of Nmt1p
orf19.3171	0.382215	0.000123571	CAL0002388	ACH1	Soluble protein in hyphae; similar to S.cerevisiae Ach1p, which is acetyl-coA hydrolase requiredfor acetate utilization; nonessential; antigenic in human;induced on polystyrene adherence; ketoconazole-induced; nohuman or murine homolog
orf19.4077	0.381647	0.000359276	CAL0004910	MIT1	Protein involved in sphingolipid biosynthesis;required for mannosylation of inositol phosphoceramide(IPC) to form mannosylated sphingolipids MIPC and M(IP)2C;fluconazole, caspofungin induced; macrophage-downregulatedgene
orf19.6951	0.381419	6.04731e-05	CAL0000297		Predicted ORF in Assemblies 19, 20 and 21
orf19.7469	0.380632	9.06173e-05	CAL0005634	ARG1	Similar to argininosuccinate synthase; enzyme ofarginine biosynthesis; increased transcription is observedupon benomyl treatment; regulated by Gcn4p, Rim101p;induced in response to amino acid starvation (3-aminotriazole treatment)
orf19.3649	0.380564	0.000290194	CAL0000409		Predicted ORF in Assemblies 19, 20 and 21
orf19.5118	0.379925	0.00013615	CAL0002512	SDS24	Protein described as similar to S. cerevisiaeYbr214wp; transcription regulated by Mig1p and Tup1p;fluconazole-induced
orf19.6968	0.379663	7.91306e-05	CAL0000346		Predicted ORF in Assemblies 19, 20 and 21; Hog1p-downregulated
orf19.7200	0.37928	6.02387e-05	CAL0003734		Predicted ORF in Assemblies 19, 20 and 21;possibly spurious ORF (Annotation Working Groupprediction)
orf19.21	0.379063	0.000116633	CAL0000519		Predicted ORF in Assemblies 19, 20 and 21
orf19.5250	0.376874	0.00114353	CAL0003563		Predicted ORF in Assemblies 19, 20 and 21
orf19.4602	0.376515	0.000266878	CAL0003583	MDH1-1	Predicted malate dehydrogenase; macrophage-induced protein
orf19.3133	0.376193	4.34299e-05	CAL0002288	GUT2	Predicted ORF in Assemblies 19, 20 and 21; Plc1p-regulated
orf19.1788	0.375346	0.000245179	CAL0000968		Predicted ORF from Assembly 19; merged with orf19.1290 in Assembly 20
orf19.2765	0.375015	7.59489e-05	CAL0004255	PGA62	Putative GPI-anchored protein; fluconazole-induced; transcriptionally regulated by iron; expressiongreater in high iron; induced during cell wallregeneration; Cyr1p or Ras1p downregulated
orf19.4961	0.374565	4.71001e-05	CAL0006359	STP2	Transcription factor; activates transcription ofgenes encoding amino acid permeases; activated via amino-acid-induced proteolytic processing (Ssy1p and Csh3pdependent); also amino-acid-regulated
orf19.1114	0.374165	0.000127171	CAL0001879		Predicted ORF in Assemblies 19, 20 and 21
orf19.3584	0.373807	0.000605233	CAL0005998		Predicted ORF from Assembly 19; merged with orf19.225 in Assembly 20
orf19.6952	0.373283	0.0008567	CAL0000298		Protein not essential for viability
orf19.2772	0.373234	0.000687951	CAL0004270	HOS3	Histone deacetylase; similar to S. cerevisiaeHos3p; greater expression and longer mRNA in white cells,compared to opaque cells; has conserved deacetylationmotif
orf19.4835	0.373126	0.000146875	CAL0005357		Predicted ORF in Assemblies 19, 20 and 21
orf19.6236	0.372398	4.26376e-05	CAL0000479		Predicted ORF in Assemblies 19, 20 and 21
orf19.59	0.371938	3.54878e-05	CAL0000609		Predicted ORF in Assemblies 19, 20 and 21
orf19.391	0.371827	5.91401e-05	CAL0004944	UPC2	Transcription factor involved in regulation ofergosterol biosynthetic genes and sterol uptake; bindsERG2 promoter; has Zn(2)-Cys(6) binuclear cluster; similarto S. cerevisiae Upc2p; fluconazole-induced;macrophage/pseudohyphal-repressed
orf19.3360	0.370873	0.000146722	CAL0004167		Predicted ORF in Assemblies 19, 20 and 21;possibly spurious ORF (Annotation Working Groupprediction)
orf19.3441	0.370051	9.40053e-05	CAL0004985	FRP6	Transcription is regulated by Nrg1p and Tup1p;regulated by Ssn6p; upregulated in the presence of humanneutrophils
orf19.173	0.36998	7.20799e-05	CAL0003208		Putative transcription factor with zinc fingerDNA-binding motif
orf19.1078	0.369923	0.000102485	CAL0001229	HBR2	Uncharacterized protein, regulated by Gcn4p andhemoglobin
orf19.2723	0.368993	8.53399e-05	CAL0004198	HIT1	Protein not essential for viability; similar toS. cerevisiae Hit1p, which is required for growth at hightemperature
orf19.2244	0.368454	3.90898e-05	CAL0006266		Similar to oxidoreductases and to S. cerevisiaeYjr096wp; transcription is negatively regulated by Sfu1p;increased transcription is observed upon benomyltreatment; decreased expression observed in an ssr1homozygous null mutant
orf19.583	0.366389	7.15099e-05	CAL0000331		Putative indoleamine 2,3-dioxygenase (IDO); IDOis the rate-limiting enzyme of tryptophan catabolism viakynurenine pathway; enzyme inhibition by 1-methyl-D,L-tryptophan causes increased hyphal growth; expressed inyeast-form cells and hyphae
orf19.7150	0.363067	5.59552e-05	CAL0002995	NRG1	Transcriptional repressor; regulates hyphalgenes, virulence genes, chlamydospore development, andgenes involved in rescue and stress responses; effectsboth Tup1p-dependent (major) and -independent (minor)regulation
orf19.7600	0.362739	0.00016823	CAF0007267	FDH3	Putative protein of glycine catabolism;downregulated by Efg1p under yeast-form but not hyphalgrowth conditions
orf19.647.3	0.36264	0.000191761	CAF0006906		ORF Predicted by Annotation Working Group
orf19.6731.1	0.361254	0.000357414	CAL0004822		Predicted ORF in Assemblies 19, 20 and 21;transcription is repressed in response to alpha pheromonein SpiderM medium
orf19.3448	0.360222	0.000133581	CAL0004997		Predicted ORF in Assemblies 19, 20 and 21;ketoconazole-repressed; possibly spurious ORF (AnnotationWorking Group prediction)
orf19.7197	0.359754	3.90898e-05	CAL0003167		Predicted ORF in Assemblies 19, 20 and 21
orf19.2841	0.359452	0.000231494	CAL0005135	PGM2	Protein not essential for viability; similar toS. cerevisiae Pgm2p, which is phosphoglucomutase
orf19.5622	0.359282	0.000312175	CAL0000583	GLC3	Protein described as similar to 1,4-glucanbranching enzyme; fluconazole-induced; shows colonymorphology-related gene regulation by Ssn6p
orf19.5010	0.359222	0.000192736	CAL0001590	DIM1	Protein likely to be essential for growth, basedon an insertional mutagenesis strategy; similar to S.cerevisiae Dim1p, which is an 18S rRNA dimethylaseinvolved in rRNA modification and processing; induced uponbiofilm formation
orf19.2686	0.35752	0.000127913	CAL0003533		Predicted ORF in Assemblies 19, 20 and 21
orf19.778	0.356929	0.000108429	CAL0001950	PIL1	Echinocandin-binding protein; localizes to cellsurface of hyphae, but not yeast-form cells; fungal-specific (no human or murine homolog)
orf19.254	0.355869	0.00015713	CAL0004007		Predicted ORF in Assemblies 19, 20 and 21; Hog1p-downregulated
orf19.1240	0.355572	0.0070895	CAL0002909		Predicted ORF in Assemblies 19, 20 and 21;fungal-specific (no human or murine homolog)
orf19.2973	0.354042	3.14895e-05	CAL0006105		Predicted ORF in Assemblies 19, 20 and 21
orf19.6873.1	0.353195	2.96401e-05	CAL0005867	RPS8A	Putative ribosomal protein; similar to S.cerevisiae Rps8Bp; gene is induced by ciclopirox olaminetreatment; genes encoding cytoplasmic ribosomal subunitsare downregulated upon phagocytosis by murine macrophage;intron in 5'-UTR
orf19.3574	0.350948	7.91306e-05	CAL0005975		Predicted ORF in Assemblies 19, 20 and 21
orf19.6091	0.350269	0.00025035	CAL0005233	RIM8	Protein involved in the pH response pathway;required for activation of the transcription factorRim101p and for alkaline pH-induced hyphal growth; showscolony morphology-related gene regulation by Ssn6p
orf19.4358	0.349702	2.9679e-05	CAL0001047		Predicted ORF in Assemblies 19, 20 and 21
orf19.4857	0.349211	3.18278e-05	CAL0005405		Predicted ORF in Assemblies 19, 20 and 21
orf19.2458	0.347068	0.000143922	CAL0001563		Putative transcription factor with zinc fingerDNA-binding motif
orf19.5326	0.346882	0.000149103	CAL0004281		Putative transcription factor with zinc fingerDNA-binding motif; possible ortholog of S. cerevisiaeMig2p
orf19.3713	0.345615	0.00014391	CAL0001098		Predicted ORF in Assemblies 19, 20 and 21;possibly spurious ORF (Annotation Working Groupprediction)
orf19.5508	0.344401	3.54878e-05	CAL0006069		Predicted ORF in Assemblies 19, 20 and 21
orf19.5544	0.34393	5.98306e-05	CAL0006165	SAC6	Transcription is regulated by Nrg1p and Mig1p
orf19.1287	0.343306	2.71658e-05	CAL0003064		Predicted ORF in Assemblies 19, 20 and 21;possibly spurious ORF (Annotation Working Groupprediction)
orf19.1704	0.342247	0.000259985	CAL0000760	FOX3	Putative peroxisomal 3-oxoacyl CoA thiolase;expression is regulated upon white-opaque switching
orf19.7187	0.3405	5.94698e-05	CAL0003133	MAM33	Predicted ORF in Assemblies 19, 20 and 21;regulated by Ssn6p
orf19.4443	0.340403	3.56422e-05	CAL0001843	YPD1	Phosphohistidine intermediate protein in aphosphorelay signal transduction pathway; residue His69 isthe phosphoacceptor histidine; predicted to be soluble andcytosolic; functional homolog of S. cerevisiae Ypd1p
orf19.154	0.339953	7.21464e-05	CAL0003149		Predicted ORF in Assemblies 19, 20 and 21
orf19.3301	0.33599	6.98621e-05	CAL0004039		Predicted ORF in Assemblies 19, 20 and 21;induced by heavy metal (cadmium) stress;Hog1p-induced
orf19.7619	0.334728	0.000513312	CAL0000826		Predicted ORF in Assemblies 19, 20 and 21
orf19.4199	0.334614	2.5059e-05	CAL0005895		Predicted ORF in Assemblies 19, 20 and 21
orf19.809	0.334137	6.98621e-05	CAL0002615		Predicted ORF in Assemblies 19, 20 and 21
orf19.1945	0.333985	0.000190575	CAL0002586	AUR1	Inositolphosphorylceramide (IPC) synthase,catalyzes the key step in the synthesis of sphingolipids;potential target for antifungal drugs; mutations conferresistance to aureobasidin A
orf19.2199	0.333978	8.26832e-05	CAL0005485	PHO86	Predicted ORF in Assemblies 19, 20 and 21;possibly adherence-induced
orf19.5372	0.333904	2.87719e-05	CAL0004373		Predicted ORF from Assembly 19; orf19.5372 and orf19.5373 are similar to the Tca2 (pCal) retrotransposon, which is present in strain hOG1042 as 50 to 100 copies of a linear dsDNA; removed from Assembly 20; transcription is Tbf1p-activated
orf19.6586	0.333666	0.00015713	CAL0003313		Predicted ORF in Assemblies 19, 20 and 21;increased transcription is observed upon benomyl treatmentor in an azole-resistant strain that overexpresses MDR1;shows colony morphology-related gene regulation by Ssn6p;induced by nitric oxide, 17-beta-estradiol
orf19.4906	0.332856	4.92015e-05	CAL0006203		Predicted ORF in Assemblies 19, 20 and 21
orf19.7118	0.332849	0.000116843	CAL0002851		Predicted ORF in Assemblies 19, 20 and 21
orf19.3831	0.332222	7.59344e-05	CAL0002023		Predicted ORF in Assemblies 19, 20 and 21
orf19.4657	0.332066	3.18278e-05	CAL0003729		Predicted ORF in Assemblies 19, 20 and 21
orf19.111	0.331152	0.00011981	CAL0002992	CAN2	Putative amino acid permease; transcription isregulated by Nrg1p and Tup1p; caspofungin induced;flucytosine induced; shows colony morphology-related generegulation by Ssn6p; ; fungal-specific (no human or murinehomolog)
orf19.7332	0.330673	3.99694e-05	CAL0004603	ELF1	Protein required for wild-type morphology,growth; Walker A and B (ATP/GTP binding) motifs, ABCtransporter consensus; expressed in hyphal, pseudohyphal,and yeast form, upregulated in biofilm; S. pombe homologis ABC ATPase of mRNA export
orf19.6529	0.330459	3.15321e-05	CAL0003131	CDC34	Transcription is regulated by Nrg1p and Tup1p,and by Gcn2p and Gcn4p
orf19.1486	0.328587	0.000178245	CAL0004738		Predicted ORF in Assemblies 19, 20 and 21;possibly spurious ORF (Annotation Working Groupprediction)
orf19.1961	0.328023	2.05384e-05	CAL0002634		Predicted ORF in Assemblies 19, 20 and 21
orf19.3931	0.325418	0.00238333	CAL0002928	SFC1	Alkaline upregulated
orf19.353	0.324938	0.0093662	CAL0004825	ULP1	Putative SUMO deconjugation enzyme that cleavesthe small ubiquitin-like modifier (SUMO) off proteins
orf19.2966	0.324488	0.000151247	CAL0006082		Predicted ORF in Assemblies 19, 20 and 21
orf19.2242	0.323559	5.81189e-05	CAL0006263	PRB1	Putative endoprotease B; regulated by heat,carbon source (GlcNAc-induced), nitrogen, macrophageresponse, human neutrophils; putative D200-H232-S389catalytic triad; similar to (but does not replace) S.cerevisiae vacuolar B protease Prb1p
orf19.2515	0.322592	9.59488e-05	CAL0002389		Predicted ORF in Assemblies 19, 20 and 21
orf19.6731	0.321834	1.64809e-05	CAF0007086		ORF Predicted by Annotation Working Group
orf19.562	0.321398	7.43752e-05	CAL0000265	FGR13	Protein lacking an ortholog in S. cerevisiae;transposon mutation affects filamentous growth; possiblyspurious ORF (Annotation Working Group prediction)
orf19.4416	0.320999	2.889e-05	CAL0001755	VPS13	Predicted ORF in Assemblies 19, 20 and 21; geneused for multilocus sequence typing
orf19.4892	0.320192	2.47799e-05	CAL0005520	TPK1	Catalytic subunit of cAMP-dependent proteinkinase (PKA), isoform of Tpk2p; involved in control ofmorphogenesis and stress response; wild-type nuclearlocalization requires Bcy1p; produced during stationarybut not exponential growth
orf19.3822	0.319469	2.66574e-05	CAL0001985	SCS7	Protein described as ceramide hydroxylase;transcription is regulated by Nrg1p; transcriptionallyregulated by iron; expression greater in high iron;fluconazole-induced
orf19.3682	0.318651	1.63961e-05	CAL0000465	CWH8	Putative dolichyl pyrophosphate (Dol-P-P)phosphatase; ketoconazole-induced; expression is increasedin a fluconazole-resistant isolate
orf19.3644	0.318201	7.51654e-05	CAL0000403		Predicted ORF in Assemblies 19, 20 and 21;greater mRNA abundance observed in a cyr1 homozygous nullmutant than in wild type
orf19.4150	0.318191	8.77204e-05	CAL0005739		Predicted ORF in Assemblies 19, 20 and 21;induced by nitric oxide
orf19.1029	0.315362	4.35677e-05	CAL0001088		Predicted ORF in Assemblies 19, 20 and 21
orf19.1027	0.314623	2.25876e-05	CAL0001086	PDR16	Phosphatidylinositol transfer protein; increasedtranscription correlates with CDR1 and CDR2 overexpressionand azole resistance; induced by fluphenazine, 17-beta-estradiol, ethynyl estradiol, nitric oxide; farnesol-downregulated in biofilm
orf19.398	0.31343	0.000108261	CAL0004963		Predicted ORF in Assemblies 19, 20 and 21;possibly spurious ORF (Annotation Working Groupprediction)
orf19.3967	0.312579	0.00391164	CAL0003055	PFK1	Alpha subunit of phosphofructokinase (PFK),which is Pfk1p, Pfk2p heteromultimer; PFK is activated byfructose 2,6-bisphosphate or AMP, inhibited by ATP;activity reduced on hyphal induction; phagocytosis-downregulated; fluconazole-induced
orf19.1034	0.312339	7.91306e-05	CAL0001120		Predicted ORF in Assemblies 19, 20 and 21;caspofungin repressed
orf19.1607	0.311663	3.27867e-05	CAL0006317	ALR1	Putative transporter of divalent cations; hyphal-induced expression; fungal-specific (no human or murinehomolog)
orf19.4436	0.309264	0.000148665	CAL0001814		Predicted ORF in Assemblies 19, 20 and 21
orf19.693	0.307513	2.59129e-05	CAL0001164		Predicted ORF in Assemblies 19, 20 and 21
orf19.1852	0.307315	0.000164344	CAL0001691		Predicted ORF in Assemblies 19, 20 and 21
orf19.5615	0.30486	0.00120537	CAL0000562	AYR2	Predicted ORF in Assemblies 19, 20 and 21; showscolony morphology-related gene regulation by Ssn6p
orf19.3443	0.304223	2.90155e-05	CAL0004989	OYE2	Putative NAPDH dehydrogenase; fungal-specific(no human or murine homolog); induced by nitric oxide
orf19.4887	0.303898	0.000843631	CAL0005504	ECM21	Protein not essential for viability; similar toS. cerevisiae Ecm21p (may have cell wall role); alkalineupregulated by Rim101p; fluconazole induced; caspofunginrepressed; downregulated in azole-resistant strainoverexpressing MDR1
orf19.494	0.302191	2.09813e-05	CAL0005870		Predicted ORF in Assemblies 19, 20 and 21
orf19.409	0.301295	2.09813e-05	CAL0005548		Predicted membrane protein; similar to S.cerevisiae Ynr018Wp
orf19.7350	0.299741	3.82977e-05	CAL0004665		Predicted ORF in Assemblies 19, 20 and 21;soluble protein in hyphae; fluconazole-induced; greatermRNA abundance observed in a cyr1 or ras1 homozygous nullmutant than in wild type and decreased mRNA abundanceobserved in an efg1 homozygous null mutant; regu
orf19.5525	0.299631	4.12093e-05	CAL0006116		Protein abundance is affected by URA3 expressionin the CAI-4 strain background; regulated by Efg1p andEfh1p; repressed by Rgt1p
orf19.1357	0.299024	3.29796e-05	CAL0003863	FCY21	High affinity, high capacity, hypoxanthine-adenine-guanine-cytosine/ H+ symporter; purine-cytosinepermease of pyrimidine salvage; similar to S. cerevisiaeFcy2p
orf19.5845	0.298134	0.000547676	CAL0002354		Protein described as large subunit ofribonucleotide reductase; transcriptionally regulated byiron; expression greater in low iron
orf19.7021	0.297748	2.46697e-05	CAL0001970	GPH1	Putative glycogen phosphorylase; gene regulatedby Ssk1p, Mig1p, and Tup1p; fluconazole-induced; localizesto cell surface of hyphal cells, but not yeast-form cells;S. cerevisiae Gph1p is a stress-regulated protein ofglycogen metabolism
orf19.4599	0.297571	0.000169164	CAL0002956	PHO89	Putative phosphate permease; expression isregulated upon white-opaque switching; alkalineupregulated by Rim101p; induced upon biofilm formation;possibly adherence-induced
orf19.3575	0.297488	9.05687e-05	CAL0005977	CDC19	Putative pyruvate kinase; on yeast-form cellsurface; soluble in hyphae; antigenic; Gcn4p, Hog1pregulated; induced on polystyrene adherence; downregulatedupon phagocytosis; mutation affects filamentation
orf19.5117	0.295882	1.17697e-05	CAL0002511	OLE1	Fatty acid desaturase (stearoyl-CoA desaturase),essential protein involved in oleic acid synthesis;required for aerobic hyphal growth and chlamydosporeformation; subject to hypoxic regulation; fluconazole-induced; caspofungin repressed
orf19.285	0.294694	2.46697e-05	CAL0004087		Predicted ORF in Assemblies 19, 20 and 21
orf19.29	0.293473	3.66842e-05	CAL0000527		Predicted ORF in Assemblies 19, 20 and 21
orf19.4125	0.291517	1.16992e-05	CAL0005633		Putative transcription factor with zinc fingerDNA-binding motif
orf19.3712	0.291378	0.00020029	CAL0001096		Predicted ORF in Assemblies 19, 20 and 21
orf19.4947	0.291083	2.43224e-05	CAL0006307		Predicted ORF in Assemblies 19, 20 and 21
orf19.5069	0.291064	1.38025e-05	CAL0001727		Predicted ORF in Assemblies 19, 20 and 21
orf19.1799	0.290678	1.18422e-05	CAL0001002		Putative general amino acid permease; fungal-specific (no human or murine homolog)
orf19.7374	0.290297	2.46697e-05	CAL0004760	CTA4	Activates transcription in 1-hybrid assay in S.cerevisiae; gene is downregulated upon adherence topolystyrene; induced by nitric oxide
orf19.941	0.289289	2.082e-05	CAL0003685	SEC14	Essential protein; functional homolog of S.cerevisiae Sec14p, which is a Golgiphosphatidylinositol/phosphatidylcholine transfer proteinthat regulates choline-phosphate cytidyltransferase andthereby affects secretion; biofilm-regulated
orf19.5605	0.288786	0.000257234	CAL0000534		Predicted ORF in Assemblies 19, 20 and 21;fungal-specific (no human or murine homolog)
orf19.158	0.287545	2.09813e-05	CAL0003160		Predicted ORF in Assemblies 19, 20 and 21
orf19.5636	0.287285	3.72613e-05	CAL0000618	RBT5	GPI-anchored cell wall protein; has CRoW motif,not required for filamentous growth; expression isregulated by Rfg1p, Rim101p; repressed by Sfu1p, Hog1p,Tup1p; induced by serum, iron, alkaline pH, ketoconazole,or ciclopirox olamine
orf19.2309	0.287122	2.75137e-05	CAF0006944		ORF Predicted by Annotation Working Group
orf19.2179	0.28596	1.63961e-05	CAF0006939	RPS10	Predicted ribosomal protein; downregulated inthe presence of human whole blood or polymorphonuclear(PMN) cells
orf19.2248	0.283547	5.94698e-05	CAL0006272	ARE2	Acyl CoA:sterol acyltransferase (ASAT); usescholesterol and oleoyl-CoA substrates; protoberberinederivative drug inhibits enzyme activity; 7 putativetransmembrane regions; ketoconazole-induced
orf19.1362	0.282773	7.32008e-05	CAL0003882		Predicted ORF in Assemblies 19, 20 and 21
orf19.1963	0.282733	1.0998e-05	CAL0002635		Predicted ORF in Assemblies 19, 20 and 21
orf19.3220	0.282458	8.79628e-05	CAL0003244		Predicted ORF in Assemblies 19, 20 and 21
orf19.171	0.281868	1.2233e-05	CAL0003204	DBP2	Predicted ORF in Assemblies 19, 20 and 21;flucytosine induced; downregulated in core stressresponse
orf19.5431	0.281711	3.54878e-05	CAL0005229		Predicted ORF in Assemblies 19, 20 and 21
orf19.2604	0.280503	1.17714e-05	CAL0003354		Predicted ORF in Assemblies 19, 20 and 21
orf19.5280	0.279891	1.80453e-05	CAL0003639	MUP1	Alkaline upregulated by Rim101p
orf19.2501	0.277873	1.33723e-05	CAL0002353	FLC1	Protein involved in heme uptake; putative FADtransporter, similar to S. cerevisiae Flc1p; regulated byiron; macrophage-induced gene; mutant shows defect infilamentous growth
orf19.1783	0.277793	1.83998e-05	CAL0000963	YOR1	Protein similar to S. cerevisiae Yor1p, which isa plasma membrane transporter of the ATP-binding cassette(ABC) family involved in resistance to aureobasidin A;transcription is specific to white cell type
orf19.7451	0.276194	1.73316e-05	CAL0005577	FUN31	Protein not essential for viability; similar toS. cerevisiae Psk1p, which is a putative serine/threonineprotein kinase
orf19.54	0.276031	7.18676e-05	CAL0000604	RHD1	Putative transmembrane protein with hydrophobicN and C termini and a Ser-Gly rich region; transcriptionis decreased upon yeast-hyphal switch; expression isregulated upon white-opaque switching
orf19.6472	0.269792	9.15196e-06	CAL0002277	CYP1	Peptidyl-propyl cis-trans isomerase (PPIase);activity is cyclosporin A sensitive; soluble protein inhyphae; downregulated upon treatment of biofilm withfarnesol; macrophage-induced protein
orf19.2114	0.26972	0.000967588	CAL0005280		Predicted ORF in Assemblies 19, 20 and 21
orf19.4280	0.269216	1.05325e-05	CAL0000343		Predicted ORF in Assemblies 19, 20 and 21;possibly spurious ORF (Annotation Working Groupprediction)
orf19.6058	0.269202	2.90155e-05	CAL0005149	GLO1	Predicted ORF in Assemblies 19, 20 and 21;oxidative stress-induced via Cap1p
orf19.23	0.268566	9.54542e-05	CAL0000521	RTA3	Similar to S. cerevisiae Rta1p (role in 7-aminocholesterol resistance) and Rsb1p (flippase);putative membrane protein; putative drug-responsiveregulatory site; induced by fluphenazine, estradiol,ketoconazole, caspofungin
orf19.7566	0.265642	3.15321e-05	CAL0000137		Predicted ORF in Assemblies 19, 20 and 21;alkaline upregulated by Rim101p; fungal-specific (no humanor murine homolog)
orf19.5911	0.264514	2.21586e-05	CAL0003264	CMK1	Expression is regulated upon white-opaqueswitching; biochemically purified Ca2+/CaM-dependentkinase is soluble, cytosolic, monomeric, and serine-autophosphorylated
orf19.1978	0.263775	8.97479e-05	CAL0002675	GIT2	Putative glycerophosphoinositol permease; fungal-specific (no human or murine homolog); transcription isrepressed in response to alpha pheromone in SpiderMmedium
orf19.6640	0.263059	0.00053849	CAL0004028	TPS1	Trehalose-6-phosphate synthase; required fortrehalose synthesis; role in hyphal growth and virulencein a mouse systemic infection; upregulated in the presenceof human neutrophils; macrophage/pseudohyphal-repressedafter 16 h
orf19.5812	0.262732	2.61743e-05	CAL0002272		Predicted ORF in Assemblies 19, 20 and 21
orf19.1756	0.260203	1.17697e-05	CAL0000872	GPD1	Protein similar to S. cerevisiae glycerol-3-phosphate dehydrogenase (enzyme of glycerol biosynthesis);biofilm-induced expression; regulated by Efg1p; regulatedby Tsa1p, Tsa1Bp under H2O2 stress conditions
orf19.6070	0.258292	2.082e-05	CAL0005183	ENA2	Described as sodium transporter; transcriptionis upregulated in response to treatment with ciclopiroxolamine; alkaline upregulated by Rim101p; repressed uponhigh-level peroxide stress
orf19.320	0.25813	1.26054e-05	CAL0004696		Predicted ORF in Assemblies 19, 20 and 21
orf19.6769	0.257845	1.81971e-05	CAL0004930		Predicted ORF in Assemblies 19, 20 and 21
orf19.6992	0.257685	6.90317e-05	CAL0000412		Predicted ORF in Assemblies 19, 20 and 21
orf19.7085	0.256865	0.00136436	CAL0002175		Predicted ORF in Assemblies 19, 20 and 21;induced in core stress response; induced by heavy metal(cadmium) stress via Hog1p; oxidative stress-induced viaCap1p; macrophage-downregulated gene
orf19.3117	0.253678	0.000213612	CAF0006972	CSA2	Predicted ORF in Assemblies 19, 20 and 21;downregulated by Rim101p at pH 8; regulated by Tsa1p,Tsa1Bp in minimal media at 37 deg; induced by ketoconazoleand nitric oxide
orf19.5180	0.251092	0.000859088	CAL0002689		Protein described as a putative cysteineperoxidase; transcriptionally induced by interaction withmacrophage; fluconazole induced; Fkh2p-downregulated;caspofungin repressed
orf19.6470	0.251062	1.82854e-05	CAL0002274	AHP2	Predicted ORF in Assemblies 19, 20 and 21;macrophage-downregulated gene
orf19.5908	0.250924	5.86404e-05	CAL0003246	TEC1	TEA/ATTS transcription factor involved inregulation of hypha-specific genes; required for wild-typebiofilm formation; regulates BCR1; directlytranscriptionally regulated by Cph2p under some growthconditions; alkaline upregulated
orf19.6947	0.24878	4.13582e-05	CAL0000275		Predicted ORF in Assemblies 19, 20 and 21;induced by nitric oxide
orf19.6081	0.248663	0.000184036	CAL0005209	PHR2	Glycosidase; role in cell wall structure; mayact on beta-1,3-glucan prior to beta-1,6-glucan linkage;role in vaginal but not systemic virulence (low pH, notneutral); low pH, high iron, fluconazole induced; Rim101p-downregulated at pH 8
orf19.4688	0.247999	0.000655361	CAL0003828	DAG7	Predicted ORF in Assemblies 19, 20 and 21; a-specific transcription; alpha-factor induced
orf19.7214	0.246077	4.10518e-05	CAL0003768		Protein described as similar to glucan 1,3-beta-glucosidase; regulated by Nrg1p, Tup1p; possibly regulatedby Tac1p; induced upon biofilm formation; induced bynitric oxide; induced during cell wall regeneration
orf19.699	0.244827	4.05094e-05	CAL0001177		Predicted ORF in Assemblies 19, 20 and 21
orf19.2724	0.2436	5.8216e-06	CAL0004199		Predicted ORF in Assemblies 19, 20 and 21
orf19.2374	0.242381	6.21451e-06	CAL0000785		Predicted ORF from Assembly 19; removed from Assembly 20
orf19.542	0.242276	1.06842e-05	CAF0006900		ORF Predicted by Annotation Working Group
orf19.6877	0.241669	6.08941e-06	CAL0005876		Predicted ORF in Assemblies 19, 20 and 21;transcription is upregulated in response to treatment withcaspofungin, ciclopirox olamine or ketoconazole; gene ofcore caspofungin response
orf19.5282	0.2415	2.5059e-05	CAL0003643		Predicted ORF in Assemblies 19, 20 and 21;decreased expression in hyphae compared to yeast-formcells; regulated by Efg1p and Efh1p; intron in 5'-UTR
orf19.5286	0.240934	1.09488e-05	CAL0003651	YCP4	Putative flavodoxin; fungal-specific (no humanor murine homolog)
orf19.4792	0.240036	7.06413e-06	CAL0004610		Predicted ORF in Assemblies 19, 20 and 21; Plc1p-regulated; possibly spurious ORF (Annotation Working Groupprediction)
orf19.3507	0.239386	6.21451e-06	CAL0005780	MCR1	Protein described as NADH-cytochrome-b5reductase; soluble protein in hyphae; alkalinedownregulated; ketoconazole or flucytosine induced
orf19.6691	0.239322	8.93874e-06	CAL0004147		Predicted ORF in Assemblies 19, 20 and 21
orf19.4088	0.235621	3.3648e-05	CAL0004940		Predicted ORF in Assemblies 19, 20 and 21
orf19.6659	0.235043	1.18608e-05	CAL0004074	GAP6	Putative general amino acid permease; Plc1p-regulated; Gcn4p-regulated; fungal-specific (no human ormurine homolog)
orf19.94	0.234734	5.60118e-06	CAL0000706		Predicted ORF in Assemblies 19, 20 and 21
orf19.6548	0.234244	8.68475e-06	CAL0003195	ISU1	Similar to NifU; possible role in iron-sulfurcluster biogenesis; transcriptionally regulated by iron;expression greater in low iron
orf19.5112	0.233812	2.04175e-05	CAL0002508	TKL1	Putative transketolase; localizes to surface ofyeast-form cells, but not hyphae; soluble protein inhyphae; transcription is regulated by Nrg1p, Mig1p, andTup1p; antigenic in human or murine infection
orf19.1187	0.229334	6.21451e-06	CAL0002132	CPH2	Transcriptional activator of hyphal growth; MycbHLH family: directly regulates Tec1p, which regulateshypha-specific genes; probably homodimeric,phosphorylated; enhances S. cerevisiae nitrogen starvation-induced pseudohyphal growth
orf19.1785	0.229317	0.000100667	CAL0000965		Predicted ORF in Assemblies 19, 20 and 21
orf19.6580	0.228585	8.73958e-06	CAL0003298		Predicted ORF in Assemblies 19, 20 and 21;possibly spurious ORF (Annotation Working Groupprediction)
orf19.6757	0.22847	6.98621e-05	CAL0004896		Predicted ORF in Assemblies 19, 20 and 21
orf19.4698	0.228454	4.79153e-06	CAL0003860		Predicted ORF in Assemblies 19, 20 and 21
orf19.2030	0.22804	1.47541e-05	CAL0004376		Predicted ORF in Assemblies 19, 20 and 21;greater mRNA abundance observed in a cyr1 or ras1homozygous null mutant than in wild type
orf19.868	0.227884	1.23369e-05	CAL0002823	ADAEC	Transcription is specific to white cell type
orf19.6527	0.224909	2.082e-05	CAL0003125		Predicted ORF in Assemblies 19, 20 and 21; showscolony morphology-related gene regulation by Ssn6p
orf19.655	0.224546	0.000160263	CAL0001031	PHO84	Protein similar to high-affinity phosphatetransporters; expression is regulated upon white-opaqueswitching or biofilm formation; Hog1p, ciclopirox olamineor alkaline induced; caspofungin or stress repressed;possibly adherence induced
orf19.986	0.223876	2.889e-05	CAL0003813	GLY1	L-threonine aldolase; possibly tetrameric;complements the glycine auxotrophy of an S. cerevisiaeshm1 null shm2 null gly1-1 triple mutant;macrophage/pseudohyphal-induced; the GLY1 locus has anRFLP and is triploid in strain SGY269
orf19.6770	0.22316	7.59489e-05	CAL0004943		Predicted ORF in Assemblies 19, 20 and 21
orf19.4617	0.219962	9.82622e-06	CAL0003617		Predicted ORF in Assemblies 19, 20 and 21
orf19.903	0.218211	7.91306e-05	CAL0003574	GPM1	Protein described as phosphoglycerate mutase;enzyme of glycolysis; antigenic during murine, humaninfection; biofilm-, fluconazole-, or amino acidstarvation (3-aminotriazole treatment) induced; regulatedby Efg1p, Gcn4p
orf19.1891	0.217261	6.08307e-06	CAL0001825	2008-04-01	Vacuolar aspartic proteinase; mRNA abundance isequivalent in yeast-form and mycelial cells but iselevated at lower growth temperatures; upregulated in thepresence of human neutrophils
orf19.646	0.217017	3.61757e-06	CAL0001010	GLN1	Protein described as similar to glutamatesynthase; regulated by Tsa1p, Tsa1Bp under H2O2 stressconditions
orf19.813	0.216549	3.33611e-06	CAL0002644		Predicted ORF in Assemblies 19, 20 and 21; notessential for viability; oxidative stress-induced viaCap1p; similar to S. cerevisiae Vhs3p, which is a putativephosphopantothenoylcysteine decarboxylase
orf19.882	0.216343	2.33545e-05	CAL0002893	HSP78	Protein described as a heat-shock protein;transcriptionally regulated by macrophage response;transcription is regulated by Nrg1p, Mig1p, Gcn2p, Gcn4p;heavy metal (cadmium) stress-induced
orf19.5348	0.216297	2.04175e-05	CAL0004319	TPS3	Protein described as regulatory subunit oftrehalose-phosphate synthase; regulated by Efg1p; biofilm-repressed expression; regulated by Tsa1p, Tsa1Bp underH2O2 stress conditions
orf19.2969	0.216237	2.38952e-05	CAL0006085	RAD16	Protein similar to S. cerevisiae Rad16p;flucytosine induced
orf19.3110	0.216007	1.7433e-05	CAL0002229		Predicted ORF in Assemblies 19, 20 and 21
orf19.951	0.215117	3.53107e-06	CAL0003712		Predicted ORF in Assemblies 19, 20 and 21;transcription downregulated upon yeast-hyphal switch;fluconazole-induced; possibly spurious ORF (AnnotationWorking Group prediction)
orf19.6996	0.213363	2.46697e-05	CAL0000417		Predicted ORF in Assemblies 19, 20 and 21
orf19.1632	0.211079	9.15196e-06	CAL0006399		Predicted ORF in Assemblies 19, 20 and 21
orf19.5192	0.210561	7.06452e-05	CAL0002726		Predicted ORF from Assembly 19; removed from Assembly 20
orf19.5663	0.208122	7.16689e-05	CAL0000690		Predicted ORF in Assemblies 19, 20 and 21
orf19.1802	0.207571	8.06266e-06	CAL0001575		Predicted ORF in Assemblies 19, 20 and 21
orf19.7313	0.207384	3.819e-05	CAL0004538	SSU1	Protein similar to S. cerevisiae Ssu1p sulfitetransport protein; transposon mutation affects filamentousgrowth; regulated by Gcn2p and Gcn4p; induced by nitricoxide
orf19.6706	0.206577	2.50193e-05	CAL0004710	GYP7	Predicted ORF in Assemblies 19, 20 and 21;similar to S. cerevisiae Gyp7p (GTPase-activating proteinfor Ypt1p); caspofungin-induced
orf19.2613	0.204952	3.42944e-06	CAL0003379	ECM4	Protein similar to S. cerevisiae Ecm4p;transcription is regulated by Nrg1p and Tup1p; induced incore stress response or in cyr1 or ras1 homozygous nullmutant (yeast-form or hyphal cells); transposon mutationaffects filamentous growth
orf19.550	0.204889	1.63028e-05	CAL0000228	PDX3	Transcription is regulated upon yeast-hyphalswitch; regulated by Nrg1p, Mig1p, and Tup1p; caspofunginrepressed
orf19.4309	0.203259	1.4072e-05	CAL0000895	GRP2	Similar to S. cerevisiae Gre2p (methylglyoxalreductase); antigenic in human; regulation associated withazole resistance; induced in core stress response or byoxidative stress (via Cap1p), fluphenazine, benomyl, orfluconazole (long term)
orf19.5059	0.202777	5.82321e-06	CAL0001690	GCS1	Gamma-glutamylcysteine synthetase; enzyme ofglutathione synthesis; similar to Hansenula polymorphaGsh2p; induced on early/intermediate biofilm formation, inlow iron, H2O2, Cd, or presence of human neutrophils;possibly adherence-induced
orf19.3278	0.202716	2.56402e-05	CAL0003394	GSY1	Protein described as glycogen synthase; enzymeof glycogen metabolism; transcription downregulated uponyeast-hyphal switch and regulated by Efg1p; strongoxidative stress induced; shows colony morphology-relatedgene regulation by Ssn6p
orf19.1800	0.202622	3.33611e-06	CAL0001572		Predicted ORF in Assemblies 19, 20 and 21
orf19.1676	0.202054	1.83998e-05	CAL0000109		Predicted ORF in Assemblies 19, 20 and 21
orf19.451	0.201837	1.73582e-05	CAF0007424	SOK1	Transcription is induced in response to alphapheromone in SpiderM medium
orf19.3670	0.201352	0.000108513	CAL0000446	GAL1	Galactokinase; transcription regulated bygalactose; transcription regulated by Mig1p and Tup1p; notrequired for systemic mouse virulence; farnesol-downregulated in biofilm; fluconazole-induced
orf19.3684	0.200051	0.000352609	CAL0000467		Predicted ORF in Assemblies 19, 20 and 21
orf19.7437	0.199933	3.42944e-06	CAL0005517		Predicted ORF in Assemblies 19, 20 and 21
orf19.2474	0.199675	1.24619e-05	CAL0001608	PRC3	Transcription is regulated by Nrg1p and Mig1p;regulated by Gcn2p and Gcn4p
orf19.691	0.197852	3.69594e-05	CAL0001161	GPD2	Similar to glycerol 3-P dehydrogenases;regulated by Ssn6p (colony morphology-related), Nrg1p,Efg1p; induced upon osmotic and oxidative stress (viaHog1p), cell wall regeneration, macrophage/pseudohyphalgrowth, core stress response
orf19.4555	0.196937	0.000627827	CAL0002789	ALS4	ALS family protein; role in adhesion and wild-type germ tube induction; growth and temperatureregulated; expressed during infection of human buccalepithelial cells; down-regulated upon vaginal contact;putative GPI-anchored
orf19.3618	0.195555	0.000483876	CAL0000321	YWP1	Protein with suggested role in dispersal inhost; mutation causes increased adhesion and biofilmformation; putative GPI-anchor; cell wall and secreted;has stable propeptide; regulated by growth phase,phosphate, Ssk1p, Ssn6p, Efg1p, Efh1p
orf19.2341	0.195001	2.46697e-05	CAL0000734		Predicted ORF in Assemblies 19, 20 and 21
orf19.750	0.192292	9.9353e-05	CAL0001860		Predicted ORF in Assemblies 19, 20 and 21;possibly spurious ORF (Annotation Working Groupprediction)
orf19.6540	0.191461	5.22923e-06	CAL0003180	PFK2	Beta subunit of phosphofructokinase (PFK), whichis a heteromultimer of Pfk1p and Pfk2p; PFK is activatedby fructose 2,6-bisphosphate or AMP, inhibited by ATP;downregulated upon phagocytosis or hyphal growth;fluconazole-induced
orf19.223	0.187769	8.07967e-06	CAL0003919		Predicted ORF in Assemblies 19, 20 and 21
orf19.4000	0.186944	4.99213e-06	CAL0004635		Predicted ORF in Assemblies 19, 20 and 21
orf19.7481	0.186666	0.000355973	CAL0005697	MDH1	Protein described as malate dehydrogenase,mitochondrial; transcription regulated by Mig1p and Tup1p,white-opaque switching; expression greater in high iron;regulated upon phagocytosis; antigenic during murine orhuman infection
orf19.909	0.185967	1.06842e-05	CAL0003582	STP4	Putative transcription factor with zinc fingerDNA-binding motif; induced in core caspofungin response;shows colony morphology-related gene regulation by Ssn6p;induced by 17-beta-estradiol, ethynyl estradiol
orf19.1797	0.184984	3.61639e-06	CAL0001000		Predicted ORF in Assemblies 19, 20 and 21;induced upon biofilm formation; has GutQ domain, which isassociated with phosphosugar binding
orf19.4752	0.184947	1.16829e-05	CAL0004476	MSN4	Putative transcription factor; zinc finger DNA-binding motif; similar to S. cerevisiae Msn4p, but not asignificant stress response regulator in C. albicans;partly complements STRE-activation defect of S. cerevisiaemsn2 msn4 double mutant
orf19.1433	0.182373	2.04175e-05	CAL0004553		Predicted ORF in Assemblies 19, 20 and 21; showscolony morphology-related gene regulation by Ssn6p
orf19.3803	0.18225	9.06173e-05	CAL0001902	MNN22	Protein described as similar to Golgi alpha-1,2-mannosyltransferase; regulated by Tsa1p, Tsa1Bp in minimalmedia at 37 deg; Hog1p-induced; induced by nitric oxide;downregulated in core stress response
orf19.2896	0.180738	5.88077e-05	CAL0005253	SOU1	Enzyme involved in utilization of L-sorbose; hassorbitol dehydrogenase, fructose reductase, and sorbosereductase activities; has NAD-binding site motif;transcriptional regulation affected by chromosome 5 copynumber
orf19.5078	0.180735	8.74217e-06	CAL0001761		Predicted ORF in Assemblies 19, 20 and 21
orf19.6771	0.180017	3.47208e-06	CAL0004945	UBI4	Ubiquitin precursor (polyubiquitin), containsthree tandem repeats of the ubiquitin peptide that areprocessed to individual units; transcription is induced bystress; mRNA found in yeast-form and mycelial cells atsimilar abundance
orf19.7314	0.178821	8.93874e-06	CAL0004539	CDG1	Protein described as similar to cysteinedioxygenases; expression is regulated upon white-opaqueswitching
orf19.2769	0.17712	2.31086e-06	CAL0004259		Predicted ORF in Assemblies 19, 20 and 21;hyphal-induced expression; greater mRNA abundance observedin a cyr1 or ras1 homozygous null mutant than in wildtype
orf19.3364	0.175211	4.99213e-06	CAL0004173		Predicted ORF in Assemblies 19, 20 and 21;possibly spurious ORF (Annotation Working Groupprediction)
orf19.744	0.175197	2.09813e-05	CAL0001834	GDB1	Putative glycogen debranching enzyme; expressionis regulated upon white-opaque switching; regulated byNrg1p, Tup1p
orf19.1415	0.174239	2.34311e-05	CAL0004487	FRE10	Major cell-surface ferric reductase under low-iron conditions; 7 transmembrane regions and a secretionsignal predicted; repressed by Tup1p, Rim101p, Ssn6p,Hog1p, caspofungin; ciclopirox olamine induced; notrequired for filamentous growth
orf19.4871	0.172316	3.22038e-06	CAL0005461	ERO1	Protein described as similar to protein withrole in formation of disulfide bonds in the endoplasmicreticulum; fluconazole-induced
orf19.7247	0.171109	1.99019e-06	CAL0003879	RIM101	Transcription factor involved in alkaline pHresponse; required for alkaline-induced hyphal growth;role in virulence in mouse systemic infection; activatedby C-terminal proteolytic cleavage; mediates both positiveand negative regulation
orf19.1193	0.1708	2.54122e-06	CAL0002160	GNP1	Protein described as similar to asparagine andglutamine permease; fluconazole or caspofungin induced;transcription is regulated by Nrg1p, Mig1p, Tup1p, Gcn2p,Gcn4p, and alkaline regulated by Rim101p; fungal-specific
orf19.6882	0.170783	2.31086e-06	CAF0007090		ORF Predicted by Annotation Working Group
orf19.1652	0.170192	1.46782e-05	CAL0000034	POX1-3	Predicted acyl-CoA oxidase; farnesol regulated
orf19.5813	0.168546	2.15585e-06	CAL0002273		Predicted ORF in Assemblies 19, 20 and 21
orf19.4898	0.168509	7.27526e-06	CAL0005529		Predicted ORF in Assemblies 19, 20 and 21
orf19.3145.4	0.167193	1.24712e-05	CAF0007107		ORF Predicted by Annotation Working Group; removed from Assembly 20
orf19.3139	0.167108	6.36015e-06	CAL0002296		Predicted ORF in Assemblies 19, 20 and 21;increased transcription is observed upon benomyltreatment; oxidative stress-induced via Cap1p
orf19.97	0.161928	3.73563e-06	CAL0000709	CAN1	Amino acid permease, transports basic aminoacids; complements lysine transport mutation; contains 10predicted transmembrane regions and 3 predicted N-glycosylation sites; transcriptionally induced uponphagocytosis by macrophage
orf19.3839	0.16106	2.58197e-06	CAL0002041	SAP10	Secreted aspartyl proteinase; roles in adhesion,virulence (RHE model), cell surface integrity; distinctspecificity from Sap9p; at cell membrane and wall; GPI-anchored; N-glycosylated; expression greater in low iron
orf19.1847	0.160823	4.0682e-05	CAL0001679	ARO10	Protein described as pyruvate decarboxylase;alkaline downregulated; protein abundance is affected byURA3 expression in the CAI-4 strain background
orf19.1509	0.160627	1.40702e-05	CAL0005393	ROD1	Protein not essential for viability; similar toS. cerevisiae Rod1p, which is a membrane protein with arole in drug tolerance; repressed by Rgt1p
orf19.535	0.160584	8.95573e-05	CAL0000162	RBR1	Glycosylphosphatidylinositol (GPI)-anchored cellwall protein required for filamentous growth at acidic pH;expression is repressed by Rim101p and activated by Nrg1p
orf19.3672	0.158332	3.42944e-06	CAL0000448	GAL10	UDP-glucose 4-epimerase, required for galactoseutilization; mutant shows cell wall defects and increasedfilamentation; fluconazole-induced
orf19.3888	0.15691	2.8805e-06	CAF0006999		ORF Predicted by Annotation Working Group
orf19.5797	0.156038	3.53107e-06	CAL0001556	PI-PLC	Phosphatidylinositol (PtdIns)-specificphospholipase C (PI-PLC); predicted type 2 membraneprotein; role in, and regulated by, filamentation, Nrg1pand Tup1p; no mouse systemic virulence role; orf19.5797and orf19.1586 are almost identical
orf19.5334	0.154299	3.03971e-06	CAL0004295		Predicted ORF in Assemblies 19, 20 and 21;transcription regulated upon yeast-hyphal switch
orf19.2023	0.154122	6.56551e-06	CAL0004358	HGT7	Putative glucose transporter, major facilitatorsuperfamily; glucose-, fluconazole-, Snf3p-induced,expressed at high glucose; upregulated in biofilm; C.albicans glucose transporter family comprises 20 members;12 TM regions predicted
orf19.2308	0.1539	1.62327e-06	CAL0000651		Predicted ORF in Assemblies 19, 20 and 21
orf19.1189	0.153025	2.02769e-05	CAL0002133		Predicted ORF in Assemblies 19, 20 and 21;transcription regulated upon yeast-hyphal switch
orf19.4530.1	0.149361	1.21616e-05	CAF0007014		ORF Predicted by Annotation Working Group;regulated by Nrg1p, Tup1p
orf19.424	0.149282	1.05161e-05	CAL0005613	TRP99	Protein described as thioredoxinperoxidase/alkyl hydroperoxide reductase;transcriptionally regulated by iron; expression greater inlow iron; regulated by Gcn4p; induced in response to aminoacid starvation (3-aminotriazole treatment)
orf19.7296	0.147623	5.96255e-05	CAL0004024		Predicted ORF in Assemblies 19, 20 and 21;similar to stomatin mechanoreception protein; induced byRgt1p
orf19.338	0.145111	1.09646e-05	CAL0004758		Predicted ORF in Assemblies 19, 20 and 21; Hog1p-downregulated; shows colony morphology-related generegulation by Ssn6p
orf19.7396	0.144646	0.0008777	CAL0004843		Predicted ORF in Assemblies 19, 20 and 21
orf19.1586	0.143577	4.28709e-06	CAL0005644	FGR22	Putative phosphatidylinositol-specificphospholipase C (PI-PLC); predicted type 2 membraneprotein; no S. cerevisiae ortholog; role in, and regulatedby, filamentation; no mouse systemic virulence role;almost identical to orf19.5797
orf19.3335	0.143233	1.46191e-06	CAL0004121		Predicted ORF in Assemblies 19, 20 and 21; showscolony morphology-related gene regulation by Ssn6p;repressed by nitric oxide
orf19.1339	0.141758	1.17697e-05	CAL0003799	CPY1	Carboxypeptidase Y; transcriptionally regulatedat yeast-hyphal transition or macrophage response;upregulated in the presence of human neutrophils;regulated by Gcn2p and Gcn4p; putative N-glycosylation
orf19.7250	0.141622	1.46191e-06	CAL0003894		Predicted ORF in Assemblies 19, 20 and 21
orf19.2972	0.140526	9.49231e-06	CAL0006104	PDE2	Cyclic nucleotide phosphodiesterase, highaffinity; role in moderating signaling via cAMP; requiredfor wild-type virulence, hyphal growth, switching, andcell wall, but not for pseudohyphal growth; expressedshortly after hyphal induction
orf19.2172	0.139527	2.09813e-05	CAL0005411	ARA1	D-Arabinose dehydrogenase; enzyme oferythroascorbic acid biosynthesis; NADP+ cofactor; activetoward D-arabinose, L-fucose, L-xylose, L-galactose;inhibited by metal ions, thiol group-specific reagents;induced on adherence to polystyrene
orf19.7111.1	0.138787	1.27656e-06	CAL0002844		Predicted ORF in Assemblies 19, 20 and 21
orf19.6637	0.137544	1.17697e-05	CAL0004017		Predicted ORF in Assemblies 19, 20 and 21
orf19.4777	0.136951	8.57712e-06	CAL0004557	DAK2	Protein described as similar to dihydroxyacetonekinase; transcription is decreased upon yeast-hyphalswitch; fluconazole-induced; caspofungin repressed
orf19.2079	0.13629	7.50215e-06	CAL0004502	PHHB	Transposon mutation affects filamentous growth
orf19.4132	0.135654	1.2158e-06	CAL0005668		Predicted ORF in Assemblies 19, 20 and 21
orf19.6816	0.135045	0.000275584	CAL0005659		Predicted ORF in Assemblies 19, 20 and 21
orf19.1809	0.131988	0.00073208	CAL0001586		Predicted 3-hydroxyacyl-CoA epimerase; upregulated upon phagocytosis; transcription is regulated by Mig1p; expression is regulated upon white-opaque switching; merged with orf19.1288 in Assembly 20
orf19.6178	0.130518	1.07057e-06	CAL0006101	FBP1	Fructose-1,6-bisphosphatase, a key enzyme ofgluconeogenesis; involved in the carbohydrate metabolism;regulated by Efg1p, Ssn6p; upregulated upon phagocytosis,effecting switch from glycolysis to gluconeogenesis inmacrophage
orf19.7554	0.130117	5.03386e-05	CAL0000090		Putative transporter; slightly similar to theSit1p siderophore transporter; induced by nitric oxide inyhb1 mutant
orf19.7459	0.129487	1.38003e-06	CAL0005593		Predicted ORF in Assemblies 19, 20 and 21;fluconazole-induced; ketoconazole-repressed
orf19.5045	0.129246	1.46191e-06	CAL0001669		Predicted ORF in Assemblies 19, 20 and 21
orf19.3932	0.129103	1.27656e-06	CAL0002930		Predicted ORF in Assemblies 19, 20 and 21;induced in core caspofungin response; increased expressionobserved in an ssr1 homozygous null mutant; induced bynitric oxide in yhb1 mutant
orf19.675	0.129058	6.13073e-06	CAL0001097		Similar to cell wall proteins; induced in corestress response, core caspofungin response; iron-regulated; amphotericin B induced; regulated by Cyr1p,Ssn6p; possibly spurious ORF (Annotation Working Groupprediction)
orf19.2959.1	0.127789	1.63961e-05	CAF0006969		ORF Predicted by Annotation Working Group
orf19.7288	0.127044	0.000146875	CAL0004000		Predicted ORF in Assemblies 19, 20 and 21
orf19.6983	0.125369	8.52952e-06	CAL0000394		Predicted ORF in Assemblies 19, 20 and 21;repressed by nitric oxide
orf19.2737	0.124892	9.72214e-07	CAL0004219		Predicted ORF in Assemblies 19, 20 and 21
orf19.6928	0.122795	8.90619e-07	CAL0000212	SAP9	Secreted aspartyl proteinase; roles in adhesion,cell surface integrity; induced by antifungal drugs,stationary phase, or in white-phase cells; farnesol-downregulated in biofilm; autocatalytic processing; GPI-anchor; N-glycosylated
orf19.4118	0.121743	5.09599e-06	CAL0005596	CNT	Cation-coupled nucleoside transporter(H(+)/nucleoside symporter); CNT family protein;transports adenosine, uridine, inosine, guanosine; variantalleles encode high- and low-affinity isoforms; S or G atresidue 328 affects specificity
orf19.5818	0.120518	2.57311e-06	CAL0002282	SUR2	Protein described as similar to ceramidehydroxylase; predicted enzyme of sphingolipidbiosynthesis; upregulated in biofilm; regulated by Tsa1p,Tsa1Bp under H2O2 stress conditions
orf19.1172	0.120149	3.67069e-06	CAL0002095		Protein similar to phosphate transporters; regulated upon white-opaque switching or biofilm formation; Hog1p, ciclopirox olamine or alkaline induced; caspofungin or stress repressed; merged with orf19.655 in Assembly 20
orf19.4618	0.117351	2.62401e-06	CAL0003619	FBA1	Putative fructose-bisphosphate aldolase; enzymeof glycolysis; antigenic in murine or human infection;regulated on yeast-hyphal switch; induced by Efg1p, Gcn4p,Hog1p, biofilm growth, or fluconazole; phagocytosis-repressed; fungal-specific
orf19.6420	0.117333	2.73098e-06	CAL0002165	PGA13	Putative GPI-anchored protein; described assimilar to mucins; induced during cell wall regeneration,and during core caspofungin response; regulated by Tsa1p,Tsa1Bp in minimal media at 37 deg and by Cyr1p, Nrg1p,Tup1p, Rlm1p
orf19.6937	0.114361	1.62327e-06	CAL0000244	PTR2	Putative oligopeptide transporter; regulated byStp2p and Stp3p; transcriptionally induced uponphagocytosis by macrophage; downregulated by Rim101p at pH8
orf19.4679	0.114165	2.54122e-06	CAL0003797	AGP2	Protein described as an amino acid permease;hyphal downregulated; regulated upon white-opaqueswitching; induced in core caspofungin response, duringcell wall regeneration, or by flucytosine; fungal-specific(no human or murine homolog)
orf19.4318	0.113931	8.90619e-07	CAL0000926	MIG1	Transcriptional repressor; regulates genes forutilization of carbon sources; Tup1p-dependent and -independent functions; upregulated in biofilm; hyphaldownregulated; caspofungin repressed; functional homologof S. cerevisiae Mig1p
orf19.2021	0.112295	2.15986e-06	CAL0004354	HGT8	Putative glucose transporter of the majorfacilitator superfamily; the C. albicans glucosetransporter family comprises 20 members; 12 probablemembrane-spanning segments; gene has intron; expressed inrich medium with 2% glucose
orf19.1721	0.11024	3.42944e-06	CAL0000802	NCE103	Carbonic anhydrase involved in the conversion ofcarbon dioxide to bicarbonate; essential for pathogenesisin host niches with limited CO2; induced upon biofilmformation
orf19.1979	0.109735	1.26195e-05	CAL0002676	GIT1	Putative glycerophosphoinositol permease; fungal-specific (no human or murine homolog); alkalinedownregulated; transcription is specific to white celltype; caspofungin repressed; macrophage/pseudohyphal-repressed
orf19.1067	0.108704	7.50215e-06	CAL0001210	GPM2	Protein described as phosphoglycerate mutase;decreased expression in hyphae compared to yeast-formcells; macrophage/pseudohyphal-repressed; induced by highlevels of peroxide stress
orf19.1089	0.108572	7.54361e-05	CAL0001256		Predicted ORF in Assemblies 19, 20 and 21
orf19.842	0.107918	8.90619e-07	CAL0002749	ASR3	Gene regulated by cAMP and by osmotic stress;greater mRNA abundance observed in a cyr1 or ras1homozygous null mutant than in wild type; possiblyspurious ORF (Annotation Working Group prediction)
orf19.6745	0.104108	2.73098e-06	CAL0004861	TPI1	Putative ortholog of S. cerevisiae Tpi1p, whichis triose-phosphate isomerase involved in glycolysis andgluconeogenesis; antigenic in mouse or human; mutationaffects filamentous growth; biofilm-induced; macrophage-downregulated protein
orf19.3675	0.101886	8.2573e-06	CAL0000451	GAL7	Predicted ORF in Assemblies 19, 20 and 21;macrophage/pseudohyphal-repressed
orf19.6660	0.0998961	3.54878e-05	CAL0004080		Predicted ORF in Assemblies 19, 20 and 21
orf19.3442	0.0990591	2.15986e-06	CAL0004987		Predicted ORF in Assemblies 19, 20 and 21
orf19.7520	0.0984439	1.62327e-06	CAL0006419	POT1	Putative peroxisomal 3-oxoacyl CoA thiolase;transcription is regulated by Nrg1p and Mig1p; farnesolregulated
orf19.395	0.0982488	5.20993e-06	CAL0004953	ENO1	Enolase (2-phospho-D-glycerate-hydrolyase),enzyme of glycolysis and gluconeogenesis; major cell-surface antigen; binds host plasmin and plasminogen;immunoprotective; single C. albicans enolase gene; biofilm-induced; phagocytosis-repressed
orf19.7668	0.0979408	1.07057e-06	CAL0000956	MAL2	Alpha-glucosidase that hydrolyzes sucrose;required for sucrose utilization; transcriptionallyregulated by Suc1p; expression is induced by maltose,repressed by glucose; transposon mutation affectsfilamentous growth
orf19.5070	0.0969132	2.2837e-06	CAL0001751		Predicted ORF in Assemblies 19, 20 and 21;transcriptionally regulated by iron; expression greater inlow iron; similar to cell-wall mannoproteins; greater mRNAabundance observed in a cyr1 homozygous null mutant thanin wild type; regulated by osmotic and ox
orf19.1149	0.0968722	2.22419e-06	CAL0002010	MRF1	Protein similar to mitochondrial respiratoryproteins; increased transcription is observed upon benomyltreatment; induced by nitric oxide; induced in core stressresponse; oxidative stress-induced via Cap1p
orf19.1069	0.0966769	9.50294e-07	CAL0001212	RPN4	DNA binding protein with Cys2-His2 zinc-finger;putative regulator of proteasome genes; DNA recognitionsequence (GAAGGCAAAA) enriched in regions upstream ofproteasome genes; induced in core stress response
orf19.6387	0.0939251	1.12358e-06	CAL0001410	HSP104	Functional homolog of S. cerevisiae Hsp104p; haschaperone and prion propagation activity in S. cerevisiae;guanidine-insensitive; heat shock/stress induced;downregulated in biofilm upon treatment with farnesol; nohuman or murine homolog
orf19.2623	0.0930385	3.819e-05	CAL0003406		Putative transcription factor with zinc clusterDNA-binding motif
orf19.6824	0.090143	0.000117529	CAL0005695		Predicted ORF in Assemblies 19, 20 and 21;appears to be C. albicans-specific; induced upon biofilmformation; transcription is repressed in response to alphapheromone in SpiderM medium
orf19.3340	0.089144	1.45474e-06	CAL0004132	SOD2	Mitochondrial manganese-containing superoxidedismutase; role in protection against oxidative stress;active as homotetramer; N-terminal 34 amino acids removedupon import into mitochondria; H2O2-induced via Cap1p;alkaline downregulated
orf19.3612	0.0887097	1.63961e-05	CAL0000303	PST2	Putative NADH:quinone oxidoreductase; similar to1,4-benzoquinone reductase; immunogenic in mouse;increased transcription on benomyl treatment; oxidativestress-induced via Cap1p; fungal-specific (no human ormurine homolog)
orf19.3053	0.0884355	2.52033e-06	CAL0001432		Predicted ORF in Assemblies 19, 20 and 21;identified in extracts from biofilm and planktonic cells
orf19.2251	0.0878942	8.35185e-07	CAL0006286	AAH1	Protein not essential for viability; similar toS. cerevisiae Aah1p, which is an adenine deaminaseinvolved in purine salvage and nitrogen catabolism; showscolony morphology-related gene regulation by Ssn6p; Hog1p-, biofilm-induced
orf19.3740	0.0847472	2.03092e-05	CAL0001195	PGA23	Putative GPI-anchored protein of unknownfunction; transcription is negatively regulated byRim101p; regulated by Cyr1p; shows colony morphology-related gene regulation by Ssn6p
orf19.4445	0.0838509	1.16668e-05	CAL0001847		Predicted ORF in Assemblies 19, 20 and 21; Plc1p-regulated
orf19.1290	0.0821351	8.90619e-07	CAL0003100		Predicted ORF in Assemblies 19, 20 and 21
orf19.915	0.0818001	9.50294e-07	CAL0003604		Predicted ORF in Assemblies 19, 20 and 21
orf19.5626	0.0797919	8.31788e-05	CAL0000590		Predicted ORF in Assemblies 19, 20 and 21; Plc1p-regulated
orf19.1974	0.0797014	1.07057e-06	CAL0002671	TFS1	Transcription is regulated upon yeast-hyphalswitch; shows colony morphology-related gene regulation bySsn6p
orf19.3150	0.0773352	8.14482e-07	CAL0002333	GRE2	Protein described as a reductase; transcriptionis regulated by Nrg1p and Tup1p; benomyl-induced; hyphal-induced; macrophage/pseudohyphal-repressed; expressiongreater in low iron; reported to be involved in osmoticstress response
orf19.238	0.0740445	5.43244e-07	CAL0003960	CCP1	Similar to cytochrome-c peroxidase N terminus;transcription is negatively regulated by Rim101p oralkaline pH; transcription induced by interaction withmacrophage or low iron; oxygen-induced activity
orf19.5437	0.0736529	2.63175e-06	CAL0005236	RHR2	Putative glycerol 3-phosphatase; roles inosmotic tolerance, glycerol accumulation in response tosalt; regulated by macrophage, stress response, yeast-hyphal switch, pheromone, GCN4, HOG1, NRG1, TUP1;antigenic in murine systemic infection
orf19.4279	0.0731487	1.13694e-06	CAL0000325	MNN1	Putative alpha-1,3-mannosyltransferase, acomponent of mannosyltransferase complex; transcription isnegatively regulated by Rim101p; transcription is elevatedin chk1 and nik1 homozygous null mutants, but not in thesln1 null mutant
orf19.4941	0.0703463	1.52767e-06	CAL0006300	TYE7	Putative bHLH (basic region, helix-loop-helix)transcription factor; hyphally regulated via Cph1p, Cyr1p;flucytosine, Hog1p induced; amphotericin B, caspofunginrepressed; downregulated in azole-resistant strainoverexpressing MDR1
orf19.1363	0.0702442	1.66691e-06	CAL0003883		Predicted ORF in Assemblies 19, 20 and 21; Plc1p-regulated
orf19.2768	0.069707	7.25229e-06	CAL0004258	AMS1	Putative alpha-mannosidase; transcription isregulated by Nrg1p; induced during cell wall regeneration
orf19.6814	0.0696299	8.20552e-07	CAL0005657	TDH3	Glyceraldehyde-3-phosphate dehydrogenase; enzymeof glycolysis; binds fibronectin and laminin, may therebymediate host cell adherence; at surface of yeast-formcells and hyphae; soluble in hyphae; antigenic duringinfection; NAD-linked
orf19.2726	0.0695902	5.30992e-07	CAL0004202		Predicted ORF in Assemblies 19, 20 and 21; Plc1p-regulated
orf19.7166	0.0671505	8.64848e-07	CAL0003047		Predicted ORF in Assemblies 19, 20 and 21;increased transcription is observed in an azole-resistantstrain that overexpresses MDR1
orf19.5753	0.0669963	8.90619e-07	CAL0001467	HGT10	Putative glucose transporter of the majorfacilitator superfamily; the C. albicans glucosetransporter family comprises 20 members; induced byosmotic stress, at low glucose in rich media, during cellwall regeneration; 12 membrane spans
orf19.771	0.0659883	2.84091e-05	CAL0001933	LPG20	Protein of aldo-keto reductase family;nonessential; similar to aryl alcohol dehydrogenases, S.cerevisiae Ypl088wp, A. tumefaciens MocA; osmotic stress-induced, correlates with overexpression of MDR1 influconazole-resistant isolate
orf19.5417	0.0654139	8.14482e-07	CAL0005188	DOT5	Alkaline downregulated
orf19.251	0.0654087	8.90619e-07	CAL0004002		Member of ThiJ/PfpI protein family; antigenic(Cand a 3 allergen); binds human immunoglobulin E; 2 N-glycosylation motifs; alkaline, fluconazole, Hog1p-downregulated; induced in core stress response or byoxidative stress (via Cap1p); possibly benomyl induc
orf19.5158	0.0641727	8.90619e-07	CAL0002595		Protein with slight similarity to a human geneassociated with colon cancer and to orf19.5158; regulatedby Gcn4p, Cyr1p; induced in response to amino acidstarvation (3-aminotriazole treatment); macrophage-inducedprotein, macrophage-downregulated gene
orf19.5612	0.0616045	2.15337e-06	CAL0000558		Predicted ORF in Assemblies 19, 20 and 21;regulated by Tsa1p, Tsa1Bp in minimal media at 37 deg
orf19.4082	0.0610562	1.07057e-06	CAL0004933	DDR48	Immunogenic stress-associated protein; regulatedby filamentous growth pathways; induced by benomyl,caspofungin, or in azole-resistant strain; Hog1p, alkalinedownregulated; similar to S. cerevisiae Ddr48p(ATP/GTPase, role in DNA repair)
orf19.2020	0.059651	8.90619e-07	CAL0004351	HGT6	Putative glucose transporter of majorfacilitator superfamily; 20 members of C. albicans glucosetransporter family; 12 probable membrane-spanningsegments; core stress response, fluconazole-induced;expressed in rich medium with 2% glucose
orf19.6489	0.0581319	1.53349e-05	CAL0002318	FMP45	Protein induced during the mating process;alkaline downregulated; repressed in response to alphapheromone in SpiderM medium
orf19.3651	0.057634	3.03971e-06	CAL0000415	PGK1	Phosphoglycerate kinase; enzyme of glycolysis;localizes to cell wall and to cytoplasm; antigenic duringmurine or human systemic infection; biofilm, Hog1p, GCN-induced; downregulated upon phagocytosis; possible N-glycosylation at N349
orf19.6229	0.0576324	2.92126e-06	CAL0000462	CAT1	Catalase; role in resistance to oxidativestress, including neutrophils, peroxide; role in murinesystemic virulence; regulated by iron, ciclopirox olamine,fluconazole, growth, carbon source, pH, Rim101p, Ssn6p,Hog1p, core stress response
orf19.4477	0.0566878	8.90619e-07	CAL0001962	CSH1	Member of aldo-keto reductase family, similar toaryl alcohol dehydrogenases; role in adhesion tofibronectin, cell surface hydrophobicity; regulated bytemperature, growth phase, benomyl, macrophageinteraction; azole resistance associated
orf19.1153	0.0563556	2.22909e-06	CAL0002044	GAD1	Protein described as glutamate decarboxylase;macrophage-downregulated gene; alkaline downregulated;amphotericin B induced
orf19.1862	0.0558755	8.14482e-07	CAL0001729		Possible stress protein; increased transcriptionis associated with CDR1 and CDR2 overexpression orfluphenazine treatment; transcription regulated by Sfu1p,Nrg1p, Tup1p
orf19.2693	0.0555887	1.40523e-05	CAL0003548		Increased transcription is observed upon benomyltreatment transcription and in populations of cellsexposed to fluconazole over multiple generations;regulated by Nrg1p, Tup1p; induced by nitric oxide
orf19.2870	0.0536872	0.000120306	CAL0005196		Predicted ORF in Assemblies 19, 20 and 21
orf19.5902	0.053535	8.90619e-07	CAL0003232	RAS2	Protein similar to S. cerevisiae Ras2p, whichactivates adenylate cyclase and is involved inpseudohyphal growth of S. cerevisiae; transposon mutationaffects filamentous growth
orf19.3707	0.0507806	2.42968e-06	CAL0001071	YHB1	Nitric oxide dioxygenase; acts in nitric oxidescavenging/detoxification; role in virulence in mouse; notessential for viability; similar to S. cerevisiae Yhb1p;transcription activated by NO, macrophage interaction;hyphal downregulated
orf19.508	0.0501315	8.90967e-07	CAL0000052	QDR1	Putative transporter of antibiotic resistance;transcription is regulated by Nrg1p and Tup1p; caspofunginrepressed; expression is regulated upon white-opaqueswitching
orf19.1408	0.0490256	0.00010279	CAL0004466		Predicted ORF from Assembly 19; merged with orf19.6116 in Assembly 20
orf19.4543	0.0487527	2.31086e-06	CAL0002758	UGA2	Protein not essential for viability; similar toS. cerevisiae Uga2p, which is succinate semialdehydedehydrogenase with a role in glutamate catabolism;transcription regulated by Mig1p, Tup1p, Gcn4p
orf19.1048	0.0472087	2.73098e-06	CAL0001158	IFD6	Aldo-keto reductase family member; similar toaryl alcohol dehydrogenases, S. cerevisiae Ypl088wp;increased protein correlates with MDR1 overexpression (butnot CDR1 or CDR2) in fluconazole-resistant clinicalisolates; farnesol regulated
orf19.2241	0.0471398	5.89453e-06	CAL0006260	PST1	Protein described as 1,4-benzoquinone reductase;hyphal-induced expression, regulated by Cyr1p, Ras1p,Efg1p, Nrg1p, Rfg1p, Tup1p
orf19.1151	0.0449194	2.43539e-06	CAL0002039		Predicted ORF from Assembly 19; induced in core stress response; merged with orf19.1152 in Assembly 20
orf19.1407	0.044771	8.20552e-07	CAL0004464		Predicted ORF from Assembly 19; merged with orf19.6117 in Assembly 20
orf19.734	0.0437819	1.94923e-06	CAL0001803	GLK1	Putative glucokinase; transcription is regulatedupon yeast-hyphal switch; transcriptionally regulated byEfg1p; fluconazole-induced; induced in core stressresponse; shows colony morphology-related gene regulationby Ssn6p
orf19.1152	0.0412927	3.17216e-07	CAL0002042		Predicted ORF in Assemblies 19, 20 and 21;regulated by Gcn2p and Gcn4p; induced in core stressresponse
orf19.2107.1	0.0411695	1.86163e-05	CAL0005270	MUQ1	Protein described as choline phosphatecytidylyltransferase/phosphoethanolaminecytidylyltransferase; decreased expression in hyphaecompared to yeast-form cells
orf19.411	0.0407789	1.15892e-06	CAL0005571		Similar to GTPase regulators; transcriptionallyregulated by iron; expression greater in low iron;possibly spurious ORF (Annotation Working Groupprediction)
orf19.3337	0.0401709	6.28229e-06	CAL0004125		Predicted ORF in Assemblies 19, 20 and 21
orf19.13	0.0392453	5.89453e-06	CAL0000504		Putative glucokinase; regulated upon yeast-hyphal switch; regulated by Efg1p; fluconazole-induced; induced in core stress response; shows colony morphology-related gene regulation by Ssn6p; merged with orf19.734 in Assembly 20
orf19.7676	0.0389468	8.90619e-07	CAL0000985	XYL2	Protein described as similar to D-xylulosereductase; immunogenic in mouse; soluble protein inhyphae; Hog1p-induced; induced during cell wallregeneration; caspofungin or fluconazole-induced
orf19.733	0.0385704	6.8758e-07	CAL0001802		Predicted ORF in Assemblies 19, 20 and 21
orf19.14	0.0384913	8.20552e-07	CAL0000505		Predicted ORF from Assembly 19; removed from Assembly 20
orf19.4943	0.0382852	8.90619e-07	CAL0006302	PSA2	Predicted ORF in Assemblies 19, 20 and 21;macrophage-downregulated gene
orf19.2762	0.0378901	1.52767e-06	CAL0004253	AHP1	Putative alkyl hydroperoxide reductase;immunogenic in mouse; fluconazole-induced; amphotericin B,caspofungin, alkaline downregulated; induced in corestress response; regulated by Ssk1p response regulator,Nrg1p, Tup1p, Ssn6p, Hog1p
orf19.6116	0.0365439	4.99213e-06	CAL0005961	GLK4	Protein described as a glucokinase; decreasedexpression in hyphae compared to yeast-form cells
orf19.2344	0.0360344	8.90967e-07	CAL0000739	ASR1	Protein described as similar to heat shockproteins; transcription regulated by cAMP, osmotic stress,ciclopirox olamine, ketoconazole; negatively regulated byCyr1p, Ras1p; shows colony morphology-related generegulation by Ssn6p
orf19.6117	0.0359652	8.90619e-07	CAL0005962		Predicted ORF in Assemblies 19, 20 and 21
orf19.2877	0.0352141	8.82214e-07	CAL0005202	PDC11	Protein similar to pyruvate decarboxylase;antigenic; at cell surface of hyphal, but not yeast-form,cells; soluble in hyphae; regulated by Gcn4p, Efg1p,Efh1p; fluconazole-induced; repressed upon amino acidstarvation; biofilm-induced
orf19.220	0.0343753	8.3003e-07	CAL0003915	PIR1	Structural protein of cell wall; 1,3-beta-glucan-linked; O-glycosylated by Pmt1p; N-mannosylated; multipletandem repeats; heterozygous mutant has cell wall defects;hyphal repressed; Hog1p, fluconazole induced; iron, Efg1p,Plc1p regulated
orf19.2262	0.0341821	3.17216e-07	CAL0006314		Predicted ORF in Assemblies 19, 20 and 21;similar to quinone oxidoreductases; increasedtranscription is observed upon benomyl treatment; inducedby nitric oxide; oxidative stress-induced via Cap1p
orf19.2356	0.0324641	2.93127e-06	CAF0006886	CRZ2	Putative transcription factor; zinc finger;similar to S. cerevisiae Crz1p; homozygous crz1, not crz2,null mutation suppresses fluconazole resistance ofhomozygous cka2 null (defective in CK2 kinase ); Rim101p-downregulated at pH 8
orf19.670.2	0.031986	2.31086e-06	CAL0001089	SMT3	SUMO, small ubiquitin-like protein; Smt3p-conjugated proteins localize to septation site and motherside of bud neck; C. albicans septins appear not to beSmt3p-modified, in contrast to S. cerevisiae septins;similar to S. cerevisiae Smt3p
orf19.7284	0.0318781	2.47461e-07	CAL0003994	ASR2	Gene regulated by cAMP and by osmotic stress;greater mRNA abundance observed in a cyr1 or ras1homozygous null mutant than in wild type
orf19.4450.1	0.030405	5.10528e-07	CAL0001867		Predicted zinc-finger protein of unknownfunction
orf19.4886	0.0299219	4.71001e-05	CAL0005502		Predicted ORF in Assemblies 19, 20 and 21
orf19.3483	0.0285856	7.04935e-07	CAL0005088		Predicted ORF in Assemblies 19, 20 and 21; Plc1p-regulated
orf19.5686	0.0285454	2.47461e-07	CAL0000737		Predicted ORF in Assemblies 19, 20 and 21
orf19.5113	0.0283122	9.04902e-07	CAL0002509	ADH2	Putative alcohol dehydrogenase; soluble proteinin hyphae; fungal-specific (no human or murine homolog);expression is regulated upon white-opaque switching;regulated by Ssn6p
orf19.682	0.0281939	7.81076e-07	CAL0001130		Predicted ORF from Assembly 19; ketoconazole-induced; fluconazole-downregulated; induced in a cyr1 homozygous null mutant; shows colony morphology-related gene regulation by Ssn6p; merged with orf19.2296 in Assembly 20
orf19.2531	0.0274553	4.37379e-07	CAL0002434	CSP37	Plasma membrane, hyphal cell wall protein; rolein progression of murine systemic infection; predicted P-loop, divalent cation binding, N-glycosylation sites;expressed in yeast and hyphae; hyphal downregulated; lacksS. cerevisiae homolog
orf19.2659	0.02619	2.84091e-05	CAL0003479		Predicted ORF from Assembly 19; downregulation correlates with clinical development of fluconazole resistance; decreased expression in hyphae compared to yeast-form cells; Ras1p-regulated; merged with orf19.1354 in Assembly 20
orf19.2608	0.0244019	2.42623e-07	CAL0003363	ADH5	Putative alcohol dehydrogenase; soluble proteinin hyphae; expression is regulated upon white-opaqueswitching; fluconazole-induced; antigenic during murinesystemic infection; regulated by Nrg1p, Tup1p; macrophage-downregulated protein
orf19.7514	0.0235005	2.38713e-06	CAL0006389	PCK1	Phosphoenolpyruvate carboxykinase; role ingluconeogenesis; regulated by hyphal switch, carbonsource; repressed on glucose; induced by fluconazole,phagocytosis, H2O2; predicted ATP-dependent, dimeric;predicted PKC phosphorylation sites
orf19.7310	0.0233672	9.50294e-07	CAL0004535		Protein similar to S. cerevisiae Gin3p;transcription is upregulated in response to treatment withciclopirox olamine; positively regulated by Sfu1p; Hog1p,fluconazole-downregulated
orf19.7283	0.0232268	8.90619e-07	CAL0003991		Predicted ORF in Assemblies 19, 20 and 21
orf19.3499	0.0230869	2.4455e-05	CAL0005124		Predicted ORF in Assemblies 19, 20 and 21;regulated by Tsa1p, Tsa1Bp under H2O2 stress conditions
orf19.1354	0.0228992	9.50294e-07	CAL0003857		Transcriptionally regulated by iron or by yeast-hyphal switch; expression greater in high iron, decreasedupon yeast-hyphal switch; downregulation correlates withclinical development of fluconazole resistance; Ras1p-regulated
orf19.1288	0.0208604	4.37379e-07	CAL0003065	FOX2	Predicted 3-hydroxyacyl-CoA epimerase, requiredfor fatty acid beta-oxidation; upregulated uponphagocytosis; transcription is regulated by Mig1p;expression is regulated upon white-opaque switching
orf19.1868	0.0161077	5.43244e-07	CAL0001735	RNR22	Protein described as ribonucleoside diphosphatereductase; shows colony morphology-related gene regulationby Ssn6p; RNA abundance regulated by tyrosol and celldensity
orf19.6844	0.014853	9.50294e-07	CAL0005762	ICL1	Isocitrate lyase; enzyme of glyoxylate cycle;required for wild-type virulence in murine systemicinfection; no mammalian homolog; transcription inducedupon phagocytosis by macrophage; farnesol regulated;putative peroxisome target signal
orf19.2048	0.0129672	2.47461e-07	CAL0004418		Transcription is positively regulated by Sfu1p
orf19.3160	0.0128027	2.42623e-07	CAL0002358	HSP12	Heat-shock protein; induced uponosmotic/oxidative/cadmium stress, fluphenazine treatment,low iron, CDR1 and CDR2 overexpression, or ssn6 or ssk1homozygous null mutation; repressed by Hog1p orflucytosine; similar to S. cerevisiae Hsp12p
orf19.3338	0.0119436	6.04908e-07	CAL0004126		Predicted ORF in Assemblies 19, 20 and 21
orf19.4737	0.0115642	2.42623e-07	CAF0006865	TPO3	Possible role in polyamine transport; MFS-MDRfamily; transcription induced by Sfu1p, regulated uponwhite-opaque switching; decreased expression in hyphaecompared to yeast-form cells; regulated by Nrg1p; fungal-specific
orf19.4833	0.0114829	5.10528e-07	CAL0005353	MLS1	Malate synthase; enzyme of the glyoxylate cycle;no mammalian homolog; transcription is induced uponphagocytosis by macrophage; regulated upon white-opaqueswitching; biofilm-repressed; strong oxidative stressinduced
orf19.822	0.0110508	5.10528e-07	CAL0002678		Predicted ORF in Assemblies 19, 20 and 21;protein detected in some, not all, biofilm extracts;fluconazole-downregulated; greater mRNA abundance observedin a cyr1 or ras1 homozygous null mutant than in wildtype; transcription is upregulated in response tot
orf19.5288	0.0098919	4.37379e-07	CAL0003653	IFE2	Protein described as an alcohol dehydrogenase;decreased expression in hyphae compared to yeast-formcells; Efg1p-regulated; fluconazole-induced; Hog1p-induced
orf19.638	0.00952273	8.90619e-07	CAL0000982	FDH1	Putative formate dehydrogenase, oxidizes formateto produce CO2; induced during macrophage infection;fluconazole-downregulated; Mig1p regulated; downregulatedby Efg1p under yeast, not hyphal, growth conditions;predicted to be cytosolic
orf19.3548.1	0.00621383	2.42623e-07	CAL0005914		Predicted ORF in Assemblies 19, 20 and 21

## Sheet: mut 1 h
1 h
ORF	phr1	phr1 FDR	CGD ID	Gene Name	Description
orf19.3374	54.7375	5.38e-06	CAL0004191	ECE1	Protein comprising eight 34-residue repeats;hyphal-specific expression increases with extent ofelongation of the cell; regulated by Rfg1p, Nrg1p, Tup1p,Cph1p, Efg1p, Hog1p, farnesol, phagocytosis; maycontribute to biofilm formation
orf19.2060	45.3644	8.1e-07	CAL0004456	SOD5	Copper- and zinc-containing superoxidedismutase, protective role against oxidative stress;induced by neutrophil contact, hyphal growth, caspofungin,osmotic or oxidative stress; member of a gene familyincluding SOD1, SOD4, SOD5, and SOD6
orf19.3384	31.7712	8.42e-07	CAL0004205		Putative cell wall protein with C-terminal similarity to Hwp1p; alkaline upregulated; alpha factor induced; Rim101p-regulated; merged with orf19.1327 in Assembly 20
orf19.1816	31.5091	4.43e-06	CAL0001605	ALS3	Adhesin; ALS family; role in epithelialadhesion, endothelial invasiveness; allelic variation inadhesiveness; immunoprotective in mice; predicted GPI-anchor cell wall protein; macrophage, hyphal induced, pH,Nrg1p, Rfg1p, Tup1p regulated
orf19.2355	29.4846	7.7e-07	CAL0000753	ALS10	ALS family protein; ALS family includes cell-surface glycoproteins, some with adhesin function; putative GPI-anchor; filament induced; regulated by Nrg1p, Rfg1p, Tup1p; merged with orf19.1816 in Assembly 20
orf19.1327	28.5183	9.58e-07	CAL0003763	RBT1	Putative cell wall protein with similarity toHwp1p, required for virulence; predicted to be cell-wallattached and glycosylated; Tup1p repressed; serum, hyphaland alkaline induced; farnesol, alpha factor induced;Rfg1p-, Rim101p-regulated
orf19.1321	27.0434	5.89e-06	CAL0003753	HWP1	Hyphal cell wall protein; covalently crosslinkedto epithelial cells by host transglutaminase; opaque- anda-specific, alpha-factor induced; at MTLa side ofconjugation tube; assessment of virulence role complicatedby URA3 effects
orf19.5542	23.8097	0.000102	CAL0006162	SAP6	Secreted aspartyl proteinase; expressed uponhyphal growth, during oral carriage, mucosal, systemicinfections; sap4 sap5 sap6 triple mutant has defects insystemic virulence, survival in macrophage, and proteinutilization for nitrogen
orf19.4716	19.503	9.58e-07	CAL0004374	GDH3	Protein described as similar to NADP-glutamatedehydrogenase; hyphal downregulated expression;transcription is regulated by Nrg1p, Plc1p; downregulatedby Efg1p; upregulated by Rim101p at pH 8; ciclopiroxolamine induced
orf19.6028	17.9528	1.93e-06	CAL0005075	HGC1	Hypha-specific G1 cyclin-related proteininvolved in regulation of hyphal morphogenesis; Cdc28p-Hgc1p maintains Cdc11p S394 phosphorylation during hyphalgrowth; required for virulence in mouse model; regulatedby Nrg1p, Tup1p, farnesol
orf19.2431	17.157	8.42e-07	CAL0001514		Predicted ORF in Assemblies 19, 20 and 21;transcription is induced in response to alpha pheromone inSpiderM medium
orf19.2685	16.9487	6.63e-07	CAL0003532	PGA54	Putative GPI-anchored protein; hyphal induced;Hog1p-downregulated; induced in a cyr1 or efg1 homozygousnull mutant; shows colony morphology-related generegulation by Ssn6p; possibly spurious ORF (AWGprediction)
orf19.2125	16.2465	4.33e-07	CAL0005305		Predicted ORF in Assemblies 19, 20 and 21
orf19.3111	14.8817	1.5e-06	CAL0002231	PRA1	Mediates leukocyte adhesion, induces migration;binds integrin alphaMbeta2; immunogenic in mouse; athyphal cell surface, not yeast-form; produced at ambientpH; Rim101p induced; 17-beta-estradiol, ethynyl estradioldownregulated
orf19.3219	14.028	9.58e-07	CAL0003230		Predicted ORF in Assemblies 19, 20 and 21
orf19.1344	13.5688	4.28e-05	CAL0003826		Predicted ORF in Assemblies 19, 20 and 21;fluconazole-induced; possibly spurious ORF (AnnotationWorking Group prediction)
orf19.6630	13.0796	8.42e-07	CAF0007071		ORF Predicted by Annotation Working Group
orf19.2457	12.6496	1.48e-05	CAL0001562		Predicted ORF in Assemblies 19, 20 and 21
orf19.701	12.4334	9.83e-06	CAL0001699	CFL11	Predicted ORF in Assemblies 19, 20 and 21;similar to ferric reductase Fre10p; flucytosine repressed;possibly adherence-induced
orf19.6277	11.6589	8.66e-07	CAL0000572		Predicted ORF in Assemblies 19, 20 and 21
orf19.1065	11.4806	3.3e-06	CAL0001208	SSA2	Cell-surface protein of the HSP70 family;antigenic; role in sensitivity to beta-defensin peptides;localizes to surface of hyphae, but not yeast-form cells;farnesol-downregulated in biofilm; caspofungin repressed
orf19.386	10.3648	2.41e-06	CAL0004923	SAM4	Alkaline upregulated
orf19.4590	10.3339	3.15e-06	CAL0002933		Predicted ORF in Assemblies 19, 20 and 21;regulated by Nrg1p
orf19.2416.1	10.3216	1.58e-06	CAF0006950	MLC1	Protein with microtubule-dependent localizationto the Spitzenkorper, also localizes to cytokinetic ringin hyphae; cell-cycle dependent localization to bud tip(polarisome) and bud neck in yeast and pseudohyphal cells
orf19.1702	10.2013	2.09e-06	CAL0000758	ARF3	Transcription is filament induced; Tup1pregulated (see Locus History Note for Assembly 19correction)
orf19.2551	10.1214	9.28e-07	CAL0002475	MET6	5-methyltetrahydropteroyltriglutamate-homocysteine methyltransferase (cobalamin-independentmethionine synthase); antigenic during murine or humansystemic infection; heat shock, estrogen, possibly biofilm(reports differ), and GCN-induced
orf19.6459	9.57095	7.37e-05	CAL0002240	DPP3	Protein similar to S. cerevisiae pyrophosphatephosphatase Dpp1p; required for farnesol biosynthesis;downregulated in response to 17-beta-estradiol, ethynylestradiol
orf19.1510	9.51204	4.37e-06	CAL0005401		Protein not essential for viability
orf19.2706	9.29111	2.75e-05	CAL0004169	CRH11	Putative ortholog of S. cerevisiae Crh1p;predicted glycosyl hydrolase domain; similar to Csf4p, toantigenic Aspergillus fumigatus Aspf9; predicted Kex2psubstrate; putative GPI-anchor; localizes to cell wall,caspofungin-induced
orf19.1618	8.77686	1.93e-06	CAL0006344	GFA1	Glucosamine-6-phosphate synthase; enzyme ofchitin/hexosamine biosynthesis; homotetrameric; inhibitedby UDP-GlcNAc, FMDP, N-acyl peptide, kanosamine-6-P;functional homolog of S. cerevisiae Gfa1p; growth-phaseregulated; catalytic Cys
orf19.2210	8.7248	6.4e-06	CAL0006180		Predicted ORF in Assemblies 19, 20 and 21
orf19.1064	8.63681	2.93e-06	CAL0001207	ACS2	Probable acetyl-CoA synthetase, similar to knownfungal acetyl-CoA synthetases; antigenic during murinesystemic infection; antigenic in human; upregulated byEfg1p; macrophage-induced protein; soluble protein inhyphae
orf19.5384	8.34231	0.000423	CAL0004405	CHS8	Chitin synthase; nonessential; 8 or 9 membranespanning regions; mRNA present in yeast-form and hyphalcells; induced during cell wall regeneration; fungal-specific (no human or murine homolog)
orf19.3112	8.29271	4.23e-05	CAL0002233	ZRT1	Protein described as zinc transporter; hyphal-and macrophage-induced; alkaline upregulated by Rim101p;induced upon adherence to polystyrene
orf19.1350	7.98723	1.28e-05	CAL0003853		Predicted ORF in Assemblies 19, 20 and 21
orf19.5775	7.95644	0.000344	CAL0001515		Predicted ORF in Assemblies 19, 20 and 21; member of a family encoded by FGR6-related genes in the RB2 repeat sequence
orf19.3934	7.93144	0.000103	CAL0002934	CAR1	Transcription is regulated by Nrg1p, Mig1p, andTup1p; shows colony morphology-related gene regulation bySsn6p; alkaline upregulated
orf19.2777	7.89068	5.47e-06	CAL0004273		Predicted ORF from Assembly 19; removed from Assembly 20
orf19.5691	7.70727	6.29e-06	CAL0000744	CDC11	Septin; required for wild-type cell and hyphalmorphology, agar-invasive growth, full virulence andkidney tissue invasion in mouse, but not for kidneycolonization, immunogenicity; phosphorylation is hyphal-and cell-cycle-regulated
orf19.7579	7.65923	2.43e-05	CAL0000184	FGR34	Protein lacking an ortholog in S. cerevisiae;transposon mutation affects filamentous growth
orf19.242.2	7.6423	1.45e-06	CAL0003978	SAP8	Secreted aspartyl proteinase; regulated bygrowth phase, temperature, and white-opaque switch; highlyexpressed in opaque cells; expressed upon deep epidermalinvasion; greater expression during vaginal infection thanoral infection
orf19.1690	7.49024	3.15e-06	CAL0000187	TOS1	Protein described as similar to alpha agglutininanchor subunit; fluconazole-induced; transcription isinduced in response to alpha pheromone in SpiderM medium
orf19.3793	7.43442	1.25e-06	CAL0001309		Predicted ORF in Assemblies 19, 20 and 21;regulated by Nrg1p; greater mRNA abundance observed in acyr1 or ras1 homozygous null mutant than in wild type;possibly spurious ORF (Annotation Working Groupprediction)
orf19.7305	7.34569	0.000369	CAL0004508		Predicted ORF in Assemblies 19, 20 and 21;possibly spurious ORF (Annotation Working Groupprediction)
orf19.5015	7.33883	8.01e-06	CAL0001595	MYO2	Class V myosin; nonessential; required for wild-type actin cytoskeletal polarity, nuclear organization andmigration, and hyphal growth; sole class V myosin in C.albicans; conserved myosin ATPase and tail domains
orf19.2770.1	7.31115	3.29e-06	CAL0004268		Predicted ORF in Assemblies 19, 20 and 21
orf19.1120	7.16194	3.06e-06	CAL0001911	FAV2	Induced by mating factor in MTLa/MTLa opaquecells; greater mRNA abundance observed in a cyr1homozygous null mutant than in wild type; filamentinduced; regulated by Nrg1p, Rfg1p, Tup1p; possiblyspurious ORF (AWG prediction)
orf19.3794	7.14011	9.14e-07	CAL0001310	CSR1	Putative DNA-binding transcription factor; 5 C-terminal zinc-finger motifs; similar to S. cerevisiaeZap1p; transposon mutation affects filamentous growth;suppresses S. cerevisiae rok1 mutant inviability
orf19.1631	6.68628	3.15e-06	CAL0006397	ERG6	Delta(24)-sterol C-methyltransferase, convertszymosterol to fecosterol in ergosterol biosynthesis bymethylating position C-24; mutation confers nystatinresistance; fluconazole-induced; transcription increasedin azole-resistant strain
orf19.7308	6.63985	1.23e-05	CAL0004511	TUB1	Alpha-tubulin; gene has intron; complements cold-sensitivity of S. cerevisiae tub1 mutant; C. albicans hassingle alpha-tubulin gene, whereas S. cerevisiae has two(TUB1, TUB3); farnesol-upregulated in biofilm
orf19.2952	6.62999	6.91e-06	CAL0006050	EXG2	Protein similar to S. cerevisiae Exg2p, which isan exo-1,3-beta-glucosidase; predicted Kex2p substrate;induced during cell wall regeneration
orf19.5147	6.46901	1.41e-06	CAL0002579		Predicted ORF in Assemblies 19, 20 and 21
orf19.1203.1	6.43461	2.23e-06	CAL0002765	SRO77	Predicted ORF in Assemblies 19, 20 and 21;filament induced; fungal-specific (no human or murinehomolog)
orf19.3782	6.34958	3.68e-06	CAF0006996		ORF Predicted by Annotation Working Group;intron in 5'-UTR
orf19.5292	6.22877	2.23e-06	CAL0003673	AXL2	Protein not essential for viability; similar toS. cerevisiae Axl2p, which is a plasma membrane proteininvolved in determination of budding pattern; O-glycosylated by Pmt4p
orf19.6202	6.1895	8.47e-06	CAL0000427	RBT4	Similar to plant pathogenesis-related proteins;required for virulence in mouse systemic, rabbit cornealinfections; not required for filamentation; secretionsignal; TUP1/RFG1/SSN6/HOG1 repressed; serum, hyphal,pheromone, alkaline-induced
orf19.1012	6.16424	1.62e-06	CAL0001042		Predicted ORF in Assemblies 19, 20 and 21
orf19.4765	6.15831	9.83e-06	CAL0004519	PGA6	Putative GPI-anchored cell-wall protein ofunknown function; similar to S. cerevisiaeCcw12p/Ylr110cp; transcriptionally regulated by iron;expression greater in high iron; upregulated upon Als2pdepletion
orf19.1585	5.97868	3.24e-06	CAL0005643	ZRT2	Protein described as predicted zinc transporter;ciclopirox olamine, fluconazole, or alkalinedownregulated; transcriptionally induced by interactionwith macrophage; amphotericin B induced
orf19.4579	5.97635	7.99e-06	CAL0002881		Predicted ORF in Assemblies 19, 20 and 21
orf19.6217	5.84602	6.82e-05	CAL0000444	PGA63	Putative protein of unknown function
orf19.2614	5.80895	3.48e-06	CAL0003380	RSR1	RAS-related protein; GTP/GDP cycling requiredfor wild-type polar bud site selection, hyphal growthguidance; role in systemic virulence in mouse;geranylgeranylation predicted; suppresses S. cerevisiaecdc24-4 mutant heat sensitivity
orf19.2593	5.79913	3.47e-05	CAL0002565	BIO2	Protein described as biotin synthase;transcriptionally regulated by iron; expression greater inhigh iron; transcription is downregulated in response totreatment with ciclopirox olamine
orf19.6327	5.77496	1.09e-05	CAL0001291	HET1	Putative sphingomyelin transfer protein
orf19.1822	5.76993	2.54e-05	CAL0001625		Putative transcription factor with zinc clusterDNA-binding motif; similar to S. cerevisiae Ume6p, whichis a transcription factor involved in regulation ofmeiotic genes; alkaline upregulated; filament induced;regulated by Nrg1p, Tup1p
orf19.2496	5.71695	0.000281	CAL0001662		Predicted ORF in Assemblies 19, 20 and 21;fluconazole-downregulated
orf19.1996	5.65654	3.73e-06	CAL0002743	CHA1	Protein similar to serine/threoninedehydratases, catabolic; negatively regulated by Rim101p;expression greater in low iron; regulated on white-opaqueswitching; filament induced; transposon mutation affectsfilamentous growth
orf19.3216	5.6367	1.22e-05	CAL0003227		Similar to Rab GTPase activators
orf19.2754	5.61642	0.000109	CAL0004238		Predicted ORF in Assemblies 19, 20 and 21
orf19.5873	5.584	0.000769	CAL0002431	POL1	Protein described as DNA directed DNA polymerasealpha; RNA abundance regulated by tyrosol and celldensity
orf19.2761	5.5823	6.82e-05	CAL0004252		Predicted ORF in Assemblies 19, 20 and 21;induced by nitric oxide in yhb1 mutant; possibly spuriousORF (Annotation Working Group prediction)
orf19.7381	5.53635	3.2e-06	CAL0004794		Predicted zinc-finger protein of unknownfunction; not essential for viability
orf19.6843	5.5182	0.000132	CAL0005761		Predicted ORF in Assemblies 19, 20 and 21
orf19.4723	5.50902	5.44e-06	CAL0004396		Predicted ORF in Assemblies 19, 20 and 21
orf19.4600.1	5.49048	7.17e-06	CAL0003579		Predicted ORF in Assemblies 19, 20 and 21
orf19.5191	5.48813	2.53e-06	CAL0002724	FGR6-1	Protein lacking an ortholog in S. cerevisiae;transposon mutation affects filamentous growth
orf19.4255	5.41007	9.26e-06	CAL0000259	ECM331	Putative GPI-anchored protein; caspofungininduced; Plc1p-regulated; repressed by Rim101p, Hog1p;shows colony morphology-related gene regulation by Ssn6p;increased mRNA abundance in cyr1 homozygous null mutantyeast-form cells
orf19.716	5.38206	0.000769	CAL0001743		Predicted ORF in Assemblies 19, 20 and 21;regulated by Nrg1p, Tup1p; transcription is repressed inresponse to alpha pheromone in SpiderM medium
orf19.4308	5.34159	0.000597	CAL0000894	HSL1	Probable protein kinase, involved indetermination of morphology during the cell cycle of bothyeast-form cells and hyphae via regulation of Swe1p andCdc28p; required for full virulence and kidneycolonization in mouse systemic infection
orf19.288	5.33104	6.22e-06	CAL0004097		Predicted ORF in Assemblies 19, 20 and 21
orf19.5585	5.30076	5.39e-06	CAL0006261	SAP5	Secreted aspartyl proteinase; sap4 sap5 sap6triple mutant has defects in virulence and utilization ofprotein as nitrogen source; expressed in mucosal &amp;systemic infections, oral carriage; absent from lessvirulent species, C. dubliniensis
orf19.5337	5.29838	5.79e-05	CAL0004297	UBC15	Predicted ORF in Assemblies 19, 20 and 21
orf19.316	5.24514	1.72e-05	CAL0004667	SEC13	Protein described as protein transport factor;antigenic during murine systemic infection; macrophage-downregulated protein abundance
orf19.5315	5.23947	3.3e-06	CAL0004264	FGR6	Protein lacking an ortholog in S. cerevisiae; transposon mutation affects filamentous growth; removed from Assembly 20
orf19.1854	5.20254	3.61e-06	CAL0001693	HHF22	Putative histone H4; regulated by Efg1p;flucytosine, fluconazole-induced; amphotericin B,caspofungin repressed; shows colony morphology-relatedgene regulation by Ssn6p
orf19.6828.1	5.15151	5.14e-06	CAL0005705		Predicted ORF in Assemblies 19, 20 and 21
orf19.7610	5.10612	3.13e-06	CAL0000818	PTP3	Protein not essential for viability; similar toS. cerevisiae Ptp3p, which is a protein tyrosinephosphatase; hyphal induced; alkaline upregulated;regulated by Efg1p, Ras1p, cAMP pathways
orf19.6176	5.0994	6.65e-06	CAL0006099	SEC61	Essential protein; expected to act in proteintranslocation from the endoplasmic reticulum: similar toS. cerevisiae Sec61p; chimeric mutant partiallyfunctionally complements S. cerevisiae sec61 defects; 10transmembrane regions predicted
orf19.3031	5.07253	3.73e-06	CAL0001383		Predicted ORF in Assemblies 19, 20 and 21
orf19.3013	5.06511	4.27e-06	CAL0001344	CDC12	Septin; essential for viability; gene haspredicted splice sites; forms ring at sites of celldivision and also forms filaments in mature chlamydospore;filamentous growth induced; regulated by Nrg1p, Tup1p,tyrosol and cell density
orf19.3642	5.03184	6.4e-06	CAL0000399	SUN41	Putative cell wall glycosidase involved inbiofilm formation; hyphal induced; caspofungin repressed;Efg1p, Cph1p regulated; predicted signal sequence, O-glycosylation, potential Kex2p substrate; 9 5' E-boxes; 5'-UTR intron
orf19.1333	5.0289	1.37e-05	CAL0003790	SNG3	Predicted ORF in Assemblies 19, 20 and 21; showscolony morphology-related gene regulation by Ssn6p
orf19.2013	4.98946	3.15e-06	CAL0004332	KAR2	Similar to chaperones of Hsp70p family;transcriptionally regulated by iron; expression greater inhigh iron
orf19.6924	4.98865	5.32e-05	CAL0000204	HTA1	Putative histone H2A; reduced mRNA abundancedetected in homozygous fkh2 null mutant; amphotericin Brepressed; farnesol regulated; RNA abundance regulated bytyrosol and cell density
orf19.1401	4.9642	5.38e-06	CAL0004450	EAP1	Cell wall adhesin required for cell-celladhesion and biofilm formation; GPI anchored; Efg1p-regulated; suppresses polystyrene or cell adhesion,filamentation, invasive growth defects of S. cerevisiaeflo8 or flo11 mutant
orf19.95	4.89862	0.00315792	CAL0000707		Predicted ORF in Assemblies 19, 20 and 21
orf19.5595	4.89261	2.43e-05	CAL0006287		Predicted ORF in Assemblies 19, 20 and 21
orf19.3438	4.87874	3.48e-06	CAL0004972		Predicted ORF in Assemblies 19, 20 and 21
orf19.4181	4.8602	1.08e-05	CAL0005846	SPC2	Transcription is induced upon filamentousgrowth
orf19.3051	4.86001	3.73e-05	CAL0001429		Predicted ORF in Assemblies 19, 20 and 21; showscolony morphology-related gene regulation by Ssn6p
orf19.6573	4.85674	2.52e-05	CAL0003273	BEM2	Putative Rho1p GTPase activating protein (GAP);serum-induced transcription
orf19.7005	4.85167	0.000132	CAL0001890		Predicted ORF from Assembly 19; removed from Assembly 20
orf19.1390	4.84605	5.21e-05	CAL0003967	PMI1	Phosphomannose isomerase; cell wall biosynthesisenzyme; drug target; functional homolog of S. cerevisiaeand E. coli phosphomannose isomerase; Gcn4p-regulated;repressed by 3-AT; induced on adherence to polystyrene,phagocytosis
orf19.4593.1	4.84401	5.94e-05	CAL0002942	RGA2	Putative GTPase-activating protein (GAP) for Rho-type GTPase Cdc42p; involved in cell signaling pathwaysthat control cell polarity; similar to &lt;i&gt;S.cerevisiae&lt;/i&gt; Rga2p; induced upon low-level peroxidestress
orf19.7298	4.82637	4.61e-05	CAL0004026	CHS2	Chitin synthase; nonessential; required for wild-type chitin deposition in hyphae; transcription isregulated during dimorphic transition; Chs1p and Chs2p,but not Chs3p, are inhibited by the protoberberine HWY-289; fungal-specific
orf19.4666	4.82477	5.81e-05	CAL0003757		Predicted ORF in Assemblies 19, 20 and 21;hyphal-induced expression, regulated by Cyr1p, Ras1p,Efg1p; possibly spurious ORF (Annotation Working Groupprediction)
orf19.6034	4.82367	4.27e-06	CAL0005101	TUB2	Beta-tubulin; functional homolog of S.cerevisiae Tub2p; hyphal-induced; fluconazole-induced;gene has two introns; overproduction causes inviability inS. cerevisiae
orf19.7634	4.82358	0.00565586	CAL0000863	MCD1	Protein similar to &lt;i&gt;S. cerevisiae&lt;/i&gt; Mcd1p;transcription is repressed in response to alpha pheromonein SpiderM medium
orf19.6896	4.72526	1.95e-05	CAL0005923		Predicted ORF in Assemblies 19, 20 and 21
orf19.85	4.71225	3.36e-05	CAL0000682	GPX2	Similar to glutathione peroxidase; expressiongreater in high iron; alkaline upregulated by Rim101p;transcriptionally induced by alpha factor or interactionwith macrophage; regulated by Efg1p; caspofunginrepressed
orf19.914	4.70757	4.77e-06	CAL0003603		Predicted ORF from Assembly 19; removed from Assembly 20
orf19.88	4.70605	3.22e-05	CAL0000685	ILV5	Protein described as ketol-acidreductoisomerase; antigenic during human or murineinfection; regulated by Gcn4p; induced upon amino acidstarvation (3-aminotriazole); macrophage-downregulatedprotein; no human or murine homolog
orf19.3534	4.69983	0.000175	CAL0005878	RHO3	Putative Rho family GTPase; possible substrateof protein farnesyltransferase andgeranylgeranyltransferase type I; greater transcription inhyphal form than yeast form
orf19.7163	4.67948	0.00136523	CAL0003040		Predicted ORF in Assemblies 19, 20 and 21;possibly spurious ORF (Annotation Working Groupprediction)
orf19.5505	4.67456	1.95e-05	CAL0006063	HIS7	Putative imidazole glycerol phosphate synthase;enzyme of histidine biosynthesis; fungal-specific (nohuman or murine homolog); transcription is induced byhistidine starvation; regulated by Gcn2p and Gcn4p
orf19.5949	4.64184	1.87e-05	CAL0003358	FAS2	Alpha subunit of fatty-acid synthase; requiredfor virulence in mouse systemic infection and ratoropharyngeal infection models; regulated by Efg1p;fluconazole-induced; amphotericin B repressed
orf19.5760	4.63814	5.34e-05	CAL0001488	IHD1	Putative GPI-anchored protein of unknownfunction; alkaline upregulated; greater transcription inhyphal form than yeast form; regulated by Nrg1p, Rfg1p,Tup1p; regulated by Tsa1p, Tsa1Bp in minimal media at 37;not essential for viability
orf19.3856	4.62823	0.00106026	CAL0002090	CDC28	Cyclin-dependent protein kinase, interacts withregulatory subunit Cyb1p; involved in determination ofcell morphology during the cell cycle; phosphorylatedprimarily by Swe1p and phosphorylation is regulated byHsl1p; intron in 5'-UTR
orf19.6536	4.61602	0.00521393	CAL0003156		Predicted ORF in Assemblies 19, 20 and 21
orf19.6294	4.60933	0.000286	CAL0000620		Predicted ORF in Assemblies 19, 20 and 21
orf19.1234	4.56445	4.61e-06	CAL0002878	FGR6-10	Protein lacking an ortholog in S. cerevisiae;member of a family of related proteins; transposonmutation affects filamentous growth
orf19.3322	4.56268	1.35e-05	CAL0004091	DUT1	dUTP pyrophosphatase; converts dUTP to dUMP andpyrophosphate; cell-cycle regulated if expressed in S.cerevisiae; upstream MluI and SCB transcription regulatoryelements; induced by 17-beta-estradiol, ethynyl estradiol,macrophage
orf19.7425	4.56059	3.47e-05	CAL0005490		Predicted ORF in Assemblies 19, 20 and 21
orf19.5130	4.54344	4.46e-06	CAL0002547	PDI1	Protein described as protein disulfide-isomerase; antigenic in human; soluble protein in hyphae;transcription is induced upon filamentous growth
orf19.3549	4.54299	2.2e-05	CAL0005915	CDC21	Predicted ORF in Assemblies 19, 20 and 21;flucytosine induced
orf19.393	4.53577	4.46e-05	CAL0004948		Predicted ORF in Assemblies 19, 20 and 21
orf19.727	4.53113	7.41e-05	CAL0001776		Predicted ORF in Assemblies 19, 20 and 21;possibly spurious ORF (Annotation Working Groupprediction)
orf19.4993	4.52746	4.89e-06	CAL0000029	SEC18	Functional homolog of S. cerevisiae Sec18p,which acts in protein transport; conserved ATP bindingsite; not glycosylated
orf19.548	4.52056	8.89e-06	CAL0000214	CDC10	Septin, required for wild-type cell, hyphal, orchlamydospore morphology; role in virulence and kidneytissue invasion in a mouse model of systemic infection;forms ring at sites of cell division and filaments inmature chlamydospore
orf19.586	4.51272	6.68e-06	CAL0000341	ERV46	Transcription is induced upon filamentousgrowth
orf19.1761	4.50684	3.95e-06	CAL0000897		Predicted ORF in Assemblies 19, 20 and 21
orf19.1059	4.49888	1.73e-05	CAL0001194	HHF1	Putative histone H4; reduced mRNA in homozygousfkh2 null mutant; regulated by Efg1p; fluconazole induced;amphotericin B repressed; farnesol regulated; shows colonymorphology-related gene regulation by Ssn6p
orf19.3145	4.49702	5.15e-06	CAL0002317		Predicted ORF from Assembly 19; removed from Assembly 20
orf19.4109	4.49434	8.94e-06	CAL0005560	PMT4	Protein mannosyltransferase required for normalcell wall composition and full virulence in mouse systemicinfection; has roles in hyphal growth and drugsensitivity; one of 5 PMT family members; Axl2p is asubstrate
orf19.2098	4.48172	6.28e-06	CAL0004570	ARO8	Protein abundance is affected by URA3 expressionin the CAI-4 strain background; alkaline upregulated;Gcn4p-regulated
orf19.7232	4.4791	0.00107902	CAL0003835		Predicted ORF in Assemblies 19, 20 and 21
orf19.1099	4.45329	3.69e-06	CAL0001285		Predicted ORF from Assembly 19; removed from Assembly 20
orf19.979	4.43338	7.47e-06	CAL0003782	FAS1	Beta subunit of fatty-acid synthase;multifunctional enzyme; fluconazole-induced; amphotericinB, caspofungin repressed; macrophage/pseudohyphal-induced;fungal-specific (no human or murine homolog)
orf19.1051	4.39946	8.54e-05	CAL0001183	HTA2	Protein described as histone H2A; farnesolregulated
orf19.2322.3	4.39945	5.89e-06	CAF0006946		ORF Predicted by Annotation Working Group
orf19.4485	4.38209	0.000227	CAL0002001		Predicted ORF from Assembly 19; removed from Assembly 20
orf19.5514	4.35024	1.37e-05	CAL0006090		Predicted ORF in Assemblies 19, 20 and 21
orf19.1738.1	4.34358	5.41e-06	CAL0000839	UGP1	Protein similar to UTP-glucose-1-phosphaturidyltransferase; localizes to cell surface of yeast-formcells, but not hyphal cells; Hog1p-downregulated
orf19.6022	4.34054	8.84e-06	CAL0005069		Predicted ORF in Assemblies 19, 20 and 21;downregulated during core stress response
orf19.837	4.32126	0.000173	CAL0002717	GNA1	Glucosamine-6-phosphate acetyltransferase;enzyme of UDP-GlcNAc biosynthesis; required for viabilityin absence of GlcNAc supplementation; required forpersistent infection and wild-type virulence in mousesystemic infection
orf19.6812	4.30544	1.25e-05	CAL0005653	PMT2	Essential protein mannosyltransferase with rolesin hyphal growth and drug sensitivity; member of the PMTfamily which includes Pmt1p, Pmt2p, Pmt4p, Pmt5p, andPmt6p; induced during cell wall regeneration
orf19.6456	4.2967	0.0083122	CAL0002234		Predicted ORF in Assemblies 19, 20 and 21
orf19.1517	4.27594	2.43e-05	CAL0005414	ARO3	3-Deoxy-D-arabinoheptulosonate-7-phosphatesynthase; enzyme of aromatic amino acid biosynthesis; GCN-regulated; feedback-inhibited by phenylalanine whenheterologously produced in S. cerevisiae; Aro3p and Aro4pcatalyze the same reaction
orf19.4930	4.26279	2.67e-05	CAL0006274	SPC3	Essential protein; similar to S. cerevisiaeSpc3p, a component of the signal peptidase complexrequired for signal peptidase activity; predicted integralER membrane protein; complements spc3 and suppresses sec61S. cerevisiae mutants
orf19.1917	4.26128	2.3e-05	CAL0002522		Predicted ORF in Assemblies 19, 20 and 21
orf19.2061	4.25314	0.00105148	CAL0004459		Protein not essential for viability
orf19.2364	4.25219	1.17e-05	CAL0000766	MIS11	Protein described as similar to precursor ofmitochondrial C1-tetrahydrofolate synthase; putativeprotein of glycine catabolism; downregulated by Efg1p;fluconazole-induced
orf19.4247	4.25161	8.06e-06	CAL0000226		Predicted ORF in Assemblies 19, 20 and 21
orf19.4026	4.23995	3.73e-06	CAL0004729	HIS1	ATP phosphoribosyl transferase; enzyme ofhistidine biosynthesis; fungal-specific (no human, murinehomolog); upregulated in biofilm; acidupregulated/alkaline downregulated by Rim101p; regulatedby Gcn2p, Gcn4p; strain CA9 is a his1 mutant
orf19.1036	4.23429	1.01e-05	CAF0006884		Putative alpha-mannosidase
orf19.3475	4.23086	8.48e-06	CAL0005062		Described as a Gag-related protein; hyphalinduced; downregulation correlates with clinicaldevelopment of fluconazole resistance; repressed by nitricoxide, 17-beta-estradiol, ethynyl estradiol
orf19.183	4.22152	5.54e-05	CAL0003242	HIS3	Imidazoleglycerol-phosphate dehydratase, enzymeof histidine biosynthesis; functionally complements S.cerevisiae his3-1 mutation; hyphal-induced expression;regulated by Gcn2p and Gcn4p; fungal-specific (no human ormurine homolog)
orf19.1715	4.21496	0.000171	CAL0000781	IRO1	Putative transcription factor; role in ironutilization, pathogenesis; both IRO1 and adjacent URA3 aremutated in strain CAI4; suppresses S. cerevisiae aft1mutant low-iron growth defect; hyphal-induced; reportsdiffer about iron regulation
orf19.6169.2	4.17553	2.98e-05	CAL0006076		Predicted ORF in Assemblies 19, 20 and 21;induced by Rgt1p
orf19.2796	4.17393	0.000628	CAL0004305		Predicted ORF in Assemblies 19, 20 and 21
orf19.804	4.16849	1.83e-05	CAL0002609		Predicted ORF in Assemblies 19, 20 and 21
orf19.6293	4.15841	2.07e-05	CAL0000619		Predicted ORF in Assemblies 19, 20 and 21
orf19.4830	4.15584	4.27e-06	CAL0005351		Predicted ORF in Assemblies 19, 20 and 21
orf19.5779	4.13711	3.54e-05	CAL0001524	RNR1	Protein similar S. cerevisiae Rnr1p, largesubunit of ribonucleotide reductase; expression greater inlow iron; transposon mutation affects filamentous growth;farnesol upregulated in biofilm; regulated by tyrosol andcell density
orf19.2756	4.13706	6.51e-06	CAL0004240		Predicted ORF in Assemblies 19, 20 and 21
orf19.4560	4.12037	9.53e-06	CAL0002819		Predicted ORF in Assemblies 19, 20 and 21
orf19.3501	4.11894	3.7e-05	CAL0005764		Predicted ORF in Assemblies 19, 20 and 21; Hog1p-downregulated
orf19.4274	4.113	8.46e-05	CAL0000320	PUT1	Alkaline upregulated by Rim101p
orf19.1478	4.10702	5.57e-05	CAL0004694		Predicted ORF in Assemblies 19, 20 and 21
orf19.1559	4.06907	1.28e-05	CAL0005534	HOM2	Putative aspartate-semialdehyde dehydrogenase;fungal-specific (no human or murine homolog); ketoconazole-repressed
orf19.3352	4.04213	5.98e-05	CAL0004153		Predicted ORF in Assemblies 19, 20 and 21
orf19.4616	4.01889	0.000108	CAL0003616	POL30	Protein described as proliferating cell nuclearantigen (PCNA); RNA abundance regulated by tyrosol andcell density; transcriptionally induced by interactionwith macrophage; flucytosine induced
orf19.2297	4.0137	3.62e-05	CAL0006416		Predicted ORF in Assemblies 19, 20 and 21;induced by nitric oxide in yhb1 mutant
orf19.4991	3.9995	3.07e-05	CAL0000028	MPT5	Protein induced during the mating process
orf19.3994	3.9807	0.0016361	CAL0003173		Predicted ORF in Assemblies 19, 20 and 21
orf19.5073	3.9795	1.96e-05	CAL0001756	DPM1	Protein with similarity to S. cerevisiae Dpm1p,which is dolichol phosphate mannose synthase; filamentinduced; Tup1p-regulated
orf19.3911	3.96242	2.48e-05	CAL0002855	SAH1	Protein described as S-adenosyl-L-homocysteinehydrolase; predicted enzyme of sulfur amino acidmetabolism; antigenic in human; biofilm-, alkaline-,fluconazole-induced expression; Gcn4p-regulated; aminoacid starvation (3-AT) repressed
orf19.3447	3.95756	4.67e-05	CAL0004996		Predicted ORF in Assemblies 19, 20 and 21
orf19.2533.1	3.94767	6.59e-06	CAF0006956		ORF Predicted by Annotation Working Group
orf19.1055	3.90594	1.65e-05	CAL0001190	CDC3	Septin; essential for viability; functionalhomolog of S. cerevisiae Cdc3p; down-regulation associatedwith azole resistance; macrophage/pseudohyphal-repressed;gene has intron
orf19.663	3.89484	5.15e-06	CAL0001054	GIN4	Kinase involved in pseudohyphal-to-hyphalswitch; phosphorylates Cdc11p on S395 (regulatory);autophosphorylates; necessary for septin ring within germtube, but not for septin band at mother cell junction;role in cytokinesis
orf19.3823	3.89297	0.00088	CAL0001987	ZDS1	Nonessential protein; similar to S. cerevisiaeZds1p
orf19.1999	3.88524	9.81e-06	CAL0002746		Predicted ORF in Assemblies 19, 20 and 21
orf19.4382	3.87617	7.99e-06	CAL0001142		Predicted ORF in Assemblies 19, 20 and 21
orf19.2216	3.8597	0.00355087	CAL0006191		Predicted ORF in Assemblies 19, 20 and 21
orf19.1208	3.85565	5.58e-06	CAL0002772		Predicted ORF in Assemblies 19, 20 and 21
orf19.1254	3.84832	1.01e-05	CAL0002954	SEC23	Transcription is regulated upon yeast-hyphalswitch
orf19.7017	3.84332	0.000126	CAL0001936		Predicted ORF in Assemblies 19, 20 and 21
orf19.2209	3.84302	9.3e-05	CAL0006175	YVC1	Protein similar to &lt;i&gt;S. cerevisiae&lt;/i&gt; Yvc1p;transcription is repressed in response to alpha pheromonein SpiderM medium
orf19.7675	3.83155	1.59e-05	CAF0007124		ORF Predicted by Annotation Working Group
orf19.715	3.82458	1.1e-05	CAL0001742		Predicted ORF in Assemblies 19, 20 and 21
orf19.6988	3.81942	4.61e-05	CAL0000404		Predicted ORF in Assemblies 19, 20 and 21
orf19.6180	3.8056	8.86e-05	CAL0006114		Protein similar to Pichia anomala YDL054c and S.cerevisiae Ydl054cp; transmembrane regions predicted
orf19.3459	3.80458	1.28e-05	CAL0005015		Predicted ORF in Assemblies 19, 20 and 21
orf19.346	3.76834	7.54e-05	CAL0004796		Predicted ORF in Assemblies 19, 20 and 21
orf19.3099	3.76687	2.18e-05	CAL0001533	TRP4	Predicted enzyme of amino acid biosynthesis;upregulated in biofilm; regulated by Gcn2p and Gcn4p; S.cerevisiae ortholog is Gcn4p regulated
orf19.6925	3.76165	3.85e-05	CAL0000206	HTB1	Putative histone H2B; induced upon adherence topolystyrene; amphotericin B or caspofungin repressed;flucytosine or fluconazole induced; regulated by Efg1p
orf19.4506	3.74034	8.84e-06	CAL0002622	LYS22	Putative homocitrate synthase; fungal-specific(no human or murine homolog); repressed by nitric oxide
orf19.6960	3.736	0.004147	CAL0000327		Predicted ORF from Assembly 19; removed from Assembly 20
orf19.7538	3.70521	4.03e-05	CAL0000026		Predicted ORF in Assemblies 19, 20 and 21
orf19.1332	3.68072	0.000553	CAL0003788		Predicted ORF in Assemblies 19, 20 and 21
orf19.4603	3.66437	3.3e-05	CAL0003584		Predicted ORF in Assemblies 19, 20 and 21
orf19.2432	3.65063	5.25e-05	CAL0001516	HAC1	Putative transcription factor with bZIP DNA-binding motif; induced during the mating process;caspofungin induced
orf19.3983	3.64892	0.00049	CAL0003138		Predicted ORF in Assemblies 19, 20 and 21
orf19.1372	3.63778	1.87e-05	CAL0003908		Gene transcription regulated by Mig1p and Tup1p
orf19.576	3.62826	0.000104	CAL0000307	CTF8	Protein repressed during the mating process
orf19.6073	3.62336	8.74e-06	CAL0005187	HMX1	Heme oxygenase; acts in utilization of heminiron; gene transcriptionally activated by heat, low iron,or hemin; negatively regulated by Efg1p; expressiongreater in low iron; upregulated by Rim101p at pH 8
orf19.3144	3.59438	4.68e-05	CAL0002315		Predicted ORF from Assembly 19; removed from Assembly 20
orf19.3751	3.59387	1.76e-05	CAL0001213		Predicted ORF in Assemblies 19, 20 and 21
orf19.1265	3.59277	0.000263	CAL0002988		Predicted ORF in Assemblies 19, 20 and 21
orf19.3266	3.59258	9.38e-06	CAL0003367		Predicted ORF in Assemblies 19, 20 and 21
orf19.3889	3.58302	6.82e-05	CAL0002185		Predicted ORF from Assembly 19; removed from Assembly 20
orf19.4014	3.57941	0.00184949	CAL0004680		Predicted ORF in Assemblies 19, 20 and 21;described as similar to S. cerevisiae Cdc1p; induced uponadherence to polystyrene
orf19.4725	3.57078	6.62e-05	CAL0004400		Predicted ORF in Assemblies 19, 20 and 21
orf19.5639	3.56712	8.17e-05	CAL0000622	HIS4	Multifunctional enzyme that catalyzes threesteps of histidine biosynthesis, with phosphoribosyl-AMPcyclohydrolase, phosphoribosyl-ATP diphosphatase, andhistidinol dehydrogenase activities; required for wild-type adhesion to human calls
orf19.5591	3.55179	8.06e-06	CAL0006279	ADO1	Predicted ORF in Assemblies 19, 20 and 21;ketoconazole-induced
orf19.5022	3.5414	0.00019	CAL0001616		Predicted ORF in Assemblies 19, 20 and 21
orf19.3844	3.53612	2.06e-05	CAL0002064	MRP8	Protein not essential for viability; similar toS. cerevisiae Mrp8p, which is a mitochondrial ribosomalprotein; greater transcription in hyphal form than yeastform
orf19.6247	3.52447	3.42e-05	CAL0000499		Predicted ORF in Assemblies 19, 20 and 21
orf19.6864	3.5187	2.06e-05	CAL0005832		Predicted ORF in Assemblies 19, 20 and 21
orf19.290	3.51752	8.48e-06	CAL0004102	KRE5	Predicted UDP-glucose:glycoproteinglucosyltransferase; required for wild-type 1,6-beta-D-glucan biosynthesis, hyphal growth, and virulence in mouseIV infection; production in S. cerevisiae partiallycomplements defects of a kre5 mutant
orf19.1843	3.50096	3.85e-05	CAL0001676	ALG6	Putative glucosyltransferase involved in cellwall mannan biosynthesis; transcription is elevated inchk1, nik1, and sln1 homozygous null mutants; repressed bynitric oxide
orf19.3558	3.4992	1.01e-05	CAL0005932		Predicted ORF in Assemblies 19, 20 and 21
orf19.7112	3.4931	2.77e-05	CAL0002845	FRP2	Protein described as ferric reductase; alkalineupregulated by Rim101p; fluconazole-downregulated;upregulated in the presence of human neutrophils; possiblyadherence-induced
orf19.5518	3.47289	4.64e-05	CAL0006096		Predicted ORF in Assemblies 19, 20 and 21
orf19.4712	3.46487	8.11e-06	CAL0004368	FGR6-3	Protein lacking an ortholog in S. cerevisiae;member of a family of related proteins; transposonmutation affects filamentous growth
orf19.479.2	3.45437	1.12e-05	CAF0006899		ORF Predicted by Annotation Working Group
orf19.5445	3.44077	1.13e-05	CAL0005263	GLO3	Protein not essential for viability; similar toS. cerevisiae Glo3p, which is a GTPase-activating proteinfor ADP-ribosylation factors
orf19.394	3.43948	0.000324	CAL0004950		Predicted ORF in Assemblies 19, 20 and 21
orf19.4831	3.43486	4.57e-05	CAL0005352		Predicted ORF in Assemblies 19, 20 and 21
orf19.3843	3.42788	6.82e-05	CAL0002063		Predicted ORF in Assemblies 19, 20 and 21
orf19.2246	3.41922	0.010535	CAL0006270		Predicted ORF in Assemblies 19, 20 and 21
orf19.7585	3.39705	0.000117	CAL0000215	INO1	Inositol-1-phosphate synthase; enzyme ofinositol biosynthesis; antigenic in human; repressed byfarnesol (in biofilm) or caspofungin; regulated duringplanktonic growth; upstream inositol/choline regulatoryelement; glycosylation predicted
orf19.3174	3.39271	0.000118	CAL0002395	CDC24	GDP-GTP exchange factor for Cdc42p;phosphorylated; required for maintenance of hyphal growth;misexpression blocks hyphal growth and causes avirulencein a mouse model of systemic infection; antigenic duringhuman oral infection
orf19.5345	3.389	3.54e-05	CAL0004315		Predicted ORF in Assemblies 19, 20 and 21;induced by nitric oxide in yhb1 mutant
orf19.5244	3.38048	0.000344	CAL0003557	MCD4	Protein of major facilitator superfamily; hasphosphodiesterase/nucleotide pyrophosphatase domain;similar to S. cerevisiae Mcd4p, which acts in GPI anchorbiosynthesis
orf19.1490	3.3737	1.23e-05	CAL0004775	MSB2	Protein of unknown function; transcription isnegatively regulated by Rim101p
orf19.3744	3.36513	3.54e-05	CAL0001199		Predicted ORF in Assemblies 19, 20 and 21
orf19.3752	3.36439	1.05e-05	CAL0001214	RAD51	Predicted ORF in Assemblies 19, 20 and 21;flucytosine induced
orf19.1052	3.35309	7.34e-05	CAL0001185		Predicted histone H2B
orf19.1782	3.34173	1.24e-05	CAL0000962		Predicted ORF in Assemblies 19, 20 and 21
orf19.1414	3.32632	2.69e-05	CAL0004484		Predicted ORF in Assemblies 19, 20 and 21;possibly spurious ORF (Annotation Working Groupprediction)
orf19.4647	3.32388	2.53e-05	CAL0003705	HAP3	Protein described as similar to CCAAT-bindingtranscription factor that regulates respiration;expression greater in low iron; transcription is opaquespecific, alkaline upregulated, ciclopirox olamineinduced
orf19.5689	3.32369	2.06e-05	CAL0000741		Predicted ORF in Assemblies 19, 20 and 21
orf19.2937	3.32111	4.94e-05	CAL0006021	PMM1	Phosphomannomutase; enzyme of O- and N-linkedmannosylation; interconverts mannose-6-phosphate andmannose-l-phosphate; functional homolog of S. cerevisiaeSec53p; antigenic during murine systemic infection
orf19.3419	3.31518	0.0019833	CAL0004908	MAE1	Malic enzyme, mitochondrial; transcriptionregulated by Mig1p and Tup1p; shows colony morphology-related gene regulation by Ssn6p
orf19.2864	3.30403	1.71e-05	CAF0006966	RPL28	Putative ribosomal protein; Plc1p-regulated;genes encoding cytoplasmic ribosomal subunits, translationfactors, and tRNA synthetases are downregulated uponphagocytosis by murine macrophage
orf19.1986	3.29777	4.32e-05	CAL0002708	ARO2	Putative chorismate synthase; fungal-specific(no human or murine homolog)
orf19.4732	3.29341	1.3e-05	CAL0004422	SEC24	Possible role in ER to Golgi transport; inducedupon yeast-hyphal switch
orf19.4136	3.29236	0.000151	CAL0005675	YBL053	Predicted ORF in Assemblies 19, 20 and 21; notessential for viability
orf19.1665	3.28582	1.29e-05	CAL0000071	MNT1	Alpha-1,2-mannosyl transferase; adds secondmannose during cell-wall mannoprotein biosynthesis;required for wild-type virulence and adherence toepithelial cells; predicted type II membrane protein ofGolgi; fungal-specific
orf19.3765	3.27577	1.48e-05	CAL0001245	RAX2	Protein of unknown function; detected at yeast-form cell plasma membrane by mass spectrometry;transcription is filament induced and negatively regulatedby Rim101p, Tup1p
orf19.3409	3.26904	4.17e-05	CAL0004877	SEC12	Protein described as a guanyl-nucleotideexchange factor; transcriptionally regulated by iron;expression greater in high iron
orf19.1340	3.26607	0.00563091	CAL0003819		Predicted ORF in Assemblies 19, 20 and 21
orf19.5243	3.26507	3.45e-05	CAL0003556	TRP3	Predicted ORF in Assemblies 19, 20 and 21;regulated by Gcn2p and Gcn4p
orf19.1693	3.25958	1.16e-05	CAL0000189	CAS4	Protein similar to S. cerevisiae Tao3p;essential for viability; insertion mutation near 3' end ofgene causes increase in caspofungin sensitivity;transcription is induced in response to alpha pheromone inSpiderM medium
orf19.3490	3.24832	5.97e-05	CAL0005112	FGR6-4	Protein lacking an ortholog in S. cerevisiae;transposon mutation affects filamentous growth
orf19.6605	3.24598	0.00747704	CAL0003926		Predicted ORF in Assemblies 19, 20 and 21
orf19.252	3.23833	2.24e-05	CAL0004004		Predicted ORF in Assemblies 19, 20 and 21
orf19.4177	3.23556	0.000146	CAL0005821	HIS5	Predicted ORF in Assemblies 19, 20 and 21; Gcn4p-regulated
orf19.2886	3.22437	1.69e-05	CAL0005224	CEK1	ERK-family protein kinase, required for wild-type yeast-hyphal switching, mating efficiency, andvirulence in a mouse model; Cst20p-Hst7p-Cek1p-Cph1p MAPKpathway regulates mating, and invasive hyphal growth undersome conditions
orf19.1405	3.22401	3.72e-05	CAL0004458	PHO13	Transcription is regulated upon yeast-hyphalswitch
orf19.7578	3.22396	1.05e-05	CAL0000182		Predicted ORF in Assemblies 19, 20 and 21
orf19.2382	3.21678	0.0101785	CAL0000808		Predicted ORF in Assemblies 19, 20 and 21;similar to isoleucyl-tRNA synthetase; isoleucyl-tRNAsynthetase is the target of drugs including the cyclicbeta-amino acid icofungipen/PLD-118/BAY-10-8888 andmupirocin
orf19.4236	3.20599	1.04e-05	CAL0000185	RET2	Protein that interacts with Crk1p in the two-hybrid system; potential ortholog of S. cerevisiae Ret2p
orf19.3259	3.19357	0.000148	CAL0003345		Predicted ORF in Assemblies 19, 20 and 21
orf19.1630	3.18983	8.02e-05	CAL0006396		Predicted ORF in Assemblies 19, 20 and 21
orf19.7409	3.1861	1.32e-05	CAF0007122		ORF Predicted by Annotation Working Group
orf19.4180	3.18184	0.000384	CAL0005843		Protein described as component of ER protein-translocation complex; regulated by Gcn4p; repressed inresponse to amino acid starvation (3-aminotriazoletreatment)
orf19.1815	3.18171	2.3e-05	CAL0001603		Predicted ORF in Assemblies 19, 20 and 21
orf19.7328	3.17193	2.06e-05	CAL0004580		Gene transcription regulated by Mig1p and Tup1p
orf19.3715	3.17172	0.00054	CAL0001104	ASF1	Protein likely to be essential for growth, basedon an insertional mutagenesis strategy; similar to S.cerevisiae Asf1p, which is a chromatin assembly complexcomponent
orf19.2844	3.17039	6.86e-05	CAL0005138		Predicted ORF in Assemblies 19, 20 and 21;induced in core caspofungin response
orf19.1992	3.16919	0.0113896	CAL0002739	SIR2	Regulator of phenotypic switching in strain3153A; mutation does not affect white-opaque switchingrate in strain WO-1; similar to S. cerevisiae Sir2p;partially functionally complements S. cerevisiae sir2mutant mating defect
orf19.3394	3.16015	1.85e-05	CAL0004222		Predicted ORF in Assemblies 19, 20 and 21;transcription is induced in response to alpha pheromone inSpiderM medium
orf19.7304	3.15923	2.59e-05	CAL0004507		Predicted ORF in Assemblies 19, 20 and 21
orf19.6632	3.15823	1.48e-05	CAL0004005	ACO2	Protein described as aconitate hydratase 2;regulated by Gcn4p; repressed in response to amino acidstarvation (3-aminotriazole treatment); transcriptionallyregulated by iron; expression greater in high iron
orf19.2283	3.14836	5.64e-05	CAL0006377	DQD1	Predicted ORF in Assemblies 19, 20 and 21;ketoconazole-repressed; macrophage-downregulated proteinabundance
orf19.6756	3.14416	0.000186	CAL0004894		Predicted ORF in Assemblies 19, 20 and 21
orf19.4945	3.14239	0.000123	CAL0006305	MSH6	Protein similar to S. cerevisiae Msh6p, which isinvolved in mismatch repair; repressed under Cdc5pdepletion
orf19.3462	3.12826	0.000123	CAL0005033	SAR1	Functional homolog of S. cerevisiae Sar1p, whichis required for ER-to-Golgi protein transport; binds GTP;similar to small GTPase superfamily proteins; gene hasintron
orf19.7128	3.12197	1.63e-05	CAL0002894	SYS1	Predicted ORF in Assemblies 19, 20 and 21;transcription is regulated by Mig1p
orf19.2298	3.11655	6.63e-05	CAL0006417		Predicted ORF in Assemblies 19, 20 and 21
orf19.491	3.11565	1.67e-05	CAL0005862		Predicted ORF in Assemblies 19, 20 and 21
orf19.7111	3.11141	0.000177	CAF0007264	SOD3	Cytosolic manganese-containing superoxidedismutase, involved in protection against oxidativestress; transcription downregulated by treatment withciclopirox olamine, induced during stationary phase whenSOD1 expression is repressed
orf19.1224	3.10967	0.00471482	CAL0002835	FRP3	Upregulated in the presence of humanneutrophils; fluconazole-downregulated; repressed bynitric oxide
orf19.6308	3.10502	6.59e-05	CAL0001238		Predicted ORF in Assemblies 19, 20 and 21
orf19.2029	3.10204	2.81e-05	CAL0004366		Predicted ORF in Assemblies 19, 20 and 21
orf19.4755	3.09587	1.37e-05	CAL0004481	KEX2	Subtilisin-like protease (proproteinconvertase), processes aspartyl proteinase Sap2p; requiredfor hyphal growth and wild-type virulence in mousesystemic infection; functional homolog of S. cerevisiaeKex2p, which processes alpha-factor
orf19.6170	3.08909	3.22e-05	CAL0006089		Predicted ORF in Assemblies 19, 20 and 21
orf19.1848.1	3.08101	5.55e-05	CAF0006930		ORF Predicted by Annotation Working Group
orf19.6190	3.07302	2.43e-05	CAL0006140	SRB1	Essential GDP-mannose pyrophosphorylase;synthesizes GDP-mannose for protein glycosylation;functional homolog of S. cerevisiae Psa1p; at surface ofyeast-form, not hyphal, cells; alkaline upregulated;induced on adherence to polystyrene
orf19.5102	3.07081	0.000787	CAL0002487	PLB5	Putative phospholipase B, fungal-specific (nohuman or murine homolog); null mutation eliminates cell-associated phospholipase A2 activity and attenuatesvirulence; putative GPI anchor
orf19.4513	3.06273	2.1e-05	CAL0002652		Protein not essential for viability; possiblyspurious ORF (Annotation Working Group prediction)
orf19.3430	3.05264	2.7e-05	CAL0004951		Predicted ORF in Assemblies 19, 20 and 21;possibly spurious ORF (Annotation Working Groupprediction)
orf19.3737	3.04914	2.38e-05	CAL0001179		Predicted ORF in Assemblies 19, 20 and 21;transcription is downregulated in response to treatmentwith ciclopirox olamine
orf19.2301	3.04736	0.00216414	CAL0000640		Predicted ORF in Assemblies 19, 20 and 21
orf19.1063	3.03953	0.00121316	CAL0001206		Predicted ORF in Assemblies 19, 20 and 21
orf19.7522	3.03761	0.000424	CAL0000002		Predicted ORF in Assemblies 19, 20 and 21
orf19.6668	3.03743	2e-05	CAL0004096		Predicted ORF in Assemblies 19, 20 and 21
orf19.3680	3.03297	3.62e-05	CAL0000463	2008-09-07	Septin, required for wild-type invasive growthin vitro but not required for virulence in a mouse modelof systemic infection; localizes to hyphal septum or budneck; Asn-rich; aberrant gel mobility
orf19.2267	3.03287	5.83e-05	CAL0006323	RFA2	Protein described as DNA replication factor A;RNA abundance regulated by tyrosol and cell density
orf19.2739	3.02766	9.3e-05	CAL0004223		Predicted ORF in Assemblies 19, 20 and 21
orf19.1825	3.02418	0.000585	CAL0001629		Protein not essential for viability; filamentinduced; regulated by Nrg1p, Rfg1p, Tup1p
orf19.5281	3.01067	1.61e-05	CAL0003641		Predicted ORF in Assemblies 19, 20 and 21
orf19.3569	3.00833	0.0238082	CAL0005955		Predicted ORF in Assemblies 19, 20 and 21;constitutive expression independent of MTL or white-opaquestatus
orf19.7466	2.99391	9.05e-05	CAL0005630	ACC1	Protein with similarity to acetyl-coenzyme-Acarboxylases; regulated by Efg1p; amphotericin Brepressed; caspofungin repressed; intron in 5'-UTR
orf19.6414.3	2.9934	5.32e-05	CAL0002136		Predicted ORF in Assemblies 19, 20 and 21;possibly spurious ORF (Annotation Working Groupprediction)
orf19.3083	2.99191	4.46e-05	CAL0001501		Predicted ORF in Assemblies 19, 20 and 21
orf19.4937	2.98583	1.28e-05	CAL0006283	CHS3	Major chitin synthase of yeast-form and hyphalcells; Chs4p-activated; required for wild-type wall chitincontent; transcription induced at yeast-hyphal transition;Chs1p and Chs2p, but not Chs3p, are inhibited by theprotoberberine HWY-289
orf19.6702	2.98535	1.68e-05	CAL0004700	DED81	Putative tRNA-Asn synthetase; genes encodingribosomal subunits, translation factors, and tRNAsynthetases are downregulated upon phagocytosis by murinemacrophage
orf19.3955	2.98248	2.48e-05	CAL0003012	MES1	Cytoplasmic methionyl-tRNA synthetase (MetRS);has zinc-binding motif; genes encoding ribosomal subunits,translation factors, and tRNA synthetases aredownregulated upon phagocytosis by murine macrophage
orf19.2166	2.97466	0.000194	CAL0005394		Predicted ORF in Assemblies 19, 20 and 21
orf19.3581	2.97041	2.73e-05	CAL0005992		Predicted ORF in Assemblies 19, 20 and 21
orf19.4890	2.9645	0.000316	CAL0005519	CLA4	S/T kinase of Ste20p family; required for wild-type filamentous growth and for wild-type organcolonization and virulence in mouse systemic infection;role in chlamydospore formation; functional homolog of S.cerevisiae Cla4p
orf19.5013	2.9583	3.08e-05	CAL0001593	AGM1	Phosphoacetylglucosamine mutase (N-acetylglucosamine-phosphate mutase); enzyme of UDP-N-acetylglucosamine (UDP-GlcNAc) biosynthesis
orf19.4171	2.95336	0.000172	CAL0005809		Predicted ORF in Assemblies 19, 20 and 21
orf19.2560	2.94649	5.3e-05	CAL0002497	CDC60	Cytosolic leucyl tRNA synthetase; has conservedamino acid and ATP binding class I signature, tRNAbinding, and proofreading motifs; likely essential forgrowth, based on insertional mutagenesis strategy; similarto S. cerevisiae Cdc60p
orf19.4447	2.93556	4.59e-05	CAL0001851	YMC1	Predicted ORF in Assemblies 19, 20 and 21;flucytosine induced
orf19.2626	2.93398	2.41e-05	CAL0003412	RGD2	Putative GTPase activating protein; fungal-specific (no human or murine homolog); merged with orf19.729.1 in Assembly 20
orf19.4897	2.9336	0.000238	CAL0005528		Predicted ORF in Assemblies 19, 20 and 21
orf19.2948	2.9328	0.000361	CAL0006041	SNO1	Protein of unknown function expressed duringstationary phase; transcription is regulated by Tup1p,Efg1p
orf19.797	2.93146	3.16e-05	CAL0002029	BAT21	Protein described as a branched chain amino acidaminotransferase; regulated by Gcn4p, Gcn2p; induced inresponse to amino acid starvation (3-aminotriazoletreatment)
orf19.7098	2.92604	0.000181	CAL0002200		Predicted ORF in Assemblies 19, 20 and 21;repressed by nitric oxide
orf19.3683	2.91476	3.53e-05	CAL0000466		Putative transcription factor with zinc fingerDNA-binding motif
orf19.2939	2.91408	0.000153	CAL0006025		Predicted ORF in Assemblies 19, 20 and 21
orf19.6184	2.90913	0.000216	CAL0006121		Predicted ORF in Assemblies 19, 20 and 21;possibly spurious ORF (Annotation Working Groupprediction)
orf19.1317	2.89963	5.32e-05	CAL0003732	OSH3	Protein required for wild-type filamentation;has oxysterol binding protein domain and pleckstrinhomology motif; overproducton suppresses cph1 homozygousnull filamnetation defect; similar to S. cerevisiae Osh3p
orf19.2204.2	2.88976	3.72e-05	CAL0006171		Predicted ORF in Assemblies 19, 20 and 21
orf19.5941	2.88254	2.7e-05	CAL0003347		Predicted ORF in Assemblies 19, 20 and 21
orf19.5338	2.8769	0.000113	CAL0004298	GAL4	Putative transcription factor with zinc clusterDNA-binding motif; ortholog of S. cerevisiae Gal4p, but isnot involved in the regulation of galactose utilizationgenes; caspofungin repressed
orf19.867	2.87564	0.000153	CAL0002821		Predicted ORF in Assemblies 19, 20 and 21
orf19.1813	2.87212	2.59e-05	CAL0001600	FLC2	Protein involved in heme uptake; putative FADtransporter, similar to S. cerevisiae Flc2p
orf19.861	2.86373	3.14e-05	CAL0002806		Predicted ORF in Assemblies 19, 20 and 21
orf19.3267	2.86019	0.00309749	CAL0003368		Predicted ORF in Assemblies 19, 20 and 21
orf19.1857	2.8581	0.00697535	CAL0001696		Protein not essential for viability
orf19.2007	2.85497	4.86e-05	CAL0004322		Predicted ORF in Assemblies 19, 20 and 21
orf19.3060	2.85376	1.77e-05	CAL0001449		Predicted ORF in Assemblies 19, 20 and 21
orf19.6026	2.85248	2.62e-05	CAL0005073	ERG2	C-8 sterol isomerase; enzyme of ergosterolbiosynthesis pathway; converts fecosterol to episterol;mutant is hypersensitive to multiple drugs; ketoconazole-induced
orf19.7046	2.85117	3.07e-05	CAL0002057	MET28	Protein induced during the mating process
orf19.1396	2.84372	0.0111243	CAL0003973		Predicted ORF in Assemblies 19, 20 and 21
orf19.7353	2.83346	0.000595	CAL0004669		Predicted ORF in Assemblies 19, 20 and 21
orf19.4959	2.83327	0.00276106	CAL0006339		Predicted ORF in Assemblies 19, 20 and 21
orf19.5181	2.83004	0.000373	CAL0002691	NIK1	Histidine kinase involved in a two-componentsignaling pathway that regulates cell wall biosynthesis;required for wild-type virulence in mouse systemicinfection but not for wild-type growth or drugsensitivity/resistance
orf19.7446	2.82905	1.87e-05	CAL0005552	OPI3	Putative phosphatidylethanolamine N-methyltransferase of phosphatidylcholine biosynthesis;downregulation correlates with clinical development offluconazole resistance; amphotericin B repressed;caspofungin repressed
orf19.3769	2.82215	0.000122	CAL0001249		Predicted ORF in Assemblies 19, 20 and 21
orf19.5654	2.81877	3.85e-05	CAL0000665		Predicted ORF in Assemblies 19, 20 and 21
orf19.7321	2.81821	0.000408	CAL0004573		Predicted ORF in Assemblies 19, 20 and 21
orf19.676	2.81715	5.79e-05	CAL0001099		Predicted ORF in Assemblies 19, 20 and 21
orf19.2947	2.80864	1.91e-05	CAL0006040	SNZ1	Similar to stationary-phase-related proteins;soluble in hyphae; induced on yeast to hyphal switch, inresponse to 3-aminotriazole, or in azole-resistant strainoverexpressing MDR1; regulated by Gcn4p, macrophage; nohuman, murine homolog
orf19.4606	2.80756	7.62e-05	CAL0003589	ERG8	Putative phosphomevalonate kinase; enzyme of themevalonate pathway of isoprenoid biosynthesis;transcription is regulated by Nrg1p; possible drug target,not conserved in H. sapiens
orf19.2546	2.80145	3.62e-05	CAL0002466	TRP2	Predicted ORF in Assemblies 19, 20 and 21;regulated by Gcn2p and Gcn4p
orf19.4421	2.79982	0.00492245	CAL0001778		Processing alpha glucosidase I, involved in N-linked protein glycosylation and assembly of cell wall beta 1,6 glucan; merged with orf19.4719 in Assembly 20
orf19.6803	2.79772	0.00159594	CAL0005612	HUT1	Predicted ORF in Assemblies 19, 20 and 21
orf19.6264.3	2.78326	2.62e-05	CAL0000538		Predicted ORF in Assemblies 19, 20 and 21;possibly spurious ORF (Annotation Working Groupprediction)
orf19.5839	2.78258	6.14e-05	CAL0002337	PDR17	Predicted ORF in Assemblies 19, 20 and 21;fungal-specific (no human or murine homolog)
orf19.3329	2.78165	0.00205441	CAL0004101		Predicted ORF in Assemblies 19, 20 and 21
orf19.6169	2.77816	0.000726	CAL0006076		Predicted ORF in Assemblies 19, 20 and 21; induced by Rgt1p
orf19.390	2.77807	2.8e-05	CAL0004942	CDC42	Rho-type GTPase; required for budding andmaintenance of hyphal growth; GGTase I geranylgeranylated;misexpression blocks hyphal growth, causes avirulence inmouse IV infection; shows actin-dependent localization tohyphal tip
orf19.2257	2.77512	5.41e-05	CAL0006296		Predicted ORF in Assemblies 19, 20 and 21
orf19.4645	2.7751	3.96e-05	CAL0003701	BEM1	Protein required for wild-type budding, hyphalgrowth, and virulence in a mouse systemic infection;suppresses pseudohyphal and filamentous growth defects ofvarious S. cerevisiae mutants and heat sensitivity of S.cerevisiae cdc24-4 mutant
orf19.876	2.77476	6.82e-05	CAL0002859	PGA33	Putative GPI-anchored protein of unknownfunction; possibly spurious ORF (Annotation Working Groupprediction)
orf19.7089	2.77441	9.09e-05	CAL0002178	PMR1	Putative secretory pathway P-type Ca2+/Mn2+-ATPase, required for protein glycosylation and cell wallmaintenance; putative ortholog of S. cerevisiae PMR1
orf19.1801	2.77349	5.56e-05	CAL0001574		Predicted ORF in Assemblies 19, 20 and 21
orf19.5322	2.76599	2.64e-05	CAL0004278		Predicted ORF in Assemblies 19, 20 and 21
orf19.7327	2.7583	0.000135	CAL0004579	PHO88	Putative role in phosphate transport; biofilm-regulated expression; amphotericin B repressed
orf19.1560	2.75774	0.00103117	CAL0005561	POB3	Protein similar to S. cerevisiae Pob3p, which isinvolved in chromatin assembly and disassembly; transposonmutation affects filamentous growth
orf19.6778	2.75583	3.09e-05	CAL0004962		Predicted ORF in Assemblies 19, 20 and 21
orf19.1654	2.75392	4.54e-05	CAL0000038		Predicted ORF in Assemblies 19, 20 and 21
orf19.3673	2.75007	2.45e-05	CAL0000449		Predicted ORF in Assemblies 19, 20 and 21
orf19.1653	2.74778	4.73e-05	CAL0000036		Predicted ORF in Assemblies 19, 20 and 21;possibly spurious ORF (Annotation Working Groupprediction)
orf19.6551	2.74471	5.2e-05	CAF0007083	STE18	ORF Predicted by Annotation Working Group;similar to S. cerevisiae Ste18p; expressed in opaque orwhite MTLa/MTLa or MTLalpha/MTLalpha, but notMTLa/MTLalpha cells; MTLa1p, MTLalpha2p bind promoterregion
orf19.2093	2.74207	3.23e-05	CAL0004564	RFA1	Protein described as DNA replication factor A;RNA abundance regulated by tyrosol and cell density
orf19.649	2.73622	2.62e-05	CAL0001014		Predicted ORF in Assemblies 19, 20 and 21
orf19.1991	2.73609	3.28e-05	CAL0002738		Predicted ORF in Assemblies 19, 20 and 21
orf19.1760	2.73111	3.46e-05	CAL0000896	RAS1	RAS signal transduction GTPase; regulates cAMPand MAP kinase pathways; role in hyphal induction,virulence, apoptosis, heat-shock sensitivity;nonessential; glutamine-rich C terminus; complementsviability of S. cerevisiae ras1 ras2 mutant
orf19.5968	2.72716	2.43e-05	CAL0003409	RDI1	Protein similar to S. cerevisiae Rdi1p, which isan inhibitor of Rho-GDP dissociation; transposon mutationaffects filamentous growth; filament induced; regulated byNrg1p, Tup1p
orf19.7109	2.71452	2.98e-05	CAL0002813		Predicted ORF in Assemblies 19, 20 and 21
orf19.4719	2.7109	0.00848889	CAL0004381		Processing alpha glucosidase I, involved in N-linked protein glycosylation and assembly of cell wallbeta 1,6 glucan
orf19.6645	2.70727	0.000273	CAL0004040	HMO1	High mobility group-like protein; activatespseudohyphal growth when expressed in S. cerevisiae;decreased expression in hyphae compared to yeast-formcells; amphotericin B repressed
orf19.6237	2.70605	4.61e-05	CAL0000480	RAC1	G-protein of RAC subfamily; required forembedded filamentous growth, but not for serum-inducedhyphal growth; dynamic localization at plasma membrane;similar to, but not interchangeable with, Cdc42p; lacks S.cerevisiae homolog
orf19.1049	2.7033	0.00035	CAL0001159		Predicted ORF in Assemblies 19, 20 and 21;expression upregulated during planktonic growth
orf19.757	2.69302	6.13e-05	CAL0001868		Predicted ORF in Assemblies 19, 20 and 21
orf19.5563	2.69292	0.000992	CAL0006204	RNH1	Protein described as Ribonuclease H (RNAse H);hyphal-induced; flucytosine induced; similar to orf19.5564(see Locus History)
orf19.7229	2.69282	0.00153301	CAL0003810		Predicted ORF in Assemblies 19, 20 and 21
orf19.5711	2.68817	3.06e-05	CAL0001373		Predicted ORF in Assemblies 19, 20 and 21
orf19.4922	2.68609	0.000304	CAL0006252		Predicted ORF in Assemblies 19, 20 and 21
orf19.5768	2.68468	0.000352	CAL0001497	SNF4	Protein similar to S. cerevisiae Snf4ptranscriptional regulator; caspofungin repressed;transposon mutation affects filamentous growth
orf19.2426	2.68296	0.000139	CAL0001500		Predicted ORF in Assemblies 19, 20 and 21
orf19.5648	2.68163	2.99e-05	CAL0000647		Predicted ORF in Assemblies 19, 20 and 21
orf19.7670	2.66842	0.000993	CAL0000974		Putative Ca2+/H+ antiporter; fungal-specific (nohuman or murine homolog)
orf19.5830	2.65975	2.75e-05	CAL0002323		Protein similar to S. cerevisiae Hsp70p;predicted Kex2p substrate
orf19.5917.3	2.65907	6.82e-05	CAL0003274	STP3	Transcription factor; regulates SAP2, OPT1expression and thereby protein catabolism for nitrogensource; activated via amino-acid-induced proteolyticprocessing; macrophage/pseudohyphal-repressed
orf19.1680	2.65611	8.02e-05	CAL0000146		Predicted ORF in Assemblies 19, 20 and 21
orf19.4349	2.6559	0.000448	CAL0001022		Protein of unknown function, transcription is repressed in the presence of elevated CO2; predicted ORF in Assemblies 19, 20 and 21
orf19.300	2.65452	2.27e-05	CAL0004623	AIP2	Protein described as an actin interactingprotein; regulated by Gcn4p; induced in response to aminoacid starvation (3-aminotriazole treatment)
orf19.2755	2.64073	4.54e-05	CAL0004239		Predicted ORF in Assemblies 19, 20 and 21
orf19.1061	2.63353	0.000151	CAL0001203	HHT21	Putative histone H3; amphotericin B repressed;regulated by Efg1p; farnesol regulated
orf19.2615	2.62535	3.11e-05	CAL0003383	MDL1	Putative mitochondrial, half-size MDR-subfamilyABC transporter
orf19.2799	2.62525	0.000216	CAL0004308	GPI8	Protein likely to be essential for growth, basedon an insertional mutagenesis strategy; similar to S.cerevisiae Gpi8p, which is a subunit of the GPItransamidase complex that adds GPI anchors to proteins
orf19.7645	2.62512	0.00371917	CAL0000887		Predicted ORF in Assemblies 19, 20 and 21
orf19.6737	2.62229	0.000181	CAL0004836		Protein not essential for viability; greatermRNA abundance observed in a cyr1, ras1, or efg1homozygous null mutant than in wild type; possiblyspurious ORF (Annotation Working Group prediction)
orf19.4594	2.61921	2.41e-05	CAL0002945		Predicted ORF in Assemblies 19, 20 and 21
orf19.6779	2.61512	6.7e-05	CAL0004966	PRO2	Predicted ORF in Assemblies 19, 20 and 21;regulated by Gcn2p and Gcn4p
orf19.4341	2.60917	0.000324	CAL0001012		Predicted ORF in Assemblies 19, 20 and 21
orf19.3895	2.60535	0.000748	CAL0002204	CHT2	Chitinase; putative N-terminal catalytic domain,GPI anchor, O-mannosylated region, signal peptide; 3 N-glycosylation motifs; downregulated in core caspofunginresponse; induced in yeast-form cells; Cyr1p-, Efg1p-, pH-regulated
orf19.815	2.60505	0.000107	CAL0002646		Predicted ORF in Assemblies 19, 20 and 21;similar to S. cerevisiae Ylr422wp; transposon mutationaffects filamentous growth; regulated by Nrg1p
orf19.730	2.60427	3.12e-05	CAF0007423	ORF	Predicted ORF in Assembly 20 and 21 (see LocusHistory)
orf19.2895	2.60074	9.39e-05	CAL0005252	VMA8	Protein similar to the S. cerevisiae Vma8psubunit of vacuolar H+-ATPase; transcription is regulatedby Nrg1p and Mig1p; transcription is increased inpopulations of cells exposed to fluconazole over multiplegenerations
orf19.1832	2.59722	0.000144	CAL0001652	FCY23	Putative transporter; Gcn4p-regulated; moresimilar to S. cerevisiae Tpn1p, which is a vitamin B6transporter, than to purine-cytosine permeases
orf19.2239	2.58589	0.000187	CAL0006249		Predicted ORF from Assembly 19; merged with orf19.2238 in Assembly 20
orf19.3899	2.58264	4.79e-05	CAL0002207		Predicted ORF in Assemblies 19, 20 and 21
orf19.3516	2.5777	0.000528	CAL0005812		Predicted ORF in Assemblies 19, 20 and 21
orf19.5962	2.57591	0.00055	CAL0003398	SNF3	Glucose sensor; fermentation, filamentation,virulence roles; in 20-member C. albicans glucosetransporter family, extended C terminus; high-glucoserepressed; induced in macrophage, repressed in biofilm;predicted at plasma membrane
orf19.7271	2.57458	0.000335	CAL0003956		Predicted ORF in Assemblies 19, 20 and 21;possibly spurious ORF (Annotation Working Groupprediction)
orf19.7035	2.57119	4.31e-05	CAL0002015		Predicted ORF in Assemblies 19, 20 and 21
orf19.528	2.56876	6.22e-05	CAL0000129		Predicted ORF in Assemblies 19, 20 and 21
orf19.6114	2.56602	0.000113	CAL0005959		Predicted ORF in Assemblies 19, 20 and 21
orf19.2748	2.56191	0.000259	CAL0004233		Predicted zinc-finger protein of unknownfunction; has similarity to S. cerevisiae Arg81p, which isa transcription factor involved in the regulation ofarginine-responsive genes
orf19.5870	2.55871	4.7e-05	CAL0002428	CTP1	Predicted ORF in Assemblies 19, 20 and 21;flucytosine induced; amphotericin B repressed, caspofunginrepressed
orf19.2988	2.55825	7.82e-05	CAL0006134		Predicted ORF in Assemblies 19, 20 and 21
orf19.4311	2.55663	4.25e-05	CAL0000917	YNK1	Nucleoside diphosphate kinase (NDP kinase); homo-hexameric; soluble protein in hyphae; flucytosine induced;macrophage-induced protein
orf19.6855	2.55634	4.75e-05	CAL0005799		Predicted ORF in Assemblies 19, 20 and 21
orf19.5255	2.5553	0.000175	CAL0003568	PXA2	Putative peroxisomal, half-sizeadrenoleukodystrophy protein (ALD or ALDp) subfamily ABCtransporter; Gcn4p-regulated
orf19.759	2.55426	4.8e-05	CAL0001871		Predicted ORF in Assemblies 19, 20 and 21
orf19.1964	2.55027	0.00135456	CAL0002636		Decreased transcription is observed uponfluphenazine treatment; increased transcription isobserved upon benomyl treatment; regulated by Nrg1p,Tup1p
orf19.1014	2.54952	0.000323	CAL0001046		Predicted ORF from Assembly 19; removed from Assembly 20
orf19.2611	2.54414	8.17e-05	CAL0003376	MCM6	Protein described as part of MCM DNA replicationinitiation complex; RNA abundance regulated by tyrosol andcell density; transcription is repressed in response toalpha pheromone in SpiderM medium
orf19.4090.1	2.53607	0.000232	CAL0004961		Predicted ORF in Assemblies 19, 20 and 21
orf19.2843	2.53555	6.02e-05	CAL0005137	RHO1	Small GTPase of Rho family; regulates beta-1,3-glucan synthesis activity and binds Gsc1p; essential;expected to be geranylgeranylated bygeranylgeranyltransferase type I
orf19.5658	2.52794	9.49e-05	CAL0000673	MNN10	Protein with similarity to mannosyltransferases;fungal-specific (no human or murine homolog)
orf19.6435	2.52785	0.000138	CAL0002190		Predicted ORF in Assemblies 19, 20 and 21
orf19.5693	2.52403	2.7e-05	CAL0000746		Predicted ORF in Assemblies 19, 20 and 21
orf19.2351	2.52318	0.000112	CAL0000749	NIT3	Predicted ORF in Assemblies 19, 20 and 21;regulated by Gcn2p and Gcn4p
orf19.1672	2.51544	0.000606	CAL0000105		Predicted ORF in Assemblies 19, 20 and 21
orf19.5685	2.51508	0.0200854	CAL0000735	THS1	Putative threonyl-tRNA synthetase; transcriptionregulated by Mig1p and Tup1p; genes encoding ribosomalsubunits, translation factors, and tRNA synthetases aredownregulated upon phagocytosis by murine macrophage
orf19.2618	2.51472	5.03e-05	CAL0003388	MET2	Putative homoserine acetyltransferase; Gcn4p-regulated; macrophage/pseudohyphal-repressed; not greatlyinduced by biofilm formation, in contrast to many enzymesof sulfur amino acid metabolism; fungal-specific (no humanor murine homolog)
orf19.4845	2.51332	4.17e-05	CAL0005379		Predicted ORF in Assemblies 19, 20 and 21;fluconazole-induced
orf19.2187	2.51114	5.2e-05	CAL0005452	ALG7	Protein involved in cell wall mannanbiosynthesis; transcription is elevated in chk1, nik1, andsln1 homozygous null mutants
orf19.5999	2.51092	4.3e-05	CAL0003475	DYN1	Dynein heavy chain; dynein is a motor proteinthat moves toward the microtubule minus end; required forwild-type yeast-form cell separation, spindle positioning,nuclear migration, hyphal growth; transcription isregulated by Mig1p
orf19.789	2.50823	0.000147	CAL0001995	PYC2	Putative pyruvate carboxylase, binds to biotincofactor; gene is up-regulated in a mutant lacking theSsk1p response regulator protein, upon benomyl treatment,or in an azole-resistant strain overexpressing MDR1
orf19.5137.1	2.50667	9.3e-05	CAL0002554		Predicted ORF in Assemblies 19, 20 and 21;possibly spurious ORF (Annotation Working Groupprediction)
orf19.6579	2.50415	0.000152	CAL0003291		Predicted ORF in Assemblies 19, 20 and 21
orf19.4811	2.50295	3.46e-05	CAL0005311		Predicted ORF in Assemblies 19, 20 and 21
orf19.6474	2.50272	0.000126	CAL0002281		Predicted ORF in Assemblies 19, 20 and 21
orf19.6496	2.50257	0.0111697	CAL0002339	TRS33	Predicted ORF in Assemblies 19, 20 and 21;constitutive expression independent of MTL or white-opaquestatus
orf19.7116	2.49764	6.82e-05	CAL0002849		Predicted ORF in Assemblies 19, 20 and 21
orf19.898	2.49003	0.000187	CAL0002938	HEM2	Protein described as porphobilinogen synthase;transcriptionally regulated by iron; expression greater inhigh iron
orf19.7051	2.48518	0.0111837	CAL0002078		Predicted ORF in Assemblies 19, 20 and 21
orf19.3282	2.48357	5.75e-05	CAL0003413		Predicted ORF in Assemblies 19, 20 and 21
orf19.6849	2.47915	4.25e-05	CAL0005776	ELC1	Transcription is regulated by Nrg1p and Mig1p;regulated by Gcn2p and Gcn4p
orf19.231	2.47821	6.82e-05	CAL0003949		Predicted ORF in Assemblies 19, 20 and 21
orf19.2245	2.47698	0.000291	CAL0006268		Predicted ORF in Assemblies 19, 20 and 21
orf19.4646	2.47617	4.09e-05	CAL0003703		Predicted ORF in Assemblies 19, 20 and 21
orf19.3730	2.47286	0.000124	CAL0001163		Protein similar to S. cerevisiae Kre27p, whichhas a role in resistance to killer toxin; predicted Kex2psubstrate
orf19.3802	2.46977	0.000104	CAL0001900	PMT6	Protein mannosyltransferase, required forvirulence in mouse systemic infection and for adhesion toendothelium; has a role in hyphal growth signaling andhygromycin B sensitivity; not a major contributor tooverall cellular PMT activity
orf19.4246	2.46546	0.0010492	CAL0000225		Predicted ORF in Assemblies 19, 20 and 21;similar to S. cerevisiae Ykr070wp; transposon mutationaffects filamentous growth; Hog1p-downregulated; showscolony morphology-related gene regulation by Ssn6p;induced during cell wall regeneration
orf19.1223	2.46493	0.00523124	CAL0002833		Predicted ORF in Assemblies 19, 20 and 21
orf19.7052	2.4627	5.14e-05	CAL0002079		Predicted ORF in Assemblies 19, 20 and 21
orf19.945	2.46242	0.000126	CAL0003689	VPS2	Protein similar to S. cerevisiae Did4p/Vps2p,which is a member of the ESCRT III complex
orf19.4036	2.46081	0.000206	CAL0004774	APM1	Protein similar to S. cerevisiae Apm1, which isinvolved in vesicle transport; transposon mutation affectsfilamentous growth
orf19.7489	2.45096	0.000154	CAF0007125		ORF Predicted by Annotation Working Group
orf19.5007	2.44761	0.000283	CAL0001571	ACT1	Actin; gene has intron; transcriptionallyregulated by growth phase and by starvation; localizes topolarized growth site in budding and hyphal cells;required for wild-type Cdc42p localization; unprocessed Nterminus
orf19.3173	2.4455	3.8e-05	CAL0002393		Predicted ORF in Assemblies 19, 20 and 21
orf19.5008.1	2.44494	0.000139	CAF0007030		ORF Predicted by Annotation Working Group
orf19.993	2.43861	0.000813	CAL0003844		Predicted ORF in Assemblies 19, 20 and 21
orf19.6509	2.43555	7.37e-05	CAL0003046		Predicted ORF in Assemblies 19, 20 and 21
orf19.7286	2.4352	0.000243	CAL0003998	RPN7	Predicted ORF in Assemblies 19, 20 and 21;regulated by Gcn2p and Gcn4p
orf19.1244	2.43496	0.000125	CAL0002915	GYP2	Predicted ORF in Assemblies 19, 20 and 21
orf19.4587	2.43108	0.000571	CAL0002914	HGH1	Transcription is regulated by Mig1p
orf19.2919	2.42858	0.00028	CAL0005976	MPH1	Protein similar to S. cerevisiae Mph1p, which isa DNA helicase involved in DNA repair; induced underhydroxyurea treatment
orf19.7368	2.42634	0.000108	CAL0004726		Predicted ORF in Assemblies 19, 20 and 21
orf19.2016	2.42556	5.29e-05	CAL0004337		Predicted ORF in Assemblies 19, 20 and 21
orf19.7312	2.42354	8.22e-05	CAL0004537	ERG13	Protein similar to S. cerevisiae Erg13p, whichis involved in ergosterol biosynthesis; transposonmutation affects filamentous growth; amphotericin B,caspofungin repressed
orf19.4346	2.41939	0.000326	CAL0001016		Predicted ORF in Assemblies 19, 20 and 21
orf19.6538	2.41754	0.000132	CAL0003162		Predicted ORF in Assemblies 19, 20 and 21
orf19.2087	2.41694	0.000243	CAL0004532		Predicted ORF in Assemblies 19, 20 and 21
orf19.2610	2.41358	0.000272	CAL0003374		Predicted ORF in Assemblies 19, 20 and 21
orf19.5964	2.41013	6.5e-05	CAF0007060	RPL35	Protein described as a ribosomal protein;downregulation correlates with clinical development offluconazole resistance; shows colony morphology-relatedgene regulation by Ssn6p
orf19.1212	2.41013	8.15e-05	CAL0002790		Predicted ORF in Assemblies 19, 20 and 21
orf19.6076	2.4081	0.000191	CAL0005193		Predicted ORF in Assemblies 19, 20 and 21
orf19.4829	2.40805	7.55e-05	CAL0005343	DOA1	Protein with WD-repeats and a mellitin-likesequence, similar to &lt;i&gt;S. cerevisiae&lt;/i&gt; Doa1p, which isinvolved in ubiquitin-mediated protein degradation
orf19.7285	2.39836	4.23e-05	CAL0003996		Predicted ORF in Assemblies 19, 20 and 21
orf19.2075	2.39833	4.93e-05	CAL0004498	DFG5	N-linked mannoprotein of cell wall and membrane;possible signal transducer; role in hyphal growth and HWP1induction in alkaline pH; GPI modification predicted; dfg5dcw1 double mutant is inviable; caspofungin-induced,fungal-specific
orf19.6313.2	2.39697	0.000338	CAL0001260	MNT4	Transcriptionally regulated by iron; expressiongreater in low iron; similar to mannosyltransferases
orf19.923	2.39599	9.56e-05	CAL0003628	THR1	Putative homoserine kinase; fungal-specific (nohuman or murine homolog); transcription is regulated byTup1p; amphotericin B repressed; regulated by Gcn2p andGcn4p
orf19.2822	2.39596	0.000317	CAL0005079		Predicted ORF in Assemblies 19, 20 and 21;possibly spurious ORF (Annotation Working Groupprediction)
orf19.2873	2.39591	5.76e-05	CAL0005199	TOP2	DNA topoisomerase II; catalyzes ATP-dependentDNA relaxation and decatenation in vitro; Y842 predictedto be catalytic; functional homolog of S. cerevisiaeTop2p; sensitive to amsacrine or doxorubicin; farnesol-upregulated in biofilm
orf19.641	2.39538	7.82e-05	CAL0001004		Predicted ORF in Assemblies 19, 20 and 21
orf19.2923	2.39207	0.000476	CAL0005989		Predicted ORF in Assemblies 19, 20 and 21;transcription is induced in response to alpha pheromone inSpiderM medium
orf19.1186	2.38781	0.000155	CAL0002131		Predicted ORF in Assemblies 19, 20 and 21;possibly spurious ORF (Annotation Working Groupprediction)
orf19.2965	2.38077	6.52e-05	CAL0006081		Predicted ORF in Assemblies 19, 20 and 21
orf19.7382	2.37882	0.000154	CAL0004797	CAM1	Putative translation elongation factor eEF1gamma
orf19.374	2.37382	0.00146021	CAL0004888		Predicted ORF in Assemblies 19, 20 and 21
orf19.3207	2.37165	9.3e-05	CAL0003199	CCN1	G1 cyclin; required for hyphal growthmaintenance (not initiation); cell-cycle regulatedtranscription (G1/S); Cdc28p-Ccn1p initiates Cdc11p S394phosphorylation on hyphal induction; expression in S.cerevisiae inhibits pheromone response
orf19.1136	2.36732	0.00250412	CAL0001966		Predicted ORF in Assemblies 19, 20 and 21
orf19.4718	2.36681	0.000125	CAL0004378	TRP5	Predicted tryptophan synthase; Gcn4p-regulated;upregulated in biofilm; identified in detergent-resistantmembrane fraction (possible lipid raft component);predicted N-terminal acetylation; S. cerevisiae orthologis Gcn4p regulated
orf19.2549	2.36591	4.22e-05	CAL0002468		Predicted ORF in Assemblies 19, 20 and 21
orf19.5956	2.36331	0.000428	CAL0003378		Predicted ORF in Assemblies 19, 20 and 21
orf19.3930	2.35746	0.000259	CAL0002925	YUH2	Predicted ORF in Assemblies 19, 20 and 21;described as similar to ubiquitin carboxyl-terminalhydrolases
orf19.5411	2.3536	0.000173	CAL0005180		Predicted ORF in Assemblies 19, 20 and 21
orf19.1295	2.35079	0.000144	CAL0003105	VAS1	Putative tRNA-Val synthetase; genes encodingribosomal subunits, translation factors, and tRNAsynthetases are downregulated upon phagocytosis by murinemacrophage
orf19.1683	2.34686	0.000111	CAL0000149	PPH21	Predicted ORF in Assemblies 19, 20 and 21;caspofungin repressed
orf19.2746	2.33807	0.0355353	CAL0004231		Predicted ORF in Assemblies 19, 20 and 21
orf19.4867	2.33701	0.000571	CAL0005438	SWE1	Functional homolog of S. cerevisiae Swe1p;mutant cells are small, rounded, and sometimes binucleate;not required for filamentous growth; transcription isrepressed in response to alpha pheromone in SpiderMmedium
orf19.6177	2.33473	5.69e-05	CAL0006100		Predicted ORF in Assemblies 19, 20 and 21;possibly spurious ORF (Annotation Working Groupprediction)
orf19.5352	2.32818	0.000309	CAL0004327		Protein not essential for viability
orf19.2837	2.32502	0.000108	CAL0005117	ALG5	Putative glucosyltransferase involved in cellwall mannan biosynthesis
orf19.20	2.32475	6.28e-05	CAL0000518	RTS1	Transcription is regulated upon yeast-hyphalswitch
orf19.250	2.32475	0.000243	CAL0004001	SLC1	Protein repressed during the mating process
orf19.2217	2.32337	0.00089	CAL0006192		Predicted ORF from Assembly 19; merged with orf19.1860.1 in Assembly 20
orf19.1514	2.31936	5.85e-05	CAL0005407		Predicted ORF in Assemblies 19, 20 and 21
orf19.4390	2.31839	0.000421	CAL0001169		Predicted ORF in Assemblies 19, 20 and 21;transcription is repressed in response to alpha pheromonein SpiderM medium
orf19.198	2.31659	6.34e-05	CAL0003290	ASN1	Protein described as asparagine synthetase;soluble protein in hyphae; regulated by Rim101p; decreasedexpression at pH 4 compared to pH 8
orf19.3873	2.31423	6.68e-05	CAL0002151	ARC40	Protein similar to S. cerevisiae Arc40p, whichis involved in actin filament organization in S.cerevisiae; transposon mutation affects filamentousgrowth
orf19.7421	2.30363	9.84e-05	CAL0005487	CYP5	Protein described as a peptidyl-prolyl cis-transisomerase; macrophage-downregulated protein level
orf19.2378	2.30194	0.000215	CAL0000790		Predicted ORF in Assemblies 19, 20 and 21
orf19.6701	2.30038	0.000573	CAL0004698		Predicted ORF in Assemblies 19, 20 and 21
orf19.273	2.29574	0.000381	CAL0004059		Predicted ORF in Assemblies 19, 20 and 21
orf19.1553	2.2954	6.5e-05	CAL0005527	ENT3	Protein induced during the mating process
orf19.3240	2.29399	0.000232	CAL0003306	ERG27	3-Keto sterol reductase of ergosterolbiosynthesis; acts in C-4 sterol demethylation with Erg25pand Erg26p; possible drug target, essential for viability;functional homolog of S. cerevisiae Erg27p
orf19.6638	2.29151	0.00293166	CAL0004020	PTC4	Protein described as a serine/threoninephosphatase, type PP2C; decreased expression in hyphaecompared to yeast-form cells
orf19.4373	2.29045	0.000101	CAL0001108		Protein similar to S. cerevisiae Fmn1p, which isriboflavin kinase; predicted Kex2p substrate
orf19.710	2.28406	0.00161774	CAL0001737		Protein described as beta subunit of succinate-CoA ligase; transcription regulated by Mig1p and Tup1p; transcriptionally regulated by iron; expression greater in high iron; merged with orf19.1860 in Assembly 20
orf19.6852	2.28211	0.000182	CAL0005792		Predicted ORF in Assemblies 19, 20 and 21
orf19.2951	2.28129	0.000182	CAL0006049	HOM6	Protein described as homoserine dehydrogenase;regulated by Gcn4p; induced in response to amino acidstarvation (3-aminotriazole treatment); macrophage-inducedprotein
orf19.3872	2.27911	0.000264	CAL0002150		Predicted ORF in Assemblies 19, 20 and 21
orf19.1829	2.27434	7.82e-05	CAL0001636		Predicted ORF from Assembly 19; merged with orf19.2663 in Assembly 20
orf19.5254	2.26992	0.000404	CAL0003567		Predicted ORF in Assemblies 19, 20 and 21;repressed by nitric oxide
orf19.3592	2.26816	9.3e-05	CAL0006020		Predicted ORF in Assemblies 19, 20 and 21
orf19.1535	2.26565	0.000349	CAL0005474		Predicted ORF in Assemblies 19, 20 and 21;possibly spurious ORF (Annotation Working Groupprediction)
orf19.3166	2.2572	0.000441	CAL0002369		Predicted ORF in Assemblies 19, 20 and 21
orf19.1621	2.25627	7.13e-05	CAL0006364	GPA2	G-protein alpha subunit; regulates filamentousgrowth; reports differ on a role in cAMP-mediated glucosesignaling, cAMP-PKA pathway, MAP kinase cascade; Gpr1p Cterminus binds Gpa2p; regulates HWP1 and ECE1
orf19.6078.1	2.25543	0.00033	CAL0005195	POL93	Putative gypsy-like reverse transcriptase;transcription is downregulated in response to treatmentwith ciclopirox olamine; induced upon biofilm formation
orf19.6007	2.25528	0.000473	CAL0005022		Predicted ORF in Assemblies 19, 20 and 21
orf19.2721	2.25366	0.00532461	CAL0004196		Predicted ORF in Assemblies 19, 20 and 21
orf19.3519	2.25359	0.00159013	CAL0005818	SUA72	Predicted transcriptional regulator; inducedduring planktonic growth, whereas related SUA71 isdownregulated
orf19.2452	2.2532	0.001	CAL0001554		Transcriptionally regulated by iron; expressiongreater in high iron; downregulated in core caspofunginresponse; ketoconazole-repressed; shows colony morphology-related gene regulation by Ssn6p; possibly subject toKex2p processing
orf19.213	2.24932	0.000154	CAL0003893		Predicted ORF in Assemblies 19, 20 and 21
orf19.3411	2.2482	0.000979	CAL0004890		Predicted ORF in Assemblies 19, 20 and 21
orf19.4002	2.24681	0.0135764	CAL0004640	DUN1	Protein similar to S. cerevisiae Dun1p, which isa serine-threonine protein kinase involved in DNA damagecell-cycle checkpoint; induced under Cdc5p depletion
orf19.2903	2.24581	8.67e-05	CAL0005941		Predicted ORF in Assemblies 19, 20 and 21;hyphal-induced expression, regulated by Cyr1p, Ras1p,Efg1p, Nrg1p, Tup1p
orf19.2663	2.24259	0.00410257	CAL0003492		Predicted ORF in Assemblies 19, 20 and 21
orf19.417	2.2419	0.000593	CAL0005580		Predicted ORF in Assemblies 19, 20 and 21
orf19.782	2.24113	0.00161302	CAL0001978		Predicted ORF in Assemblies 19, 20 and 21
orf19.7453	2.23906	0.000442	CAL0005581		Predicted ORF in Assemblies 19, 20 and 21;possibly spurious ORF (Annotation Working Groupprediction)
orf19.319	2.23792	0.00614866	CAL0004673		Predicted ORF in Assemblies 19, 20 and 21
orf19.52	2.23653	0.000194	CAL0000602		Predicted ORF in Assemblies 19, 20 and 21
orf19.3974	2.23537	0.000473	CAL0003096	PUT2	Alkaline upregulated
orf19.668	2.23306	0.000511	CAL0001066		Predicted ORF in Assemblies 19, 20 and 21
orf19.4060	2.23269	0.000104	CAL0004867	ARO4	3-Deoxy-D-arabinoheptulosonate-7-phosphatesynthase; enzyme of aromatic amino acid biosynthesis; GCN-regulated; feedback-inhibited by tyrosine when produced inS. cerevisiae; fungal-specific; Aro3p and Aro4p catalyzethe same reaction
orf19.3247	2.2282	0.000637	CAL0003321		Predicted ORF in Assemblies 19, 20 and 21;putative ortholog of S. cerevisiae Yjl207cp; likely to beessential for growth, based on an insertional mutagenesisstrategy
orf19.5840	2.22335	6.41e-05	CAL0002347		Predicted ORF in Assemblies 19, 20 and 21
orf19.1500	2.22278	0.00157266	CAL0005377		Predicted ORF in Assemblies 19, 20 and 21
orf19.3273	2.22182	0.000132	CAL0003387		Predicted ORF in Assemblies 19, 20 and 21
orf19.1394	2.22122	0.00013	CAL0003971		Protein not essential for viability
orf19.4257	2.2209	0.000344	CAL0000261	INT1	Integrin-like protein; role in morphogenesis,adhesion, and mouse cecal colonization and systemicvirulence; similar to S. cerevisiae Bud4p (has role in budsite selection); structurally similar to alpha-subunit ofhuman leukocyte integrins
orf19.2088	2.21823	0.000165	CAL0004533		Predicted ORF in Assemblies 19, 20 and 21
orf19.117	2.21776	0.000377	CAL0002999		Predicted ORF in Assemblies 19, 20 and 21
orf19.3936	2.21726	0.00116429	CAL0002940		Predicted ORF in Assemblies 19, 20 and 21;induced upon biofilm formation
orf19.4525	2.21714	0.000551	CAL0002692		Predicted ORF in Assemblies 19, 20 and 21
orf19.1925	2.21622	0.000532	CAL0002538	TLO5	Member of a family of telomere-proximal genes ofunknown function; may be spliced in vivo
orf19.6713	2.20926	0.00971884	CAL0004746		Predicted ORF in Assemblies 19, 20 and 21
orf19.7523	2.20295	0.000155	CAL0000003	MKC1	MAP kinase; role in biofilm formation, contact-induced invasive filamentation, systemic virulence inmouse, cell wall structure/maintenance, caspofunginresponse; phosphorylated on surface contact, membraneperturbation, or cell wall stress
orf19.6324	2.20287	0.000218	CAL0001289	VID27	Protein similar to S. cerevisiae Vid27p;transposon mutation affects filamentous growth; fungal-specific (no human or murine homolog)
orf19.1273	2.20227	0.00038	CAL0003018		Predicted ORF in Assemblies 19, 20 and 21
orf19.5238	2.20195	0.000219	CAL0003543		Predicted ORF in Assemblies 19, 20 and 21
orf19.5680	2.20091	0.00068	CAL0000728		Predicted ORF in Assemblies 19, 20 and 21
orf19.5735	2.19808	0.000885	CAF0007054		ORF Predicted by Annotation Working Group
orf19.4623.3	2.19653	0.000507	CAL0003638		Predicted ORF in Assemblies 19, 20 and 21;possibly spurious ORF (Annotation Working Groupprediction)
orf19.7076	2.1952	9.3e-05	CAL0002144		Predicted ORF in Assemblies 19, 20 and 21
orf19.7383	2.19249	0.000401	CAL0004800	MNN9	Protein of N-linked outer-chain mannanbiosynthesis; mutant has defective cell wall; required forwild-type hyphal growth; mutant is hygromycin B sensitiveand vanadate resistant; has N-terminal membrane-spanningsegment (positions 18-34)
orf19.4054	2.19217	0.000437	CAL0004845	CTA24	Putative transcriptional activator,downregulated by Efg1p; member of a family of telomere-proximal genes
orf19.2622	2.18737	0.000745	CAL0003404		Predicted ORF in Assemblies 19, 20 and 21 (seeLocus History Note for Assembly 19 correction)
orf19.3080	2.18683	0.000242	CAL0001496		Predicted ORF in Assemblies 19, 20 and 21
orf19.2101	2.18609	6.3e-05	CAL0005262		Predicted ORF in Assemblies 19, 20 and 21
orf19.3467	2.18429	0.000283	CAL0005039		Predicted ORF in Assemblies 19, 20 and 21
orf19.7491	2.18285	0.00023	CAL0005733		Predicted ORF in Assemblies 19, 20 and 21
orf19.7571	2.18266	8.67e-05	CAL0000163	UBC4	Protein similar to S. cerevisiae ubiquitinconjugating enzyme Ubc4p
orf19.3001	2.17982	0.000832	CAL0001322	TEM1	Protein similar to S. cerevisiae Tem1p, which isa GTPase involved in termination of the M phase of thecell cycle; induced under Cdc5p depletion
orf19.2146	2.1761	0.000586	CAL0005349		Predicted ORF in Assemblies 19, 20 and 21
orf19.4030	2.17451	9.45e-05	CAL0004759		Predicted ORF in Assemblies 19, 20 and 21
orf19.6893	2.17438	0.000249	CAL0005917		Predicted ORF in Assemblies 19, 20 and 21
orf19.3226	2.17235	0.000158	CAL0003259		Predicted ORF in Assemblies 19, 20 and 21
orf19.1792	2.17051	0.00110723	CAL0000995		Predicted ORF in Assemblies 19, 20 and 21
orf19.5340	2.16901	0.00210913	CAL0004309		Predicted ORF in Assemblies 19, 20 and 21
orf19.6448	2.16785	0.000107	CAL0002218		Predicted ORF in Assemblies 19, 20 and 21
orf19.7228	2.16718	0.0256221	CAL0003808		Predicted ORF in Assemblies 19, 20 and 21
orf19.5669	2.15748	0.000924	CAL0000699		Predicted ORF in Assemblies 19, 20 and 21
orf19.200	2.1562	9e-05	CAL0003866		Predicted ORF in Assemblies 19, 20 and 21
orf19.2974	2.15574	9.28e-05	CAL0006106		Predicted ORF in Assemblies 19, 20 and 21
orf19.7141	2.15535	0.000295	CAL0002968	UFE1	Protein interacting with Sec20p, possiblyinvolved in retrograde transport between the Golgi and theendoplasmic reticulum; functional homolog of S. cerevisiaeUfe1p, which is an ER t-SNARE that mediates the retrogradetraffic
orf19.3615	2.15468	0.00110396	CAL0000313		Predicted ORF in Assemblies 19, 20 and 21;induced in core caspofungin response; increased expressionobserved in an ssr1 homozygous null mutant; induced bynitric oxide in yhb1 mutant
orf19.3140.1	2.15241	0.000145	CAL0002307		Predicted ORF in Assemblies 19, 20 and 21
orf19.6643	2.15018	0.00294526	CAL0004034	MCT1	Putative malonyl-CoA acyl carrier proteinacyltransferase
orf19.4643	2.14837	0.000139	CAL0003698		Predicted ORF in Assemblies 19, 20 and 21
orf19.7290	2.14562	0.00646514	CAL0004008		Predicted ORF in Assemblies 19, 20 and 21
orf19.1170	2.14554	0.000691	CAL0002091	ARO7	Putative chorismate mutase; fungal-specific (nohuman or murine homolog); alkaline upregulated
orf19.5171	2.14432	0.000103	CAL0002654	PMT1	Protein mannosyltransferase, required forvirulence in mouse systemic infection and for adhesion toepithelial cells; has a role in hyphal growth and drugsensitivity; Als1p, Sec20p, Kre9p, Pir1p are substrates;one of 5 PMT family members
orf19.3761	2.14227	0.00039	CAL0001241	CDC54	Transcription is regulated by Nrg1p and Mig1p
orf19.4521	2.14163	0.000118	CAL0002684		Predicted ORF in Assemblies 19, 20 and 21;hyphal-induced expression
orf19.5487	2.13998	0.000272	CAL0005346	CDC46	Protein described as having role in control ofcell division; RNA abundance regulated by tyrosol and celldensity; Plc1p-regulated; transcription is repressed inresponse to alpha pheromone in SpiderM medium
orf19.6994	2.13812	0.000107	CAL0000414	BAT22	Protein described as a branched chain amino acidaminotransferase; regulated by Gcn4p; induced in responseto amino acid starvation (3-aminotriazole treatment)
orf19.1352	2.13666	0.000175	CAL0003855		Predicted ORF in Assemblies 19, 20 and 21
orf19.4665	2.13444	0.00280835	CAL0003755		Predicted ORF in Assemblies 19, 20 and 21
orf19.2138	2.12948	0.000192	CAL0005329	ILS1	Protein similar to isoleucyl-tRNA synthetase;isoleucyl-tRNA synthetase is the target of drugs includingthe cyclic beta-amino acid icofungipen/PLD-118/BAY-10-8888and mupirocin
orf19.7673	2.12921	0.0018277	CAL0000979		Predicted ORF in Assemblies 19, 20 and 21
orf19.7127	2.1234	0.000822	CAF0007116		ORF Predicted by Annotation Working Group
orf19.1191	2.11668	0.00196964	CAL0002157		Predicted ORF in Assemblies 19, 20 and 21
orf19.3294	2.11257	0.000402	CAL0003442	MBF1	Predicted ORF in Assemblies 19, 20 and 21;caspofungin repressed
orf19.2975	2.11238	0.0139709	CAL0006107	YPT7	Protein of YPT/RAB family; induced during themating process
orf19.5184	2.10881	0.000428	CAL0002697		Predicted ORF in Assemblies 19, 20 and 21
orf19.2863.1	2.10849	0.000178	CAL0005172		Predicted ORF in Assemblies 19, 20 and 21;possibly spurious ORF (Annotation Working Groupprediction)
orf19.2960	2.1076	0.000156	CAL0006075	FRS2	Putative tRNA-Phe synthetase; genes encodingribosomal subunits, translation factors, and tRNAsynthetases are downregulated upon phagocytosis by murinemacrophage
orf19.760	2.10576	0.000154	CAL0001889		Predicted ORF in Assemblies 19, 20 and 21
orf19.1160	2.1042	0.000298	CAL0002067		Predicted ORF in Assemblies 19, 20 and 21
orf19.2740	2.10208	0.0498925	CAL0004227		Predicted ORF in Assemblies 19, 20 and 21
orf19.5692	2.10161	0.00154138	CAL0000745		Predicted ORF in Assemblies 19, 20 and 21
orf19.7097	2.10141	0.00035	CAL0002199		Predicted ORF in Assemblies 19, 20 and 21
orf19.645.1	2.09958	0.000122	CAF0006905		ORF Predicted by Annotation Working Group
orf19.284	2.09838	0.00638236	CAL0004085		Predicted ORF in Assemblies 19, 20 and 21
orf19.1426	2.09427	0.000587	CAL0004525		Predicted ORF in Assemblies 19, 20 and 21
orf19.1107	2.0933	0.00523124	CAL0001857		Predicted ORF in Assemblies 19, 20 and 21
orf19.5156	2.09282	0.000587	CAL0002593		Predicted ORF in Assemblies 19, 20 and 21; hassix putative membrane-spanning regions; similar to S.cerevisiae Yjl097p, which is required for growth
orf19.3225	2.09082	0.000166	CAL0003256		Predicted ORF in Assemblies 19, 20 and 21
orf19.7544	2.07718	0.000364	CAL0000053	TLO1	Member of a family of telomere-proximal genes ofunknown function; hyphal-induced expression
orf19.3100	2.076	0.000795	CAL0002211		Predicted ORF in Assemblies 19, 20 and 21;transcription is repressed in response to alpha pheromonein SpiderM medium
orf19.6524	2.0715	0.000425	CAL0003116		Predicted ORF in Assemblies 19, 20 and 21
orf19.5209	2.07083	0.00919856	CAL0003489		Predicted ORF in Assemblies 19, 20 and 21
orf19.5369	2.06666	0.000292	CAL0004363		Predicted ORF in Assemblies 19, 20 and 21
orf19.2250	2.06279	0.000187	CAL0006284		Predicted ORF in Assemblies 19, 20 and 21
orf19.3057	2.06112	0.00161302	CAL0001437		Predicted ORF in Assemblies 19, 20 and 21
orf19.350	2.05924	0.000452	CAL0004819	PRE9	Alpha3 (C9) subunit of the 20S proteasome;transcription is regulated by Mig1p
orf19.5325	2.05816	0.00604694	CAL0004280	KIN3	Protein similar to S. cerevisiae Kin3p; inducedunder Cdc5p depletion
orf19.269	2.05622	0.000243	CAL0004049	SES1	Seryl-tRNA synthetase; charges the tRNA thatrecognizes the CUG codon, which typically specifies Leu,but specifies Ser in C. albicans; complements S.cerevisiae ses1 mutant viability; soluble protein inhyphae; macrophage-regulated
orf19.2940	2.05544	0.00175263	CAL0006034		Predicted ORF in Assemblies 19, 20 and 21
orf19.806	2.05362	0.000444	CAL0002611	VMA7	Putative subunit of the V-ATPase complex, whichis involved in control of vacuolar pH; highly similar toS. cerevisiae Vma7p; interacts with phosphatidylinositol 3-kinase Vps34p
orf19.199	2.05181	0.000344	CAL0003292		Predicted ORF in Assemblies 19, 20 and 21;hyphal-induced expression; greater mRNA abundance observedin a cyr1 homozygous null mutant than in wild type
orf19.6021	2.05101	0.000309	CAL0005068	IHD2	Transcriptionally regulated by iron and by yeast-hyphal switching; expression greater in low iron
orf19.4865	2.04799	0.000107	CAL0005434		Predicted ORF in Assemblies 19, 20 and 21
orf19.793	2.04762	0.00015	CAL0002021	CAK1	Monomeric CDK-activating kinase (CAK);functional homolog of S. cerevisiae Cak1p; phosphorylatescyclin-free human CDK2; lacks glycine loop motif;conserved lysine (K36) not required for activity
orf19.1897	2.04708	0.00480831	CAL0001829		Predicted ORF in Assemblies 19, 20 and 21
orf19.5561	2.04637	0.000693	CAL0006201	RAV2	Protein similar to S. cerevisiae Rav2p, which isinvolved in acidification of the vacuole; transposonmutation affects filamentous growth
orf19.3616	2.04442	0.000139	CAL0000316	ERG9	Putative farnesyl-diphosphate farnesyltransferase (squalene synthase) involved in the sterolbiosynthesis pathway; likely to be essential for growth;regulated by fluconazole and lovastatin; amphotericin B,caspofungin repressed
orf19.7084	2.04406	0.000525	CAL0002174		Predicted ORF in Assemblies 19, 20 and 21
orf19.1935	2.04358	0.000797	CAL0002563		Predicted ORF in Assemblies 19, 20 and 21;possibly spurious ORF (Annotation Working Groupprediction)
orf19.2347	2.04346	0.00210913	CAL0000743	MNN2	Alpha-1,2-mannosyltransferase; likely involvedin iron utilization in the endocytosis pathway under iron-limiting conditions; similar to S. cerevisiae Mnn2p andMnn5p; transposon mutation affects filamentous growth;filament induced
orf19.1814	2.04299	0.00072	CAL0001601		Predicted ORF in Assemblies 19, 20 and 21
orf19.5650	2.04285	0.000286	CAL0000661	PRO3	Protein induced during the mating process;alkaline upregulated
orf19.6534.2	2.04256	0.00157926	CAL0003151		Predicted ORF in Assemblies 19, 20 and 21
orf19.5647	2.0398	0.00103749	CAL0000645	SUB2	Transcription is regulated by Mig1p
orf19.30	2.03876	0.000216	CAL0000546		Predicted ORF in Assemblies 19, 20 and 21
orf19.3965	2.03859	0.00263689	CAL0003053		Predicted ORF in Assemblies 19, 20 and 21;possibly spurious ORF (Annotation Working Groupprediction)
orf19.1666	2.03663	0.000247	CAL0000072		Predicted ORF in Assemblies 19, 20 and 21;transcription is induced in response to alpha pheromone inSpiderM medium
orf19.2365	2.03659	0.000136	CAL0000768	POL2	Protein described as DNA polymerase epsilon;transcriptionally induced by interaction with macrophage;transcription is regulated by Tup1p
orf19.4122	2.03515	0.0297546	CAL0005629		Predicted ORF in Assemblies 19, 20 and 21
orf19.1301	2.03143	0.000387	CAL0003699		Predicted ORF in Assemblies 19, 20 and 21
orf19.1936	2.03025	0.00027	CAL0002564	SNF1	Essential protein; functional homolog of S.cerevisiae Snf1p, which is a regulator of sugarmetabolism; constitutively expressed; up-regulationassociated with azole resistance
orf19.5841	2.02979	0.0159281	CAL0002348		Predicted ORF in Assemblies 19, 20 and 21;possibly spurious ORF (Annotation Working Groupprediction)
orf19.7224	2.0291	0.0150509	CAL0003803		Predicted ORF in Assemblies 19, 20 and 21
orf19.1373	2.02232	0.00258516	CAL0003909		Predicted ORF in Assemblies 19, 20 and 21
orf19.7269	2.02154	0.00022	CAL0003938		Predicted ORF in Assemblies 19, 20 and 21
orf19.7110	2.02037	0.00754581	CAL0002843		Predicted ORF in Assemblies 19, 20 and 21
orf19.405	2.01658	0.0014067	CAL0005539	VCX1	Putative H+/Ca2+ antiporter; fungal-specific (nohuman or murine homolog)
orf19.3489	2.01644	0.000606	CAL0005096	ARO22	Putative chorismate synthase; fungal-specific (no human or murine homolog); merged with orf19.1986 in Assembly 20
orf19.2698	2.01483	0.000166	CAL0003552		Predicted ORF in Assemblies 19, 20 and 21
orf19.7025	2.01299	0.000145	CAL0001975	MCM1	Putative transcription factor with MADS domainDNA-binding motif; regulator of hyphal growth; similar toS. cerevisiae Mcm1p; greater expression in white than inopaque phase cells; intron in 5'-UTR
orf19.7519	2.00991	0.00065	CAL0006393		Predicted ORF in Assemblies 19, 20 and 21
orf19.652	2.00937	0.00765389	CAL0001028		Predicted ORF in Assemblies 19, 20 and 21
orf19.7419	2.00878	0.000798	CAL0005459	HNT2	Predicted ORF in Assemblies 19, 20 and 21;induced upon low-level peroxide stress
orf19.631	2.00829	0.00054	CAL0000970		Predicted ORF from Assembly 19; merged with orf19.2661 in Assembly 20
orf19.5357	2.00808	0.000192	CAL0004333	AKL1	Protein induced during the mating process
orf19.6553	2.00719	0.000146	CAL0003209		Predicted ORF in Assemblies 19, 20 and 21
orf19.24	2.00706	0.00122405	CAL0000522	RTA2	Stress-associated protein; ketoconazole,caspofungin induced; Plc1p-regulated; transcription isincreased in a strain resistant to amphotericin B andfluconazole, compared to a wild-type strain
orf19.719	2.00694	0.000424	CAL0001749		Predicted ORF in Assemblies 19, 20 and 21
orf19.4704	2.00294	0.0457988	CAL0004346	ARO1	Putative pentafunctional arom enzyme; fungal-specific (no human or murine homolog); Gcn2p-, Gcn4p-regulated
orf19.1723	2.00264	0.000317	CAL0000804		Predicted ORF in Assemblies 19, 20 and 21
orf19.4028	1.99998	0.00271655	CAL0004730		Predicted ORF in Assemblies 19, 20 and 21
orf19.6191	1.99801	0.000193	CAL0006142	TLO8	Member of a family of telomere-proximal genes ofunknown function; may be spliced in vivo
orf19.7537	1.99598	0.00054	CAL0000025	BNR1	Formin; probable role in hyphal cytoskeletalpolarity; synthetic lethality if Bnr1p and Bni1p areabsent
orf19.1738	1.99464	0.000744	CAF0006929		ORF Predicted by Annotation Working Group
orf19.7672	1.99293	0.000883	CAL0000977		Predicted ORF in Assemblies 19, 20 and 21
orf19.4545	1.99161	0.000932	CAL0002762	SWI4	Predicted ORF in Assemblies 19, 20 and 21
orf19.3386	1.99096	0.000245	CAF0007108		ORF Predicted by Annotation Working Group; removed from Assembly 20
orf19.1342	1.99025	0.000527	CAL0003822	SHM1	Mitochondrial serine hydroxymethyltransferase;complements the glycine auxotrophy of an S. cerevisiaeshm1 null shm2 null gly1-1 triple mutant
orf19.7667	1.99021	0.00139455	CAL0000954	IAH1	Protein similar to S. cerevisiae Iah1p, which isinvolved in acetate metabolism; transposon mutationaffects filamentous growth
orf19.6810	1.99008	0.000177	CAL0005649		Predicted ORF in Assemblies 19, 20 and 21
orf19.7292	1.98917	0.000441	CAL0004013	ARP2	Predicted ORF in Assemblies 19, 20 and 21;regulated by Gcn2p and Gcn4p
orf19.6065	1.98852	0.00049	CAL0005167		Gene transcription regulated by Mig1p and Tup1p;amphotericin B, caspofungin repressed
orf19.2051	1.9878	0.0010212	CAL0004433		Predicted ORF in Assemblies 19, 20 and 21
orf19.2263	1.9862	0.000936	CAL0006316		Predicted ORF in Assemblies 19, 20 and 21
orf19.6846	1.9832	0.000412	CAL0005766	PHO85	Functional homolog of S. cerevisiae Pho85p,which is a cyclin-dependent kinase that regulatesprocesses including transcription of PHO genes involved inphosphate metabolism; gene has intron
orf19.1594	1.98243	0.00755059	CAL0005681		Predicted ORF from Assembly 19; possibly spurious ORF (Annotation Working Group prediction); merged with orf19.792 in Assembly 20
orf19.193	1.98219	0.0137701	CAL0003272		Predicted ORF in Assemblies 19, 20 and 21;possibly spurious ORF (Annotation Working Groupprediction)
orf19.5823	1.98064	0.000203	CAL0002299	SGT2	Protein abundance is affected by URA3 expressionin the CAI-4 strain background; transcription is regulatedby Mig1p
orf19.2573	1.97846	0.000163	CAL0002521	FRS1	Protein similar to the beta subunit of S.cerevisiae phenylalanyl-tRNA synthetase; possible role inearly cell wall biosynthesis; translation-related genesare downregulated upon phagocytosis by murine macrophage
orf19.2293	1.97826	0.00281911	CAL0006409		Predicted ORF from Assembly 19; merged with orf19.175 in Assembly 20
orf19.5467	1.97816	0.000818	CAL0005302	TLO7	Member of a family of telomere-proximal genes ofunknown function; may be spliced in vivo
orf19.1143	1.97706	0.00317987	CAL0002005		Predicted ORF in Assemblies 19, 20 and 21
orf19.5239	1.97555	0.000504	CAL0003544		Predicted ORF in Assemblies 19, 20 and 21;oxidative stress-induced via Cap1p
orf19.5444	1.9755	0.000331	CAL0005261		Predicted ORF in Assemblies 19, 20 and 21
orf19.7258	1.97466	0.000379	CAL0003905	DDI1	Predicted ORF in Assemblies 19, 20 and 21;macrophage/pseudohyphal-repressed
orf19.2412	1.97282	0.00482971	CAL0001472		Predicted ORF in Assemblies 19, 20 and 21
orf19.6057	1.97245	0.00214362	CAL0005148		Predicted ORF in Assemblies 19, 20 and 21
orf19.1359	1.97064	0.000916	CAL0003865		Predicted ORF in Assemblies 19, 20 and 21
orf19.6905	1.96958	0.000222	CAL0000122		Predicted ORF in Assemblies 19, 20 and 21
orf19.3846	1.96935	0.00227765	CAL0002066	LYS4	Protein described as homoaconitase; regulated byGcn4p, Gcn2p; induced in response to amino acid starvation(3-aminotriazole treatment); upregulated in the presenceof human whole blood or polymorphonuclear (PMN) cells
orf19.7658	1.96801	0.00048	CAL0000922	RFC4	Predicted ORF in Assemblies 19, 20 and 21;flucytosine induced
orf19.1597	1.96702	0.0002	CAL0005684	ABG1	Vacuolar membrane protein; depletion causesabnormal vacuolar morphology, cell separation defect,sensitivity to cell wall perturbation, and increasedhyphal branching; essential gene with no mammalianhomolog; Cyr1p-regulated
orf19.3353	1.96648	0.000175	CAL0004155		Protein described as similar to a mitochondrialcomplex I intermediate-associated protein; fluconazole-downregulated
orf19.401	1.96527	0.000779	CAL0005536	TCP1	Protein similar to &lt;i&gt;S. cerevisiae&lt;/i&gt; Tcp1p;transcription is induced in response to alpha pheromone inSpiderM medium
orf19.3168	1.96363	0.00121375	CAL0002371	RPN8	Predicted ORF in Assemblies 19, 20 and 21;transcription is regulated by Mig1p; regulated by Gcn2pand Gcn4p
orf19.517	1.96336	0.000289	CAL0000086	HAP31	Protein described as a transcription factor thatregulates CYC1; transcriptionally regulated by iron;expression greater in high iron
orf19.5246	1.96223	0.0335832	CAL0003559		Predicted ORF in Assemblies 19, 20 and 21
orf19.4622	1.9619	0.000606	CAL0003637		Predicted ORF in Assemblies 19, 20 and 21
orf19.5406	1.95873	0.00374432	CAL0005162		Predicted ORF in Assemblies 19, 20 and 21
orf19.5665	1.95833	0.000222	CAL0000693		Predicted ORF in Assemblies 19, 20 and 21
orf19.2736	1.95605	0.000259	CAL0004217		Predicted ORF in Assemblies 19, 20 and 21;flucytosine induced
orf19.731	1.95458	0.000178	CAL0001800	EMP46	Protein similar to &lt;i&gt;S. cerevisiae&lt;/i&gt; Emp46p;transcription is induced in response to alpha pheromone inSpiderM medium
orf19.6112	1.95435	0.000407	CAL0005957	CTA2	Putative transcriptional activator, activatestranscription in 1-hybrid assay in S. cerevisiae;downregulated by Efg1p; member of a family of telomere-proximal genes
orf19.1161	1.95427	0.000626	CAL0002069	PLD1	Phospholipase D1; required for phosphatidic acidand for most diacylglycerol production; required for wild-type mouse virulence, but not rat oral virulence; mutantdefect in hyphal growth on solid substrates; similar to S.cerevisiae Spo14p
orf19.5746	1.95418	0.0077877	CAF0006872	ALA1	Alanyl-tRNA synthetase; translational regulationgenerates cytoplasmic and mitochondrial forms; regulatedby Gcn4p; repressed upon amino acid starvation (3-AT);translation-related genes downregulated upon phagocytosisby murine macrophage
orf19.4781	1.95347	0.00699533	CAL0004583	GRP1	Protein similar to dihydroflavonol-4-reductases
orf19.1536	1.95144	0.00169992	CAL0005476		Predicted ORF in Assemblies 19, 20 and 21
orf19.5012	1.9502	0.00226472	CAL0001592		Predicted ORF in Assemblies 19, 20 and 21;possibly spurious ORF (Annotation Working Groupprediction)
orf19.7646	0.548902	0.000858	CAL0000888		Predicted ORF in Assemblies 19, 20 and 21
orf19.5334	0.547998	0.0225203	CAL0004295		Predicted ORF in Assemblies 19, 20 and 21;transcription regulated upon yeast-hyphal switch
orf19.1281	0.547814	0.000674	CAL0003058		Predicted ORF in Assemblies 19, 20 and 21
orf19.3942	0.546964	0.00276578	CAF0007000	RPL43A	Downregulated in the presence of human wholeblood or polymorphonuclear (PMN) cells; shows colonymorphology-related gene regulation by Ssn6p
orf19.4048	0.546331	0.000286	CAL0004818	DES1	Putative delta-4 sphingolipid desaturase
orf19.1952	0.545042	0.000243	CAL0002598		Protein not essential for viability
orf19.6591	0.544851	0.000339	CAL0003330		Predicted ORF in Assemblies 19, 20 and 21
orf19.4377	0.544215	0.000829	CAL0001119	KRE1	Predicted GPI-anchor, role in 1,6-beta-D-glucanbiosynthesis; production in S. cerevisiae increases glucancontent and complements killer toxin sensitivity of kre1mutant; possible N-linked glycosylation at Asn109;caspofungin induced
orf19.4499	0.543969	0.00479405	CAL0002049	RIM2	Protein similar to &lt;i&gt;S. cerevisiae&lt;/i&gt; Rim2p;induced in response to alpha pheromone in SpiderM medium
orf19.1250	0.543461	0.000478	CAL0002944		Predicted ORF in Assemblies 19, 20 and 21
orf19.7281	0.543246	0.000664	CAL0003985		Predicted ORF in Assemblies 19, 20 and 21
orf19.6469	0.542939	0.00161774	CAL0002266		Predicted ORF in Assemblies 19, 20 and 21
orf19.5675	0.542737	0.000932	CAL0000717		Predicted ORF in Assemblies 19, 20 and 21
orf19.3568	0.542555	0.0016336	CAL0005954	RXT3	Predicted ORF in Assemblies 19, 20 and 21
orf19.3990	0.541288	0.00172134	CAL0003169		Predicted ORF in Assemblies 19, 20 and 21
orf19.7503	0.541196	0.000294	CAL0006353		Predicted ORF in Assemblies 19, 20 and 21
orf19.1471	0.540362	0.000259	CAL0004689	COX4	Protein described as subunit IV of cytochrome coxidase; transcription is regulated by Mig1p;macrophage/pseudohyphal-induced gene; macrophage-inducedprotein; repressed by nitric oxide: intron in 5'-UTR
orf19.2125.1	0.539559	0.00450713	CAL0005305		Predicted ORF in Assemblies 19, 20 and 21
orf19.5651	0.538986	0.000436	CAL0000662		Predicted ORF in Assemblies 19, 20 and 21
orf19.5856	0.537815	0.00766685	CAL0002382		Predicted ORF in Assemblies 19, 20 and 21;possibly spurious ORF (Annotation Working Groupprediction)
orf19.4738	0.5377	0.00501352	CAL0004434		Predicted ORF in Assemblies 19, 20 and 21
orf19.1289	0.537314	0.000899	CAL0003066	SCT1	Putative glycerol-3-phosphate O-acyltransferase;fungal-specific (no human or murine homolog)
orf19.1927	0.537264	0.000691	CAL0002542	SNM1	Protein described as similar to RNase MRP RNAbinding protein; ciclopirox olamine induced
orf19.2164	0.536606	0.00235618	CAL0005390		Transcription is a-specific, alpha-factor induced; merged with orf19.2219 in Assembly 20
orf19.6653	0.535877	0.00105148	CAL0004060		Predicted ORF in Assemblies 19, 20 and 21
orf19.7558	0.535642	0.000383	CAL0000099	YTA6	Protein similar to S. cerevisiae Yta6p ATPase;transposon mutation affects filamentous growth
orf19.1253	0.534828	0.000304	CAL0002952		Predicted ORF in Assemblies 19, 20 and 21
orf19.4688	0.534542	0.000335	CAL0003828	DAG7	Predicted ORF in Assemblies 19, 20 and 21; a-specific transcription; alpha-factor induced
orf19.7107	0.532839	0.000326	CAL0002809		Predicted ORF in Assemblies 19, 20 and 21
orf19.4160	0.532293	0.00237789	CAL0005771		Predicted ORF in Assemblies 19, 20 and 21
orf19.6371	0.531831	0.00131604	CAL0001376		Predicted ORF in Assemblies 19, 20 and 21
orf19.1720	0.531047	0.000231	CAL0000801		Predicted ORF in Assemblies 19, 20 and 21
orf19.4602	0.529899	0.000228	CAL0003583	MDH1-1	Predicted malate dehydrogenase; macrophage-induced protein
orf19.4464	0.528939	0.00192137	CAL0001912	SEN15	Similar to delta subunit of tRNA splicingendonuclease; increased transcription is observed uponfluphenazine treatment
orf19.5133	0.528808	0.00157272	CAL0002550		Predicted zinc-finger protein of unknownfunction
orf19.7581	0.527324	0.00188148	CAL0000205		Predicted ORF in Assemblies 19, 20 and 21
orf19.5439	0.526888	0.00153301	CAL0005239		Predicted ORF in Assemblies 19, 20 and 21
orf19.920	0.526859	0.000494	CAL0003625	RMT2	Minor protein arginine methyltransferases (PRMT)involved in methylation of arginine residues
orf19.5510	0.526614	0.000231	CAL0006086		Predicted ORF in Assemblies 19, 20 and 21
orf19.1083	0.525453	0.000988	CAL0001251		Predicted ORF in Assemblies 19, 20 and 21;macrophage-induced gene; possibly spurious ORF (AnnotationWorking Group prediction)
orf19.5867	0.524592	0.000265	CAL0002412	WSC1	Protein described as a cell wall component;increased mRNA abundance observed in cyr1 homozygous nullmutant (yeast-form or hyphal cells)
orf19.6601.1	0.524483	0.000245	CAL0003917		Predicted ORF in Assemblies 19, 20 and 21;possibly spurious ORF (Annotation Working Groupprediction)
orf19.227	0.524392	0.000327	CAL0003929	COX7	Predicted ORF in Assemblies 19, 20 and 21;flucytosine induced; repressed by nitric oxide
orf19.7410	0.524277	0.000316	CAL0005453		Protein not essential for viability
orf19.5864	0.524272	0.00230787	CAL0002407	URK1	Protein described as similar to uridine kinase;transcription is downregulated in response to treatmentwith ciclopirox olamine
orf19.3585	0.523275	0.000491	CAL0006000		Predicted ORF in Assemblies 19, 20 and 21;regulated by Gcn4p; repressed in response to amino acidstarvation (3-aminotriazole treatment)
orf19.3720	0.523039	0.000465	CAL0001131		Predicted ORF in Assemblies 19, 20 and 21
orf19.6782	0.522712	0.00149439	CAL0004981		Predicted ORF in Assemblies 19, 20 and 21
orf19.166	0.5225	0.00173553	CAL0003189		Predicted zinc-finger protein of unknownfunction; has similarity to S. cerevisiae Asg1p, which isa proposed transcription factor of the Gal4p family
orf19.1812	0.522365	0.00181649	CAL0001599		Predicted ORF from Assembly 19; merged with orf19.3071 in Assembly 20
orf19.695	0.522217	0.0047359	CAL0001166	RGS2	Protein of RGS superfamily; not essential forviability; possibly spurious ORF (Annotation Working Groupprediction)
orf19.2143	0.522214	0.00150409	CAL0005345		Predicted ORF in Assemblies 19, 20 and 21
orf19.1492	0.521946	0.00241413	CAL0004777		Predicted ORF in Assemblies 19, 20 and 21
orf19.1375	0.521725	0.000235	CAL0003911	LEU42	Putative alpha-isopropylmalate synthase; fungal-specific (no human or murine homolog); upregulated in thepresence of human whole blood or polymorphonuclear (PMN)cells; regulated by Gcn2p and Gcn4p
orf19.1199	0.521661	0.000226	CAL0002164	NOP5	Protein similar to S. cerevisiae Nop5p proteinof small nucleolar ribonucleoprotein complex; transposonmutation affects filamentous growth;macrophage/pseudohyphal-induced
orf19.3047	0.521126	0.000385	CAL0001414		Predicted ORF in Assemblies 19, 20 and 21
orf19.6920	0.52072	0.00039	CAL0000195		Predicted ORF in Assemblies 19, 20 and 21;induced upon biofilm formation; possibly spurious ORF(Annotation Working Group prediction)
orf19.5767	0.519905	0.000547	CAL0001495		Predicted ORF in Assemblies 19, 20 and 21
orf19.6139	0.5199	0.00028	CAL0006013	FRE7	Protein similar to ferric reductase Fre10p;transcription is downregulated in response to treatmentwith ciclopirox olamine, amphotericin B, 17-beta-estradiol; alkaline upregulated; transcriptionally inducedby interaction with macrophage
orf19.1306	0.519401	0.00460044	CAL0003707		Predicted ORF in Assemblies 19, 20 and 21
orf19.968	0.519063	0.000166	CAL0003749	PGA14	Putative GPI-anchored protein of unknownfunction; induced during cell wall regeneration; regulatedby Ssn6p
orf19.2917	0.518922	0.000781	CAL0005973		Predicted ORF in Assemblies 19, 20 and 21
orf19.2073	0.51859	0.000774	CAL0004494		Predicted ORF in Assemblies 19, 20 and 21
orf19.512	0.518025	0.00358774	CAL0000078		Predicted ORF in Assemblies 19, 20 and 21;essential; S. cerevisiae ortholog is essential
orf19.7369	0.517777	0.0023054	CAL0004728		Predicted ORF in Assemblies 19, 20 and 21
orf19.1837	0.517621	0.000258	CAL0001658	TBP1	Transcription initiation factor; binds TATA boxsequence, and binding does not require TFIIA; caspofunginrepressed; functional homolog of S. cerevisiae and humanTATA-binding proteins
orf19.488	0.517098	0.00161192	CAL0005845	MEX67	Nuclear export protein; has NTF2-like domain;interacts with Mtr2p via the NTF2-like domain
orf19.6751	0.516758	0.0011165	CAL0004884		Predicted ORF in Assemblies 19, 20 and 21
orf19.1030	0.516291	0.00036	CAL0001110		Predicted ORF in Assemblies 19, 20 and 21
orf19.6665	0.516191	0.000673	CAL0004089		Predicted ORF in Assemblies 19, 20 and 21
orf19.1201	0.516075	0.000383	CAL0002761		Predicted ORF in Assemblies 19, 20 and 21
orf19.168	0.515283	0.000759	CAL0003194		Predicted ORF in Assemblies 19, 20 and 21
orf19.2110	0.515076	0.00472665	CAL0005273		Predicted ORF in Assemblies 19, 20 and 21
orf19.7011	0.514909	0.00150763	CAL0001929		Predicted ORF in Assemblies 19, 20 and 21
orf19.7603	0.514687	0.000769	CAL0000795		Predicted ORF in Assemblies 19, 20 and 21
orf19.3098	0.514586	0.000528	CAL0001532		Predicted ORF in Assemblies 19, 20 and 21
orf19.5213.2	0.513322	0.000247	CAF0007033	COX8	ORF Predicted by Annotation Working Group;flucytosine induced; caspofungin repressed
orf19.2199	0.512696	0.0017188	CAL0005485	PHO86	Predicted ORF in Assemblies 19, 20 and 21;possibly adherence-induced
orf19.2715	0.51196	0.0116403	CAL0004186	RPC53	Predicted ORF in Assemblies 19, 20 and 21
orf19.4905	0.511523	0.00756039	CAL0006202		Predicted ORF in Assemblies 19, 20 and 21;decreased expression observed in an ssr1 homozygous nullmutant
orf19.1093	0.511434	0.000277	CAL0001280	FLO8	Transcription factor; required for wild-typehyphal formation; regulates hyphal gene expression;required for virulence in mouse systemic infection; bindsEfg1p; has LUFS domain; functional homolog of S.cerevisiae Flo8p
orf19.2368	0.510616	0.00278386	CAL0000772		Predicted ORF in Assemblies 19, 20 and 21
orf19.3826	0.510478	0.00179028	CAL0001994		Predicted ORF in Assemblies 19, 20 and 21; Plc1p-regulated
orf19.1907	0.510366	0.000608	CAL0002503	EMC9	Protein not essential for viability, inducedduring the mating process
orf19.3833	0.509235	0.00225852	CAL0002026		Putative DNA-binding transcription factor;decreased transcription is observed upon fluphenazinetreatment
orf19.962	0.508786	0.000431	CAL0003742		Predicted ORF in Assemblies 19, 20 and 21
orf19.1753	0.508349	0.0010883	CAL0000869	PUS7	Protein similar to S. cerevisiae tRNAmodification protein; induced upon biofilm formation
orf19.5069	0.507778	0.00034	CAL0001727		Predicted ORF in Assemblies 19, 20 and 21
orf19.3276	0.507618	0.000416	CAL0003392	PWP2	Predicted ORF in Assemblies 19, 20 and 21;downregulated during core stress response
orf19.6152	0.506531	0.00456525	CAL0006044		Predicted ORF in Assemblies 19, 20 and 21
orf19.2631	0.506484	0.00119293	CAL0003427		Predicted ORF in Assemblies 19, 20 and 21
orf19.1466	0.505872	0.000171	CAL0004656		Predicted ORF in Assemblies 19, 20 and 21
orf19.6865	0.504537	0.00213654	CAL0005834		Predicted ORF from Assembly 19; merged with orf19.2631 in Assembly 20
orf19.7343	0.504153	0.00317148	CAL0004633		Predicted ORF in Assemblies 19, 20 and 21
orf19.3004	0.503883	0.000401	CAL0001328		Predicted ORF in Assemblies 19, 20 and 21
orf19.3399	0.503331	0.000387	CAL0004226		Predicted ORF in Assemblies 19, 20 and 21
orf19.1357	0.502874	0.0162573	CAL0003863	FCY21	High affinity, high capacity, hypoxanthine-adenine-guanine-cytosine/ H+ symporter; purine-cytosinepermease of pyrimidine salvage; similar to S. cerevisiaeFcy2p
orf19.444	0.501849	0.00310554	CAL0005693		Predicted ORF in Assemblies 19, 20 and 21
orf19.3202	0.500402	0.00165722	CAL0003188		Protein not essential for viability
orf19.4203	0.50023	0.00604834	CAL0000057		Predicted ORF in Assemblies 19, 20 and 21
orf19.7394	0.499928	0.000222	CAL0004837	GDA1	Golgi membrane GDPase, required for wild-type O-mannosylation, not N-glycosylation; required for wild-typehyphal induction, cell wall, and cell surface charge; notrequired for HeLa cell adherence; functional homolog of S.cerevisiae Gda1p
orf19.2165	0.499523	0.00173154	CAL0005392		Predicted ORF in Assemblies 19, 20 and 21;induced by nitric oxide
orf19.5318	0.499332	0.000344	CAL0004266	RAD1	Transcription is regulated by Nrg1p; macrophage-induced gene
orf19.4784	0.498942	0.00865793	CAL0004587	CRP1	Copper transporter of the plasma membrane; P1-type ATPase (CPx type); mediates copper resistance;similar to proteins of Menkes and Wilson disease; copper-induced; suppresses copper sensitivity of an S. cerevisiaecup1 null mutant
orf19.2636	0.498384	0.000142	CAL0003437		Predicted ORF from Assembly 19; merged with orf19.6654 in Assembly 20
orf19.3153	0.496793	0.000158	CAL0002340	MSS4	Phosphatidylinositol-4-phosphate 5-kinase;activity induced by phosphatidic acid (Pld1p product);associated with hyphal growth under some, not all,conditions; functional homolog of S. cerevisiae Mss4p;macrophage/pseudohyphal-repressed
orf19.6416	0.496412	0.000272	CAL0002139		Predicted ORF in Assemblies 19, 20 and 21
orf19.4824	0.49471	0.000173	CAL0005335		Predicted ORF in Assemblies 19, 20 and 21
orf19.147	0.494233	0.00320684	CAL0003123		Predicted ORF in Assemblies 19, 20 and 21;induced in core caspofungin response
orf19.7021	0.493958	0.000961	CAL0001970	GPH1	Putative glycogen phosphorylase; gene regulatedby Ssk1p, Mig1p, and Tup1p; fluconazole-induced; localizesto cell surface of hyphal cells, but not yeast-form cells;S. cerevisiae Gph1p is a stress-regulated protein ofglycogen metabolism
orf19.2090	0.493231	0.0002	CAL0004556		Predicted ORF in Assemblies 19, 20 and 21
orf19.1915	0.493214	0.000145	CAL0002520	MPP10	Predicted ORF in Assemblies 19, 20 and 21;downregulated in core stress response
orf19.243	0.493018	0.0013037	CAL0003979	OXR1	Predicted ORF in Assemblies 19, 20 and 21
orf19.3485	0.492891	0.000247	CAL0005092		Predicted ORF from Assembly 19; merged with orf19.6283 in Assembly 20
orf19.4678	0.492454	0.000619	CAL0003795		Predicted ORF in Assemblies 19, 20 and 21
orf19.3143	0.492263	0.000173	CAL0002313		Predicted ORF from Assembly 19; merged with orf19.2866 in Assembly 20
orf19.7387	0.492256	0.00203105	CAL0004812		Predicted ORF in Assemblies 19, 20 and 21
orf19.5607	0.491456	0.000136	CAL0000537		Predicted ORF in Assemblies 19, 20 and 21
orf19.6283	0.491037	0.000555	CAL0000591		Predicted ORF in Assemblies 19, 20 and 21
orf19.1168	0.48994	0.000281	CAL0002075		Predicted zinc-finger protein of unknownfunction
orf19.4219	0.489013	0.00155007	CAL0000102	RIX7	Protein similar to &lt;i&gt;S. cerevisiae&lt;/i&gt; Rix7pwhich is a putative ATPase of the AAA family required forribosomal subunit export from the nucleus; mutationimpairs hyphal growth and biofilm formation
orf19.1467	0.488705	0.000132	CAL0004657	COX13	Predicted ORF in Assemblies 19, 20 and 21;flucytosine induced; repressed by nitric oxide
orf19.5814	0.48839	0.00721639	CAL0002275		Predicted ORF in Assemblies 19, 20 and 21;possibly spurious ORF (Annotation Working Groupprediction)
orf19.6689	0.488353	0.000763	CAL0004142	ARG4	Argininosuccinate lyase, catalyzes the finalstep in the arginine biosynthesis pathway; alkalinedownregulated
orf19.7445	0.487461	0.000993	CAL0005550		Predicted ORF in Assemblies 19, 20 and 21
orf19.2996	0.487311	0.00313389	CAL0006159		Predicted ORF in Assemblies 19, 20 and 21
orf19.3626	0.487193	0.000821	CAL0000351		Predicted ORF in Assemblies 19, 20 and 21
orf19.429	0.487124	0.00114714	CAL0005626		Predicted ORF in Assemblies 19, 20 and 21;repressed by nitric oxide
orf19.4349.6	0.486176	0.000121	CAL0001022		Predicted ORF in Assemblies 19, 20 and 21
orf19.1686	0.486129	0.000193	CAL0000152		Predicted ORF in Assemblies 19, 20 and 21
orf19.4659	0.485906	0.000341	CAL0003731		Predicted ORF in Assemblies 19, 20 and 21
orf19.4628	0.485772	0.000139	CAL0003648		Predicted ORF in Assemblies 19, 20 and 21
orf19.391	0.485572	0.000122	CAL0004944	UPC2	Transcription factor involved in regulation ofergosterol biosynthetic genes and sterol uptake; bindsERG2 promoter; has Zn(2)-Cys(6) binuclear cluster; similarto S. cerevisiae Upc2p; fluconazole-induced;macrophage/pseudohyphal-repressed
orf19.2655	0.484198	0.000718	CAL0003474	BUB3	Protein similar to S. cerevisiae Bub3p, which isa kinetochore checkpoint component; induced underhydroxyurea treatment
orf19.6652	0.483895	0.000256	CAL0004058	DBP8	Protein likely to be essential for growth, basedon insertional mutagenesis; similar to S. cerevisiaeDbp8p, which is an ATP-dependent helicase involved in rRNAprocessing; oxidative stress-repressed via Cap1p;flucytosine repressed
orf19.6355	0.48355	0.0148778	CAL0001341		Predicted ORF in Assemblies 19, 20 and 21
orf19.6706	0.483223	0.000155	CAL0004710	GYP7	Predicted ORF in Assemblies 19, 20 and 21;similar to S. cerevisiae Gyp7p (GTPase-activating proteinfor Ypt1p); caspofungin-induced
orf19.2393	0.483199	0.000169	CAL0000836		Putative transcription factor with zinc fingerDNA-binding motif
orf19.1121	0.482839	0.000341	CAL0001913		Predicted ORF in Assemblies 19, 20 and 21
orf19.6710	0.4821	0.000188	CAL0004741		Predicted ORF in Assemblies 19, 20 and 21;decreased expression observed in an ssr1 homozygous nullmutant
orf19.7215	0.481096	0.00015	CAF0007117		ORF Predicted by Annotation Working Group
orf19.225	0.480439	0.000365	CAL0003924		Predicted ORF in Assemblies 19, 20 and 21
orf19.2419	0.48008	0.000231	CAL0001484		Predicted ORF in Assemblies 19, 20 and 21
orf19.2436	0.479441	0.00058	CAL0001525		Predicted ORF in Assemblies 19, 20 and 21
orf19.5438	0.479349	0.000153	CAL0005238		Predicted ORF in Assemblies 19, 20 and 21
orf19.3250	0.478382	0.000652	CAL0003333		Predicted ORF in Assemblies 19, 20 and 21
orf19.3428	0.476373	0.00224181	CAL0004935		Predicted ORF in Assemblies 19, 20 and 21
orf19.5636	0.476232	0.000145	CAL0000618	RBT5	GPI-anchored cell wall protein; has CRoW motif,not required for filamentous growth; expression isregulated by Rfg1p, Rim101p; repressed by Sfu1p, Hog1p,Tup1p; induced by serum, iron, alkaline pH, ketoconazole,or ciclopirox olamine
orf19.2488	0.47577	8.81e-05	CAL0001638	FAL1	Predicted ORF in Assemblies 19, 20 and 21
orf19.3414	0.475169	0.000145	CAL0004898		Predicted ORF in Assemblies 19, 20 and 21
orf19.4963	0.474685	0.000185	CAL0006361		Predicted ORF in Assemblies 19, 20 and 21
orf19.1433	0.473191	0.00241576	CAL0004553		Predicted ORF in Assemblies 19, 20 and 21; showscolony morphology-related gene regulation by Ssn6p
orf19.5117	0.472959	0.000135	CAL0002511	OLE1	Fatty acid desaturase (stearoyl-CoA desaturase),essential protein involved in oleic acid synthesis;required for aerobic hyphal growth and chlamydosporeformation; subject to hypoxic regulation; fluconazole-induced; caspofungin repressed
orf19.7619	0.472908	0.00085	CAL0000826		Predicted ORF in Assemblies 19, 20 and 21
orf19.118	0.472385	0.000224	CAL0003001	FAD2	Delta-12 fatty acid desaturase, involved inproduction of linoleic acid, which is a major component ofmembranes
orf19.4849	0.471921	0.000468	CAL0005386		Predicted ORF in Assemblies 19, 20 and 21
orf19.3970	0.471376	0.000191	CAL0003091		Predicted ORF in Assemblies 19, 20 and 21
orf19.6451	0.47125	0.000115	CAL0002226		Predicted ORF from Assembly 19; similar to a region of the Tca2 (pCal) retrotransposon, which is present in strain hOG1042 as 50 to 100 copies of a linear dsDNA; removed from Assembly 20
orf19.2851	0.470911	0.0178431	CAL0005152		Predicted ORF in Assemblies 19, 20 and 21
orf19.4133	0.470291	0.000121	CAL0005669		Predicted ORF in Assemblies 19, 20 and 21
orf19.2156	0.470169	8.69e-05	CAL0005371	NAG1	Glucosamine-6-phosphate deaminase; enzyme of N-acetylglucosamine utilization; required for wild-typehyphal growth and mouse virulence; converts glucosamine 6-P to fructose 6-P; reaction is reversible in vitro; geneis GlcNAc-induced
orf19.5197	0.469808	0.000117	CAL0002735	APE2	Protein repressed during the mating process;Hog1p-induced
orf19.7422	0.469583	0.000249	CAL0005488		Predicted ORF in Assemblies 19, 20 and 21
orf19.4630	0.469471	9.14e-05	CAL0003663	CPA1	Alkaline downregulated
orf19.2487	0.46946	0.000422	CAL0001637		Predicted ORF in Assemblies 19, 20 and 21
orf19.5824	0.469441	0.000569	CAL0002301		Predicted ORF in Assemblies 19, 20 and 21
orf19.4950	0.469081	0.000132	CAL0006326	AKR1	Ankyrin-repeat protein; increased transcriptionis observed upon fluphenazine treatment
orf19.7393	0.468756	0.000204	CAL0004835		Predicted ORF in Assemblies 19, 20 and 21
orf19.7223	0.467029	0.000442	CAL0003802		Predicted ORF in Assemblies 19, 20 and 21
orf19.4082	0.466098	0.000149	CAL0004933	DDR48	Immunogenic stress-associated protein; regulatedby filamentous growth pathways; induced by benomyl,caspofungin, or in azole-resistant strain; Hog1p, alkalinedownregulated; similar to S. cerevisiae Ddr48p(ATP/GTPase, role in DNA repair)
orf19.2384	0.465941	0.00168875	CAL0000811		Predicted ORF in Assemblies 19, 20 and 21
orf19.6688	0.465558	0.00501764	CAL0004140		Decreased transcription is observed upon benomyltreatment or in an azole-resistant strain thatoverexpresses MDR1
orf19.5961	0.465153	0.000536	CAL0003397		Predicted ORF in Assemblies 19, 20 and 21;described as similar to S. cerevisiae Nas6p proteasomecomponent; induced upon adherence to polystyrene;regulated by Gcn2p and Gcn4p
orf19.2404	0.464036	0.00038	CAL0001450		Predicted ORF in Assemblies 19, 20 and 21
orf19.68.2	0.463963	0.000823	CAF0006887		ORF Predicted by Annotation Working Group
orf19.6662	0.463945	8.84e-05	CAL0004083		Predicted ORF in Assemblies 19, 20 and 21
orf19.1047	0.463901	0.000936	CAL0001157	ERB1	Predicted ORF in Assemblies 19, 20 and 21;hyphal repressed; macrophage repressed
orf19.6817	0.463504	0.000166	CAL0005662	FCR1	Putative zinc cluster transcription factor;negative regulator of fluconazole, ketoconazole, brefeldinA resistance; transposon mutation affects filamentousgrowth; partially suppresses S. cerevisiae pdr1 pdr3mutant fluconazole sensitivity
orf19.7200	0.461849	0.0011818	CAL0003734		Predicted ORF in Assemblies 19, 20 and 21;possibly spurious ORF (Annotation Working Groupprediction)
orf19.28	0.461519	0.000342	CAL0000526		Predicted ORF in Assemblies 19, 20 and 21
orf19.3415	0.461261	9.84e-05	CAF0006985	RPL32	Predicted ribosomal protein
orf19.3422	0.460222	0.000211	CAL0004921	FMP27	Predicted ORF in Assemblies 19, 20 and 21;fungal-specific (no human or murine homolog)
orf19.5704	0.460154	0.000925	CAL0001357		Predicted ORF in Assemblies 19, 20 and 21
orf19.1826	0.459901	0.00029	CAL0001630	MDM34	Putative transcription factor with zinc fingerDNA-binding motif; macrophage-downregulated gene
orf19.6736	0.459743	0.000207	CAL0004833		Predicted ORF in Assemblies 19, 20 and 21
orf19.25	0.459602	0.000283	CAL0000523		Predicted ORF in Assemblies 19, 20 and 21
orf19.254	0.459489	0.000138	CAL0004007		Predicted ORF in Assemblies 19, 20 and 21; Hog1p-downregulated
orf19.2458	0.459231	0.000146	CAL0001563		Putative transcription factor with zinc fingerDNA-binding motif
orf19.5835	0.45829	0.000173	CAL0002329		Predicted ORF in Assemblies 19, 20 and 21
orf19.1229	0.45769	0.000166	CAL0002842		Predicted ORF in Assemblies 19, 20 and 21
orf19.6090	0.457672	0.000193	CAL0005232		Predicted ORF in Assemblies 19, 20 and 21;repressed by nitric oxide
orf19.4379	0.456802	0.000236	CAL0001123	PRP13	Predicted ORF in Assemblies 19, 20 and 21;fungal-specific (no human or murine homolog)
orf19.6731	0.456498	8.83e-05	CAF0007086		ORF Predicted by Annotation Working Group
orf19.3540	0.455833	0.000858	CAL0005900	MAK5	Predicted ORF in Assemblies 19, 20 and 21;oxidative stress-repressed via Cap1p
orf19.7379	0.455387	0.000369	CAL0004773	FAA2	Predicted acyl CoA synthetase; expression isregulated upon white-opaque switching
orf19.5229	0.454883	0.000344	CAL0003527		Predicted ORF in Assemblies 19, 20 and 21
orf19.2966	0.453177	6.81e-05	CAL0006082		Predicted ORF in Assemblies 19, 20 and 21
orf19.3012	0.452878	0.000364	CAL0001342	ARO80	Protein not essential for viability; similar toS. cerevisiae Aro80p, which is a transcriptional activatorrequired for aromatic amino acid catabolism
orf19.4120	0.452273	0.000517	CAL0005623	LAS1	Predicted ORF in Assemblies 19, 20 and 21;macrophage-induced gene
orf19.6175	0.452193	8.22e-05	CAL0006097		Predicted ORF in Assemblies 19, 20 and 21
orf19.5617	0.449344	0.00280835	CAL0000566		Predicted ORF in Assemblies 19, 20 and 21
orf19.3515	0.449187	7.37e-05	CAL0005808		Predicted ORF in Assemblies 19, 20 and 21
orf19.4225	0.449166	0.000351	CAL0000141		Predicted zinc-finger protein of unknownfunction; has similarity to S. cerevisiae Leu3p, which isa transcription factor involved in the regulation ofbranched-chain amino acid biosynthesis genes; alkalineupregulated
orf19.3369	0.449024	0.000606	CAL0004179	MOH1	Protein similar to &lt;i&gt;S. cerevisiae&lt;/i&gt; Moh1p;transcription is induced in response to alpha pheromone inSpiderM medium
orf19.5596	0.447333	0.000338	CAL0006290		Predicted ORF in Assemblies 19, 20 and 21
orf19.5550	0.445424	0.000401	CAL0006176		Predicted ORF in Assemblies 19, 20 and 21
orf19.4188	0.444767	0.000264	CAL0005859	NMD5	Protein not essential for viability; similar toS. cerevisiae Nmd5p, which is involved in protein-nucleusimport; downregulated during core stress response
orf19.3476	0.444092	6.07e-05	CAL0005063		Predicted ORF in Assemblies 19, 20 and 21
orf19.4721	0.443813	0.000342	CAL0004394		Predicted ORF in Assemblies 19, 20 and 21;possibly spurious ORF (Annotation Working Groupprediction)
orf19.4381	0.443684	0.00035	CAL0001140	VTC3	Putative polyphosphate synthetase; downregulatedin core caspofungin response; Hog1p-induced; transcriptionis opaque-specific; fungal-specific (no human or murinehomolog)
orf19.5039	0.443399	8.34e-05	CAL0001650		Predicted ORF in Assemblies 19, 20 and 21
orf19.6440	0.44254	0.000321	CAL0002208		Predicted ORF in Assemblies 19, 20 and 21
orf19.4928	0.442136	0.000294	CAL0006259		Predicted ORF in Assemblies 19, 20 and 21
orf19.4268	0.44126	0.000319	CAL0000293		Predicted ORF in Assemblies 19, 20 and 21;downregulated in core stress response
orf19.5960	0.440207	5.52e-05	CAL0003396		Predicted ORF in Assemblies 19, 20 and 21
orf19.3466	0.439952	0.000357	CAL0005038		Predicted ORF in Assemblies 19, 20 and 21;decreased transcription is observed upon fluphenazinetreatment or in an azole-resistant strain thatoverexpresses CDR1 and CDR2
orf19.4775	0.439831	0.000529	CAL0004552	CTA8	Predicted ORF in Assemblies 19, 20 and 21;activates transcription in 1-hybrid assay in S.cerevisiae
orf19.2018	0.439361	0.00180738	CAL0004339		Predicted ORF in Assemblies 19, 20 and 21
orf19.3040	0.438896	0.00039	CAL0001403	EHT1	Protein similar to &lt;i&gt;S. cerevisiae&lt;/i&gt; Eht1p;transcription is induced in response to alpha pheromone inSpiderM medium
orf19.7460	0.438451	0.000369	CAL0005614		Predicted ORF in Assemblies 19, 20 and 21
orf19.5530	0.437532	0.000222	CAL0006136	NAB3	Predicted ORF in Assemblies 19, 20 and 21;flucytosine repressed
orf19.3331	0.437091	9.57e-05	CAL0004112	ABC1	Protein described as ubiquinol-cytochrome-creductase; induced upon adherence to polystyrene
orf19.1010	0.43668	6.76e-05	CAL0001038	MNT3	Protein with similarity to mannosyltransferases;transcription is elevated in cyr1, chk1, nik1, and sln1homozygous null mutants; fungal-specific (no human ormurine homolog)
orf19.5213.1	0.436241	7.46e-05	CAL0003502		Predicted ORF in Assemblies 19, 20 and 21
orf19.1966	0.435646	0.000142	CAL0002637		Predicted ORF in Assemblies 19, 20 and 21
orf19.6908	0.435171	0.000306	CAL0000131		Predicted ORF in Assemblies 19, 20 and 21
orf19.6418	0.435019	0.00027	CAL0002143		Predicted ORF in Assemblies 19, 20 and 21
orf19.2175	0.434288	6.08e-05	CAL0005416		Predicted ORF in Assemblies 19, 20 and 21;induced by nitric oxide
orf19.551	0.434261	0.00152978	CAL0000230		Predicted ORF in Assemblies 19, 20 and 21
orf19.3574	0.434165	0.000352	CAL0005975		Predicted ORF in Assemblies 19, 20 and 21
orf19.2998	0.433859	0.000126	CAL0006160		Predicted ORF in Assemblies 19, 20 and 21
orf19.3553	0.433343	9.3e-05	CAL0005924		Predicted ORF in Assemblies 19, 20 and 21
orf19.1180	0.432996	0.00336775	CAL0002124		Predicted ORF in Assemblies 19, 20 and 21
orf19.6989	0.432499	0.000535	CAL0000405		Predicted ORF in Assemblies 19, 20 and 21
orf19.3130	0.431998	0.000151	CAL0002280		Predicted ORF in Assemblies 19, 20 and 21
orf19.1007	0.431986	5.51e-05	CAL0001024		Putative transcription factor with bZIP DNA-binding motif
orf19.2842	0.431975	9.58e-05	CAL0005136	GZF3	Predicted ORF in Assemblies 19, 20 and 21;oxidative stress-induced via Cap1p
orf19.1082.1	0.431423	6.64e-05	CAF0006920		ORF Predicted by Annotation Working Group
orf19.909	0.430951	6.44e-05	CAL0003582	STP4	Putative transcription factor with zinc fingerDNA-binding motif; induced in core caspofungin response;shows colony morphology-related gene regulation by Ssn6p;induced by 17-beta-estradiol, ethynyl estradiol
orf19.6259	0.430758	9.78e-05	CAL0000517		Predicted ORF in Assemblies 19, 20 and 21
orf19.3171	0.430758	7.14e-05	CAL0002388	ACH1	Soluble protein in hyphae; similar to S.cerevisiae Ach1p, which is acetyl-coA hydrolase requiredfor acetate utilization; nonessential; antigenic in human;induced on polystyrene adherence; ketoconazole-induced; nohuman or murine homolog
orf19.1569	0.429924	0.000262	CAL0005569		Predicted ORF in Assemblies 19, 20 and 21;decreased expression observed in an ssr1 homozygous nullmutant
orf19.4363	0.429893	0.000565	CAL0001070	SGD1	Predicted ORF in Assemblies 19, 20 and 21;downregulated during core stress response; transcriptionis increased in populations of cells exposed tofluconazole over multiple generations
orf19.64	0.429677	0.000958	CAL0000630		Predicted ORF from Assembly 19; removed from Assembly 20
orf19.3016	0.429596	0.00015	CAL0001350		Predicted ORF in Assemblies 19, 20 and 21
orf19.7565	0.428687	0.00025	CAL0000134	GNP3	Putative high-affinity glutamine permease;fungal-specific (no human or murine homolog)
orf19.5521	0.428622	4.79e-05	CAL0006111	ISA1	Reported to have possible role in iron-sulfurcluster biogenesis or cytoplasm-to-mitochondrion irontransport; alkaline downregulated; transcriptionallyregulated by iron; expression greater in high iron
orf19.1575	0.428134	9.63e-05	CAL0005603	PRS1	Phosphoribosylpyrophosphate synthetase; enzymeof purine, pyrimidine, histidine, and tryptophanbiosynthesis; essential; flucytosine induced;macrophage/pseudohyphal-induced
orf19.7325	0.427988	7.95e-05	CAL0004577		Predicted ORF in Assemblies 19, 20 and 21
orf19.1959	0.42774	0.000216	CAL0002605		Predicted ORF in Assemblies 19, 20 and 21
orf19.6685	0.427739	0.000132	CAL0004135		Predicted ORF in Assemblies 19, 20 and 21
orf19.7488	0.427095	9.05e-05	CAL0005715		Predicted ORF in Assemblies 19, 20 and 21
orf19.6447	0.426843	0.000428	CAL0002216	ARF1	ADP-ribosylation factor, probable GTPaseinvolved in intracellular transport; one of several C.albicans ADP-ribosylation factors; N-myristoylprotein;substrate of Nmt1p
orf19.7566	0.426034	0.000288	CAL0000137		Predicted ORF in Assemblies 19, 20 and 21;alkaline upregulated by Rim101p; fungal-specific (no humanor murine homolog)
orf19.1852	0.425657	0.000226	CAL0001691		Predicted ORF in Assemblies 19, 20 and 21
orf19.6058	0.424154	5.03e-05	CAL0005149	GLO1	Predicted ORF in Assemblies 19, 20 and 21;oxidative stress-induced via Cap1p
orf19.6918	0.423924	0.00178454	CAL0000173		Predicted ORF in Assemblies 19, 20 and 21
orf19.414	0.421793	0.000428	CAL0005574		Predicted ORF in Assemblies 19, 20 and 21
orf19.3820	0.420372	7.46e-05	CAL0001980		Predicted ORF in Assemblies 19, 20 and 21
orf19.7131	0.419715	5.13e-05	CAL0002922		Predicted ORF in Assemblies 19, 20 and 21
orf19.4443	0.41968	0.0101174	CAL0001843	YPD1	Phosphohistidine intermediate protein in aphosphorelay signal transduction pathway; residue His69 isthe phosphoacceptor histidine; predicted to be soluble andcytosolic; functional homolog of S. cerevisiae Ypd1p
orf19.3679	0.417783	0.000334	CAL0000455		Predicted ORF in Assemblies 19, 20 and 21
orf19.6941	0.417479	5.41e-05	CAL0000264		Predicted ORF in Assemblies 19, 20 and 21
orf19.2538	0.416718	4.94e-05	CAL0002447		Predicted ORF in Assemblies 19, 20 and 21
orf19.5228	0.415895	5.64e-05	CAL0003526	RIB3	3,4-Dihydroxy-2-butanone 4-phosphate synthase;homodimeric enzyme of riboflavin biosynthesis; convertsribulose 5-phosphate to L-3,4-dihydroxy-2-butanone 4-phosphate; transcription regulated on yeast-hyphal switch,macrophage interaction
orf19.172	0.415819	0.000131	CAL0003206		Predicted ORF in Assemblies 19, 20 and 21
orf19.1954	0.415388	0.0001	CAL0002600	PUS4	Transcription is regulated by Nrg1p, Mig1p, andTup1p
orf19.6600	0.415173	0.000186	CAL0003916		Predicted ORF in Assemblies 19, 20 and 21
orf19.718	0.415065	0.000171	CAL0001746		Putative RNA polymerase I subunit
orf19.6608	0.415047	0.000181	CAL0003933		Predicted ORF in Assemblies 19, 20 and 21;downregulation correlates with clinical development offluconazole resistance
orf19.83	0.414699	0.000185	CAL0000680		Predicted ORF from Assembly 19; removed from Assembly 20
orf19.5622	0.413722	5.29e-05	CAL0000583	GLC3	Protein described as similar to 1,4-glucanbranching enzyme; fluconazole-induced; shows colonymorphology-related gene regulation by Ssn6p
orf19.2414	0.41366	7.46e-05	CAL0001475		Predicted ORF in Assemblies 19, 20 and 21
orf19.3781	0.413249	0.00062	CAL0001295		Predicted ORF in Assemblies 19, 20 and 21
orf19.1552	0.413244	0.000167	CAL0005525	CPR3	Protein described as a peptidyl-prolyl cis-transisomerase; macrophage-induced protein
orf19.398	0.413202	5.79e-05	CAL0004963		Predicted ORF in Assemblies 19, 20 and 21;possibly spurious ORF (Annotation Working Groupprediction)
orf19.5987	0.412823	0.00031	CAL0003457		Predicted ORF in Assemblies 19, 20 and 21
orf19.2575	0.412813	0.000336	CAL0002524		Predicted ORF in Assemblies 19, 20 and 21
orf19.3874	0.412793	0.000255	CAL0002152		Predicted ORF in Assemblies 19, 20 and 21
orf19.3133	0.41194	3.97e-05	CAL0002288	GUT2	Predicted ORF in Assemblies 19, 20 and 21; Plc1p-regulated
orf19.2392	0.411877	0.00147653	CAL0000834		Protein not essential for viability
orf19.4657	0.411713	0.000166	CAL0003729		Predicted ORF in Assemblies 19, 20 and 21
orf19.4143	0.411398	6.99e-05	CAL0005712		Predicted ORF in Assemblies 19, 20 and 21
orf19.4375	0.410814	0.000554	CAF0007010	RPS30	ORF Predicted by Annotation Working Group;putative 40S ribosomal protein S30; shows colonymorphology-related gene regulation by Ssn6p
orf19.7063	0.410777	6.5e-05	CAL0002111		Predicted ORF in Assemblies 19, 20 and 21
orf19.2515	0.410743	5.21e-05	CAL0002389		Predicted ORF in Assemblies 19, 20 and 21
orf19.866	0.408755	0.000249	CAL0002818	RAD32	Protein similar to S. cerevisiae protein withrole in nucleotide excision repair; down-regulationassociated with azole resistance
orf19.3931	0.408364	0.00303585	CAL0002928	SFC1	Alkaline upregulated
orf19.7398	0.408341	0.000932	CAF0007120	TSA1B	Putative peroxidase; orf19.7398.1 is contig-truncated fragment of gene identical to TSA1; Tsa1p andTsa1Bp role under oxidative/reductive stress, hyphal cellwall formation; in hyphal nucleus, cell wall; yeast-formnucleus, cytoplasm
orf19.3327	0.407416	0.000392	CAL0004099		Predicted ORF in Assemblies 19, 20 and 21
orf19.3609	0.407141	0.000224	CAL0000290		Predicted ORF in Assemblies 19, 20 and 21
orf19.801	0.407059	0.00116251	CAL0002606		Predicted ORF in Assemblies 19, 20 and 21
orf19.7366	0.407	8.3e-05	CAL0004722		Predicted ORF in Assemblies 19, 20 and 21
orf19.3646	0.406563	6.92e-05	CAL0000406	CTR1	Copper transporter; probably multimeric;transcribed if copper limited; induced by Mac1p,macrophage interaction, alkaline pH via Rim101p; 17-beta-estradiol downregulated; complements S. cerevisiae ctr1ctr3 copper transport mutant
orf19.5608	0.406545	0.000239	CAL0000539		Predicted ORF in Assemblies 19, 20 and 21
orf19.3584	0.406512	0.000241	CAL0005998		Predicted ORF from Assembly 19; merged with orf19.225 in Assembly 20
orf19.2264	0.406236	5.66e-05	CAL0006318	OLE2	Protein with similarity to fatty acid desaturase(stearoyl-CoA desaturase); homozygous null mutant showsdecreased production of prostaglandin E2
orf19.2778	0.406063	0.000322	CAL0004274		Predicted ORF in Assemblies 19, 20 and 21
orf19.7600	0.405607	0.000182	CAF0007267	FDH3	Putative protein of glycine catabolism;downregulated by Efg1p under yeast-form but not hyphalgrowth conditions
orf19.2248	0.404584	7.31e-05	CAL0006272	ARE2	Acyl CoA:sterol acyltransferase (ASAT); usescholesterol and oleoyl-CoA substrates; protoberberinederivative drug inhibits enzyme activity; 7 putativetransmembrane regions; ketoconazole-induced
orf19.6951	0.404249	0.00049	CAL0000297		Predicted ORF in Assemblies 19, 20 and 21
orf19.3275	0.403283	0.000211	CAL0003391		Predicted ORF in Assemblies 19, 20 and 21
orf19.1886	0.403211	0.00017	CAL0001795	RCL1	Predicted ORF in Assemblies 19, 20 and 21;essential; downregulated during core stress response; S.cerevisiae ortholog is essential
orf19.3195	0.402652	7.77e-05	CAL0002448	HIP1	Alkaline upregulated; flucytosine induced;regulated by Plc1p, Gcn2p and Gcn4p; fungal-specific (nohuman or murine homolog)
orf19.6369	0.401571	0.000218	CAL0001368		Predicted ORF in Assemblies 19, 20 and 21
orf19.5118	0.401369	0.000167	CAL0002512	SDS24	Protein described as similar to S. cerevisiaeYbr214wp; transcription regulated by Mig1p and Tup1p;fluconazole-induced
orf19.6420	0.400896	0.000322	CAL0002165	PGA13	Putative GPI-anchored protein; described assimilar to mucins; induced during cell wall regeneration,and during core caspofungin response; regulated by Tsa1p,Tsa1Bp in minimal media at 37 deg and by Cyr1p, Nrg1p,Tup1p, Rlm1p
orf19.2094	0.400605	4.28e-05	CAL0004566	PDR6	Transcription is regulated by Nrg1p;transcription is induced in response to alpha pheromone inSpiderM medium
orf19.2319	0.400005	9.2e-05	CAL0000677		Predicted ORF in Assemblies 19, 20 and 21;downregulated in core stress response
orf19.7650	0.399795	0.000175	CAL0000910		Predicted ORF in Assemblies 19, 20 and 21
orf19.5567	0.399299	0.000239	CAL0006215	POP4	Protein likely to be essential for growth, basedon an insertional mutagenesis strategy; similar to S.cerevisiae Pop4p, which is a subunit of both RNase MRP andnuclear RNase P; filament induced; regulated by Nrg1p,Tup1p
orf19.7278	0.399212	8.22e-05	CAL0003965		Similar to a region of the Tca2 (pCal)retrotransposon, which is present in strain hOG1042 as 50to 100 copies of a linear dsDNA
orf19.4029	0.399108	9.3e-05	CAL0004731		Predicted ORF in Assemblies 19, 20 and 21
orf19.2167	0.39811	8.89e-05	CAL0005395		Predicted ORF in Assemblies 19, 20 and 21
orf19.2193	0.397197	0.000269	CAL0005477	PRS5	Predicted ORF in Assemblies 19, 20 and 21;downregulated during core stress response
orf19.6527	0.396984	3.36e-05	CAL0003125		Predicted ORF in Assemblies 19, 20 and 21; showscolony morphology-related gene regulation by Ssn6p
orf19.3170	0.396405	0.000921	CAL0002385		Predicted ORF in Assemblies 19, 20 and 21
orf19.1961	0.396132	0.000135	CAL0002634		Predicted ORF in Assemblies 19, 20 and 21
orf19.3962	0.395777	6.07e-05	CAL0003050	HAS1	Functional homolog of S. cerevisiae Has1p, whichis a nucleolar protein of the DEAD-box ATP-dependent RNAhelicase family that is involved in biogenesis of theribosome, particularly the small (40S) subunit;caspofungin-downregulated
orf19.4640	0.394365	7.85e-05	CAL0003692	PWP1	Predicted ORF in Assemblies 19, 20 and 21;downregulated in core stress response
orf19.5032	0.393723	4.17e-05	CAL0001642	SIM1	Protein described as a DNA replicationregulatory protein; macrophage-downregulated gene;transcription is negatively regulated by Rim101p, Cyr1p,Ras1p
orf19.7296	0.392918	0.000159	CAL0004024		Predicted ORF in Assemblies 19, 20 and 21;similar to stomatin mechanoreception protein; induced byRgt1p
orf19.4436	0.392045	5.64e-05	CAL0001814		Predicted ORF in Assemblies 19, 20 and 21
orf19.3822	0.390884	7.13e-05	CAL0001985	SCS7	Protein described as ceramide hydroxylase;transcription is regulated by Nrg1p; transcriptionallyregulated by iron; expression greater in high iron;fluconazole-induced
orf19.775	0.390577	0.000526	CAL0001943		Predicted ORF in Assemblies 19, 20 and 21
orf19.6360	0.390055	0.000597	CAL0001356		Predicted ORF in Assemblies 19, 20 and 21
orf19.747	0.389444	6.29e-05	CAL0001838	NBP35	Similar to nucleotide-binding proteins;increased transcription is observed upon benomyltreatment; transcription is induced upon filamentousgrowth
orf19.6727	0.389378	0.000134	CAL0004801	RIT1	Putative initiator tRNA methionineribosyltransferase; fungal-specific (no human or murinehomolog)
orf19.5198	0.388822	7.18e-05	CAL0002736	NOP4	Predicted ORF in Assemblies 19, 20 and 21;downregulated in core stress response
orf19.5911	0.388322	0.000234	CAL0003264	CMK1	Expression is regulated upon white-opaqueswitching; biochemically purified Ca2+/CaM-dependentkinase is soluble, cytosolic, monomeric, and serine-autophosphorylated
orf19.4701	0.387913	9.3e-05	CAL0004342		Predicted ORF in Assemblies 19, 20 and 21
orf19.1923	0.387169	3.88e-05	CAL0002535	RRN3	Predicted ORF in Assemblies 19, 20 and 21;caspofungin induced, flucytosine repressed; downregulatedin core stress response
orf19.543	0.386728	0.000171	CAL0000200		Protein described as fumarate hydratase;transcriptionally regulated by iron; expression greater inhigh iron
orf19.2632	0.38604	0.000997	CAL0003429		Predicted ORF from Assembly 19; merged with orf19.3704 in Assembly 20
orf19.1027	0.385913	0.000239	CAL0001086	PDR16	Phosphatidylinositol transfer protein; increasedtranscription correlates with CDR1 and CDR2 overexpressionand azole resistance; induced by fluphenazine, 17-beta-estradiol, ethynyl estradiol, nitric oxide; farnesol-downregulated in biofilm
orf19.6766	0.385687	0.000392	CAL0004922		Predicted ORF in Assemblies 19, 20 and 21
orf19.7242	0.385671	0.000178	CAL0003873	NCR1	Transcription is regulated by Nrg1p and Mig1p
orf19.4887	0.384979	0.000207	CAL0005504	ECM21	Protein not essential for viability; similar toS. cerevisiae Ecm21p (may have cell wall role); alkalineupregulated by Rim101p; fluconazole induced; caspofunginrepressed; downregulated in azole-resistant strainoverexpressing MDR1
orf19.2242	0.38489	8.18e-05	CAL0006263	PRB1	Putative endoprotease B; regulated by heat,carbon source (GlcNAc-induced), nitrogen, macrophageresponse, human neutrophils; putative D200-H232-S389catalytic triad; similar to (but does not replace) S.cerevisiae vacuolar B protease Prb1p
orf19.3803	0.382691	0.000563	CAL0001902	MNN22	Protein described as similar to Golgi alpha-1,2-mannosyltransferase; regulated by Tsa1p, Tsa1Bp in minimalmedia at 37 deg; Hog1p-induced; induced by nitric oxide;downregulated in core stress response
orf19.5805	0.382179	0.000102	CAL0002250	DLD1	Transcription is specific to white cell type;shows colony morphology-related gene regulation by Ssn6p
orf19.3089	0.382108	2.46e-05	CAL0001508		Predicted ORF in Assemblies 19, 20 and 21
orf19.2268	0.381942	2.59e-05	CAL0006324	RCK2	Predicted ORF in Assemblies 19, 20 and 21;similar to S. cerevisiae serine/threonine protein kinase;induced by osmotic stress via Hog1p;macrophage/pseudohyphal-repressed
orf19.4763	0.380692	0.000134	CAL0004515		Protein not essential for viability
orf19.1028	0.380628	0.000366	CAL0001087		Predicted ORF in Assemblies 19, 20 and 21
orf19.5207	0.379825	0.000131	CAL0003487		Predicted ORF in Assemblies 19, 20 and 21
orf19.6955	0.379017	0.000137	CAL0000302	HBR3	Essential, uncharacterized protein; regulated byhemoglobin; S. cerevisiae ortholog is essential
orf19.5364	0.378435	8.71e-05	CAL0004353		Predicted ORF in Assemblies 19, 20 and 21;intron in 5'-UTR
orf19.7546	0.378229	8.67e-05	CAL0000056		Predicted ORF in Assemblies 19, 20 and 21
orf19.1957	0.377642	2.67e-05	CAL0002603	CYC3	Cytochrome c heme lyase, mitochondrial; genealso encodes antigenic cell-wall protein; mRNA moreabundant in filaments than yeast-form; induced onpolystyrene adherence, interaction with macrophage; N-glycosylation, 2 heme-binding motifs
orf19.1771	0.377245	3.4e-05	CAL0000928		Predicted ORF in Assemblies 19, 20 and 21
orf19.542	0.376827	0.000167	CAF0006900		ORF Predicted by Annotation Working Group
orf19.2501	0.375893	2.8e-05	CAL0002353	FLC1	Protein involved in heme uptake; putative FADtransporter, similar to S. cerevisiae Flc1p; regulated byiron; macrophage-induced gene; mutant shows defect infilamentous growth
orf19.3663	0.37589	5.14e-05	CAL0000434	PHO91	Putative low-affinity phosphate transporter;fungal-specific (no human or murine homolog)
orf19.5620	0.375084	0.000145	CAL0000581		Predicted ORF in Assemblies 19, 20 and 21;regulated by Gcn4p; induced in response to amino acidstarvation (3-aminotriazole treatment); increasedtranscription is observed upon benomyl treatment or in anazole-resistant strain that overexpresses MDR1
orf19.4077	0.374777	2.34e-05	CAL0004910	MIT1	Protein involved in sphingolipid biosynthesis;required for mannosylation of inositol phosphoceramide(IPC) to form mannosylated sphingolipids MIPC and M(IP)2C;fluconazole, caspofungin induced; macrophage-downregulatedgene
orf19.7424	0.374445	0.000738	CAL0005489		Predicted ORF in Assemblies 19, 20 and 21
orf19.6041	0.374199	5.31e-05	CAL0005126	RPO41	Predicted ORF in Assemblies 19, 20 and 21;downregulated during core stress response
orf19.4980	0.374082	0.000664	CAL0000006	HSP70	Putative chaperone of Hsp70 family; role insensitivity to beta-defensin peptides; heat-shock,amphotericin B, Cd, ketoconazole-induced; farnesol-downregulated in biofilm; surface localized in yeast-formand hyphal cells; antigenic in host
orf19.7479	0.373496	3.07e-05	CAL0005674	NTH1	Neutral trehalase; hyphal induction inhomozygous null mutant is delayed but not reduced overall;not required for virulence in mouse systemic infection;homodimeric enzyme; possible regulatory cAMP-dependentphosphorylation at S10 and S213
orf19.2504	0.372999	0.000344	CAL0002359	BMS1	Predicted ORF in Assemblies 19, 20 and 21;flucytosine induced
orf19.6917	0.372848	0.000172	CAL0000169		Predicted ORF in Assemblies 19, 20 and 21
orf19.4282	0.37228	9.28e-05	CAL0000350		Predicted ORF in Assemblies 19, 20 and 21;greater mRNA abundance observed in a cyr1 homozygous nullmutant than in wild type; possibly spurious ORF(Annotation Working Group prediction)
orf19.1174	0.371894	0.00041	CAL0002097		Predicted ORF from Assembly 19; merged with orf19.4173 in Assembly 20
orf19.5912	0.371824	6.34e-05	CAL0003265		Predicted ORF in Assemblies 19, 20 and 21
orf19.260	0.371016	7.81e-05	CAL0004027		Predicted ORF in Assemblies 19, 20 and 21
orf19.3507	0.370684	2.59e-05	CAL0005780	MCR1	Protein described as NADH-cytochrome-b5reductase; soluble protein in hyphae; alkalinedownregulated; ketoconazole or flucytosine induced
orf19.829	0.370388	5.3e-05	CAL0002687	SCH9	Protein required for chlamydospore formation andfor embedded hyphal growth, not essential for viability;similar to S. cerevisiae Sch9p, which is a protein kinaseinvolved in growth control
orf19.1200	0.369065	4.57e-05	CAL0002759		Predicted ORF in Assemblies 19, 20 and 21;possibly spurious ORF (Annotation Working Groupprediction)
orf19.1791	0.368783	9.98e-05	CAL0000994		Predicted ORF in Assemblies 19, 20 and 21
orf19.583	0.368704	3.48e-05	CAL0000331		Putative indoleamine 2,3-dioxygenase (IDO); IDOis the rate-limiting enzyme of tryptophan catabolism viakynurenine pathway; enzyme inhibition by 1-methyl-D,L-tryptophan causes increased hyphal growth; expressed inyeast-form cells and hyphae
orf19.4492	0.367643	5.13e-05	CAL0002033		Predicted ORF in Assemblies 19, 20 and 21
orf19.6014	0.366894	8.06e-05	CAL0005046		Predicted ORF in Assemblies 19, 20 and 21
orf19.4857	0.366197	5.07e-05	CAL0005405		Predicted ORF in Assemblies 19, 20 and 21
orf19.3305	0.365996	9.09e-05	CAL0004047		Putative transcription factor with zinc clusterDNA-binding motif
orf19.6079	0.365905	2.03e-05	CAL0005197		Predicted ORF in Assemblies 19, 20 and 21;transcription is downregulated in response to treatmentwith ciclopirox olamine; filament induced; regulated byRfg1p, Tup1p
orf19.3463	0.365504	9.95e-05	CAL0005034		Predicted ORF in Assemblies 19, 20 and 21
orf19.4947	0.364521	5.17e-05	CAL0006307		Predicted ORF in Assemblies 19, 20 and 21
orf19.6266	0.364382	3.8e-05	CAL0000542		Predicted ORF in Assemblies 19, 20 and 21
orf19.7599	0.363182	0.000382	CAL0000260		Predicted ORF in Assemblies 19, 20 and 21
orf19.3867	0.362963	0.000262	CAL0002123	RPL7	Putative ribosomal-related protein; genesencoding cytoplasmic ribosomal subunits, translationfactors, and tRNA synthetases are downregulated uponphagocytosis by murine macrophage
orf19.35	0.362681	1.86e-05	CAL0000551		Predicted ORF in Assemblies 19, 20 and 21
orf19.23	0.362222	5.4e-05	CAL0000521	RTA3	Similar to S. cerevisiae Rta1p (role in 7-aminocholesterol resistance) and Rsb1p (flippase);putative membrane protein; putative drug-responsiveregulatory site; induced by fluphenazine, estradiol,ketoconazole, caspofungin
orf19.966	0.362144	0.000272	CAL0003746		Predicted ORF in Assemblies 19, 20 and 21
orf19.5635	0.362044	0.00014	CAL0000616	PGA7	Protein described as a putative precursor of ahyphal surface antigen; putative GPI-anchor; induced byciclopirox olamine, ketoconazole, or by Rim101p at pH 8;regulated during planktonic growth; induced during cellwall regeneration
orf19.6263	0.361856	2.59e-05	CAL0000536		Predicted ORF in Assemblies 19, 20 and 21
orf19.1441	0.361841	5.13e-05	CAL0004586		Predicted ORF in Assemblies 19, 20 and 21
orf19.3944	0.361219	3.14e-05	CAL0002979	GRR1	Protein involved in the negative control ofpseudohyphal growth; ortholog of &lt;i&gt;S. cerevisiae&lt;/i&gt;Grr1p, which is an F-box protein component of the SCFubiquitin-ligase complex required for cell cycleprogression
orf19.839	0.358437	6.16e-05	CAL0002720		Predicted ORF in Assemblies 19, 20 and 21;induced by nitric oxide in yhb1 mutant
orf19.4966	0.35808	5.47e-05	CAL0006367		Protein not essential for viability;transcription is alkaline upregulated
orf19.6586	0.35762	8.27e-05	CAL0003313		Predicted ORF in Assemblies 19, 20 and 21;increased transcription is observed upon benomyl treatmentor in an azole-resistant strain that overexpresses MDR1;shows colony morphology-related gene regulation by Ssn6p;induced by nitric oxide, 17-beta-estradiol
orf19.2375	0.357168	5.97e-05	CAL0000787		Predicted ORF from Assembly 19; orf19.2371, orf19.2372, and orf19.2375 are similar to the Tca2 (pCal) retrotransposon, which is present in strain hOG1042 as 50 to 100 copies of a linear dsDNA; removed from Assembly 20
orf19.6947	0.357013	5.47e-05	CAL0000275		Predicted ORF in Assemblies 19, 20 and 21;induced by nitric oxide
orf19.1589	0.35688	0.000352	CAL0005647		Putative DNA-binding transcription factor
orf19.4304	0.35683	2.75e-05	CAL0000889	GAP1	General amino acid permease; antigenic in human;10-12 transmembrane regions; regulated by nitrogen source;alkaline, GlcNAc, phagocytosis upregulated; not requiredfor virulence in mouse systemic infection; fungal-specific
orf19.6648	0.356087	0.000257	CAL0004046		Predicted ORF in Assemblies 19, 20 and 21
orf19.5754	0.354934	2.37e-05	CAL0001469		Predicted ORF in Assemblies 19, 20 and 21;fluconazole-induced
orf19.2320	0.354785	3.74e-05	CAL0000691		Predicted ORF in Assemblies 19, 20 and 21
orf19.6078	0.354629	2.1e-05	CAF0007065	IPF14619.2	ORF Predicted by Annotation Working Group
orf19.3724	0.354483	0.000159	CAL0001138		Predicted ORF in Assemblies 19, 20 and 21
orf19.4519	0.353941	2.77e-05	CAL0002663	SUV3	Protein required for chlamydospore formation,for embedded hyphal growth, and for wild-type respiratorygrowth; similar to S. cerevisiae Suv3p, which is an RNAhelicase involved in mitochondrial RNA catabolism
orf19.7593	0.3534	7.03e-05	CAL0000243		Predicted ORF in Assemblies 19, 20 and 21
orf19.353	0.351742	3.48e-05	CAL0004825	ULP1	Putative SUMO deconjugation enzyme that cleavesthe small ubiquitin-like modifier (SUMO) off proteins
orf19.7552	0.350086	0.000606	CAL0000085		Predicted ORF in Assemblies 19, 20 and 21;downregulated during core stress response
orf19.2324	0.349912	0.000416	CAL0000697		Predicted ORF in Assemblies 19, 20 and 21
orf19.5953	0.349637	8.02e-05	CAL0003373		Predicted ORF in Assemblies 19, 20 and 21
orf19.7468	0.34952	0.000158	CAL0005632		Predicted ORF in Assemblies 19, 20 and 21
orf19.1045	0.349268	5.04e-05	CAL0001156		Predicted ORF in Assemblies 19, 20 and 21
orf19.5465	0.348989	4.98e-05	CAL0005297		Predicted ORF in Assemblies 19, 20 and 21
orf19.1404	0.348619	9.97e-05	CAL0004455		Predicted ORF in Assemblies 19, 20 and 21
orf19.5372	0.348609	4.09e-05	CAL0004373		Predicted ORF from Assembly 19; orf19.5372 and orf19.5373 are similar to the Tca2 (pCal) retrotransposon, which is present in strain hOG1042 as 50 to 100 copies of a linear dsDNA; removed from Assembly 20; transcription is Tbf1p-activated
orf19.2462	0.348053	0.000101	CAL0001581	PRN3	Predicted ORF in Assemblies 19, 20 and 21;similar to pirin
orf19.3644	0.346844	4.17e-05	CAL0000403		Predicted ORF in Assemblies 19, 20 and 21;greater mRNA abundance observed in a cyr1 homozygous nullmutant than in wild type
orf19.58	0.346834	5.73e-05	CAL0000608		Predicted ORF in Assemblies 19, 20 and 21
orf19.3015	0.344937	4.25e-05	CAL0001348		Predicted ORF in Assemblies 19, 20 and 21;downregulated during core stress response
orf19.7077	0.344898	0.000736	CAL0002145		Protein of unknown function; Plc1p-regulated;transcription is negatively regulated by Rim101p
orf19.2362	0.344769	2.37e-05	CAL0000762		Predicted ORF in Assemblies 19, 20 and 21
orf19.4281	0.344416	0.00035	CAL0000347		Predicted ORF in Assemblies 19, 20 and 21
orf19.6831	0.343962	2.28e-05	CAL0005725	PRP5	Protein described as a pre-mRNA processing RNA-helicase; induced upon adherence to polystyrene
orf19.5865	0.343772	4.55e-05	CAL0002409		Predicted ORF in Assemblies 19, 20 and 21
orf19.5232	0.343332	0.000107	CAL0003537	CSI2	Protein essential for growth; transposonmutation affects filamentous growth
orf19.7635	0.343151	3.47e-05	CAL0000864	DRS1	Predicted ORF in Assemblies 19, 20 and 21;downregulated during core stress response
orf19.2261	0.342317	0.00014	CAL0006311		Predicted ORF in Assemblies 19, 20 and 21
orf19.7437	0.341808	2.23e-05	CAL0005517		Predicted ORF in Assemblies 19, 20 and 21
orf19.501	0.341416	2.73e-05	CAL0000046		Predicted ORF in Assemblies 19, 20 and 21
orf19.3038	0.340698	3.31e-05	CAL0001393	TPS2	Trehalose-6-phosphate (Tre6P) phosphatase;mutation causes heat sensitivity, Tre6P accumulation, anddecreased mouse virulence; possible drug target; twoconserved phospohydrolase motifs; no human or murinehomolog
orf19.4951	0.340303	4.48e-05	CAL0006327		Predicted ORF in Assemblies 19, 20 and 21;possibly spurious ORF (Annotation Working Groupprediction)
orf19.3809	0.340076	0.000312	CAL0001915	BAS1	Putative transcription factor with Myb-like DNA-binding motif; similar to S. cerevisiae Bas1p, which is aregulator of purine biosynthetic genes; ADE genes are notinduced during GCN response in C. albicans, in contrast toS. cerevisiae
orf19.5049	0.339111	2.15e-05	CAL0001673		Predicted ORF in Assemblies 19, 20 and 21;induced upon biofilm formation
orf19.2876	0.338565	3.31e-05	CAL0005201	CBF1	Functional homolog of S. cerevisiae Cbp1pcentromere binding protein and transcription factor;contains basic helix-loop helix zipper DNA-binding/dimerization domain; mutant defects in morphology,sulfur amino acid biosynthesis, and growth
orf19.691	0.338254	2.57e-05	CAL0001161	GPD2	Similar to glycerol 3-P dehydrogenases;regulated by Ssn6p (colony morphology-related), Nrg1p,Efg1p; induced upon osmotic and oxidative stress (viaHog1p), cell wall regeneration, macrophage/pseudohyphalgrowth, core stress response
orf19.6877	0.338126	6.22e-05	CAL0005876		Predicted ORF in Assemblies 19, 20 and 21;transcription is upregulated in response to treatment withcaspofungin, ciclopirox olamine or ketoconazole; gene ofcore caspofungin response
orf19.3945	0.337699	0.00014	CAL0002980		Predicted ORF in Assemblies 19, 20 and 21
orf19.275	0.337082	0.000288	CAL0004064		Predicted ORF in Assemblies 19, 20 and 21
orf19.2564	0.337018	7.48e-05	CAL0002504		Predicted ORF in Assemblies 19, 20 and 21
orf19.515	0.336696	3.79e-05	CAL0000082		Predicted ORF in Assemblies 19, 20 and 21
orf19.1704	0.335941	0.000121	CAL0000760	FOX3	Putative peroxisomal 3-oxoacyl CoA thiolase;expression is regulated upon white-opaque switching
orf19.5407	0.335576	3.62e-05	CAL0005164		Predicted ORF in Assemblies 19, 20 and 21
orf19.3300	0.335516	2.7e-05	CAL0004036	ZPR1	Protein with putative zinc finger; regulated byGcn4p; repressed in response to amino acid starvation (3-aminotriazole treatment); upregulation correlates withclinical development of fluconazole resistance
orf19.6992	0.334225	0.00445226	CAL0000412		Predicted ORF in Assemblies 19, 20 and 21
orf19.1785	0.333504	2.43e-05	CAL0000965		Predicted ORF in Assemblies 19, 20 and 21
orf19.2859	0.332922	2.53e-05	CAL0005156	SRP40	Predicted ORF in Assemblies 19, 20 and 21;macrophage/pseudohyphal-induced
orf19.7028	0.33278	2.44e-05	CAL0001979		Predicted ORF in Assemblies 19, 20 and 21
orf19.2667	0.332496	5.12e-05	CAL0003496	RPF1	Predicted ORF in Assemblies 19, 20 and 21;essential for growth
orf19.7570	0.332421	4.54e-05	CAL0000161		Putative transcription factor with zinc clusterDNA-binding motif; has similarity to S. cerevisiae Uga3p,which is a transcription factor involved in the regulationof gamma-aminobutyrate metabolism genes
orf19.6091	0.332147	0.00231218	CAL0005233	RIM8	Protein involved in the pH response pathway;required for activation of the transcription factorRim101p and for alkaline pH-induced hyphal growth; showscolony morphology-related gene regulation by Ssn6p
orf19.5508	0.330982	7.12e-05	CAL0006069		Predicted ORF in Assemblies 19, 20 and 21
orf19.6472	0.330937	1.28e-05	CAL0002277	CYP1	Peptidyl-propyl cis-trans isomerase (PPIase);activity is cyclosporin A sensitive; soluble protein inhyphae; downregulated upon treatment of biofilm withfarnesol; macrophage-induced protein
orf19.5134	0.330551	0.000104	CAL0002551		Predicted ORF in Assemblies 19, 20 and 21
orf19.1034	0.33019	1.96e-05	CAL0001120		Predicted ORF in Assemblies 19, 20 and 21;caspofungin repressed
orf19.3914	0.32989	4.99e-05	CAL0002861		Predicted ORF in Assemblies 19, 20 and 21
orf19.3713	0.329167	2.01e-05	CAL0001098		Predicted ORF in Assemblies 19, 20 and 21;possibly spurious ORF (Annotation Working Groupprediction)
orf19.4815	0.328901	0.000149	CAF0006878	YTM1	Protein similar to S. cerevisiae Ytm1p, which isinvolved in biogenesis of the large ribosomal subunit;transposon mutation affects filamentous growth
orf19.3370	0.328722	6.32e-05	CAL0004185	DOT4	Protein similar to ubiquitin C-terminalhydrolase; localizes to cell surface of hyphal cells, butnot yeast-form cells; repressed upon high-level peroxidestress
orf19.7363	0.328604	4.24e-05	CAL0004712	KRE6	Protein of beta-1,6-glucan synthesis; essential;type II membrane protein; N-glycosylation sites; change inmRNA length, but not mRNA abundance, at yeast-hyphaltransition; alkaline upregulated by Rim101p; induced oncell wall regeneration
orf19.2881	0.32783	1.87e-05	CAL0005219	MNN4	Protein required for normalmannosylphosphorylation of oligosaccharides linked to cellwall proteins, not required for virulence or kidneycolonization in mouse systemic infection or for normalinteraction with macrophages
orf19.111	0.327424	0.000282	CAL0002992	CAN2	Putative amino acid permease; transcription isregulated by Nrg1p and Tup1p; caspofungin induced;flucytosine induced; shows colony morphology-related generegulation by Ssn6p; ; fungal-specific (no human or murinehomolog)
orf19.2686	0.32643	7.95e-05	CAL0003533		Predicted ORF in Assemblies 19, 20 and 21
orf19.5850	0.325771	4.24e-05	CAL0002373	NOC2	Protein similar to S. cerevisiae Noc2p;transposon mutation affects filamentous growth;downregulated during core stress response
orf19.3870	0.325526	5.86e-05	CAL0002147	ADE13	Enzyme of adenine biosynthesis; soluble proteinin hyphae; not induced during GCN response, in contrast tothe S. cerevisiae ortholog; repressed by nitric oxide
orf19.3088	0.325382	0.000186	CAL0001507		Putative transcription factor with bZIP DNA-binding motif; induced upon biofilm formation; possiblytranscriptionally regulated upon hyphal formation
orf19.4479	0.32487	1.1e-05	CAL0001965		Predicted ORF in Assemblies 19, 20 and 21;downregulated during core stress response
orf19.3522	0.324105	0.000122	CAL0005836		Predicted ORF in Assemblies 19, 20 and 21;transcription is downregulated in response to treatmentwith ciclopirox olamine
orf19.3477	0.32391	3.62e-05	CAL0005064		Predicted ORF in Assemblies 19, 20 and 21
orf19.54	0.323614	7.59e-05	CAL0000604	RHD1	Putative transmembrane protein with hydrophobicN and C termini and a Ser-Gly rich region; transcriptionis decreased upon yeast-hyphal switch; expression isregulated upon white-opaque switching
orf19.500	0.322565	0.000125	CAL0000045		Predicted ORF in Assemblies 19, 20 and 21
orf19.1226	0.322112	1.41e-05	CAL0002839		Predicted ORF from Assembly 19; merged with orf19.2778 in Assembly 20
orf19.5106	0.322014	2.55e-05	CAL0002491	DIP2	Protein similar to S. cerevisiae Dip2p, of smallribonucleoprotein complex; transposon mutation affectsfilamentous growth
orf19.5299	0.321659	3.79e-05	CAL0003683	ECM1	Decreased mRNA abundance observed in cyr1homozygous mutant hyphae; induced by heavy metal (cadmium)stress; Hog1p regulated
orf19.3360	0.321298	1.41e-05	CAL0004167		Predicted ORF in Assemblies 19, 20 and 21;possibly spurious ORF (Annotation Working Groupprediction)
orf19.2933	0.320117	0.000113	CAL0006014		Predicted ORF in Assemblies 19, 20 and 21
orf19.868	0.319555	6.53e-05	CAL0002823	ADAEC	Transcription is specific to white cell type
orf19.2119	0.319431	1.41e-05	CAL0005285	NDT80	Activator of CDR1 induction by antifungal drugs;required for wild-type drug resistance; transcriptionallyinduced upon antifungal drug treatment; similar to S.cerevisiae Ndt80p, which is a meiosis-specifictranscriptional regulator
orf19.2371	0.319391	2.2e-05	CAL0000780		Putative Gag protein of retrotransposon Tca2; separated by a stop codon from Pol protein orf19.2372; both likely translated as single polyprotein that includes nucleocapsid-like protein (Gag), reverse transcriptase, protease, and integrase
orf19.158	0.319321	1.41e-05	CAL0003160		Predicted ORF in Assemblies 19, 20 and 21
orf19.2737	0.318344	2.17e-05	CAL0004219		Predicted ORF in Assemblies 19, 20 and 21
orf19.4088	0.316646	9.82e-06	CAL0004940		Predicted ORF in Assemblies 19, 20 and 21
orf19.970	0.316278	0.000376	CAL0003769		Predicted ORF in Assemblies 19, 20 and 21
orf19.124	0.315648	1.87e-05	CAL0003033		Predicted ORF in Assemblies 19, 20 and 21
orf19.4952	0.315353	1.17e-05	CAF0007028		ORF Predicted by Annotation Working Group
orf19.29	0.314908	2.59e-05	CAL0000527		Predicted ORF in Assemblies 19, 20 and 21
orf19.7361	0.314623	0.000132	CAL0004706		Predicted ORF in Assemblies 19, 20 and 21
orf19.706	0.313935	0.00012	CAL0001704	NMD3	Predicted ORF in Assemblies 19, 20 and 21;downregulated in core stress response
orf19.285	0.313279	1.18e-05	CAL0004087		Predicted ORF in Assemblies 19, 20 and 21
orf19.1114	0.311756	1.15e-05	CAL0001879		Predicted ORF in Assemblies 19, 20 and 21
orf19.475	0.310903	3.5e-05	CAL0005798		Predicted ORF in Assemblies 19, 20 and 21
orf19.5112	0.310763	1.29e-05	CAL0002508	TKL1	Putative transketolase; localizes to surface ofyeast-form cells, but not hyphae; soluble protein inhyphae; transcription is regulated by Nrg1p, Mig1p, andTup1p; antigenic in human or murine infection
orf19.4563	0.310223	0.000695	CAL0002825		Predicted ORF in Assemblies 19, 20 and 21
orf19.3441	0.309634	1.08e-05	CAL0004985	FRP6	Transcription is regulated by Nrg1p and Tup1p;regulated by Ssn6p; upregulated in the presence of humanneutrophils
orf19.6402	0.309588	1.24e-05	CAL0002103	CYS3	Predicted enzyme of sulfur amino acidbiosynthesis; upregulated in biofilm; alkalineupregulated; amphotericin B induced; possibly adherence-induced; induced by heavy metal (cadmium) stress,oxidative stress (via Cap1p); Hog1p regulated
orf19.4273	0.309318	3.59e-05	CAL0000318		Predicted ORF in Assemblies 19, 20 and 21
orf19.4456	0.30881	1.65e-05	CAL0001876	GAP4	Putative amino acid permease; hyphal induced;regulated by Gcn2p and Gcn4p; shows colony morphology-related gene regulation by Ssn6p; detected at plasmamembrane of yeast-form and germ tube by mass spectrometry
orf19.2374	0.308562	5.82e-05	CAL0000785		Predicted ORF from Assembly 19; removed from Assembly 20
orf19.4234	0.308362	0.000664	CAL0000181		Predicted ORF in Assemblies 19, 20 and 21
orf19.6514	0.307713	1.77e-05	CAL0003077	CUP9	Transcription reduced upon yeast-hyphal switch;ketoconazole-induced; Plc1p-regulated; shows colonymorphology-related gene regulation by Ssn6p
orf19.7502	0.306892	3.62e-05	CAL0006352		Predicted ORF in Assemblies 19, 20 and 21;greater mRNA abundance observed in a cyr1 homozygous nullmutant than in wild type; possibly spurious ORF(Annotation Working Group prediction)
orf19.7187	0.306751	2.22e-05	CAL0003133	MAM33	Predicted ORF in Assemblies 19, 20 and 21;regulated by Ssn6p
orf19.647.3	0.306737	0.000135	CAF0006906		ORF Predicted by Annotation Working Group
orf19.1609	0.306619	1.28e-05	CAL0006321		Predicted ORF in Assemblies 19, 20 and 21
orf19.320	0.306208	2.73e-05	CAL0004696		Predicted ORF in Assemblies 19, 20 and 21
orf19.3575	0.3061	4.28e-05	CAL0005977	CDC19	Putative pyruvate kinase; on yeast-form cellsurface; soluble in hyphae; antigenic; Gcn4p, Hog1pregulated; induced on polystyrene adherence; downregulatedupon phagocytosis; mutation affects filamentation
orf19.1304	0.306097	6.18e-05	CAL0003704		Predicted ORF in Assemblies 19, 20 and 21
orf19.1285	0.306079	5.13e-05	CAL0003062		Predicted ORF in Assemblies 19, 20 and 21
orf19.4358	0.306066	1.64e-05	CAL0001047		Predicted ORF in Assemblies 19, 20 and 21
orf19.5192	0.305667	5.77e-05	CAL0002726		Predicted ORF from Assembly 19; removed from Assembly 20
orf19.7618	0.305545	2.66e-05	CAL0000825		Predicted ORF in Assemblies 19, 20 and 21; Plc1p-regulated
orf19.4793	0.305439	6.87e-05	CAL0004612		Predicted ORF in Assemblies 19, 20 and 21
orf19.5430	0.305337	5.24e-05	CAL0005228		Predicted ORF in Assemblies 19, 20 and 21
orf19.5615	0.303664	0.000134	CAL0000562	AYR2	Predicted ORF in Assemblies 19, 20 and 21; showscolony morphology-related gene regulation by Ssn6p
orf19.773	0.303488	5.13e-05	CAL0001939		Putative ortholog of S. cerevisiae Rsa3p, whichis a nucleolar protein involved in maturation of pre-60Sribosomal particles that interacts with Dbp6p
orf19.1687	0.303427	0.000101	CAL0000153		Predicted ORF in Assemblies 19, 20 and 21
orf19.6477	0.302847	7.13e-05	CAL0002289		Predicted ORF in Assemblies 19, 20 and 21
orf19.5991	0.30158	4.08e-05	CAL0003464		Predicted ORF in Assemblies 19, 20 and 21
orf19.2385	0.301297	0.000774	CAL0000813	KTI12	Protein similar to S. cerevisiae Kti12p, whichassociates with Elongator complex; has a role inresistance to killer toxin; predicted Kex2p substrate
orf19.4961	0.301164	8.84e-06	CAL0006359	STP2	Transcription factor; activates transcription ofgenes encoding amino acid permeases; activated via amino-acid-induced proteolytic processing (Ssy1p and Csh3pdependent); also amino-acid-regulated
orf19.5678	0.300903	0.00155866	CAL0000723		Predicted ORF in Assemblies 19, 20 and 21
orf19.5525	0.300837	3.13e-05	CAL0006116		Protein abundance is affected by URA3 expressionin the CAI-4 strain background; regulated by Efg1p andEfh1p; repressed by Rgt1p
orf19.3393	0.300383	2.83e-05	CAL0004220		Putative DEAD-box helicase
orf19.3278	0.300027	3.8e-05	CAL0003394	GSY1	Protein described as glycogen synthase; enzymeof glycogen metabolism; transcription downregulated uponyeast-hyphal switch and regulated by Efg1p; strongoxidative stress induced; shows colony morphology-relatedgene regulation by Ssn6p
orf19.107	0.298967	2.56e-05	CAL0002969		Predicted ORF in Assemblies 19, 20 and 21
orf19.3127	0.298162	1.76e-05	CAL0002268	CZF1	Transcriptional regulator of white-opaqueswitching; hyphal growth regulator; has C-terminal zincfinger and central Glu-rich region; expression in S.cerevisiae causes dominant-negative inhibition ofpheromone response
orf19.1090	0.298136	2.41e-05	CAL0001275		Predicted ORF in Assemblies 19, 20 and 21;possibly spurious ORF (Annotation Working Groupprediction)
orf19.4173	0.298116	0.000126	CAL0005815		Predicted ORF in Assemblies 19, 20 and 21
orf19.3978	0.296657	1.44e-05	CAL0003101		Predicted ORF in Assemblies 19, 20 and 21
orf19.3041	0.296557	4.15e-05	CAL0001405		Predicted ORF in Assemblies 19, 20 and 21
orf19.6070	0.296551	2.69e-05	CAL0005183	ENA2	Described as sodium transporter; transcriptionis upregulated in response to treatment with ciclopiroxolamine; alkaline upregulated by Rim101p; repressed uponhigh-level peroxide stress
orf19.6731.1	0.296528	9.85e-06	CAL0004822		Predicted ORF in Assemblies 19, 20 and 21;transcription is repressed in response to alpha pheromonein SpiderM medium
orf19.3547	0.29625	2.15e-05	CAL0005913		Predicted ORF in Assemblies 19, 20 and 21
orf19.1708	0.295903	8.86e-05	CAL0000767		Predicted ORF in Assemblies 19, 20 and 21
orf19.379	0.295577	1.36e-05	CAL0004904		Predicted ORF from Assembly 19; removed from Assembly 20
orf19.4960	0.29524	2.28e-05	CAL0006358		Predicted ORF in Assemblies 19, 20 and 21
orf19.2386	0.294902	1.3e-05	CAL0000815		Predicted ORF in Assemblies 19, 20 and 21
orf19.3302	0.294728	2.02e-05	CAL0004041		Predicted ORF in Assemblies 19, 20 and 21;transcription downregulated upon yeast-hyphal switch
orf19.4892	0.29469	1.73e-05	CAL0005520	TPK1	Catalytic subunit of cAMP-dependent proteinkinase (PKA), isoform of Tpk2p; involved in control ofmorphogenesis and stress response; wild-type nuclearlocalization requires Bcy1p; produced during stationarybut not exponential growth
orf19.2474	0.294683	0.000232	CAL0001608	PRC3	Transcription is regulated by Nrg1p and Mig1p;regulated by Gcn2p and Gcn4p
orf19.3448	0.293093	0.000107	CAL0004997		Predicted ORF in Assemblies 19, 20 and 21;ketoconazole-repressed; possibly spurious ORF (AnnotationWorking Group prediction)
orf19.4150	0.292779	9.09e-05	CAL0005739		Predicted ORF in Assemblies 19, 20 and 21;induced by nitric oxide
orf19.3712	0.292575	1.05e-05	CAL0001096		Predicted ORF in Assemblies 19, 20 and 21
orf19.395	0.291958	0.00210385	CAL0004953	ENO1	Enolase (2-phospho-D-glycerate-hydrolyase),enzyme of glycolysis and gluconeogenesis; major cell-surface antigen; binds host plasmin and plasminogen;immunoprotective; single C. albicans enolase gene; biofilm-induced; phagocytosis-repressed
orf19.6578	0.291615	1.17e-05	CAL0003288		Predicted ORF in Assemblies 19, 20 and 21;downregulated in core caspofungin response
orf19.744	0.290913	8.54e-06	CAL0001834	GDB1	Putative glycogen debranching enzyme; expressionis regulated upon white-opaque switching; regulated byNrg1p, Tup1p
orf19.1849	0.290734	8.5e-05	CAL0001680		Predicted ORF in Assemblies 19, 20 and 21
orf19.6640	0.29034	2.48e-05	CAL0004028	TPS1	Trehalose-6-phosphate synthase; required fortrehalose synthesis; role in hyphal growth and virulencein a mouse systemic infection; upregulated in the presenceof human neutrophils; macrophage/pseudohyphal-repressedafter 16 h
orf19.5206	0.290108	1.94e-05	CAL0003486		Predicted ORF in Assemblies 19, 20 and 21
orf19.4836	0.290098	1.08e-05	CAL0005359	URA1	Dihydroorotate dehydrogenase (DHODH); enzyme ofde novo pyrimidine biosynthesis; putative bipartitemitochondrial targeting motif, membrane spanning region;transcription is regulated upon yeast-hyphal switch, or byNrg1p, Mig1p, Tup1p
orf19.3778	0.289919	7.85e-05	CAL0001276		Predicted ORF in Assemblies 19, 20 and 21;downregulated in core stress response
orf19.4941	0.289878	0.000884	CAL0006300	TYE7	Putative bHLH (basic region, helix-loop-helix)transcription factor; hyphally regulated via Cph1p, Cyr1p;flucytosine, Hog1p induced; amphotericin B, caspofunginrepressed; downregulated in azole-resistant strainoverexpressing MDR1
orf19.1187	0.288727	1.59e-05	CAL0002132	CPH2	Transcriptional activator of hyphal growth; MycbHLH family: directly regulates Tec1p, which regulateshypha-specific genes; probably homodimeric,phosphorylated; enhances S. cerevisiae nitrogen starvation-induced pseudohyphal growth
orf19.941	0.288648	1.25e-05	CAL0003685	SEC14	Essential protein; functional homolog of S.cerevisiae Sec14p, which is a Golgiphosphatidylinositol/phosphatidylcholine transfer proteinthat regulates choline-phosphate cytidyltransferase andthereby affects secretion; biofilm-regulated
orf19.7154	0.288623	4.24e-05	CAL0003002		Predicted ORF in Assemblies 19, 20 and 21;downregulated during core stress response
orf19.2613	0.287449	2.95e-05	CAL0003379	ECM4	Protein similar to S. cerevisiae Ecm4p;transcription is regulated by Nrg1p and Tup1p; induced incore stress response or in cyr1 or ras1 homozygous nullmutant (yeast-form or hyphal cells); transposon mutationaffects filamentous growth
orf19.1091	0.286065	0.000171	CAL0001277		Putative ortholog of S. cerevisiae Nop8p, whichis a nucleolar protein required for 60S ribosomal subunitbiogenesis
orf19.2314	0.284505	2.22e-05	CAL0000672		Predicted ORF in Assemblies 19, 20 and 21
orf19.951	0.284051	5.72e-05	CAL0003712		Predicted ORF in Assemblies 19, 20 and 21;transcription downregulated upon yeast-hyphal switch;fluconazole-induced; possibly spurious ORF (AnnotationWorking Group prediction)
orf19.409	0.283899	1.73e-05	CAL0005548		Predicted membrane protein; similar to S.cerevisiae Ynr018Wp
orf19.1646	0.282419	5.87e-05	CAL0000019		Predicted ORF in Assemblies 19, 20 and 21
orf19.7481	0.281161	1.4e-05	CAL0005697	MDH1	Protein described as malate dehydrogenase,mitochondrial; transcription regulated by Mig1p and Tup1p,white-opaque switching; expression greater in high iron;regulated upon phagocytosis; antigenic during murine orhuman infection
orf19.7624	0.281083	1.83e-05	CAL0000848		Predicted ORF in Assemblies 19, 20 and 21
orf19.4199	0.280835	3.47e-05	CAL0005895		Predicted ORF in Assemblies 19, 20 and 21
orf19.4964	0.28041	0.000307	CAL0006363		Predicted ORF in Assemblies 19, 20 and 21
orf19.2717	0.279913	3.01e-05	CAL0004189	SAS10	Predicted ORF in Assemblies 19, 20 and 21;repressed upon high-level peroxide stress
orf19.6589	0.279827	4.3e-05	CAL0003319		Predicted ORF in Assemblies 19, 20 and 21
orf19.4906	0.279447	2.29e-05	CAL0006203		Predicted ORF in Assemblies 19, 20 and 21
orf19.2942	0.279323	6.65e-06	CAL0006036	DIP5	Putative permease for dicarboxylic amino acids;transcriptionally induced upon phagocytosis by macrophage;Gcn4p-regulated; upregulated by Rim101p at pH 8
orf19.2527	0.278429	6.22e-05	CAL0002419		Predicted ORF in Assemblies 19, 20 and 21;induced upon biofilm formation
orf19.6470	0.278149	7.99e-06	CAL0002274	AHP2	Predicted ORF in Assemblies 19, 20 and 21;macrophage-downregulated gene
orf19.6081	0.277597	9.48e-06	CAL0005209	PHR2	Glycosidase; role in cell wall structure; mayact on beta-1,3-glucan prior to beta-1,6-glucan linkage;role in vaginal but not systemic virulence (low pH, notneutral); low pH, high iron, fluconazole induced; Rim101p-downregulated at pH 8
orf19.5959	0.276634	5.47e-05	CAL0003384		Predicted ORF in Assemblies 19, 20 and 21
orf19.1566	0.276545	1.22e-05	CAL0005566		Predicted ORF in Assemblies 19, 20 and 21
orf19.4416	0.276197	0.000102	CAL0001755	VPS13	Predicted ORF in Assemblies 19, 20 and 21; geneused for multilocus sequence typing
orf19.1788	0.276022	2.51e-05	CAL0000968		Predicted ORF from Assembly 19; merged with orf19.1290 in Assembly 20
orf19.1742	0.275959	8.62e-05	CAL0000854	HEM3	Hydroxymethylbilane synthase (uroporphyrinogen Isynthase); catalyzes the conversion of 4-porphobilinogento hydroxymethylbilane, the third step in the hemebiosynthetic pathway; transcription greater in high iron;alkaline downregulated
orf19.4816	0.273822	3.48e-05	CAL0005316		Predicted ORF in Assemblies 19, 20 and 21;induced by nitric oxide
orf19.2172	0.273731	4.55e-05	CAL0005411	ARA1	D-Arabinose dehydrogenase; enzyme oferythroascorbic acid biosynthesis; NADP+ cofactor; activetoward D-arabinose, L-fucose, L-xylose, L-galactose;inhibited by metal ions, thiol group-specific reagents;induced on adherence to polystyrene
orf19.2688	0.273204	8.32e-05	CAL0003534		Predicted ORF in Assemblies 19, 20 and 21
orf19.6952	0.272639	6.05e-05	CAL0000298		Protein not essential for viability
orf19.6769	0.272302	3.08e-05	CAL0004930		Predicted ORF in Assemblies 19, 20 and 21
orf19.2830	0.272026	1.67e-05	CAL0005106		Predicted ORF in Assemblies 19, 20 and 21
orf19.7392	0.271148	9.77e-06	CAL0004832		Predicted ORF in Assemblies 19, 20 and 21
orf19.5267	0.269766	0.000133	CAL0003597		Putative cell wall protein; downregulated incore caspofungin response; transcription is repressed inresponse to alpha pheromone in SpiderM medium;transcription repressed in ace2 null mutant
orf19.4191	0.268913	2.48e-05	CAF0007003		ORF Predicted by Annotation Working Group
orf19.1971	0.26834	1.41e-05	CAL0002668		Predicted ORF in Assemblies 19, 20 and 21
orf19.3682	0.268221	1.12e-05	CAL0000465	CWH8	Putative dolichyl pyrophosphate (Dol-P-P)phosphatase; ketoconazole-induced; expression is increasedin a fluconazole-resistant isolate
orf19.4399	0.268139	6.5e-05	CAL0001191		Predicted ORF in Assemblies 19, 20 and 21
orf19.4125	0.267474	2.26e-05	CAL0005633		Putative transcription factor with zinc fingerDNA-binding motif
orf19.5905	0.266465	3.18e-05	CAL0003238		Predicted ORF in Assemblies 19, 20 and 21;induced upon biofilm formation
orf19.3649	0.266324	6.9e-06	CAL0000409		Predicted ORF in Assemblies 19, 20 and 21
orf19.173	0.266153	1.48e-05	CAL0003208		Putative transcription factor with zinc fingerDNA-binding motif
orf19.7601	0.264681	0.000206	CAL0000793		Predicted ORF in Assemblies 19, 20 and 21
orf19.7657	0.263896	5.04e-05	CAL0000921		Predicted ORF in Assemblies 19, 20 and 21
orf19.7118	0.263713	1.23e-05	CAL0002851		Predicted ORF in Assemblies 19, 20 and 21
orf19.7384	0.263065	1.41e-05	CAL0004804		Predicted ORF in Assemblies 19, 20 and 21
orf19.693	0.262765	1.88e-05	CAL0001164		Predicted ORF in Assemblies 19, 20 and 21
orf19.5066	0.262607	1.28e-05	CAL0001723		Predicted ORF in Assemblies 19, 20 and 21;essential; S. cerevisiae ortholog is essential
orf19.5431	0.262488	6e-06	CAL0005229		Predicted ORF in Assemblies 19, 20 and 21
orf19.6297	0.261462	0.000155	CAL0000624		Predicted ORF in Assemblies 19, 20 and 21
orf19.1735	0.2588	2.53e-05	CAL0000833		Predicted ORF in Assemblies 19, 20 and 21
orf19.6417	0.258753	2.17e-05	CAL0002141		Predicted ORF in Assemblies 19, 20 and 21
orf19.7050	0.258702	3.44e-05	CAL0002077	NOP15	Protein described as a nucleolar ribosomebiogenesis factor; hyphal-induced expression
orf19.2973	0.258202	1.91e-05	CAL0006105		Predicted ORF in Assemblies 19, 20 and 21
orf19.2712	0.257212	7.03e-05	CAL0004182	HCA4	Putative role in regulation of biogenesis of thecell wall; upregulated in biofilm
orf19.6540	0.256512	7.99e-06	CAL0003180	PFK2	Beta subunit of phosphofructokinase (PFK), whichis a heteromultimer of Pfk1p and Pfk2p; PFK is activatedby fructose 2,6-bisphosphate or AMP, inhibited by ATP;downregulated upon phagocytosis or hyphal growth;fluconazole-induced
orf19.6556	0.25569	4.82e-05	CAL0003218		Predicted ORF in Assemblies 19, 20 and 21
orf19.646	0.254569	7.99e-06	CAL0001010	GLN1	Protein described as similar to glutamatesynthase; regulated by Tsa1p, Tsa1Bp under H2O2 stressconditions
orf19.5020	0.25456	7e-05	CAL0001614		Predicted ORF in Assemblies 19, 20 and 21
orf19.5067	0.254557	6.82e-05	CAL0001724		Predicted ORF in Assemblies 19, 20 and 21
orf19.882	0.254205	2.43e-05	CAL0002893	HSP78	Protein described as a heat-shock protein;transcriptionally regulated by macrophage response;transcription is regulated by Nrg1p, Mig1p, Gcn2p, Gcn4p;heavy metal (cadmium) stress-induced
orf19.4739	0.253213	5.47e-05	CAL0004436		Predicted ORF in Assemblies 19, 20 and 21
orf19.6347	0.252158	2.18e-05	CAL0001327		Predicted ORF in Assemblies 19, 20 and 21
orf19.2654	0.252112	7.37e-05	CAL0003473	RMS1	Protein induced during the mating process
orf19.5845	0.251898	3.75e-05	CAL0002354		Protein described as large subunit ofribonucleotide reductase; transcriptionally regulated byiron; expression greater in low iron
orf19.2023	0.251534	6.82e-05	CAL0004358	HGT7	Putative glucose transporter, major facilitatorsuperfamily; glucose-, fluconazole-, Snf3p-induced,expressed at high glucose; upregulated in biofilm; C.albicans glucose transporter family comprises 20 members;12 TM regions predicted
orf19.76	0.250049	2.73e-05	CAL0000659		Predicted ORF in Assemblies 19, 20 and 21
orf19.7085	0.248781	6.14e-06	CAL0002175		Predicted ORF in Assemblies 19, 20 and 21;induced in core stress response; induced by heavy metal(cadmium) stress via Hog1p; oxidative stress-induced viaCap1p; macrophage-downregulated gene
orf19.1089	0.247577	2.78e-05	CAL0001256		Predicted ORF in Assemblies 19, 20 and 21
orf19.1963	0.247251	1.29e-05	CAL0002635		Predicted ORF in Assemblies 19, 20 and 21
orf19.3478	0.24687	1.73e-05	CAL0005065	NIP7	Protein described as a nucleolar protein withrole in ribosomal assembly; hyphal induced
orf19.5078	0.2466	8.87e-06	CAL0001761		Predicted ORF in Assemblies 19, 20 and 21
orf19.6343	0.245834	2.24e-05	CAL0001319		Predicted ORF in Assemblies 19, 20 and 21
orf19.3665	0.245643	2.79e-05	CAL0000436		Predicted ORF in Assemblies 19, 20 and 21
orf19.6637	0.245048	1.61e-05	CAL0004017		Predicted ORF in Assemblies 19, 20 and 21
orf19.3304	0.244977	8.11e-06	CAL0004045		Predicted ORF in Assemblies 19, 20 and 21
orf19.6886	0.24481	6.38e-05	CAL0005905		Predicted ORF in Assemblies 19, 20 and 21
orf19.3759	0.244304	2.3e-05	CAL0001223		Predicted ORF in Assemblies 19, 20 and 21
orf19.1891	0.243171	8.01e-06	CAL0001825	2008-04-01	Vacuolar aspartic proteinase; mRNA abundance isequivalent in yeast-form and mycelial cells but iselevated at lower growth temperatures; upregulated in thepresence of human neutrophils
orf19.4760	0.243122	6.6e-05	CAL0004512		Predicted ORF in Assemblies 19, 20 and 21
orf19.1783	0.242346	2.69e-05	CAL0000963	YOR1	Protein similar to S. cerevisiae Yor1p, which isa plasma membrane transporter of the ATP-binding cassette(ABC) family involved in resistance to aureobasidin A;transcription is specific to white cell type
orf19.5908	0.242259	8.84e-06	CAL0003246	TEC1	TEA/ATTS transcription factor involved inregulation of hypha-specific genes; required for wild-typebiofilm formation; regulates BCR1; directlytranscriptionally regulated by Cph2p under some growthconditions; alkaline upregulated
orf19.6771	0.242116	9.49e-06	CAL0004945	UBI4	Ubiquitin precursor (polyubiquitin), containsthree tandem repeats of the ubiquitin peptide that areprocessed to individual units; transcription is induced bystress; mRNA found in yeast-form and mycelial cells atsimilar abundance
orf19.6828	0.241374	8.67e-05	CAF0007087		ORF Predicted by Annotation Working Group
orf19.3539	0.240223	5.19e-05	CAL0005891		Predicted ORF in Assemblies 19, 20 and 21
orf19.603	0.239934	1.25e-05	CAL0000877		Predicted ORF in Assemblies 19, 20 and 21
orf19.1388	0.23988	2.23e-05	CAL0003945		Predicted ORF in Assemblies 19, 20 and 21;induced upon biofilm formation
orf19.338	0.239048	6.47e-06	CAL0004758		Predicted ORF in Assemblies 19, 20 and 21; Hog1p-downregulated; shows colony morphology-related generegulation by Ssn6p
orf19.6052	0.237492	3.03e-05	CAL0005143		Predicted ORF in Assemblies 19, 20 and 21
orf19.3630	0.236722	2.06e-05	CAL0000367	RRP8	Predicted ORF in Assemblies 19, 20 and 21;induced upon biofilm formation
orf19.1607	0.23661	5.6e-06	CAL0006317	ALR1	Putative transporter of divalent cations; hyphal-induced expression; fungal-specific (no human or murinehomolog)
orf19.1486	0.2365	8.16e-06	CAL0004738		Predicted ORF in Assemblies 19, 20 and 21;possibly spurious ORF (Annotation Working Groupprediction)
orf19.6968	0.236469	1.05e-05	CAL0000346		Predicted ORF in Assemblies 19, 20 and 21; Hog1p-downregulated
orf19.5180	0.236322	0.00205324	CAL0002689		Protein described as a putative cysteineperoxidase; transcriptionally induced by interaction withmacrophage; fluconazole induced; Fkh2p-downregulated;caspofungin repressed
orf19.2330	0.236096	9.07e-06	CAL0000714		Predicted ORF in Assemblies 19, 20 and 21;similar to S. cerevisiae Yor205cp; transposon mutationaffects filamentous growth
orf19.1945	0.234486	1.72e-05	CAL0002586	AUR1	Inositolphosphorylceramide (IPC) synthase,catalyzes the key step in the synthesis of sphingolipids;potential target for antifungal drugs; mutations conferresistance to aureobasidin A
orf19.4634	0.233817	1.22e-05	CAL0003670		Predicted ORF in Assemblies 19, 20 and 21
orf19.7469	0.233448	9.7e-06	CAL0005634	ARG1	Similar to argininosuccinate synthase; enzyme ofarginine biosynthesis; increased transcription is observedupon benomyl treatment; regulated by Gcn4p, Rim101p;induced in response to amino acid starvation (3-aminotriazole treatment)
orf19.661	0.23264	2.16e-05	CAL0001053	KRR1	Decreased transcription is observed upon benomyltreatment or in an azole-resistant strain thatoverexpresses MDR1; induced upon biofilm formation
orf19.7451	0.232301	1.83e-05	CAL0005577	FUN31	Protein not essential for viability; similar toS. cerevisiae Psk1p, which is a putative serine/threonineprotein kinase
orf19.5507	0.232229	6.9e-06	CAL0006067	ENP1	Protein similar to S. cerevisiae Enp1p;transposon mutation affects filamentous growth
orf19.1902	0.231789	5.32e-05	CAL0002495		Predicted ORF in Assemblies 19, 20 and 21
orf19.535	0.231093	7.99e-06	CAL0000162	RBR1	Glycosylphosphatidylinositol (GPI)-anchored cellwall protein required for filamentous growth at acidic pH;expression is repressed by Rim101p and activated by Nrg1p
orf19.1799	0.23093	4.27e-06	CAL0001002		Putative general amino acid permease; fungal-specific (no human or murine homolog)
orf19.3117	0.229287	3.23e-05	CAF0006972	CSA2	Predicted ORF in Assemblies 19, 20 and 21;downregulated by Rim101p at pH 8; regulated by Tsa1p,Tsa1Bp in minimal media at 37 deg; induced by ketoconazoleand nitric oxide
orf19.3364	0.228979	8.7e-06	CAL0004173		Predicted ORF in Assemblies 19, 20 and 21;possibly spurious ORF (Annotation Working Groupprediction)
orf19.563	0.228775	2.03e-05	CAL0000267		Predicted ORF in Assemblies 19, 20 and 21
orf19.4907	0.228246	0.000151	CAL0006205		Predicted ORF in Assemblies 19, 20 and 21;increased transcription is observed upon fluphenazinetreatment; possibly transcriptionally regulated by Tac1p;induced by nitric oxide; fungal-specific (no human ormurine homolog)
orf19.562	0.226274	4.99e-06	CAL0000265	FGR13	Protein lacking an ortholog in S. cerevisiae;transposon mutation affects filamentous growth; possiblyspurious ORF (Annotation Working Group prediction)
orf19.5605	0.225073	4.46e-06	CAL0000534		Predicted ORF in Assemblies 19, 20 and 21;fungal-specific (no human or murine homolog)
orf19.6529	0.223902	5.75e-06	CAL0003131	CDC34	Transcription is regulated by Nrg1p and Tup1p,and by Gcn2p and Gcn4p
orf19.7668	0.223329	2.13e-05	CAL0000956	MAL2	Alpha-glucosidase that hydrolyzes sucrose;required for sucrose utilization; transcriptionallyregulated by Suc1p; expression is induced by maltose,repressed by glucose; transposon mutation affectsfilamentous growth
orf19.4898	0.223107	6.65e-06	CAL0005529		Predicted ORF in Assemblies 19, 20 and 21
orf19.6686	0.223096	1.73e-05	CAL0004137		Predicted ORF in Assemblies 19, 20 and 21;essential; S. cerevisiae ortholog is essential
orf19.2758	0.222003	7.03e-05	CAL0004242	PGA38	Putative GPI-anchored protein of unknownfunction; repressed during cell wall regeneration
orf19.4078	0.221256	6.01e-06	CAL0004911		Predicted ORF in Assemblies 19, 20 and 21
orf19.4752	0.221246	3.26e-06	CAL0004476	MSN4	Putative transcription factor; zinc finger DNA-binding motif; similar to S. cerevisiae Msn4p, but not asignificant stress response regulator in C. albicans;partly complements STRE-activation defect of S. cerevisiaemsn2 msn4 double mutant
[truncated: 230 more rows]

## Sheet: WT 3 h
3 h
ORF	WT	WT FDR	CGD ID	Gene Name	Description
[truncated: 1,550 more rows]

## Sheet: mut 3 h
3 h
[truncated: 1,541 more rows]

## Sheet: WT 5 h
5 h
[truncated: 1,887 more rows]

## Sheet: mut 5 h 
5 h
[truncated: 1,982 more rows]
