# Supplementary material for: Genomic and functional analyses unveil the response to hyphal wall stress in Candida albicans cells lacking β(1,3)-glucan remodeling
Source: BMC Genomics. 2016 Jul 2;17:482. doi: 10.1186/s12864-016-2853-5 (PMC4942948; doi:10.1186/s12864-016-2853-5)
Supplement: Additional file 2: — Class 1: Transcripts that are more abundant in the phr1Δ mutant than in the wild type. (XLSX 45 kb) [file 12864_2016_2853_MOESM2_ESM.xlsx]

## Sheet: Class 1
Additional file 1. Class 1 - transcripts that are more abundant in the phr1Δ than in the wild type
Green: expression ratio ≤ 0.5		each time was compared to time zero in the same strain
Red: expression ratio ≥ 2		each time was compared to time zero in the same strain
Light blue: mutant ratio/wild type ratio≥ 2 statistically significant values		Values obtained from two expression rations ≤ 0.5 (green/green) were excluded
Time after induction				1 h			3 h			5 h
ORF	GeneName	Functional category	WT	phr1	phr1/WT (RF)	WT	phr1	phr1/WT (RF)	WT	phr1	phr1/WT (RF)	Description
orf19.5741	ALS1	Adhesion	0.519851	1.44434	2.77837	0.161403	0.222415	1.37801	0.403226	0.0930015	0.230644	Adhesin, ALS family
orf19.2649	PCL1	Cell cycle							0.32557	3.80133	11.6759	Cyclin homolog
orf19.3207	CCN1	Cell cycle	0.683634	2.37165	3.46918	0.424477	2.52864	5.95707	0.725414	5.74008	7.91284	G1 cyclin; Cdc28p-Ccn1p initiates Cdc11p phosphorylation on hyphal induction
orf19.403	PCL2	Cell cycle	0.479877	1.86826	3.89321	0.148371	1.59204	10.7301	0.339979	2.27822	6.70105	Cyclin homolog
orf19.663	GIN4	Cell cycle	1.96113	3.89484	1.98602	0.59216	2.37695	4.01402	0.983739	3.17473	3.22721	Septin ring assembly; phosphorylates septin Cdc11
orf19.3856	CDC28	Cell cycle	2.90548	4.62823	1.59293	1.56349	3.07806	1.96871	2.20704	5.31471	2.40808	Cyclin-dependent protein kinase
orf19.4002	DUN1	Cell cycle	1.99573	2.24681	1.12581				0.986253	2.05034	2.07892	Protein kinase involved in DNA damage cell-cycle checkpoint
orf19.4308	HSL1	Cell cycle	1.82371	5.34159	2.92896	1.51914	3.27904	2.15848	1.93914	3.59	1.85133	Protein kinase involved in determination of morphology via regulation of Swe1p andCdc28p
orf19.4257	INT1	Cell cycle	1.6517	2.2209	1.34461	0.963088	2.03049	2.10831	1.27249	2.26644	1.78111	Structurally similar to integrin; involved in morphogenesis regulation
orf19.6610		Cell polarity/cytoskeleton	1.24867	1.62505	1.30142	0.649427	1.38645	2.13488	0.748069	2.19357	2.93231	Microtubule binding
orf19.17	SCP1	Cell polarity/cytoskeleton	0.520243	1.13371	2.1792	0.713396	1.06341	1.49063	0.448369	1.21046	2.6997	Putative cortical actin cytoskeleton protein
orf19.3501		Cell polarity/cytoskeleton	2.38777	4.11894	1.72502	0.980749	2.03079	2.07065	1.57206	2.72523	1.73355	Sc ortholog Pxl1 localizes to sites of polarized growth; required for selection and/or maintenance of polarized growth sites
orf19.2416.1	MLC1	Cell polarity/cytoskeleton	5.24819	10.3216	1.96669	3.28848	5.84443	1.77725	4.01435	5.6583	1.40952	Microtubule-dependent localized protein to Spitzenkorper and cytokinetic ring in hyphae
orf19.5544	SAC6	Cell polarity/cytoskeleton	0.34393	0.88304	2.5675	1.28813	1.73457	1.34658	1.59884	2.18782	1.36838	Fimbrin; actin filament bundling protein
orf19.3740	PGA23	Cell wall	0.0847472	1.82001	21.4757	0.190193	4.21801	22.1775	0.155257	10.1781	65.5565	Predicted GPI-anchored cell surface protein
orf19.750		Cell wall	0.192292	1.23898	6.44321	0.320782	3.55899	11.0947	0.211614	7.61328	35.9771	Predicted cell wall protein; in vitro substrate for Kex2p
orf19.6202	RBT4	Cell wall	2.86748	6.1895	2.15851	0.413541	4.14462	10.0223	1.04225	9.27582	8.89978	Extracellular Pry family member
orf19.535	RBR1	Cell wall	0.160584	0.231093	1.43908	0.295832	0.718628	2.42918	0.348458	2.31911	6.65536	GPI-anchored cell wall protein, repressed by Rim101
orf19.2990	XOG1	Cell wall	0.532305	1.24897	2.34634	0.105108	0.323442	3.07725	0.226475	1.33074	5.8759	Major exo-β(1,3)-glucanase family GH5
orf19.4255	ECM331	Cell wall	2.30845	5.41007	2.34359	1.03448	5.37714	5.1979	1.19964	6.29885	5.25059	GPI-anchored plasma membrane and cell wall protein, CS-induced
orf19.5384	CHS8	Cell wall	3.78381	8.34231	2.20474	2.95948	5.8971	1.99261	2.57924	11.0711	4.29237	Chitin synthase for long fibrils, induced by cell wall regeneration
orf19.6420	PGA13	Cell wall	0.117333	0.400896	3.41673	1.77997	7.23499	4.06467	8.93691	32.7605	3.66575	GPI-anchored cell wall protein
orf19.4765	PGA6	Cell wall	2.22678	6.15831	2.76557	0.507001	3.43216	6.76953	0.923711	3.1655	3.42694	GPI-cell wall protein, similar to ScCCW12
orf19.2706	CRH11	Cell wall	1.99663	9.29111	4.6534	1.23361	5.14673	4.17209	2.2874	7.56894	3.30897	GPI-cell wall transglycosylase of GH16 family, CS-induced
orf19.3893	SCW11	Cell wall	0.995202	0.560581	0.563284	0.550945	0.763097	1.38507	0.29019	0.80284	2.7666	Cell wall protein; downregulated in core caspofunginresponse
orf19.1690	TOS1	Cell wall	4.25328	7.49024	1.76105	0.997822	2.51023	2.51571	2.67377	4.97553	1.86087	Protein similar to alpha agglutinin anchor subunit
orf19.2685	PGA54	Cell wall	8.4689	16.9487	2.00129	6.25191	22.1175	3.53772	14.0647	24.3008	1.72778	Putative GPI-anchored protein
orf19.6594	PLB3	Cell wall	0.816729	1.24373	1.52282	1.04598	2.37716	2.27265	2.12875	3.19438	1.50059	GPI-anchored cell surface phospholipase B
orf19.2952	EXG2	Cell wall	2.98784	6.62999	2.21899	2.28334	3.12894	1.37034	2.86869	3.83119	1.33552	GPI-anchored cell wall protein,similar to Sc exo-1,3-beta-glucosidase Exg2p;predicted Kex2p substrate
orf19.7298	CHS2	Cell wall	1.9785	4.82637	2.43941	1.32412	2.60301	1.96584	2.49196	3.2945	1.32205	Chitin synthase; required for wild-type chitin deposition in hyphae; transcription is regulated during dimorphic transition
orf19.7214		Cell wall	0.246077	0.583424	2.3709	2.34465	2.12879	0.907934	4.45008	5.70883	1.28286	β(1,3)-glucan endoglucosidase; induced during cell wall regeneration
orf19.675		Cell wall	0.129058	0.770849	5.97289	0.344471	0.408229	1.18509	0.658508	0.810073	1.23016	Cell wall protein of unknown function; induced in core CS-response
orf19.5305	RHD3	Cell wall	0.81594	1.65173	2.02432	0.429499	1.45488	3.38738				GPI-anchored yeast-associated cell wall protein
orf19.3715	ASF1	Chromatin/chromosomes	1.43488	3.17172	2.21043				0.674982	1.20909	1.79129	Protein similar to S.cerevisiae Asf1p, which is a chromatin assembly complex component
orf19.7232	IRR1	Chromatin/chromosomes	1.90934	4.4791	2.34589	0.816005	1.6516	2.024	0.972004	1.51032	1.55382	Putative cohesin complex subunit
orf19.6568	SMC6	Chromatin/chromosomes	0.900771	1.33781	1.48519	0.347367	0.709111	2.04139	0.609723	0.848949	1.39235	Putative structural maintenance of chromosomes (SMC) protein
orf19.1854	HHF22	Chromatin/chromosomes	2.33512	5.20254	2.22795	2.09904	5.36738	2.55707	3.12454	4.21623	1.34939	Putative histone H4
orf19.6924	HTA1	Chromatin/chromosomes	2.33707	4.98865	2.13457	1.46673	4.24674	2.89538	2.34895	3.06394	1.30439	Histone H2A
orf19.1059	HHF1	Chromatin/chromosomes	2.68617	4.49888	1.67483	1.73074	5.50503	3.18074	3.10716	3.97687	1.27991	Putative histone H4
orf19.1052		Chromatin/chromosomes	1.98923	3.35309	1.68562	1.31533	4.2696	3.24603	2.08485	2.48246	1.19071	Predicted histone H2B
orf19.1051	HTA2	Chromatin/chromosomes	2.94628	4.39946	1.49323	1.70891	4.15503	2.43139	2.34674	2.26005	0.963058	Putative histone H2A
orf19.6925	HTB1	Chromatin/chromosomes	2.24516	3.76165	1.67545	1.64	3.67005	2.23784	2.42198	2.14057	0.883809	Histone H2B
orf19.4664	NAT4	Chromatin/chromosomes	0.449459	1.16336	2.58836				0.237224	0.197261	0.831538	Putative histone acetyl transferase
orf19.4616	POL30	DNA replication and repair	1.52693	4.01889	2.63201	0.540157	1.89796	3.51373	0.942772	2.40492	2.5509	Putative DNA pol processivity factor
orf19.5182	POL3	DNA replication and repair	1.15075	1.62814	1.41485	0.947587	1.52829	1.61282	0.90903	2.03031	2.23349	Catalytic subunit of DNA pol delta
orf19.3322	DUT1	DNA replication and repair	1.96427	4.56268	2.32283	0.714066	2.26161	3.16723	0.909696	1.77775	1.95422	dUTP-pyrophosphatase, dTTP de novo biosynthesis
orf19.5487	CDC46	DNA replication and repair	0.835956	2.13998	2.55993	0.26678	0.654309	2.45261	0.601036	1.16395	1.93657	Putative hexameric MCM helicase complex subunit
orf19.2093	RFA1	DNA replication and repair	1.2342	2.74207	2.22173	0.9847	2.06304	2.09509	1.14398	2.19954	1.92271	Putative DNA replication factor A
orf19.3761	CDC54	DNA replication and repair	0.875667	2.14227	2.44645	0.342982	0.486828	1.4194	0.496665	0.86605	1.74373	Putative pre-replication complex helicase subunit
orf19.5779	RNR1	DNA replication and repair	2.0581	4.13711	2.01016	0.39299	1.35555	3.44933	1.03728	1.76077	1.69748	Large subunit of ribonucleotide reductase
orf19.2611	MCM6	DNA replication and repair	1.2571	2.54414	2.02382	0.455049	1.05654	2.32182	0.58752	0.976874	1.66271	Putative MCM DNA replication initiation complex component
orf19.3752	RAD51	DNA replication and repair	2.50818	3.36439	1.34137	0.912048	2.97521	3.26212	1.71245	2.31037	1.34916	Protein involved in homologous recombination and DNA repair
orf19.926	EXO1	DNA replication and repair	1.13179	1.70941	1.51035	0.35516	1.14622	3.22734	0.702433	0.897081	1.27711	Exodeoxyribonuclease
orf19.7425		DNA replication and repair	2.28909	4.56059	1.99232	2.24907	4.23342	1.8823	2.98846	3.64486	1.21965	Base-excision repair
orf19.2267	RFA2	DNA replication and repair	1.75916	3.03287	1.72405	0.854447	2.06718	2.41932	1.26633	1.54221	1.21786	Putative DNA replication factor A
orf19.4030		DNA replication and repair	1.39539	2.17451	1.55836	0.448119	1.1879	2.65086	0.906315	1.08545	1.19766	Orthologs have DNA primase activity
orf19.4945	MSH6	DNA replication and repair	2.16596	3.14239	1.45081	1.24196	3.90021	3.14037				Protein similar to Sc Msh6p, which isinvolved in mismatch repair
orf19.2796		DNA replication and repair	1.19953	4.17393	3.47964							DNA replication initiation
orf19.5873	POL1	DNA replication and repair	1.75854	5.584	3.17537							Putative DNA directed DNA polymerase α
orf19.1586	FGR22	Filamentous growth	0.143577	0.792432	5.51922	0.633985	1.84924	2.91685	0.425577	1.39549	3.27905	Putative PtdIns-specificphospholipase C (PI-PLC)
orf19.1208		Filamentous growth	1.46951	3.85565	2.62377	0.572645	1.93648	3.38165	1.06211	3.33473	3.13973	Member of FGR6 family
orf19.6896		Filamentous growth	1.38495	4.72526	3.41187	0.60612	1.94333	3.20617	1.02246	3.01525	2.949	Member of FGR6 family
orf19.5191	FGR6-1	Filamentous growth	1.40023	5.48813	3.91946	0.587397	2.53135	4.30943	1.23345	3.55326	2.88074	Member of FGR6 family
orf19.5315	FGR6	Filamentous growth	1.81623	5.23947	2.88481	0.566068	2.57573	4.5502	1.32083	3.32114	2.51444	Member of FGR6 family; transposon mutation affects filamentous growth
orf19.4712	FGR6-3	Filamentous growth	1.36676	3.46487	2.5351	0.766243	2.05778	2.68555	1.20423	2.66824	2.21572	Member of FGR6 family
orf19.1234	FGR6-10	Filamentous growth	1.37125	4.56445	3.32868	0.605246	1.82451	3.01449	1.33553	2.76349	2.06921	Member of FGR6 family
orf19.3490	FGR6-4	Filamentous growth	1.25913	3.24832	2.57981				1.31702	2.65765	2.01793	Member of a family encoded by FGR6-related genes in the RB2 repeat sequence
orf19.5775		Filamentous growth	1.19511	7.95644	6.65751							Member of a family encoded by FGR6-related genes
orf19.4506	LYS22	Metabolism	3.58967	3.74034	1.04197	0.298133	0.769956	2.58259	0.125708	0.690737	5.49477	Putative homocitrate synthase
orf19.2896	SOU1	Metabolism	0.180738	0.933864	5.16695	0.313595	0.365451	1.16536	0.261934	1.30143	4.96855	Enzyme involved in utilization of L-sorbose
orf19.24	RTA2	Metabolism	0.416968	2.00706	4.81348	0.178458	0.59319	3.32398	0.419756	1.64326	3.91478	Putative flippase for sphingolipids; sphingoid metabolic process; CS-induced
orf19.837	GNA1	Metabolism	2.07741	4.32126	2.08012	1.788	1.96963	1.10158	0.620909	1.46158	2.35394	Glucosamine-6-phosphate acetyltransferase
orf19.1618	GFA1	Metabolism	3.10005	8.77686	2.8312	2.32838	4.80908	2.06542	3.30667	7.58812	2.29479	Glucosamine-6-phosphate synthase
orf19.979	FAS1	Metabolism	1.53081	4.43338	2.89611	3.57904	7.31426	2.04363	1.90503	3.03414	1.5927	β-subunit of fatty acid synthase
orf19.2761		Metabolism	2.47926	5.5823	2.2516				2.11543	2.99106	1.41392	Putative GPI anchor assembly protein
orf19.6459	DPP3	Metabolism	3.07892	9.57095	3.10854	5.30746	8.94162	1.68473	10.1753	14.0554	1.38133	Diacylglycerol Pyrophosphate phosphatase (DGPP); required for farnesol biosynthesis
orf19.5949	FAS2	Metabolism	1.87868	4.64184	2.4708	5.31236	10.4055	1.95874	2.61741	3.03964	1.16132	α-subunit of fatty acid synthase
orf19.7466	ACC1	Metabolism	1.14975	2.99391	2.60397	3.89546	7.64462	1.96244	1.73498	1.73623	1.00072	Putative acetyl-coenzyme-A carboxylase; CS-repressed
orf19.3827		Metabolism	0.491099	1.05901	2.1564	1.18367	1.16534	0.984513	1.00286	0.866408	0.863934	Metalloprotease of the mitochodnrial inner membrane
orf19.7227		Metabolism	0.385925	0.765751	1.98419	1.03843	0.844164	0.812924	2.98985	1.0507	0.351424	Protein type 1 phosphatase regulatory subunit, similar to ScYIP1
orf19.2244		Oxido-reduction processes	0.368454	1.29445	3.5132	3.89721	3.26601	0.838036	0.979107	3.54423	3.61986	Similar to oxidoreductases and to Sc Yjr096wp
orf19.7306		Oxido-reduction processes	0.461023	0.85432	1.85309	2.4146	2.53128	1.04832	3.92805	7.76033	1.97562	Aldo-keto reductase family protein
orf19.5806	ALD5	Oxido-reduction processes	0.417187	0.827888	1.98445	2.25384	2.41425	1.07117	1.72514	2.73662	1.58632	NAD-aldehyde dehydrogenase
orf19.4309	GRP2	Oxido-reduction processes	0.203259	0.565805	2.78366	1.31153	1.37862	1.05116	1.5316	2.18328	1.42549	Methylglyoxalreductase induced in stress response
orf19.4716	GDH3	Oxido-reduction processes	16.5897	19.503	1.1756	9.65028	23.9783	2.48472	35.5323	46.7404	1.31544	NADP-glutamate dehydrogenase, Rim101-induced at pH 8
orf19.1910		Oxido-reduction processes	0.497166	1.0364	2.08462	0.760285	0.709601	0.933335	0.507502	0.662042	1.30451	Predicted NADH-dependent flavin oxidoreductase
orf19.1340		Oxido-reduction processes	2.31252	3.26607	1.41234	3.58755	11.0387	3.07696	4.82958	6.01859	1.24619	Putative aldose reductase
orf19.4274	PUT1	Oxido-reduction processes	1.80412	4.113	2.27979				1.9935	1.82077	0.913354	Putative proline oxidase, proline catabolism, alkaline-regulated by Rim101p
orf19.2192	GDH2	Oxido-reduction processes	0.521905	1.19496	2.28961	1.50678	1.96944	1.30706	2.40788	1.98515	0.824439	Putative NAD-specific glutamate dehydrogenase
orf19.5542	SAP6	Pathogenesis	45.8762	23.8097	0.519				10.8305	28.7972	2.6589	Secreted aspartyl protease
orf19.6864		Protein folding/modification	1.40262	3.5187	2.50866	0.176414	0.384249	2.1781	0.326043	1.12736	3.4577	Putative ubiquitination
orf19.2444	CHS7	Protein folding/modification							1.17143	2.86631	2.44685	Protein required for ER export of Chs3p
orf19.6029	ROT1	Protein folding/modification	0.749518	1.38885	1.85299	0.348657	0.977304	2.80305	0.459863	1.04433	2.27097	Similar to the ER protein Sc Rot1p, which is involved in cell wall 1,6-beta-glucan biosynthesis and protein glycosylation
orf19.3682	CWH8	Protein folding/modification	0.318651	0.268221	0.841739	0.547541	0.738887	1.34946	2.65226	5.32312	2.00701	Putative dolichyl pyrophosphate (Dol-P-P) phosphatase; protein N-glycosylation
orf19.1665	MNT1	Protein folding/modification	1.39688	3.28582	2.35226	0.95482	1.24431	1.30319	1.18587	1.66682	1.40557	Golgi α(1,2)-mannosyltransferase
orf19.5334		RNA processing and biogenesis	0.154299	0.547998	3.55152	0.866776	1.0142	1.17008	1.33494	0.802015	0.600785	Ortholog of S. cerevisiae Tis11, a mRNA-binding protein
orf19.4866	CPP1	Signal transduction	0.761076	0.922181	1.21168	0.767604	1.70174	2.21695	0.763346	3.96585	5.19534	MAPK phosphatase, represses Y-H switch, regulates Cph1p filamentation pathway
orf19.3775	SSK2	Signal transduction	0.976049	1.53328	1.57091	1.15629	2.4295	2.10112	1.06627	5.0052	4.69413	MAP kinasekinase kinases; regulates Hog1 activation and signaling
orf19.5797	PLC2	Signal transduction	0.156038	0.829913	5.31864	0.585854	1.58419	2.70408	0.44763	1.36373	3.04656	(PtdIns)-specificphospholipase C (PI-PLC)
orf19.1702	ARF3	Signal transduction	5.30314	10.2013	1.92363	2.004	3.9649	1.97849	3.20798	4.33678	1.35187	Intracellular protein transport
orf19.7504		Signal transduction	0.481987	1.24446	2.58194	1.20446	1.68295	1.39727	1.20219	1.67753	1.3954	Ortholog of Sc Rts3p, a component of the protein phosphatase type 2A complex; induced in core CS-response
orf19.4082	DDR48	Stress response	0.0610562	0.466098	7.63392	0.48802	2.20976	4.52801	1.92499	6.63887	3.44879	Immunogenic stress-associated protein, CS-induced
orf19.2125		Stress response	7.79787	16.2465	2.08346	6.62383	20.3566	3.07323	10.4226	25.1377	2.41185	CipC-like antibiotic response protein; fungal specific
orf19.5992	WOR2	Transcription	1.26145	1.02093	0.809327	0.950709	2.20175	2.3159	0.985149	4.99843	5.07378	Transcriptional regulator of white-opaque switching
orf19.7017	YOX1	Transcription	1.74283	3.84332	2.20521	2.43563	5.71029	2.34448	2.51825	9.63043	3.82426	Putative homeodomain-containing repressor of transcription
orf19.4670	CAS5	Transcription	0.667556	1.43393	2.14803	0.432948	0.845077	1.95191	0.418958	1.27155	3.03504	Transcription factor, cell wall damage response
orf19.3469		Transcription	0.461082	1.40078	3.03804	0.443926	0.573673	1.29227	0.472164	0.964108	2.04189	Component of transcription complexes
orf19.5286	YCP4	Transcription	0.240934	0.574704	2.38532	0.949473	0.990675	1.04339	0.906085	1.77617	1.96027	Putative flavodoxin; FMN binding protein
orf19.4725	SWI6	Transcription	1.5071	3.57078	2.36931				1.08787	1.41675	1.30231	Putative component of transcription complexes
orf19.7359	CRZ1	Transcription	0.418558	1.01336	2.42107	0.322339	0.363926	1.12902	0.47186	0.589831	1.25001	Calcineurin-regulated transcription factor
orf19.4328	CCC2	Transport	0.545221	0.733273	1.34491	0.540648	1.22675	2.26905	0.645804	2.68479	4.15728	Copper-transporting P-type ATPase of Golgi; CS-repressed
orf19.2209	YVC1	Transport	1.95163	3.84302	1.96913	0.881317	2.46089	2.79228	1.78207	4.34333	2.43724	Calcium transport
orf19.1813	FLC2	Transport	1.13734	2.87212	2.52529	1.03173	2.54073	2.46259	1.29645	2.79644	2.157	Protein involved in heme uptake; putative FADtransporter, similar to ScFlc2p
orf19.1224	FRP3	Transport	1.23799	3.10967	2.51187	1.06378	1.1856	1.11452	1.12929	1.60415	1.42049	Ammonium transport
orf19.5022		Transport	1.78929	3.5414	1.97922	5.18064	6.03159	1.16425	6.29963	6.30845	1.0014	Ion transport
orf19.4688	DAG7	Unknown function; gene named	0.247999	0.534542	2.15542	0.0288847	0.0434138	1.503	0.0301943	0.157197	5.2062	Secretory protein
orf19.2344	ASR1	Unknown function; gene named	0.0360344	0.0592079	1.64309	0.054511	0.0838863	1.53889	0.149019	0.623008	4.18072	Putative heat shock protein
orf19.3417	ACF2	Unknown function; gene named							1.81138	4.86928	2.68815	Putative endo-1,3-beta-glucanase; fungal-specific
orf19.5037	HRQ2	Unknown function; gene named							2.42888	5.5476	2.28401	Protein not essential for viability
orf19.7350	RCT1	Unknown function; gene named	0.299741	0.615017	2.05183	0.68923	0.647337	0.939218	0.697994	1.34726	1.93019	Predicted ORF
orf19.668	TOS4	Unknown function; gene named	1.08341	2.23306	2.06113	0.585605	1.32145	2.25656	0.784899	0.958619	1.22133	Putative forkhead transcription factor
orf19.1120	FAV2	Unknown function; gene named	6.40224	7.16194	1.11866	0.784273	2.54667	3.24717				Adhesin-like protein
orf19.4867	SWE1	Unknown function; gene named	1.09175	2.33701	2.14062							Functional homolog of Sc Swe1p
orf19.5799		Unknown function; gene not named	0.39711	1.77701	4.47485	0.259886	0.736199	2.83278	0.509725	2.64009	5.17944	Predicted ORF
orf19.4531		Unknown function; gene not named	0.697772	0.665366	0.953557	0.503138	1.5318	3.0445	0.596202	2.46827	4.13999	Putative PDR subfamily ABC transporter
orf19.3694		Unknown function; gene not named							0.703571	2.72226	3.86921	Predicted ORF
orf19.3216		Unknown function; gene not named	2.22839	5.6367	2.52949	0.78167	2.32063	2.96882	1.07665	3.8628	3.58779	Probable Rab GTPase activator
orf19.4706		Unknown function; gene not named	0.671255	1.94199	2.89308	0.563482	1.49851	2.65938	1.11631	3.82587	3.42725	Predicted ORF
orf19.3007.2		Unknown function; gene not named	0.404691	1.39976	3.45884	1.63135	2.20519	1.35176	1.16431	3.88076	3.3331	Predicted ORF
orf19.5518		Unknown function; gene not named	1.04648	3.47289	3.31863	0.733388	3.64674	4.97246	1.13171	3.77084	3.33199	Predicted ORF
orf19.3145		Unknown function; gene not named	1.53319	4.49702	2.93311	0.665163	1.77636	2.67056	1.37536	4.27608	3.10906	Predicted ORF
orf19.4485		Unknown function; gene not named	1.33561	4.38209	3.28097	0.578498	2.47387	4.27637	1.02301	3.13393	3.06344	Predicted ORF
orf19.1144		Unknown function; gene not named							4.00111	11.0091	2.75151	Predicted ORF with SEL-1 like protein domain
orf19.1344		Unknown function; gene not named	4.09244	13.5688	3.31559	13.5138	24.1476	1.78689	5.49249	14.9945	2.72999	Predicted ORF; fluconazole-induced
orf19.727		Unknown function; gene not named	1.29182	4.53113	3.50756				1.29386	3.44592	2.66328	Member of a family encoded by FGR6-related genes in the RB2 repeat sequence
orf19.914		Unknown function; gene not named	1.23019	4.70757	3.82671	0.576731	1.88661	3.27122	1.19745	3.1678	2.64545	Predicted ORF
orf19.6929		Unknown function; gene not named	1.22531	1.56992	1.28125				0.793124	2.07538	2.61671	Predicted ORF:orthologs have phosphatase activity
orf19.7506		Unknown function; gene not named	1.11177	1.43651	1.2921	0.895765	2.1736	2.42653	0.851699	2.2259	2.61348	Predicted ORF
orf19.6527		Unknown function; gene not named	0.224909	0.396984	1.76508	0.171591	0.210471	1.22659	0.253819	0.647273	2.55013	Predicted ORF
orf19.2777		Unknown function; gene not named	3.58203	7.89068	2.20285	1.04499	2.81243	2.69134	2.48934	5.8968	2.36882	Predicted ORF from Assembly 19; removed from Assembly 20
orf19.7005		Unknown function; gene not named	1.36679	4.85167	3.5497	0.578792	1.90199	3.28613	1.13931	2.77549	2.43612	Predicted ORF
orf19.5295		Unknown function; gene not named				3.38698	3.25152	0.960006	2.60649	6.18669	2.37357	Potential member of endo/exonuclease/phosphatase family
orf19.6960		Unknown function; gene not named	1.34324	3.736	2.78133	0.663507	2.31192	3.4844	1.26767	2.98007	2.35083	Predicted ORF
orf19.7297		Unknown function; gene not named	1.25484	1.85459	1.47796	4.43741	4.71542	1.06265	3.85961	8.89138	2.3037	Putative cystathionine gamma-synthase; Hog1p-induced; Gcn4p-regulated
orf19.3737		Unknown function; gene not named	1.42888	3.04914	2.13394	1.79534	2.71068	1.50984	2.1322	4.892	2.29435	Protein with a Vps9 vacuolar protein sorting protein domain
orf19.1565		Unknown function; gene not named	0.571504	0.587252	1.02756	0.22834	0.519382	2.2746	0.306702	0.702089	2.28916	Protein with unknown function
orf19.1830		Unknown function; gene not named	0.86445	1.67718	1.94017				2.97969	6.31569	2.11958	Predicted ORF
orf19.4553		Unknown function; gene not named	0.774506	0.867927	1.12062	0.818571	0.838921	1.02486	1.0961	2.24127	2.04478	Predicted ORF
orf19.5777		Unknown function; gene not named	0.864102	1.54013	1.78235				1.50634	3.0703	2.03824	Predicted ORF
orf19.1099		Unknown function; gene not named	1.70163	4.45329	2.61707				1.62633	3.30687	2.03334	Predicted ORF
orf19.1862		Unknown function; gene not named	0.0558755	0.150312	2.69012	0.216116	0.145611	0.673761	0.303594	0.612778	2.01841	Possible stress protein
orf19.4922		Unknown function; gene not named	2.6042	2.68609	1.03145	3.14265	3.18949	1.0149	2.48557	4.97606	2.00198	Predicted ORF
orf19.3144		Unknown function; gene not named	1.68113	3.59438	2.13807	0.642704	2.10163	3.26999	1.14734	2.25852	1.96848	Predicted ORF
orf19.2959.1		Unknown function; gene not named	0.127789	0.945737	7.40076	1.30269	2.06088	1.58202	3.00541	5.87275	1.95406	Predicted ORF
orf19.1632		Unknown function; gene not named	0.211079	0.933953	4.42467	0.502432	1.11465	2.21851	0.535614	1.85787	3.46868	Predicted ORF
orf19.3110		Unknown function; gene not named	0.216007	0.617015	2.85646				0.15056	0.492466	3.2709	Possible mannosyltransferase
orf19.246		Unknown function; gene not named	0.475542	1.49373	3.1411	0.708332	0.963605	1.36039	0.71749	1.4815	2.06484	Predicted metalloendopeptidase
orf19.4666		Unknown function; gene not named	1.64215	4.82477	2.93809	1.51799	2.82636	1.86191	1.88049	3.61332	1.92148	Predicted ORF
orf19.4014		Unknown function; gene not named	1.99548	3.57941	1.79376	4.22097	9.30543	2.20457	5.93995	11.117	1.87157	Putative ER phospholipid phosphatase, similar to ScCDC1
orf19.4246		Unknown function; gene not named	0.915608	2.46546	2.69271	2.36647	1.96088	0.828608	2.59479	4.83118	1.86188	Protein similar to Sc Ykr070wp; transposon mutation affects filamentous growth
orf19.3615		Unknown function; gene not named	0.628402	2.15468	3.42883	1.78306	3.83603	2.15137	2.30236	3.98279	1.72987	Predicted ORF; CS-induced
orf19.3983		Unknown function; gene not named	1.65922	3.64892	2.19917	2.28619	1.81284	0.792952	1.44428	2.41045	1.66896	Predicted ORF
orf19.3932		Unknown function; gene not named	0.129103	0.571699	4.42822	1.44484	1.7468	1.20899	2.42333	3.98549	1.64463	Predicted RNA binding protein; induced in core CS response
orf19.6474		Unknown function; gene not named	0.897088	2.50272	2.78983	1.29514	1.3346	1.03047	1.88115	2.85793	1.51924	Protein with chitin synthesis regulation, resistance to Congo red domain
orf19.3793		Unknown function; gene not named	3.5819	7.43442	2.07555	6.09248	7.57911	1.24401	6.47416	9.54921	1.47497	Predicted ORF
orf19.4390		Unknown function; gene not named	0.864099	2.31839	2.68301				1.16079	1.65857	1.42883	Predicted ORF
orf19.462		Unknown function; gene not named	0.476554	1.00023	2.09888	1.75631	1.70681	0.971814	1.36065	1.86251	1.36884	Predicted ORF
orf19.94		Unknown function; gene not named	0.234734	0.619614	2.63964	1.1643	1.44094	1.2376	2.10958	2.55538	1.21132	Predicted ORF
orf19.2030		Unknown function; gene not named	0.22804	1.03225	4.52662	1.01927	1.12642	1.10512	1.99256	2.38572	1.19731	Predicted ORF
orf19.6737		Unknown function; gene not named	1.14172	2.62229	2.29679	1.09772	1.81007	1.64893	2.64549	2.77251	1.04801	Predicted ORF
orf19.6843		Unknown function; gene not named	2.52036	5.5182	2.18945				1.95976	1.91415	0.976726	Putative role in nucleosome assembly
orf19.5137.1		Unknown function; gene not named	1.91521	2.50667	1.30882	1.15098	2.27189	1.97387	2.33454	2.04027	0.873946	Predicted ORF
orf19.5282		Unknown function; gene not named	0.2415	0.785802	3.25384	0.498869	0.34785	0.697277	1.20433	0.453066	0.376196	Predicted ORF
orf19.5514		Unknown function; gene not named	2.07256	4.35024	2.09897							Predicted ORF
orf19.95		Unknown function; gene not named	0.727166	4.89862	6.73659							Predicted ORF
orf19.1825		Unknown function; gene not named	1.45853	3.02418	2.07344							Protein not essential for viability; filament induced
orf19.1935		Unknown function; gene not named	1.04455	2.04358	1.95643							Predicted ORF, dubious
