# Supplementary material for: Genomic and functional analyses unveil the response to hyphal wall stress in Candida albicans cells lacking β(1,3)-glucan remodeling
Source: BMC Genomics. 2016 Jul 2;17:482. doi: 10.1186/s12864-016-2853-5 (PMC4942948; doi:10.1186/s12864-016-2853-5)
Supplement: Additional file 3: — Class 2: Transcripts that are less abundant in the phr1Δ mutant than in the wild type. (XLSX 39 kb) [file 12864_2016_2853_MOESM3_ESM.xlsx]

## Sheet: Class 2
Additional file 3. Class 2 - transcripts that are less abundant in the phr1D than in the wild type
Green: expression ratio ≤ 0.5		each time was compared to time zero in the same strain
Red: expression ratio ≥ 2		each time was compared to time zero in the same strain
Light blue: mutant ratio/wild type ratio ≤ 0.5 only statistically significant		Values obtained from two xpression rations ≥ 2 (red/red) were excluded
Time after induction				1 h			3 h			5 h
ORF	GeneName	Functional category	WT	phr1	phr1/WT (RF)	WT	phr1	phr1/WT (RF)	WT	phr1	phr1/WT (RF)	Description
orf19.2121	ALS2	Adhesion	0.890731	1.37528	1.54399	0.340268	0.240368	0.706409	0.937026	0.18294	0.195235	ALS family
orf19.1097	ALS2	Adhesion	0.630558	1.05689	1.67612	0.201597	0.175841	0.872243	0.421683	0.100744	0.23891	ALS family protein, role in adhesion
orf19.4555	ALS4	Adhesion	0.196937	0.133987	0.680357				0.0345306	0.013993	0.405235	ALS family protein
orf19.5760	IHD1	Cell wall	3.21505	4.63814	1.44263	1.27582	0.953908	0.74768	2.37928	0.821304	0.34519	GPI-anchored protein
orf19.6782	BMT1	Cell wall	0.859956	0.522712	0.607835	2.45083	1.58469	0.646595	3.21206	1.65747	0.516014	β-mannosyltransferase for cell wall phopshopeptidomannan
orf19.2758	PGA38	Cell wall	0.607849	0.222003	0.365228	1.1211	1.13902	1.01598	0.998157	1.33761	1.34008	Putative adhesin-like GPI-anchored protein; repressed during cell wall regeneration
orf19.5032	SIM1	Cell wall	0.459555	0.393723	0.856748	0.0534703	0.0185086	0.346148				Cell wall bigoenesis; SUN family member
orf19.5288	IFE2	Metabolism	0.0098919	0.010402	1.05157	0.0783151	0.0436834	0.55779	0.197769	0.0197118	0.0996708	Alcohol dehydrogenase, decreased expression in hyphae
orf19.3707	YHB1	Metabolism	0.0507806	0.0589245	1.16038	0.063408	0.0509134	0.802949	0.162917	0.0201975	0.123974	Nitric oxide dioxygenase, nitric oxidescavenging/detoxification
orf19.3710	YHB5	Metabolism	2.00823	1.19451	0.594806	0.146936	0.0330244	0.224754	0.406113	0.0696717	0.171557	Protein related to flavohemoglobins, filament induced
orf19.3670	GAL1	Metabolism	0.201352	0.197065	0.978711	0.573253	0.384475	0.670689	2.24332	0.488578	0.217792	Galactokinase
orf19.7314	CDG1	Metabolism	0.178821	0.211437	1.18239	0.657124	0.458067	0.697078	1.63285	0.39402	0.241308	Putative cysteine dioxygenases
orf19.3675	GAL7	Metabolism	0.101886	0.0748504	0.73465	0.218573	0.185791	0.850019	0.786463	0.198749	0.252713	Putative galactose-1-phoshphate uridyl transferase
orf19.3672	GAL10	Metabolism	0.158332	0.140149	0.885159	0.361958	0.279099	0.771083	1.44111	0.38421	0.266607	UDP-glucose 4-epimerase
orf19.7227		Metabolism	0.385925	0.765751	1.98419	1.03843	0.844164	0.812924	2.98985	1.0507	0.351424	Protein type 1 phosphatase regulatory subunit, similar to ScYIP1
orf19.3669	SHA3	Metabolism	0.498218	0.796418	1.59853	2.30648	2.17983	0.945088	4.83215	1.94427	0.402361	Putative serine/threonine kinase involved in glucose transport
orf19.7593		Metabolism	0.492678	0.3534	0.717305	0.135471	0.11255	0.830808	0.196259	0.095785	0.488053	Putative asparaginase
orf19.6343	FEN1	Metabolism	0.383142	0.245834	0.641626	0.131722	0.110213	0.836708	0.157668	0.082648	0.524189	Putative fatty acid elongase
orf19.1517	ARO3	Metabolism	4.67534	4.27594	0.914574	1.3029	1.2931	0.992476	0.670966	0.35976	0.536183	3-deoxy-D-arabinoheptulosonate-7-phosphate synthase; aromatic amino acid synthesis
orf19.3483		Metabolism	0.0285856	0.028334	0.991198	0.0486454	0.0326412	0.671002	0.0721093	0.0387242	0.537021	Glycorophosphodiester phopshodiesterase
orf19.2050		Metabolism	0.770565	0.714716	0.927522	2.03984	1.04796	0.513745	3.48686	1.90475	0.546266	Ortholog(s) have sterol esterase activity; lipid metabolism
orf19.85	GPX2	Metabolism	5.11401	4.71225	0.92144	3.0495	1.33686	0.438388	17.2077	2.56534	0.14908	Glutathione peroxidase activity
orf19.449		Metabolism				3.48061	1.49183	0.428613	7.62232	2.38827	0.313326	Putative phosphatidyl synthase
orf19.385	GCV2	Metabolism	8.58726	1.88676	0.219716	3.58319	2.33226	0.650891	5.43991	3.15225	0.579468	Role in glycine catabolism
orf19.2251	AAH1	Metabolism	0.0878942	0.0583821	0.664232	0.0500189	0.0245364	0.490543	0.0284779	0.0209877	0.73698	Adenine deaminase involved in purine salvage and nitrogen catabolism
orf19.3412	ATG15	Metabolism	1.02719	1.20063	1.16885	3.21732	1.74831	0.543407	3.41557	3.0775	0.90102	Putative lipase required for intravacuolar lysis of autophagic bodies; similar to ScAtg15p
orf19.1847	ARO10	Metabolism	0.160823	0.0619029	0.384913	0.601387	0.632107	1.05108	0.479578	0.560555	1.16885	Aromatic decarboxylase, alkaline downregulated
orf19.6844	ICL1	Metabolism	0.014853	0.00681088	0.458551	0.0262617	0.0223677	0.851722	0.0331211	0.0437659	1.32139	Isocitrate lyase
orf19.4631	ERG251	Oxidoreduction processes	0.427883	0.609794	1.42514	1.1127	0.802623	0.721332	1.95871	0.608979	0.310909	C-4 sterol methyl oxidase; erogosterol synthesis
orf19.7077	FRE7	Oxidoreduction processes	0.87359	0.344898	0.394806	3.26045	1.17742	0.361122	2.3787	0.836995	0.351871	Putative ferric reductase
orf19.3521	ARH2	Oxidoreduction processes							3.89948	1.7284	0.44324	Adenodroxin-NADPH oxidoreductase, heme biosynthesis
orf19.3656	COX15	Oxidoreduction processes	0.493742	0.563294	1.14087	0.401948	0.40174	0.999483	0.250173	0.119814	0.478926	Cytochrome oxidase assembly protein
orf19.3331	ABC1	Oxidoreduction processes	0.56588	0.437091	0.77241	0.877113	0.951935	1.0853	0.888613	0.474827	0.534346	Putative ubiquinol-cytochrome-c reductase
orf19.5394.1		Oxidoreduction processes	0.828553	0.719717	0.868643	0.824438	0.598509	0.72596	0.894142	0.483098	0.540292	Ortholog(s) have role in mitochondrial respiratory chain complex IV assembly
orf19.4279	MNN1	Protein folding/modification	0.0731487	0.0278712	0.381021				0.0448187	0.0168506	0.375973	Putative α(1,3)-mannosyltransferase
orf19.3301		Protein folding/modification	0.33599	0.148372	0.441597	0.295007	0.136509	0.462731	0.422472	0.188958	0.447268	Putative ubiquitin ligase
orf19.4871	ERO1	Protein folding/modification	0.172316	0.155347	0.901525	0.273958	0.142319	0.519493	0.316697	0.117671	0.371556	Protein with role in formation of disulfide bonds
orf19.7654	CPR6	Protein folding/modification	1.25207	1.4127	1.12829	3.33415	1.75096	0.52516	1.22935	0.978911	0.796286	Peptidyl-prolyl cis-trans isomerase,protein refolding
orf19.5961		Protein folding/modification	0.582409	0.465153	0.79867	3.10558	1.63115	0.525231	2.99091	1.91169	0.639167	Chaperone for proteasome assembly
orf19.3479		RNA processing and biogenesis	0.646504	0.614231	0.950081	0.150052	0.165733	1.1045	0.22254	0.101671	0.456865	snRNA pseudouridine synthesis
orf19.2735	SEN2	RNA processing and biogenesis	1.22582	0.577505	0.471117				0.348479	0.165482	0.474871	Putative tRNA splicing endonuclease subunit
orf19.494		RNA processing and biogenesis	0.302191	0.12672	0.419338	0.123261	0.0573886	0.465586	0.138521	0.0660182	0.476593	Putative RNA binding protein, role in pre-rRNA processes
orf19.6736		RNA processing and biogenesis	0.528562	0.459743	0.869799	0.293223	0.276385	0.942575	0.406752	0.195683	0.481086	Protein required for mitochondrial ribosome small subunit biogenesis
orf19.7369	TRM12	RNA processing and biogenesis	0.654573	0.517777	0.791015	0.378707	0.307228	0.811255	0.75129	0.355393	0.473044	S-adenosylmethionine-dependent methyl transferase
orf19.3303		RNA processing and biogenesis	0.425081	0.196206	0.461573	0.222669	0.120289	0.540213	0.151184	0.119515	0.790532	tRNA methyltransferase
orf19.2934		RNA processing and biogenesis	0.429722	0.177554	0.413184	0.0599876	0.0411138	0.685371	0.0630688	0.0589104	0.934066	Ribosomal large subunit export from nucleous; similar to Sc Bud20p reuired for bus site selection
orf19.6234		RNA processing and biogenesis	0.462218	0.200924	0.434695	0.0871644	0.0990537	1.1364	0.115869	0.0921323	0.79514	Putative U2 snRNP, rRNA processing and prereplicative complex
orf19.4746	JIP5	RNA processing and biogenesis	0.487126	0.217272	0.446029	0.113411	0.0895946	0.789998	0.0888062	0.0731963	0.824226	Role in biogenesis of ribosomal large subunit, repressed in core stress response
orf19.5500	MAK16	RNA processing and biogenesis	0.393975	0.176996	0.449256	0.0607802	0.0337293	0.554939	0.0665009	0.0404284	0.607938	Putative constituent of 66S prerimosomal particles
orf19.154		RNA processing and biogenesis	0.339953	0.159593	0.469456	0.115812	0.0944727	0.815739	0.10667	0.145307	1.3622	Biogenesis ribosomal small subunit, ortholog of Sc UTP30
orf19.1642		RNA processing and biogenesis	0.388828	0.183449	0.471801	0.0706804	0.0537855	0.760968	0.0843061	0.0733339	0.869853	Ortholog of Sc loc1p, Involved in assymetric RNA localization and in rRNA biogenesis
orf19.2185	NSA1	RNA processing and biogenesis	0.443075	0.217475	0.490832	0.118521	0.0939809	0.792945	0.0910049	0.0867827	0.953604	Ribosomal large subunit biogenesis, similar to Sc NSA1
orf19.809		RNA processing and biogenesis	0.334137	0.164119	0.491171	0.0807012	0.077377	0.958808	0.102095	0.0913127	0.894389	Involved in maturation of LSU-rRNA precursor, similar to ScNOP12
orf19.5732	NOG2	RNA processing and biogenesis	0.434032	0.213219	0.491252	0.0951338	0.0895011	0.940793	0.132496	0.111807	0.843852	Nucleolar GTPase; export of large ribosomal subunit from nucleus
orf19.3630	RRP8	RNA processing and biogenesis	0.478584	0.236722	0.49463	0.110977	0.117848	1.06191	0.203345	0.151932	0.747165	Ribosomal protein; large ribosomal subunit biogenesis
orf19.3756	CHR1	RNA processing and biogenesis	0.407528	0.201577	0.494634	0.122189	0.158275	1.29533	0.179575	0.18629	1.0374	ATP-dependent RNA helicase
orf19.2830	RRP9	RNA processing and biogenesis	0.54629	0.272026	0.497951	0.0716247	0.0659869	0.921287	0.062899	0.0687556	1.09311	Ribosomal protein similar to ScRrp9
orf19.5507	ENP1	RNA processing and biogenesis	0.554516	0.232229	0.418796	0.078803	0.0716042	0.908649	0.100767	0.0935119	0.928004	Required for pre rRNA processing
orf19.2654	RMS1	RNA processing and biogenesis	0.55995	0.252112	0.450241				0.169341	0.225075	1.32912	Putative ribosomal lysine methyl transferase; regulation of translation
orf19.2314		RNA processing and biogenesis	0.600912	0.284505	0.473456	0.128543	0.117858	0.916876	0.182334	0.168508	0.924174	Protein involved in nucleolar integrity and processing of pre-rRNA; similar to ScCgr1p
orf19.6831	PRP5	RNA processing and biogenesis	0.702931	0.343962	0.489325				0.568239	0.559693	0.984961	pre mRNA processing helicase activity
orf19.7154	UTP18	RNA processing and biogenesis	0.581052	0.288623	0.496724	0.108755	0.0979633	0.900769	0.121693	0.112487	0.92435	U3 SnoRNA-associated protein
orf19.1673	PPT1	Signal transduction	1.14788	0.639546	0.557153	0.434817	0.281556	0.647529	0.458573	0.225562	0.491878	Putative ser/thr protein phosphatase
orf19.1760	RAS1	Signal transduction	2.62705	2.73111	1.03961	2.2015	1.41322	0.641934	3.73318	1.79763	0.481529	Small GTPase; regulates cAMP and MAP kinase pathways
orf19.822	HSP21	Stress response	0.0110508	0.0154049	1.39401	0.0667263	0.0205528	0.308017	0.920298	0.0579296	0.0629465	Small heat-shock protein
orf19.882	HSP78	Stress response	0.216343	0.254205	1.17501	0.722489	0.292849	0.405334	0.842103	0.379512	0.450672	Heat-shock protein
orf19.4941	TYE7	Transcription	0.0703463	0.289878	4.12073	0.621355	0.489258	0.787406	1.63414	0.371799	0.227521	Putative bHLH (basic region, helix-loop-helix)transcription factor; CS-repressed
orf19.1826	MDM34	Transcription	0.794932	0.459901	0.578542	0.746016	0.518591	0.695147	2.26002	0.685004	0.303096	Putative transcription factor
orf19.6817	FCR1	Transcription	0.477713	0.463504	0.970255				0.130935	0.0402709	0.307563	Zinc cluster transcription factor, fluconazole resistance
orf19.6514	CUP9	Transcription	0.517949	0.307713	0.5941	0.269693	0.17921	0.664497	0.816207	0.260223	0.31882	Transcription factor, Y-H switched repressed
orf19.6824	TRY6	Transcription	0.090143	0.0450793	0.500086	0.0339829	0.019584	0.576289	0.0562823	0.0188497	0.334914	h-L-h-transcription factor regulator of cell adhesions,
orf19.1168	ZCF3	Transcription	1.68741	0.48994	0.29035	0.591666	0.222677	0.376356	0.790835	0.298454	0.377391	Zn(II)2Cys6 domain transcription factor required for filamentous growth
orf19.2356	CRZ2	Transcription	0.0324641	0.0133241	0.410427				0.0395934	0.0177136	0.447389	Putative transcription factor, zinc finger,similar to ScCrz1p
orf19.2748	ARG83	Transcription	1.41923	2.56191	1.80514	0.507945	0.512672	1.00931	0.929229	0.448471	0.482627	GAL4-like Zn(II)2Cys6 transcription factor
orf19.1187	CPH2	Transcription	0.229334	0.288727	1.25898	0.337166	0.32195	0.95487	0.72068	0.357415	0.495941	Myc-bHLH transcription factor; promotes hyphal growth
orf19.3912	GLN3	Transcription	0.851014	0.625458	0.734957	0.630687	0.305723	0.484745	0.66389	0.616452	0.928547	GATA transcription factor, regulation of nitrogen starvation-induced filamentous growth
orf19.7374	CTA4	Transcription	0.290297	0.213583	0.73574	0.311269	0.159133	0.511239	0.210904	0.217543	1.03148	Zn(II)2Cys6 transcription factor
orf19.508	QDR1	Transport	0.0501315	0.0698401	1.39314	0.0794685	0.0366484	0.461169	0.12438	0.0288473	0.231929	Putative Transporter of antibiotic resistance
orf19.2020	HGT6	Transport	0.059651	0.0835758	1.40108	0.358292	0.280989	0.784247	1.01429	0.276148	0.272257	Putative high-affinity MFS glucose transporter
orf19.7313	SSU1	Transport	0.207384	0.0877432	0.423096	0.242724	0.0689762	0.284176	0.245202	0.0717938	0.292795	Protein similar to ScSsu1p sulfiteTransport protein
orf19.6937	PTR2	Transport	0.114361	0.06664	0.582718	0.0560835	0.0336131	0.59934	0.0895884	0.0323075	0.360622	Putative oligopeptide Transporter, repressed by RIM101 at pH 8
orf19.6578		Transport	0.577691	0.291615	0.504795	1.40909	1.05603	0.749443	3.48361	1.38857	0.398602	Predicted membrane transporter; repressed in core CS-response
orf19.2942	DIP5	Transport	0.45603	0.279323	0.612512	0.140433	0.132845	0.945964	0.924824	0.463309	0.50097	Dicarboxylic amino acid permease
orf19.4599	PHO89	Transport	0.297571	0.15383	0.516954	0.0342646	0.027687	0.808034	0.0929156	0.0480336	0.516959	Phosphate permease
orf19.1978	GIT2	Transport	0.263775	0.171726	0.65103	0.177458	0.0819389	0.461736	0.222586	0.119284	0.5359	Putative glycerophosphoinositol permease
orf19.7219	FTR1	Transport	2.99244	1.62958	0.544564	3.61072	1.84533	0.511071	8.90349	7.34636	0.82511	High-affinity iron permease; involved in pathogenesis
orf19.473	TPO4	Transport	0.976122	0.750715	0.769079	1.00709	0.514345	0.510726	0.627096	0.531043	0.846828	Putative sperimidine transporter
orf19.2107.1	MUQ1	Unknown function; gene named	0.0411695	0.120043	2.91583	2.14306	1.55247	0.724417	5.90493	1.68701	0.285695	ATP biosynthetic process
orf19.3369	MOH1	Unknown function; gene named	0.457582	0.449024	0.981297				3.53967	1.49002	0.420948	Similar to ScMOH1
orf19.2462	PRN3	Unknown function; gene named	0.643785	0.348053	0.540635	0.506336	0.722223	1.42637	0.90366	0.472488	0.52286	Protein similar to pirin
orf19.171	DBP2	Unknown function; gene named	0.281868	0.171023	0.606747	0.13742	0.123472	0.898498	0.230529	0.122999	0.533552	Putative DEAD-box family ATP-dependent RNA helicase invovled in mRNA decay
orf19.5496	AVT1	Unknown function; gene named	0.899216	0.802476	0.892418	0.731491	0.662225	0.905308	0.739327	0.394727	0.533901	Putative vacuolar transporter
orf19.2723	HIT1	Unknown function; gene named	0.368993	0.132431	0.358898	0.252729	0.160744	0.636033	0.364281	0.213682	0.586584	Protein similar to Sc Hit1p, which is required for growth at hightemperature
orf19.4651	PGA53	Unknown function; gene named	0.524338	0.640271	1.2211	0.398597	0.204722	0.513606	0.275282	0.30484	1.10737	GPI-anchored cell surface protein
orf19.4044	MUM2	Unknown function; gene named	2.12344	1.71664	0.808424	0.793663	0.388314	0.489268				Protein similar to ScMum2p
orf19.4450.1		Unknown function; gene not named	0.030405	0.123367	4.05746	0.431684	0.2117	0.490406	0.788874	0.0477557	0.0605365	Predicted ORF
orf19.670.2		Unknown function; gene not named	0.031986	0.0595174	1.86073	1.03917	1.06704	1.02682	7.01215	1.33946	0.191019	Predicted ORF; hypoxia
orf19.79		Unknown function; gene not named	0.984333	1.70018	1.72724	0.372583	0.254391	0.682777	1.02425	0.194193	0.189595	Predicted ORF from Assembly 19; removed from Assembly 20
orf19.699		Unknown function; gene not named	0.244827	0.105813	0.432195				0.222911	0.0603174	0.270589	Predicted ORF
orf19.5626		Unknown function; gene not named	0.0797919	0.0844024	1.05778	0.591628	0.365356	0.617544	1.61963	0.465365	0.287328	Plc1-regulated
orf19.5069		Unknown function; gene not named	0.291064	0.507778	1.74456	0.758847	0.421881	0.55595	1.08778	0.35557	0.326876	Similar to Sc meiotic DNA recombinase
orf19.4828		Unknown function; gene not named	0.765284	0.618554	0.808267	1.4503	1.01342	0.698767	2.80671	0.962981	0.3431	WD repeat domain protein
orf19.6770		Unknown function; gene not named	0.22316	0.169974	0.761667	0.198468	0.0873977	0.440362	0.326264	0.116506	0.357091	Predicted ORF
orf19.7396		Unknown function; gene not named	0.144646	0.0809371	0.559554	0.0574963	0.0402595	0.70021	0.142646	0.0527642	0.369897	Predicted ORF
orf19.6556		Unknown function; gene not named	0.481351	0.25569	0.531193	0.941975	0.340595	0.361576	1.0631	0.397797	0.374185	Predicted ORF
orf19.7283		Unknown function; gene not named	0.0232268	0.0140568	0.605196	0.0271343	0.014066	0.518384	0.0350727	0.0131635	0.37532	Predicted ORF
orf19.7085		Unknown function; gene not named	0.256865	0.248781	0.968531	2.35269	0.891061	0.37874	2.90129	1.08964	0.375572	Predicted ORF;induced in core stress response
orf19.6683		Unknown function; gene not named	2.68885	1.75302	0.65196	1.25186	0.962762	0.769065	3.05921	1.16607	0.381167	Predicted vacuolar protein with a calcineurin-like phosphoesterase domain
orf19.1368		Unknown function; gene not named				1.0599	0.54253	0.511871	0.981404	0.40916	0.416913	Predicted ORF
orf19.4816		Unknown function; gene not named	0.550149	0.273822	0.497724	0.712093	0.483624	0.679159	1.09738	0.463806	0.42265	Predicted ORF;induced by nitric oxide
orf19.5842		Unknown function; gene not named	1.14155	0.955306	0.83685				0.795387	0.347146	0.43645	Protein with predicted siroheme synthase middle domains NAD(P)-binding
orf19.1964		Unknown function; gene not named	2.23775	2.55027	1.13966	4.93271	4.19048	0.849529	3.5974	1.59292	0.442798	Predicted ORF
orf19.1363		Unknown function; gene not named	0.0702442	0.0422917	0.602067	0.0159964	0.0104624	0.654048	0.0383195	0.0184541	0.481585	Predicted ORF; Plc1p-regulated
orf19.6448		Unknown function; gene not named	2.47954	2.16785	0.874294	2.85279	1.85521	0.650313	3.08546	1.49616	0.484906	Similar to ubiquitin ligase
orf19.4445		Unknown function; gene not named	0.0838509	0.122663	1.46288	0.123574	0.08347	0.675466	0.146683	0.0716567	0.488512	Predicted ORF; Plc1p-regulated
orf19.6862		Unknown function; gene not named	1.14146	0.658897	0.577242	0.398882	0.267154	0.669756	0.501457	0.249662	0.497872	Chromatin binding
orf19.4580		Unknown function; gene not named	1.02037	0.948307	0.929373	1.37186	0.936049	0.682324	0.949647	0.47307	0.498153	Predicted ORF
orf19.732		Unknown function; gene not named				0.312225	0.331853	1.06287	0.497153	0.253942	0.510793	Possible dehydrogenase
orf19.1861		Unknown function; gene not named	0.644046	0.789042	1.22513				3.34717	1.73086	0.51711	Predicted ORF
orf19.3360		Unknown function; gene not named	0.370873	0.321298	0.866331	0.303491	0.166078	0.547225	0.644849	0.344836	0.534754	Predicted ORF
orf19.6586		Unknown function; gene not named	0.333666	0.35762	1.07179	1.93785	1.30374	0.672779	2.61564	1.41184	0.539768	Predicted ORF
orf19.7296		Unknown function; gene not named	0.147623	0.392918	2.66163	0.248507	0.0884091	0.355761	0.326434	0.1767	0.541304	Putative cation conductance protein
orf19.5607		Unknown function; gene not named	0.681239	0.491456	0.721415	0.309594	0.315555	1.01926	0.323733	0.175666	0.542626	Predicted ORF
orf19.4280		Unknown function; gene not named	0.269216	0.204009	0.757787	0.234033	0.191907	0.819999	0.409412	0.223902	0.546888	Predicted ORF
orf19.2724		Unknown function; gene not named	0.2436	0.125044	0.513317	0.288016	0.12344	0.428588	0.7626	0.419115	0.549586	Predicted ORF
orf19.334		Unknown function; gene not named	2.13348	0.946347	0.443571	16.8976	4.53455	0.268355	21.6591	8.87354	0.409692	Late stage biofilm-induced gene
orf19.6688		Unknown function; gene not named	0.749747	0.465558	0.620954	0.737017	0.355023	0.481703	0.605227	0.344859	0.569801	Predictive ORF
orf19.1287		Unknown function; gene not named	0.343306	0.112944	0.32899	0.129064	0.0816387	0.632545	0.20736	0.122552	0.591012	Predicted ORF
orf19.1505		Unknown function; gene not named	1.55353	1.12361	0.72326	2.38466	1.24709	0.522965	2.02111	1.19937	0.593419	Predicted ORF
orf19.6873.1	KTI11	Unknown function; gene not named	0.353195	0.12853	0.363906	0.0355404	0.0244631	0.688318	0.038074	0.0228659	0.600565	Zn-ribbon protein; synthesis of diphthamide on translation factor eEF2
orf19.775		Unknown function; gene not named	0.411836	0.390577	0.948379	0.926435	0.465162	0.502099	1.30383	0.793677	0.608725	Probable protein involved in vacuolar protein sorting
orf19.1285		Unknown function; gene not named	0.464219	0.306079	0.659341	0.852552	0.32419	0.380258	1.06618	0.653711	0.613134	Putative lipid binding protein
orf19.5678		Unknown function; gene not named	0.779667	0.300903	0.385938				0.396612	0.271554	0.684685	Protein required for synthesis of diphthamide on eEF2 possibily with KIT11
orf19.3644		Unknown function; gene not named	0.318201	0.346844	1.09001	0.380676	0.204836	0.538085	0.458328	0.315444	0.688249	Predicted ORF
orf19.5905		Unknown function; gene not named	0.574235	0.266465	0.464035	0.0815829	0.0802831	0.984068	0.0880678	0.0709727	0.805887	Protein of unknown function
orf19.6316.4		Unknown function; gene not named	0.487163	0.210723	0.432551	0.0799978	0.0793424	0.991807	0.139231	0.123437	0.886567	Predicted ORF
orf19.2515		Unknown function; gene not named	0.322592	0.410743	1.27326	3.33147	1.81002	0.543309	5.14222	5.00584	0.973478	Predicted ORF
orf19.1090		Unknown function; gene not named	0.68361	0.298136	0.43612	0.413566	0.406878	0.983827	0.282328	0.292975	1.03771	Predicted ORF
orf19.5267		Unknown function; gene not named	0.619752	0.269766	0.435281				0.310692	0.524495	1.68815	Putative cell wall adhesin-like protein, CS-repressed
orf19.3142		Unknown function; gene not named	2.4511	1.07147	0.437141							Predicted ORF
